# Supplementary material for: SK4 potentially modulates the alternative splicing profile associated with papillary thyroid cancer development in BHT101 cells
Source: PeerJ journal article supplement (doi:10.7717/peerj.19391), 2025-05-28
Supplement: MIQE_checklist.xls [file MIQE_checklist.xls]

## Sheet: Sheet1
ITEM TO CHECK	IMPORTANCE	CHECKLIST
EXPERIMENTAL DESIGN
Definition of experimental and control groups	E	Line 161
Number within each group	E	Line 170
Assay carried out by core lab or investigator's lab?	D
Acknowledgement of authors' contributions	D
SAMPLE
Description	E	Lines 160-174
Volume/mass of sample processed	D
Microdissection or macrodissection	E	Lines 100-101
Processing procedure	E	Lines 114-116
If frozen - how and how quickly?	E	Lines 127-128
If fixed - with what, how quickly?	E	Lines 127-128
Sample storage conditions and duration (especially for FFPE samples)	E	Lines 127-128
NUCLEIC ACID EXTRACTION
Procedure and/or instrumentation	E	Lines 165-174
Name of kit and details of any modifications	E	Lines 165-167
Source of additional reagents used	D
Details of DNase or RNAse treatment	E	Lines 114-115
Contamination assessment (DNA or RNA)	E	Lines 116-118
Nucleic acid quantification	E	Lines 116-118
Instrument and method	E	Lines 116-118
Purity (A260/A280)	D
Yield	D
RNA integrity method/instrument	E	Lines 117-118
RIN/RQI or Cq of 3' and 5' transcripts	E	Lines 117-118
Electrophoresis traces	D
Inhibition testing (Cq dilutions, spike or other)	E	Lines 165-167
REVERSE TRANSCRIPTION
Complete reaction conditions	E	Lines 165-167
Amount of RNA and reaction volume	E	Lines 120-121
Priming oligonucleotide (if using GSP) and concentration	E	Lines 161-165
Reverse transcriptase and concentration	E	Lines 165-167
Temperature and time	E	Lines 165-167
Manufacturer of reagents and catalogue numbers	D
Cqs with and without RT	D*
Storage conditions of cDNA	D
qPCR TARGET INFORMATION
If multiplex, efficiency and LOD of each assay.	E	Lines 168-172
Sequence accession number	E	Lines 173-174
Location of amplicon	D
Amplicon length	E	Lines 173-174
In silico specificity screen (BLAST, etc)	E	Lines 173-174
Pseudogenes, retropseudogenes or other homologs?	D
Sequence alignment	D
Secondary structure analysis of amplicon	D
Location of each primer by exon or intron (if applicable)	E	Lines 173-174
What splice variants are targeted?	E	Lines 163-165
qPCR OLIGONUCLEOTIDES
Primer sequences	E	Lines 173-174
RTPrimerDB Identification Number	D
Probe sequences	D**
Location and identity of any modifications	E	Lines 173-174
Manufacturer of oligonucleotides	D
Purification method	D
qPCR PROTOCOL
Complete reaction conditions	E	Lines 168-169
Reaction volume and amount of cDNA/DNA	E	Lines 120-121
Primer, (probe), Mg++ and dNTP concentrations	E	Lines 168-169
Polymerase identity and concentration	E	Lines 168-169
Buffer/kit identity and manufacturer	E	Lines 168-169
Exact chemical constitution of the buffer	D
Additives (SYBR Green I, DMSO, etc.)	E	Lines 168-169
Manufacturer of plates/tubes and catalog number	D
Complete thermocycling parameters	E	Lines 168-169
Reaction setup (manual/robotic)	D
Manufacturer of qPCR instrument	E	Lines 168-169
qPCR VALIDATION
Evidence of optimisation (from gradients)	D
Specificity (gel, sequence, melt, or digest)	E	Lines 165-169
For SYBR Green I, Cq of the NTC	E	Lines 165-169
Standard curves with slope and y-intercept	E	Lines 165-169
PCR efficiency calculated from slope	E	Lines 165-169
Confidence interval for PCR efficiency or standard error	D
r2 of standard curve	E	Lines 165-169
Linear dynamic range	E	Lines 165-169
Cq variation at lower limit	E	Lines 165-169
Confidence intervals throughout range	D
Evidence for limit of detection	E	Lines 165-169
If multiplex, efficiency and LOD of each assay.	E	Lines 165-169
DATA ANALYSIS
qPCR analysis program (source, version)	E	Lines 170-174
Cq method determination	E	Lines 170-174
Outlier identification and disposition	E	Lines 170-174
Results of NTCs	E	Lines 170-174
Justification of number and choice of reference genes	E	Lines 170-174
Description of normalisation method	E	Lines 170-174
Number and concordance of biological replicates	D
Number and stage (RT or qPCR) of technical replicates	E	Lines 170-174
Repeatability (intra-assay variation)	E	Lines 170-174
Reproducibility (inter-assay variation, %CV)	D
Power analysis	D
Statistical methods for result significance	E	Lines 170-174
Software (source, version)	E	Lines 170-174
Cq or raw data submission using RDML	D
Table 1. MIQE checklist for authors, reviewers and editors. All essential information (E) must be submitted with the manuscript. Desirable
information (D) should be submitted if available. If using primers obtained from RTPrimerDB, information on qPCR target, oligonucleotides,
protocols and validation is available from that source.
*: Assessing the absence of DNA using a no RT assay is essential when first extracting RNA. Once the sample has been validated as
RDNA-free, inclusion of a no-RT control is desirable, but no longer essential.
**: Disclosure of the probe sequence is highly desirable and strongly encouraged. However, since not all commercial pre-designed assay
vendors provide this information, it cannot be an essential requirement. Use of such assays is advised against.
