# Supplementary material for: SK4 potentially modulates the alternative splicing profile associated with papillary thyroid cancer development in BHT101 cells
Source: PeerJ journal article supplement (doi:10.7717/peerj.19391), 2025-05-28
Supplement: TableS1.xlsx [file TableS1.xlsx]

## Sheet: Sheet1
cancer	infiltrates	Rho	p-value	adj.p-value
THCA (n=509)	Myeloid dendritic cell_TIMER	0.760102	4.88615e-93	2.23639e-89
THCA (n=509)	Macrophage M1_QUANTISEQ	0.737397	7.50145e-85	1.71671e-81
THCA (n=509)	Myeloid dendritic cell_XCELL	0.732402	3.65514e-83	5.57653e-80
THCA (n=509)	Cancer associated fibroblast_EPIC	0.669007	1.27427e-64	1.16646e-61
THCA (n=509)	Myeloid dendritic cell activated_XCELL	0.602745	1.35724e-49	8.8744e-47
THCA (n=509)	T cell NK_XCELL	0.589446	5.47094e-47	3.13006e-44
THCA (n=509)	T cell regulatory (Tregs)_CIBERSORT-ABS	0.571116	1.37096e-43	6.97208e-41
THCA (n=509)	Class-switched memory B cell_XCELL	0.538517	4.79511e-38	1.68825e-35
THCA (n=509)	Monocyte_XCELL	0.537932	5.95395e-38	1.84862e-35
THCA (n=509)	Myeloid dendritic cell resting_CIBERSORT-ABS	0.537885	6.05841e-38	1.84862e-35
THCA (n=509)	Myeloid dendritic cell resting_CIBERSORT	0.520011	3.6975e-35	9.40193e-33
THCA (n=509)	T cell regulatory (Tregs)_CIBERSORT	0.515947	1.50845e-34	3.63378e-32
THCA (n=509)	T cell CD4+ memory resting_CIBERSORT-ABS	0.510988	8.17529e-34	1.87091e-31
THCA (n=509)	Neutrophil_TIMER	0.502933	1.20065e-32	2.4979e-30
THCA (n=509)	Macrophage M2_CIBERSORT-ABS	0.484121	4.86125e-30	9.2708e-28
THCA (n=509)	Cancer associated fibroblast_MCPCOUNTER	0.452829	4.79902e-26	7.08552e-24
THCA (n=509)	T cell CD8+_MCPCOUNTER	0.404455	1.24663e-20	9.35381e-19
THCA (n=509)	NK cell_EPIC	0.403424	1.59157e-20	1.17494e-18
THCA (n=509)	T cell CD8+_QUANTISEQ	0.396683	7.70249e-20	5.10932e-18
THCA (n=509)	Cancer associated fibroblast_TIDE	0.395629	9.82593e-20	6.42475e-18
THCA (n=509)	Macrophage_EPIC	0.375264	9.13904e-18	4.97969e-16
THCA (n=509)	NK cell activated_CIBERSORT-ABS	0.368359	3.95891e-17	2.13175e-15
THCA (n=509)	B cell_XCELL	0.354849	6.30347e-16	3.00531e-14
THCA (n=509)	B cell memory_CIBERSORT-ABS	0.34995	1.66522e-15	7.54624e-14
THCA (n=509)	T cell regulatory (Tregs)_QUANTISEQ	0.340978	9.44658e-15	3.79272e-13
THCA (n=509)	NK cell_QUANTISEQ	0.339805	1.18048e-14	4.69831e-13
THCA (n=509)	T cell CD4+ memory resting_CIBERSORT	0.338361	1.55095e-14	6.01584e-13
THCA (n=509)	B cell memory_CIBERSORT	0.326851	1.29941e-13	4.40548e-12
THCA (n=509)	Monocyte_CIBERSORT-ABS	0.318776	5.47489e-13	1.72818e-11
THCA (n=509)	Myeloid dendritic cell activated_CIBERSORT-ABS	0.317821	6.47218e-13	2.01518e-11
THCA (n=509)	T cell CD8+_CIBERSORT-ABS	0.305938	4.93736e-12	1.43027e-10
THCA (n=509)	T cell follicular helper_CIBERSORT-ABS	0.297221	2.06989e-11	5.33167e-10
THCA (n=509)	Macrophage M0_CIBERSORT-ABS	0.290881	5.69658e-11	1.37954e-09
THCA (n=509)	Mast cell activated_CIBERSORT-ABS	0.290519	6.03088e-11	1.44218e-09
THCA (n=509)	Myeloid dendritic cell activated_CIBERSORT	0.264006	3.17025e-09	5.71269e-08
THCA (n=509)	T cell regulatory (Tregs)_XCELL	0.245489	3.94272e-08	6.05565e-07
THCA (n=509)	Macrophage_XCELL	0.237797	1.06026e-07	1.53086e-06
THCA (n=509)	Macrophage M1_CIBERSORT-ABS	0.230513	2.62377e-07	3.58478e-06
THCA (n=509)	Mast cell_XCELL	0.227828	3.63719e-07	4.77004e-06
THCA (n=509)	B cell memory_XCELL	0.219747	9.48782e-07	1.16112e-05
THCA (n=509)	T cell CD4+ memory_XCELL	0.215872	1.48371e-06	1.73681e-05
THCA (n=509)	T cell CD4+ effector memory_XCELL	0.213033	2.04822e-06	2.33202e-05
THCA (n=509)	T cell CD4+ Th2_XCELL	0.197012	1.1651e-05	0.000114681
THCA (n=509)	Macrophage M0_CIBERSORT	0.183868	4.3839e-05	0.000374349
THCA (n=509)	B cell_MCPCOUNTER	0.175999	9.28654e-05	0.000719196
THCA (n=509)	Macrophage M1_XCELL	0.16002	0.000387013	0.0025269
THCA (n=509)	Mast cell activated_CIBERSORT	0.142309	0.00162322	0.00864897
THCA (n=509)	T cell CD4+_EPIC	0.141428	0.00173631	0.00909277
THCA (n=509)	T cell CD4+ naive_XCELL	0.133467	0.00313646	0.0149382
THCA (n=509)	B cell_QUANTISEQ	0.131212	0.00368773	0.0170838
THCA (n=509)	T cell gamma delta_XCELL	0.125485	0.00550434	0.0239481
THCA (n=509)	T cell CD8+ central memory_XCELL	0.112325	0.0130343	0.0475363
THCA (n=509)	Macrophage M1_CIBERSORT	0.106715	0.0183684	0.0613218
THCA (n=509)	Cancer associated fibroblast_XCELL	0.0938578	0.0382052	0.10903
THCA (n=509)	Myeloid dendritic cell_MCPCOUNTER	0.0909485	0.0446295	0.122758
THCA (n=509)	T cell CD4+ memory activated_CIBERSORT	0.0875005	0.0533967	0.140545
THCA (n=509)	T cell CD4+ memory activated_CIBERSORT-ABS	0.0875002	0.0533976	0.140545
THCA (n=509)	T cell CD4+_TIMER	0.0753853	0.0962297	0.217468
THCA (n=509)	Neutrophil_MCPCOUNTER	0.0706944	0.118846	0.2537
THCA (n=509)	B cell_EPIC	0.0588097	0.194652	0.36026
THCA (n=509)	Neutrophil_QUANTISEQ	0.0568992	0.209574	0.379288
THCA (n=509)	T cell CD4+ Th1_XCELL	0.0375448	0.407921	0.592842
THCA (n=509)	T cell CD4+ (non-regulatory)_XCELL	0.029445	0.516381	0.69088
THCA (n=509)	Neutrophil_CIBERSORT-ABS	0.0282895	0.532984	0.702208
THCA (n=509)	Monocyte_CIBERSORT	0.0222867	0.623336	0.775441
THCA (n=509)	Common myeloid progenitor_XCELL	0.0202872	0.654835	0.796487
THCA (n=509)	T cell gamma delta_CIBERSORT-ABS	0.0187221	0.679929	0.815136
THCA (n=509)	Eosinophil_XCELL	0.018131	0.6895	0.82355
THCA (n=509)	T cell gamma delta_CIBERSORT	0.0174437	0.700694	0.832253
THCA (n=509)	Common lymphoid progenitor_XCELL	0.0166589	0.713553	0.839571
THCA (n=509)	Plasmacytoid dendritic cell_XCELL	0.0152846	0.736266	0.85249
THCA (n=509)	Neutrophil_CIBERSORT	0.0131055	0.77275	0.873154
THCA (n=509)	T cell CD8+ effector memory_XCELL	0.0106017	0.815291	0.90048
THCA (n=509)	Macrophage/Monocyte_MCPCOUNTER	0.00890562	0.844429	0.917352
THCA (n=509)	Monocyte_MCPCOUNTER	0.00890562	0.844429	0.917352
THCA (n=509)	Monocyte_QUANTISEQ	0.00818635	0.856853	0.925175
THCA (n=509)	NK cell_XCELL	0.00254376	0.955302	0.97664
THCA (n=509)	B cell plasma_CIBERSORT-ABS	-0.0119111	0.792967	0.887603
THCA (n=509)	T cell CD8+_XCELL	-0.023144	0.610034	0.763294
THCA (n=509)	NK cell_MCPCOUNTER	-0.034687	0.444554	0.625107
THCA (n=509)	Macrophage M2_CIBERSORT	-0.0379652	0.402688	0.589416
THCA (n=509)	B cell naive_XCELL	-0.048485	0.285092	0.46669
THCA (n=509)	Granulocyte-monocyte progenitor_XCELL	-0.0488291	0.281683	0.463432
THCA (n=509)	T cell follicular helper_CIBERSORT	-0.0558067	0.21847	0.390295
THCA (n=509)	T cell CD8+_TIMER	-0.0640914	0.157465	0.310181
THCA (n=509)	B cell naive_CIBERSORT-ABS	-0.0813156	0.0727038	0.177759
THCA (n=509)	Macrophage M2_QUANTISEQ	-0.0844582	0.0622811	0.159244
THCA (n=509)	MDSC_TIDE	-0.10112	0.0254954	0.0795448
THCA (n=509)	T cell CD8+_CIBERSORT	-0.107522	0.0175001	0.0592002
THCA (n=509)	NK cell activated_CIBERSORT	-0.10756	0.0174598	0.0591515
THCA (n=509)	Neutrophil_XCELL	-0.117884	0.00914591	0.0356655
THCA (n=509)	Mast cell resting_CIBERSORT-ABS	-0.149987	0.000888468	0.00522018
THCA (n=509)	Eosinophil_CIBERSORT-ABS	-0.166333	0.00022361	0.00155778
THCA (n=509)	Eosinophil_CIBERSORT	-0.166933	0.00021203	0.00149532
THCA (n=509)	Mast cell resting_CIBERSORT	-0.181323	5.60808e-05	0.000463325
THCA (n=509)	B cell naive_CIBERSORT	-0.184111	4.28156e-05	0.000366979
THCA (n=509)	T cell CD4+ naive_CIBERSORT-ABS	-0.21648	1.38401e-06	1.63264e-05
THCA (n=509)	T cell CD4+ naive_CIBERSORT	-0.216654	1.35668e-06	1.60453e-05
THCA (n=509)	B cell plasma_XCELL	-0.239053	9.04188e-08	1.3138e-06
THCA (n=509)	B cell_TIMER	-0.244213	4.65645e-08	7.05714e-07
THCA (n=509)	T cell CD8+ naive_XCELL	-0.252544	1.54486e-08	2.45515e-07
THCA (n=509)	T cell CD8+_EPIC	-0.266341	2.2745e-09	4.18088e-08
THCA (n=509)	Macrophage M2_XCELL	-0.282025	2.24793e-10	4.94653e-09
THCA (n=509)	T cell CD4+ central memory_XCELL	-0.298121	1.7892e-11	4.76115e-10
THCA (n=509)	NK cell resting_CIBERSORT-ABS	-0.308471	3.22626e-12	9.52683e-11
THCA (n=509)	NK cell resting_CIBERSORT	-0.32793	1.06866e-13	3.67764e-12
THCA (n=509)	Macrophage_TIMER	-0.349432	1.84353e-15	8.27239e-14
THCA (n=509)	B cell plasma_CIBERSORT	-0.351088	1.33087e-15	6.0914e-14
THCA (n=509)	Hematopoietic stem cell_XCELL	-0.416534	6.67662e-22	5.76583e-20
THCA (n=509)	T cell CD4+ (non-regulatory)_QUANTISEQ	-0.495265	1.45134e-31	2.88816e-29
THCA (n=509)	Macrophage M2_TIDE	-0.552663	2.23868e-40	8.53871e-38
THCA (n=509)	Myeloid dendritic cell_QUANTISEQ	-0.557166	3.84064e-41	1.59806e-38
THCA (n=509)	Endothelial cell_XCELL	-0.569672	2.48794e-43	1.13873e-40
THCA (n=509)	Endothelial cell_EPIC	-0.612964	1.11159e-51	8.47957e-49
THCA (n=509)	Endothelial cell_MCPCOUNTER	-0.671137	3.60709e-65	4.12741e-62
