# Supplementary material for: SK4 potentially modulates the alternative splicing profile associated with papillary thyroid cancer development in BHT101 cells
Source: PeerJ journal article supplement (doi:10.7717/peerj.19391), 2025-05-28
Supplement: TableS2.xlsx [file TableS2.xlsx]

## Sheet: Sequencing result
Table S2. The statistical results of sequenced raw reads and quality filtered reads.
SampleID	raw_total	clean_total	ratio_total	raw_base	clean_base	ratio_base	uniqtag
NC_1	78673382	77887242	0.99	11.801G	11.178G	0.9472	16203576(41.57%)
NC_2	84948898	84124378	0.9903	12.742G	12.098G	0.9495	17131579(40.71%)
NC_3	65076652	64438445	0.9902	9.761G	9.259G	0.9485	13911913(43.15%)
OE_SK4_1	79765324	79006700	0.9905	11.965G	11.340G	0.9478	16593319(41.99%)
OE_SK4_2	80275756	79561927	0.9911	12.041G	11.400G	0.9467	16532179(41.55%)
OE_SK4_3	83509894	82744073	0.9908	12.526G	11.870G	0.9476	17097215(41.31%)
