# Supplementary material for: SK4 potentially modulates the alternative splicing profile associated with papillary thyroid cancer development in BHT101 cells
Source: PeerJ journal article supplement (doi:10.7717/peerj.19391), 2025-05-28
Supplement: TableS3.xlsx [file TableS3.xlsx]

## Sheet: Mapping_of_clean_reads_on_the_r
Table S3 Alignment result of filtered reads on the reference genome.
Sample	NC_1	NC_2	NC_3	SK4-OE_1	SK4-OE_2	SK4-OE_3
Total reads	77187688	83383622	63867550	78322024	78913250	82053580
Total mapped	75089020(97.28%)	80984513(97.12%)	62001414(97.08%)	76013783(97.05%)	76792304(97.31%)	79861386(97.33%)
Total Uniquely mapped	70120946(93.38%)	75135279(92.78%)	57890745(93.37%)	71142051(93.59%)	71760260(93.45%)	74869673(93.75%)
Total Multiple mapped	4968074(6.62%)	5849234(7.22%)	4110669(6.63%)	4871732(6.41%)	5032044(6.55%)	4991713(6.25%)
Total Pairs	38593844	41691811	31933775	39161012	39456625	41026790
Total Uniquely Concordant Pairs	34196890(88.61%)	36615161(87.82%)	28195608(88.29%)	34640566(88.46%)	34945651(88.57%)	36478659(88.91%)
Spliced reads	30378519(43.32%)	32515017(43.28%)	25474914(44.01%)	30473572(42.83%)	31574230(44.00%)	32647599(43.61%)
Nonspliced reads	39742427(56.68%)	42620262(56.72%)	32415831(55.99%)	40668479(57.17%)	40186030(56.00%)	42222074(56.39%)
