# Supplementary material for: SK4 potentially modulates the alternative splicing profile associated with papillary thyroid cancer development in BHT101 cells
Source: PeerJ journal article supplement (doi:10.7717/peerj.19391), 2025-05-28
Supplement: TableS4.xlsx [file TableS4.xlsx]

## Sheet: OE_SK4_vs_NC_Sig_DEG
Gene	baseMean	log2FoldChange	lfcSE	stat	pvalue	padj	NC_1	NC_2	NC_3	OE_SK4_1	OE_SK4_2	OE_SK4_3	Symbol	Chr	GeneType	Description
ENSG00000104783.14	10601.4	4.30413	0.0764023	56.3351	0	0	8.31	8.26	8.52	184.14	147.66	169.2	KCNN4	chr19	protein_coding	potassium calcium-activated channel subfamily N member 4
ENSG00000280614.1	142.64	-0.864625	0.203773	-4.24308	2.2047e-05	0.366851	6.94	5.63	4.2	3.41	2.68	3.19	CH507-513H4.4	chr21	lncRNA	--
ENSG00000214967.5	20.7905	1.85893	0.539089	3.44827	0.00056419	0.999981	0.16	0.09	0.29	0.51	0.85	0.58	NPIPA7	chr16	protein_coding	nuclear pore complex interacting protein family member A7
ENSG00000183305.14	48.9533	-1.29257	0.404641	-3.19437	0.00140136	0.999981	0.8	1.23	0.39	0.36	0.45	0.18	MAGEA2B	chrX	protein_coding	MAGE family member A2B
ENSG00000276070.5	9.69639	2.38859	0.762714	3.1317	0.00173795	0.999981	0.04	0.07	0.07	0.29	0.35	0.34	CCL4L2	chr17	protein_coding	C-C motif chemokine ligand 4 like 2
ENSG00000197969.14	131.707	0.603391	0.202659	2.97738	0.00290727	0.999981	0.16	0.15	0.12	0.26	0.18	0.23	VPS13A	chr9	protein_coding	vacuolar protein sorting 13 homolog A
ENSG00000182379.10	132.992	-0.787105	0.270132	-2.91378	0.00357077	0.999981	2.21	1.34	2.93	1.08	1.58	1.14	NXPH4	chr12	protein_coding	neurexophilin 4
ENSG00000254206.5	47.0104	-1.08981	0.388542	-2.80487	0.00503364	0.999981	0.25	0.68	0.29	0.24	0.15	0.18	NPIPB11	chr16	protein_coding	nuclear pore complex interacting protein family member B11
ENSG00000167359.8	3.69409	4.22448	1.55304	2.72013	0.00652562	0.999981	0	0	0.04	0.12	0.17	0.33	OR51I1	chr11	protein_coding	olfactory receptor family 51 subfamily I member 1
ENSG00000160145.16	18.3077	1.36103	0.508201	2.67813	0.00740343	0.999981	0.01	0.01	0.01	0.03	0.02	0.02	KALRN	chr3	protein_coding	kalirin RhoGEF kinase
ENSG00000279806.1	5.6789	2.91374	1.10645	2.63341	0.00845318	0.999981	0.05	0.01	0	0.21	0.08	0.21	RP11-58O9.2	chr17	TEC	--
ENSG00000279532.1	2.17562	-4.63744	1.79703	-2.58061	0.00986249	0.999981	0.35	0.12	0.11	0	0	0	CTB-96E2.6	chr17	TEC	--
ENSG00000078401.7	27.6984	1.04016	0.40724	2.55417	0.0106443	0.999981	0.22	0.29	0.23	0.48	0.55	0.51	EDN1	chr6	protein_coding	endothelin 1
ENSG00000078579.9	5.20447	-2.85753	1.15822	-2.46717	0.0136184	0.999981	0.14	0.11	0.16	0	0	0.06	FGF20	chr8	protein_coding	fibroblast growth factor 20
ENSG00000261889.1	41.1195	0.87026	0.35624	2.44291	0.0145695	0.999981	0.71	1.46	1.08	1.79	2.03	2.16	RP11-473M20.16	chr16	lncRNA	--
ENSG00000164638.11	173.426	-0.605932	0.248848	-2.43495	0.0148938	0.999981	1.01	0.66	1.3	0.49	0.82	0.66	SLC29A4	chr7	protein_coding	solute carrier family 29 member 4
ENSG00000278952.1	3.09134	3.94753	1.62602	2.42773	0.0151935	0.999981	0	0	0.04	0.07	0.27	0.26	RP11-399J13.2	chr11	TEC	--
ENSG00000280800.1	32.9601	-0.915955	0.381694	-2.39971	0.016408	0.999981	1.69	1.32	0.91	0.77	0.68	0.65	CH507-513H4.6	chr21	lncRNA	--
ENSG00000260430.2	2.90408	3.85311	1.61423	2.38696	0.0169882	0.999981	0	0	0.03	0.15	0.1	0.17	RP11-626G11.4	chr16	lncRNA	--
ENSG00000206228.4	4.55406	3.67417	1.55591	2.36143	0.0182046	0.999981	0.04	0.03	0	0.83	0	0.14	HNRNPA1P4	chr8	processed_pseudogene	heterogeneous nuclear ribonucleoprotein A1 pseudogene 4
ENSG00000256341.1	9.96658	-1.64689	0.704147	-2.33884	0.0193437	0.999981	0.58	0.72	0.88	0.19	0.33	0.18	RP11-21A7A.3	chr11	lncRNA	--
ENSG00000169469.9	7.39447	1.97208	0.845166	2.33337	0.0196288	0.999981	0.18	0.17	0.05	0.49	0.7	0.42	SPRR1B	chr1	protein_coding	small proline rich protein 1B
ENSG00000260279.4	1.80346	-4.34654	1.88074	-2.31108	0.0208282	0.999981	0.06	0.03	0.07	0	0	0	AC137932.5	chr16	lncRNA	--
ENSG00000226792.7	2.00515	-4.53508	1.97025	-2.30177	0.0213479	0.999981	0.03	0.06	0	0	0	0	C13orf42	chr13	protein_coding	chromosome 13 open reading frame 42
ENSG00000254842.6	2.77371	3.77852	1.64173	2.30156	0.0213603	0.999981	0	0	0.01	0.04	0.08	0.07	LINC02551	chr11	lncRNA	long intergenic non-protein coding RNA 2551
ENSG00000196275.15	62.1262	-0.630665	0.276008	-2.28496	0.0223153	0.999981	0.2	0.25	0.26	0.15	0.15	0.17	GTF2IRD2	chr7	protein_coding	GTF2I repeat domain containing 2
ENSG00000254317.1	8.13446	-1.83721	0.80928	-2.27017	0.0231971	0.999981	0.24	0.31	0.59	0.09	0.15	0.09	RP11-473O4.5	chr8	lncRNA	--
ENSG00000275636.1	11.3372	1.49385	0.664674	2.2475	0.0246082	0.999981	0.37	0.57	0.15	0.96	1.01	1.14	RP11-521C20.5	chr15	lncRNA	--
ENSG00000073067.14	3.57932	3.18228	1.41647	2.24662	0.0246642	0.999981	0.01	0	0.01	0.08	0.08	0.04	CYP2W1	chr7	protein_coding	cytochrome P450 family 2 subfamily W member 1
ENSG00000267232.1	2.54667	-3.82575	1.70943	-2.23803	0.0252188	0.999981	0.29	0.36	0.06	0	0	0.04	CTB-31O20.9	chr19	lncRNA	--
ENSG00000249961.10	1.74581	4.19002	1.8733	2.23671	0.0253055	0.999981	0	0	0	0.03	0.02	0.03	TERB1	chr16	protein_coding	telomere repeat binding bouquet formation protein 1
ENSG00000278189.1	8.87861	-2.20789	0.987954	-2.23481	0.0254298	0.999981	7.1	0.85	0.22	0.72	0.53	0.51	RNA5-8SN1	chr21	rRNA	RNA, 5.8S ribosomal N1
ENSG00000215105.4	6.52418	-2.05804	0.922208	-2.23165	0.0256382	0.999981	0.05	0.07	0.03	0.02	0.01	0	TTC3P1	chrX	processed_pseudogene	tetratricopeptide repeat domain 3 pseudogene 1
ENSG00000197361.8	16.5724	-1.2252	0.549485	-2.22973	0.0257656	0.999981	0.13	0.21	0.2	0.1	0.09	0.04	FBXL22	chr15	protein_coding	F-box and leucine rich repeat protein 22
ENSG00000284052.1	26.5785	0.935732	0.423479	2.20963	0.0271308	0.999981	0.07	0.06	0.06	0.11	0.1	0.16	RP11-284E5.1	chr2	lncRNA	--
ENSG00000143171.13	6.11772	2.07138	0.940751	2.20184	0.0276767	0.999981	0.03	0.03	0.01	0.06	0.14	0.11	RXRG	chr1	protein_coding	retinoid X receptor gamma
ENSG00000101188.5	26.1668	-0.94509	0.429933	-2.19823	0.0279329	0.999981	0.21	0.2	0.27	0.09	0.12	0.15	NTSR1	chr20	protein_coding	neurotensin receptor 1
ENSG00000213062.5	33.4252	0.845507	0.384638	2.19819	0.0279355	0.999981	0.04	0.07	0.04	0.09	0.1	0.08	RP1-206D15.6	chr1	lncRNA	--
ENSG00000167910.4	1.65557	-4.24474	1.93344	-2.19544	0.0281323	0.999981	0.02	0.05	0.02	0	0	0	CYP7A1	chr8	protein_coding	cytochrome P450 family 7 subfamily A member 1
ENSG00000279379.1	3.99044	-2.90389	1.32708	-2.18817	0.0286569	0.999981	1.08	0.2	0.26	0.07	0	0.13	RP11-84N19.1	chr4	TEC	--
ENSG00000262412.1	1.70405	-4.25369	1.9554	-2.17535	0.0296036	0.999981	0.08	0.03	0.17	0	0	0	RP11-85G18.6	chr10	lncRNA	--
ENSG00000224728.1	5.93003	2.0267	0.935999	2.16528	0.0303663	0.999981	0.04	0.07	0.02	0.18	0.2	0.15	IMPDH1P8	chr3	processed_pseudogene	inosine monophosphate dehydrogenase 1 pseudogene 8
ENSG00000145824.13	4.86845	-2.34709	1.09018	-2.15293	0.0313241	0.999981	0.08	0.16	0.1	0	0.04	0.03	CXCL14	chr5	protein_coding	C-X-C motif chemokine ligand 14
ENSG00000204815.10	38.1568	0.757563	0.352257	2.15059	0.0315083	0.999981	0.22	0.23	0.25	0.42	0.31	0.47	ODAD4	chr17	protein_coding	outer dynein arm docking complex subunit 4
ENSG00000121297.8	14.7257	-1.28012	0.596507	-2.14603	0.0318706	0.999981	0.06	0.06	0.09	0.05	0.01	0.03	TSHZ3	chr19	protein_coding	teashirt zinc finger homeobox 3
ENSG00000124575.7	14.1843	-1.33802	0.624309	-2.1432	0.032097	0.999981	0.93	0.47	0.78	0.39	0.39	0.1	H1-3	chr6	protein_coding	H1.3 linker histone, cluster member
ENSG00000260220.7	7.61969	1.78954	0.835073	2.14297	0.0321151	0.999981	0.01	0	0.01	0.04	0.03	0.02	CCDC187	chr9	protein_coding	coiled-coil domain containing 187
ENSG00000235217.6	4.77206	-2.29797	1.07281	-2.14201	0.0321924	0.999981	0.05	0.03	0.07	0.01	0.01	0.01	TSPY26P	chr20	transcribed_processed_pseudogene	testis specific protein Y-linked 26, pseudogene
ENSG00000176771.17	9.22676	-1.5138	0.709719	-2.13296	0.032928	0.999981	0.04	0.04	0.04	0.01	0.02	0.01	NCKAP5	chr2	protein_coding	NCK associated protein 5
ENSG00000147570.10	2.31384	-3.64121	1.71623	-2.12163	0.0338689	0.999981	0.02	0.03	0.05	0.01	0	0	DNAJC5B	chr8	protein_coding	DnaJ heat shock protein family (Hsp40) member C5 beta
ENSG00000164066.13	54.6395	-0.632868	0.298527	-2.11997	0.0340089	0.999981	0.13	0.14	0.08	0.07	0.08	0.07	INTU	chr4	protein_coding	inturned planar cell polarity protein
ENSG00000125409.13	4.35589	2.42916	1.1496	2.11306	0.0345959	0.999981	0.01	0.02	0.01	0.04	0.1	0.09	TEKT3	chr17	protein_coding	tektin 3
ENSG00000185633.10	305.341	-1.37263	0.652446	-2.10382	0.035394	0.999981	4.61	1.89	6.42	1.01	2.58	1.48	NDUFA4L2	chr12	protein_coding	NDUFA4 mitochondrial complex associated like 2
ENSG00000276851.1	20.2345	-1.01382	0.482083	-2.103	0.0354655	0.999981	1.15	1.16	1.56	0.56	0.56	0.8	RP5-875H18.9	chr17	lncRNA	--
ENSG00000255126.1	2.36083	3.56989	1.70201	2.09746	0.035953	0.999981	0	0.04	0	0.19	0.14	0.31	CTD-2531D15.5	chr11	lncRNA	--
ENSG00000232912.6	2.25119	-3.60729	1.72171	-2.09519	0.0361544	0.999981	0.07	0.11	0.11	0.02	0	0	RERE-AS1	chr1	lncRNA	RERE antisense RNA 1
ENSG00000168454.12	2.44529	3.58154	1.71068	2.09363	0.0362928	0.999981	0	0	0.01	0.06	0.03	0.02	TXNDC2	chr18	protein_coding	thioredoxin domain containing 2
ENSG00000089169.15	4.18168	-2.47802	1.18594	-2.0895	0.0366631	0.999981	0.03	0.02	0.01	0	0.01	0.01	RPH3A	chr12	protein_coding	rabphilin 3A
ENSG00000005102.14	1.81807	-4.34002	2.07764	-2.08892	0.036715	0.999981	0.02	0	0.09	0	0	0	MEOX1	chr17	protein_coding	mesenchyme homeobox 1
ENSG00000258458.8	5.26608	2.07979	0.995853	2.08845	0.0367571	0.999981	0.02	0.02	0.01	0.07	0.06	0.1	CTD-2555K7.2	chr14	lncRNA	--
ENSG00000147378.11	1.61817	4.07606	1.95402	2.08599	0.0369797	0.999981	0	0	0	0.05	0.15	0.05	FATE1	chrX	protein_coding	fetal and adult testis expressed 1
ENSG00000120952.4	2.37752	3.57269	1.7195	2.07774	0.0377332	0.999981	0.02	0	0	0.03	0.07	0.13	PRAMEF2	chr1	protein_coding	PRAME family member 2
ENSG00000135205.15	10.0369	1.41676	0.682774	2.07501	0.0379857	0.999981	0.04	0.03	0.03	0.08	0.09	0.11	CCDC146	chr7	protein_coding	coiled-coil domain containing 146
ENSG00000273402.1	1.5048	-4.10454	1.98292	-2.06994	0.0384576	0.999981	0.09	0.21	0.11	0	0	0	RP5-855D21.2	chr8	lncRNA	--
ENSG00000280239.1	32.3982	0.779365	0.377283	2.06573	0.0388536	0.999981	0.27	0.41	0.3	0.62	0.5	0.59	CTB-50L17.8	chr19	TEC	--
ENSG00000144550.13	2.3858	3.5772	1.73175	2.06566	0.0388605	0.999981	0.01	0	0	0.11	0.04	0.02	CPNE9	chr3	protein_coding	copine family member 9
ENSG00000108813.11	17.2988	-1.06484	0.516057	-2.06341	0.0390732	0.999981	0.21	0.14	0.19	0.08	0.09	0.09	DLX4	chr17	protein_coding	distal-less homeobox 4
ENSG00000234665.9	3.97145	2.6542	1.28657	2.063	0.0391123	0.999981	0	0	0.01	0.02	0.05	0.02	LERFS	chr9	lncRNA	lncRNA negative regulator of fibroblast-like synoviocyte migration, SYNCRIP interacting
ENSG00000232040.4	38.7059	0.715774	0.347915	2.05732	0.0396552	0.999981	0.11	0.1	0.1	0.21	0.15	0.14	ZBED9	chr6	protein_coding	zinc finger BED-type containing 9
ENSG00000260394.2	1.6263	4.08243	1.99156	2.04987	0.0403776	0.999981	0	0	0	0.02	0.15	0.04	LINC02867	chr16	lncRNA	--
ENSG00000169067.4	25.0995	-0.870323	0.424893	-2.04833	0.0405274	0.999981	0.31	0.4	0.27	0.21	0.16	0.18	ACTBL2	chr5	protein_coding	actin beta like 2
ENSG00000224525.2	2.50492	3.61381	1.777	2.03366	0.0419861	0.999981	0	0	0.04	0.07	0.39	0.03	RP11-561I11.3	chr1	lncRNA	--
ENSG00000186676.3	5.69219	-2.00194	0.984744	-2.03296	0.042057	0.999981	0.19	0.1	0.29	0.04	0.08	0.02	EEF1GP1	chr7	processed_pseudogene	eukaryotic translation elongation factor 1 gamma pseudogene 1
ENSG00000273032.3	11.5426	-1.28188	0.634002	-2.02188	0.0431886	0.999981	0.03	0.04	0.04	0.02	0.02	0.01	DGCR5	chr22	lncRNA	DiGeorge syndrome critical region gene 5
ENSG00000225595.2	1.5307	-4.09576	2.02593	-2.02167	0.0432103	0.999981	0.01	0.02	0.05	0	0	0	LINC01623	chr6	lncRNA	long intergenic non-protein coding RNA 1623
ENSG00000227748.2	1.57754	4.0451	2.00337	2.01915	0.0434718	0.999981	0	0	0	0.15	0.02	0.04	RP11-497D6.3	chr6	lncRNA	--
ENSG00000278982.1	2.23371	3.47413	1.72278	2.01658	0.0437395	0.999981	0.01	0	0	0.09	0.06	0.04	RP5-1031D4.3	chr10	TEC	--
ENSG00000162639.16	2.97403	-3.0841	1.52959	-2.01629	0.0437694	0.999981	0.13	0.03	0.03	0.01	0	0.01	HENMT1	chr1	protein_coding	HEN methyltransferase 1
ENSG00000276107.1	2.2468	3.48794	1.73262	2.0131	0.0441041	0.999981	0	0.04	0	0.11	0.26	0.11	THBS1-IT1	chr15	lncRNA	THBS1 intronic transcript 1
ENSG00000223561.7	1.56386	4.03436	2.0068	2.01034	0.0443947	0.999981	0	0	0	0.01	0	0.02	AC003090.1	chr7	lncRNA	--
ENSG00000276272.1	6.59166	-1.82739	0.910981	-2.00595	0.0448612	0.999981	0.33	0.17	0.19	0.02	0.13	0.04	RP11-121C6.5	chr12	lncRNA	--
ENSG00000203872.7	3.38473	-2.62576	1.31098	-2.00291	0.0451874	0.999981	0.06	0.09	0.02	0.01	0.01	0.01	C6orf163	chr6	protein_coding	chromosome 6 open reading frame 163
ENSG00000184497.13	9.27442	1.44721	0.722609	2.00275	0.045204	0.999981	0.02	0.03	0.01	0.05	0.05	0.06	TMEM255B	chr13	protein_coding	transmembrane protein 255B
ENSG00000231210.3	7.57211	-1.56841	0.784372	-1.99958	0.0455461	0.999981	0.18	0.2	0.18	0.05	0.06	0.08	COMETT	chr7	lncRNA	cytosolic oncogenic antisense to MET transcript
ENSG00000267221.3	14.8117	-1.12374	0.562703	-1.99705	0.0458201	0.999981	0.15	0.13	0.17	0.06	0.09	0.06	C17orf113	chr17	protein_coding	chromosome 17 open reading frame 113
ENSG00000287265.1	3.93958	2.69255	1.34972	1.99489	0.0460546	0.999981	0.02	0	0.01	0.06	0.09	0.01	RP11-328C17.2	chr6	lncRNA	--
ENSG00000272662.1	5.42634	-1.94664	0.976416	-1.99365	0.0461898	0.999981	0.39	0.36	0.67	0.16	0.05	0.16	TIMMDC1-DT	chr3	lncRNA	TIMMDC1 divergent transcript
ENSG00000082397.18	1.46805	-4.04472	2.02909	-1.99336	0.0462215	0.999981	0	0.01	0.01	0	0	0	EPB41L3	chr18	protein_coding	erythrocyte membrane protein band 4.1 like 3
ENSG00000212993.5	3.02837	3.00034	1.50695	1.991	0.0464812	0.999981	0.01	0	0	0.04	0.03	0.03	POU5F1B	chr8	protein_coding	POU class 5 homeobox 1B
ENSG00000172349.18	5.49684	-1.96386	0.988185	-1.98734	0.0468843	0.999981	0.01	0.03	0.03	0	0.01	0.01	IL16	chr15	protein_coding	interleukin 16
ENSG00000254231.3	3.52346	2.62218	1.32268	1.98247	0.0474269	0.999981	0.01	0.01	0	0.02	0.05	0.02	CTD-2284J15.1	chr8	lncRNA	--
ENSG00000268941.2	4.87545	-2.02356	1.02363	-1.97684	0.0480595	0.999981	0.26	0.13	0.28	0.06	0.06	0.05	LINC01711	chr20	lncRNA	long intergenic non-protein coding RNA 1711
ENSG00000139985.8	2.85494	-2.96714	1.50295	-1.9742	0.0483587	0.999981	0.03	0.03	0.06	0.01	0.01	0	ADAM21	chr14	protein_coding	ADAM metallopeptidase domain 21
ENSG00000120156.22	3.61593	2.6741	1.35514	1.9733	0.0484612	0.999981	0.01	0.01	0	0.07	0.01	0.03	TEK	chr9	protein_coding	TEK receptor tyrosine kinase
ENSG00000163132.8	64.4982	0.630591	0.320361	1.96838	0.0490248	0.999981	0.71	0.73	0.56	1.63	0.78	0.74	MSX1	chr4	protein_coding	msh homeobox 1
ENSG00000163357.11	8.17834	1.58521	0.806432	1.96571	0.0493322	0.999981	0.03	0.04	0.03	0.08	0.06	0.19	DCST1	chr1	protein_coding	DC-STAMP domain containing 1
ENSG00000134258.17	15.536	1.17705	0.599501	1.96339	0.0496014	0.999981	0.15	0.09	0.02	0.24	0.22	0.15	VTCN1	chr1	protein_coding	V-set domain containing T cell activation inhibitor 1
