# Supplementary material for: SK4 potentially modulates the alternative splicing profile associated with papillary thyroid cancer development in BHT101 cells
Source: PeerJ journal article supplement (doi:10.7717/peerj.19391), 2025-05-28
Supplement: TableS5.xlsx [file TableS5.xlsx]

## Sheet: Classification_of_all_the_detec
Table S5 Classification of all the detected AS events.
#Sample	3pMXE	5pMXE	A3SS	A3SS&ES	A5SS	A5SS&ES	ES	MXE	cassetteExon	Total	Detected junction	AS/100SJ
NC_1	3560	3983	14059	1823	11973	2059	5450	1294	4583	48784	211511	23.06
NC_2	3743	4163	14798	1915	12657	2077	5543	1382	4766	51044	218296	23.38
NC_3	3198	3517	12274	1644	10460	1849	4798	1078	3976	42794	195253	21.92
SK4-OE_1	3529	3915	14479	1840	12152	2049	5475	1324	4588	49351	215351	22.92
SK4-OE_2	3549	3918	14132	1897	12153	2087	5393	1258	4551	48938	208537	23.47
SK4-OE_3	3715	4148	14705	1854	12541	2106	5549	1401	4689	50708	215821	23.5
Total	8847	10023	38796	5154	31349	5063	10640	3059	9011	121942	430880	28.3
