# Supplementary material for: SK4 potentially modulates the alternative splicing profile associated with papillary thyroid cancer development in BHT101 cells
Source: PeerJ journal article supplement (doi:10.7717/peerj.19391), 2025-05-28
Supplement: TableS6.xlsx [file TableS6.xlsx]

## Sheet: OE_SK4_vs_NC_NIR_RAS_p0.05
Table S6 The RASEs between SK4-OE vs. NC samples.
X.ID	Chr	Ass1	Ass2	Strand	Mss1	Mss2	Type	Isoform	KorN	NC_1.Ratio	NC_1.Alt_average_sj	NC_1.Model_average_sj	NC_1.Alt_sj	NC_1.Model_sj	NC_1.isfiltered	NC_2.Ratio	NC_2.Alt_average_sj	NC_2.Model_average_sj	NC_2.Alt_sj	NC_2.Model_sj	NC_2.isfiltered	NC_3.Ratio	NC_3.Alt_average_sj	NC_3.Model_average_sj	NC_3.Alt_sj	NC_3.Model_sj	NC_3.isfiltered	OE_SK4_1.Ratio	OE_SK4_1.Alt_average_sj	OE_SK4_1.Model_average_sj	OE_SK4_1.Alt_sj	OE_SK4_1.Model_sj	OE_SK4_1.isfiltered	OE_SK4_2.Ratio	OE_SK4_2.Alt_average_sj	OE_SK4_2.Model_average_sj	OE_SK4_2.Alt_sj	OE_SK4_2.Model_sj	OE_SK4_2.isfiltered	OE_SK4_3.Ratio	OE_SK4_3.Alt_average_sj	OE_SK4_3.Model_average_sj	OE_SK4_3.Alt_sj	OE_SK4_3.Model_sj	OE_SK4_3.isfiltered	Pvalue	Tvalue	DiffType	Gene
novel_NIR_15451	chr12	52905045	52949456	-	52905027	52949456	A3SS	ENST00000552551.5	novel	0.02	1	52	1	52	n	0	0	23	0	23	n	0	0	7	0	7	n	0.85	274	50	274	50	y	0.89	322	39	322	39	y	0.87	202	29	202	29	y	4.24405e-06	64.75	up	ENSG00000170421.12
known_NIR_28730	chr19	48474949	48477717	+	48474949	48478066	A3SS	ENST00000427476.4	known	0.95	176	10	176	10	y	0.96	149	6	149	6	y	0.93	170	13	170	13	y	0	0	8	0	8	n	0	0	8	0	8	n	0	0	1	0	1	n	8.6777e-05	-107.342	down	ENSG00000105443.15
novel_NIR_56854	chr7	100097743	100097834	-	100093116	100097834	A3SS	ENST00000343023.10	novel	0.03	5	138	5	138	n	0	0	159	0	159	n	0	0	112	0	112	n	-	-	-	-	-	-	1	2	0	2	0	y	1	12	0	12	0	y	0.000102015	99	up	ENSG00000166508.18
known_NIR_5754	chr10	35195214	35206895	+	35195214;35201486	35201451;35206895	ES	ENST00000487763.5	known	0.73	8	3	8	2;4	y	0.65	12	6.5	12	0;13	n	0.73	12	4.5	12	0;9	n	0.1	1	9	1	2;16	n	0	0	3	0	2;4	n	0	0	2	0	0;4	n	0.000131517	-15.6955	down	ENSG00000095794.19
known_NIR_19785	chr16	57452936;57456646	57456504;57458246	+	57452936	57458246	cassetteExon	ENST00000565964.5	known	0.93	130.5	10	259;2	10	y	0.93	185.5	15	369;2	15	y	0.94	123.5	8	245;2	8	y	0.99	160	2	318;2	2	y	1	141.5	0	283;0	0	n	0.99	146.5	2	292;1	2	n	0.000219511	12.7279	up	ENSG00000088682.14
novel_NIR_20336	chr15	101966223	101972901	+	101966223;101972694	101972583;101972901	ES	ENST00000557932.5	novel	0.19	17	71.5	17	71;72	y	0.2	18	74	18	81;67	y	0.19	12	51	12	56;46	y	0.14	13	77.5	13	80;75	n	0.13	11	74	11	75;73	n	0.13	16	107	16	114;100	n	0.000219511	-12.7279	down	ENSG00000185596.16
known_NIR_19890	chr16	58555908	58556862	-	58555908	58556847	A5SS	ENST00000317147.10	known	0.21	6	22	6	22	y	0.21	3	11	3	11	y	0.22	2	7	2	7	n	0	0	26	0	26	n	0	0	12	0	12	n	0	0	6	0	6	n	0.000244051	-64	down	ENSG00000125107.19
novel_NIR_34495	chr19	49172108	49173698	+	49172108	49181349	A3SS	ENST00000252826.10	novel	0.4	4	6	4	6	y	0.42	5	7	5	7	y	0.4	2	3	2	3	y	0	0	6	0	6	n	0	0	5	0	5	n	0	0	4	0	4	n	0.000268637	-61	down	ENSG00000130529.16
known_NIR_42600	chr5	40771863;40774972	40774928;40775410	-	40771863	40775410	cassetteExon	ENST00000397128.6	known	0	0	14	0;0	14	n	0.03	0.5	15	1;0	15	n	0	0	14	0;0	14	n	0.17	4	19	4;4	19	y	0.2	2.5	10	2;3	10	y	0.17	1	5	1;1	5	n	0.000274562	12.0208	up	ENSG00000132356.11
known_NIR_46392	chr7	1569360	1570474	-	1569360	1570009	5pMXE	ENST00000404674.7	known	0.27	34	91	34	91	y	0.25	27	81	27	81	y	0.26	30	86	30	86	y	0.36	47	83	47	83	y	0.35	38	71	38	71	y	0.34	61	118	61	118	y	0.000385068	11.0227	up	ENSG00000157778.9
novel_NIR_60695	chr7	74188474	74189673	+	74174442	74189673	A5SS	ENST00000677570.1	novel	0	0	14	0	14	n	-	-	-	-	-	-	0	0	7	0	7	n	0.33	1	2	1	2	n	0.31	4	9	4	9	y	0.33	2	4	2	4	y	0.000424854	48.5	up	ENSG00000106682.16
known_NIR_8444	chr11	62534074	62535003	-	62433891	62535003	A3SS	ENST00000530124.5	known	0.85	29	5	29	5	y	0.89	31	4	31	4	y	0.91	10	1	10	1	n	0.64	18	10	18	10	y	0.58	22	16	22	16	y	0.58	11	8	11	8	y	0.000481679	-10.625	down	ENSG00000124942.14
known_NIR_7330	chr11	18400745	18400837	+	18396968	18400837	A5SS	ENST00000545215.5	known	0.81	52	12	52	12	y	0.86	42	7	42	7	y	0.8	36	9	36	9	y	0	0	7	0	7	n	0	0	4	0	4	n	0	0	4	0	4	n	0.000507735	-44.3625	down	ENSG00000134333.14
known_NIR_52551	chrX	48511935	48514240	+	48512719	48514240	A5SS&ES	ENST00000491243.5	known	0.02	1	43	1	43	n	0	0	58	0	58	n	0	0	30	0	30	n	0.11	4	34	4	34	y	0.11	6	51	6	51	y	0.09	4	39	4	39	y	0.000510138	10.253	up	ENSG00000102312.24
novel_NIR_4642	chr1	33334292	33349053	-	33334292	33354401	A5SS	ENST00000431992.5	novel	0.43	3	4	3	4	y	0.4	4	6	4	6	y	0.38	3	5	3	5	y	0.64	18	10	18	10	y	0.7	7	3	7	3	y	0.65	11	6	11	6	y	0.000516549	11.0309	up	ENSG00000134686.19
known_NIR_21877	chr17	29793937;29848929	29848849;29929938	-	29793937	29929938	cassetteExon	ENST00000269033.7	known	0.73	8	3	9;7	3	y	0.71	5	2	2;8	2	y	0.71	5	2	5;5	2	y	1	2	0	2;2	0	n	1	3	0	3;3	0	n	1	6	0	6;6	0	n	0.000553174	42.5	up	ENSG00000141298.19
known_NIR_13786	chr13	102667883	102674283	+	102664925	102674283	A5SS	ENST00000376052.5	known	0.05	5	96	5	96	y	0.05	6	125	6	125	y	0.04	3	71	3	71	y	0.1	12	113	12	113	y	0.09	10	102	10	102	y	0.09	11	118	11	118	y	0.000584411	9.89949	up	ENSG00000134900.12
novel_NIR_52263	chr5	177331929	177334284	-	177332269	177334284	3pMXE	ENST00000515209.5	novel	0.7	101	44	101	44	y	0.73	102	38	102	38	y	0.67	50	25	50	25	y	0	0	45	0	45	n	0	0	41	0	41	n	0	0	57	0	57	n	0.000611683	-40.4145	down	ENSG00000169223.15
known_NIR_43980	chr6	30557450;30561508	30561328;30561834	+	30557450	30561834	cassetteExon	ENST00000376557.3	known	0.27	19	52	17;21	52	y	0.3	16.5	39	19;14	39	y	0.31	17	38	18;16	38	y	0.45	35	42	33;37	42	y	0.45	19	23	20;18	23	y	0.42	28.5	40	27;30	40	y	0.000839228	9.38083	up	ENSG00000204576.12
known_NIR_39128	chr3	56567053	56569313	+	56567053	56571181	A3SS	ENST00000422222.5	known	0.64	7	4	7	4	y	0.67	2	1	2	1	n	0.67	2	1	2	1	n	1	5	0	5	0	n	1	4	0	4	0	n	1	2	0	2	0	n	0.000863931	34	up	ENSG00000180376.17
novel_NIR_18223	chr14	103677523	103679408	+	103677523	103679309	A3SS	ENST00000380038.7	novel	0.38	19	31	19	31	y	0.42	15	21	15	21	y	0.44	8	10	8	10	y	0.65	20	11	20	11	y	0.7	28	12	28	12	y	0.63	34	20	34	20	y	0.000937559	9.04054	up	ENSG00000126214.21
known_NIR_21874	chr17	29674159	29676820	-	29672129	29676820	A3SS	ENST00000269033.7	known	1	14	0	14	0	n	0.95	21	1	21	1	n	1	9	0	9	0	n	0.71	15	6	15	6	y	0.75	15	5	15	5	y	0.67	10	5	10	5	y	0.00103163	-9.59737	down	ENSG00000141298.19
known_NIR_564	chr1	1435821	1436807	+	1435821	1437322	A3SS	ENST00000338660.5	known	0	0	37	0	37	n	0	0	13	0	13	n	0	0	15	0	15	n	0.1	2	18	2	18	y	0.1	2	18	2	18	y	0.11	2	17	2	17	y	0.00103896	31	up	ENSG00000179403.12
novel_NIR_9747	chr11	126294602	126304188	-	126294602	126304208	A5SS	ENST00000524964.1	novel	0	0	11	0	11	n	0	0	10	0	10	n	0	0	11	0	11	n	0.44	4	5	4	5	y	0.4	4	6	4	6	y	0.4	2	3	2	3	y	0.00103896	31	up	ENSG00000255062.1
known_NIR_32352	chr2	58146474	58154754	+	58146474	58154759	A3SS	ENST00000648897.1	known	0.34	13	25	13	25	y	0.42	13	18	13	18	y	0.36	5	9	5	9	y	0.69	20	9	20	9	y	0.8	20	5	20	5	y	0.74	26	9	26	9	y	0.00104593	9.28229	up	ENSG00000028116.18
known_NIR_8998	chr11	66257871	66258547	+	66257730	66258547	A5SS	ENST00000526758.5	known	0.91	52	5	52	5	y	0.91	31	3	31	3	y	0.9	18	2	18	2	y	0.95	56	3	56	3	y	0.94	32	2	32	2	y	0.95	39	2	39	2	y	0.00105756	8.48528	up	ENSG00000174996.12
known_NIR_2318	chr1	211396831	211399377	+	211396831	211398036	3pMXE	ENST00000664255.1	known	0.05	2	37	2	37	y	0.07	3	38	3	38	y	0.02	1	51	1	51	n	0.24	10	32	10	32	y	0.3	12	28	12	28	y	0.3	11	26	11	26	y	0.00107715	9.4388	up	ENSG00000153363.13
known_NIR_38316	chr3	44651259	44658701	+	44651259	44652557	3pMXE	ENST00000432115.6	known	0.75	9	3	9	3	y	0.8	4	1	4	1	n	0.85	11	2	11	2	y	0.25	2	6	2	6	n	0.25	2	6	2	6	n	0.38	3	5	3	5	n	0.00120193	-9.7308	down	ENSG00000169981.11
known_NIR_11229	chr12	132085316	132103997	+	132085316;132090943	132090849;132103997	ES	ENST00000443539.6	known	0.35	4	7.5	4	6;9	y	0.41	7	10	7	10;10	y	0.47	4	4.5	4	0;9	n	0.09	1	10	1	3;17	n	0	0	16	0	19;13	n	0	0	11.5	0	10;13	n	0.00125965	-8.29228	down	ENSG00000185684.15
known_NIR_20405	chr16	70523928	70526587	+	70525017	70526587	5pMXE	ENST00000564899.1	known	1	47	0	47	0	n	1	85	0	85	0	n	0.96	47	2	47	2	y	0.83	30	6	30	6	y	0.86	55	9	55	9	y	0.83	49	10	49	10	y	0.00128752	-8.8	down	ENSG00000189091.13
known_NIR_16397	chr14	91114994;91145313	91145221;91157639	+	91114994	91157639	cassetteExon	ENST00000523894.5	known	0.6	6	4	2;10	4	y	0.65	5.5	3	3;8	3	y	0.69	9	4	6;12	4	y	0.33	4	8	0;8	8	n	0.21	5	19	10;0	19	n	0.25	2	6	0;4	6	n	0.00136323	-8.74329	down	ENSG00000133943.21
known_NIR_35014	chr21	43882615	43903957	+	43867346	43903957	A5SS	ENST00000448287.5	known	1	2	0	2	0	n	1	4	0	4	0	n	0.89	16	2	16	2	y	-	-	-	-	-	-	0	0	2	0	2	n	0	0	2	0	2	n	0.0014456	-26.2727	down	ENSG00000160216.21
known_NIR_17255	chr15	60386086;60396427	60396151;60397943	-	60386086;60397338	60393013;60397943	MXE	ENST00000678450.1	known	0.09	19.5	196.5	33;6	1;392	n	0.1	23.5	213	39;8	6;420	y	0.09	14.5	150	26;3	5;295	y	0.05	10	199.5	18;2	28;371	y	0.06	14.5	218	25;4	6;430	y	0.06	15.5	227	26;5	17;437	y	0.00147312	-7.77817	down	ENSG00000182718.18
known_NIR_24178	chr17	76089320	76094414	-	76089320;76091235	76091143;76094414	ES	ENST00000589210.6	known	1	137	0.5	137	0;1	n	0.99	183	2	183	0;4	n	0.99	89	1	89	0;2	n	0.95	127	6	127	0;12	n	0.96	129	5	129	8;2	y	0.96	100	4.5	100	6;3	y	0.00147312	-7.77817	down	ENSG00000182473.22
novel_NIR_61950	chr8	123448224	123465983	+	123448224	123467079	A3SS	ENST00000523551.1	novel	0	0	1	0	1	n	0	0	10	0	10	n	0	0	4	0	4	n	0.56	5	4	5	4	y	0.5	2	2	2	2	y	0.5	4	4	4	4	y	0.00147602	26	up	ENSG00000156795.8
known_NIR_2490	chr1	222815171;222827601	222827428;222835119	+	222815171	222835119	cassetteExon	ENST00000661663.1	known	0.62	11.5	7	0;23	7	n	0.61	21.5	14	0;43	14	n	0.65	11	6	0;22	6	n	0.86	25	4	3;47	4	y	0.86	24	4	0;48	4	n	0.85	16.5	3	0;33	3	n	0.00148478	18.441	up	ENSG00000154309.9
novel_NIR_15119	chr12	48774518	48775303	-	48774518	48774691	5pMXE	ENST00000552099.5	novel	0.44	8	10	8	10	y	0.53	8	7	8	7	y	0.4	2	3	2	3	y	0	0	7	0	7	n	0	0	10	0	10	n	0.07	2	25	2	25	n	0.00158482	-9.63624	down	ENSG00000174233.12
known_NIR_4424	chr1	54047372;54048682	54048650;54053356	-	54047372	54053356	cassetteExon	ENST00000371341.5	known	0	0	24	0;0	24	n	0	0	32	0;0	32	n	0	0	18	0;0	18	n	0.08	2	24	2;2	24	y	0.09	2	20	4;0	20	n	0.08	3	33	6;0	33	n	0.00159617	25	up	ENSG00000116209.12
known_NIR_38881	chr3	50349828	50349931	-	50349833	50349931	A3SS	ENST00000232501.8	known	0.23	32	107	32	107	y	0.22	37	132	37	132	y	0.23	31	103	31	103	y	0.17	21	101	21	101	y	0.15	20	112	20	112	y	0.16	23	119	23	119	y	0.00160873	-10	down	ENSG00000114388.14
known_NIR_10447	chr12	110614463	110626362	+	110614402	110626362	A5SS	ENST00000552318.5	known	0.36	5	9	5	9	y	0.38	5	8	5	8	y	0.33	2	4	2	4	n	0	0	8	0	8	n	0	0	3	0	3	n	-	-	-	-	-	-	0.00165541	-24.5475	down	ENSG00000204852.17
known_NIR_52552	chrX	48511935;48512719	48512326;48514240	+	48511935	48514240	cassetteExon	ENST00000472520.5	known	0.99	70	1	97;43	1	n	1	55.5	0	53;58	0	n	1	43.5	0	57;30	0	n	0.92	47	4	60;34	4	y	0.9	52	6	53;51	6	y	0.92	44.5	4	50;39	4	y	0.00167824	-11.1803	down	ENSG00000102312.24
novel_NIR_22865	chr16	18375069	18376953	-	18375069	18376736	5pMXE	ENST00000427999.6	novel	0	0	7	0	7	n	0	0	21	0	21	n	0	0	16	0	16	n	0.38	10	16	10	16	y	0.33	4	8	4	8	y	0.35	6	11	6	11	y	0.00168672	24.3181	up	ENSG00000233024.7
known_NIR_37949	chr3	197945686	197959529	-	197945686	197949839	5pMXE	ENST00000455191.5	known	0.12	2	14	2	14	y	0	0	9	0	9	n	0	0	1	0	1	n	1	3	0	3	0	n	1	3	0	3	0	n	-	-	-	-	-	-	0.0017316	24	up	ENSG00000114473.14
novel_NIR_52023	chr5	1574295;1575671	1575599;1576179	-	1574295	1576179	cassetteExon	ENST00000652578.1	novel	0	0	6	0;0	6	n	-	-	-	-	-	-	0	0	6	0;0	6	n	0.22	2	7	2;2	7	y	0.25	2	6	2;2	6	y	0.25	3	9	4;2	9	y	0.0017316	24	up	ENSG00000185986.12
novel_NIR_66516	chr9	65703014	65703627	+	65703014	65704331	A3SS	ENST00000377392.9	novel	1	2	0	2	0	y	1	5	0	5	0	y	1	2	0	2	0	y	0.12	1	7	1	7	n	0	0	4	0	4	n	0	0	4	0	4	n	0.0017316	-24	down	ENSG00000147996.17
novel_NIR_2830	chr1	202966012	202966749	-	202965993	202966749	A3SS	ENST00000482572.5	novel	0.33	1	2	1	2	n	0.29	2	5	2	5	y	0.33	1	2	1	2	n	-	-	-	-	-	-	0	0	3	0	3	n	0	0	9	0	9	n	0.00176815	-23.75	down	ENSG00000159348.13
novel_NIR_9762	chr11	126409411	126413508	+	126409411	126440186	A3SS	ENST00000524834.5	novel	0.87	13	2	13	2	y	1	3	0	3	0	y	1	1	0	1	0	n	0.17	1	5	1	5	n	0	0	5	0	5	n	0.25	2	6	2	6	y	0.00177176	-9.55109	down	ENSG00000110080.20
novel_NIR_32623	chr19	2328775	2338752	+	2328775	2334602	A3SS&ES	ENST00000621568.4	novel	0.07	1	13	1	13	n	0.04	1	23	1	23	n	0	0	18	0	18	n	0.26	5	14	5	14	y	0.21	4	15	4	15	y	0.25	4	12	4	12	y	0.00178364	8.00969	up	ENSG00000005206.17
known_NIR_5212	chr10	110298790	110303468	-	110300736	110303468	A3SS&ES	ENST00000471297.1	known	0.97	91	3	91	3	y	0.97	73	2	73	2	y	0.97	65	2	65	2	y	0.9	73	8	73	8	y	0.89	64	8	64	8	y	0.89	85	11	85	11	y	0.00188502	-23	down	ENSG00000119953.14
known_NIR_19784	chr16	57452936;57456626	57456504;57458246	+	57452936	57458246	cassetteExon	ENST00000565964.5	known	0.93	129.5	10	259;0	10	n	0.92	184.5	15	369;0	15	n	0.94	122.5	8	245;0	8	n	0.99	160	2	318;2	2	y	1	141.5	0	283;0	0	n	0.99	146	2	292;0	2	n	0.0018875	9.5	up	ENSG00000088682.14
known_NIR_30716	chr2	191010004;191010449	191010367;191013525	-	191010004	191013525	cassetteExon	ENST00000673816.1	known	0.06	4	65	5;3	65	y	0.06	3	47	3;3	47	y	0.04	2.5	54	4;1	54	n	0.14	10	61	14;6	61	y	0.13	5	34	8;2	34	y	0.13	9.5	64	10;9	64	y	0.001888	10.7331	up	ENSG00000115415.20
known_NIR_48857	chr8	143567465	143567786	-	143567465;143567676	143567611;143567786	ES	ENST00000533210.5	known	0.4	2	3	2	2;4	n	0.38	6	10	6	11;9	y	0.44	2	2.5	2	4;1	n	0.17	2	10	2	7;13	y	0.14	2	12	2	11;13	y	0.22	2	7	2	3;11	y	0.0018921	-7.86328	down	ENSG00000204839.9
known_NIR_17003	chr15	49137458	49139528	-	49137437	49139528	A3SS	ENST00000388901.10	known	0.27	9	24	9	24	y	0.24	10	31	10	31	y	0.19	3	13	3	13	y	0.51	30	29	30	29	y	0.48	16	17	16	17	y	0.43	29	38	29	38	y	0.00189859	7.2731	up	ENSG00000166200.15
novel_NIR_60883	chr7	7673453	7720913	+	7673453	7676102	A3SS&ES	ENST00000463725.5	novel	0	0	5	0	5	n	0	0	3	0	3	n	0	0	1	0	1	n	0.29	2	5	2	5	y	0.29	2	5	2	5	y	0.33	2	4	2	4	y	0.00192655	22.75	up	ENSG00000219545.12
novel_NIR_40587	chr20	3110309	3115305	-	3110314	3115305	A3SS	ENST00000217173.7	novel	0.03	1	31	1	31	n	0.03	1	31	1	31	n	0	0	11	0	11	n	0.17	3	15	3	15	y	0.18	6	27	6	27	y	0.17	7	33	7	33	y	0.0019788	14.5465	up	ENSG00000185019.17
known_NIR_27093	chr19	19199234	19200819	+	19199234	19201657	A3SS	ENST00000544923.5	known	1	4	0	4	0	n	1	3	0	3	0	n	1	3	0	3	0	n	0.29	13	32	13	32	y	0.36	17	30	17	30	y	0.39	13	20	13	20	y	0.00205011	-22.0517	down	ENSG00000064490.14
known_NIR_29331	chr19	54990393	54990502	+	54990192	54990502	A5SS	ENST00000543010.5	known	0	0	39	0	39	n	0	0	77	0	77	n	0	0	65	0	65	n	0.08	6	73	6	73	y	0.07	4	56	4	56	y	0.07	3	40	3	40	y	0.00205973	22	up	ENSG00000022556.16
novel_NIR_52904	chr5	40843709	40844895	+	40843709	40852174	A3SS	ENST00000254691.10	novel	0	0	6	0	6	n	0.06	1	15	1	15	n	0	0	3	0	3	n	0.25	1	3	1	3	n	0.25	1	3	1	3	n	0.33	3	6	3	6	y	0.00206825	7.7	up	ENSG00000132357.14
known_NIR_29095	chr19	49909884	49918508	-	49909884	49929326	A5SS	ENST00000422090.2	known	0	0	102	0	102	n	0.01	1	98	1	98	n	0	0	56	0	56	n	0.03	2	76	2	76	y	0.04	4	88	4	88	y	0.04	4	110	4	110	y	0.00211065	7.07107	up	ENSG00000213024.12
known_NIR_25534	chr18	35480563	35497719	-	35478349	35497719	A3SS	ENST00000587450.1	known	0.93	176	14	176	14	y	0.92	209	18	209	18	y	0.92	157	13	157	13	y	0.95	205	10	205	10	y	0.96	202	8	202	8	y	0.96	237	11	237	11	y	0.00211065	7.07107	up	ENSG00000153391.16
novel_NIR_17090	chr13	110696217	110701438	-	110697967	110701438	A3SS&ES	ENST00000465145.5	novel	0.87	13	2	13	2	y	0.91	10	1	10	1	y	0.79	11	3	11	3	y	0.43	6	8	6	8	y	0.4	2	3	2	3	y	0.38	6	10	6	10	y	0.00222431	-11.8824	down	ENSG00000134905.17
known_NIR_15312	chr14	24440926	24442346	-	24440926;24442260	24442109;24442346	ES	ENST00000553343.5	known	0.18	23	102	23	0;204	n	0.21	23	85.5	23	2;169	y	0.17	14	67	14	4;130	y	0.31	36	80.5	36	2;159	y	0.32	35	75.5	35	5;146	y	0.28	41	105	41	0;210	n	0.00235909	6.86406	up	ENSG00000100445.18
novel_NIR_682	chr1	1267992	1273051	-	1267992	1273377	A5SS	ENST00000435198.5	novel	0.86	6	1	6	1	y	1	7	0	7	0	y	1	2	0	2	0	y	0	0	6	0	6	n	-	-	-	-	-	-	0	0	3	0	3	n	0.00238763	-20.4286	down	ENSG00000160087.21
novel_NIR_37810	chr2	228488793	228527225	-	228488793	228506327	A5SS&ES	ENST00000432481.2	novel	1	4	0	4	0	y	-	-	-	-	-	-	1	2	0	2	0	y	0	0	8	0	8	n	0.14	1	6	1	6	n	0	0	5	0	5	n	0.00238763	-20.4286	down	ENSG00000232023.3
known_NIR_13562	chr12	79688465	79689729	-	79668408	79689729	A3SS	ENST00000547571.1	known	0.19	3	13	3	13	y	0.33	3	6	3	6	n	0.2	1	4	1	4	n	0.78	7	2	7	2	n	1	4	0	4	0	n	0.83	10	2	10	2	y	0.00240063	7.8343	up	ENSG00000177425.11
known_NIR_48498	chr8	127989291	127994883	+	127989291	128070160	A3SS	ENST00000653522.1	known	0.67	33	16	33	16	y	0.65	34	18	34	18	y	0.73	24	9	24	9	y	0.45	21	26	21	26	y	0.44	17	22	17	22	y	0.5	20	20	20	20	y	0.00243806	-7.24444	down	ENSG00000249859.12
novel_NIR_12964	chr12	10710114	10710780	-	10710114	10710534	5pMXE	ENST00000544504.5	novel	0.62	8	5	8	5	y	0.59	10	7	10	7	y	0.57	16	12	16	12	y	0.37	7	12	7	12	y	0.31	5	11	5	11	y	0.39	7	11	7	11	y	0.00245648	-8.42615	down	ENSG00000060138.13
known_NIR_5558	chr10	21538912;21551921	21551816;21556643	+	21538912	21556643	cassetteExon	ENST00000377100.8	known	0.02	1.5	59	3;0	59	n	0.02	1	55	2;0	55	n	0	0	24	0;0	24	n	0.08	2.5	30	3;2	30	y	0.11	3.5	27	1;6	27	n	0.09	3	30	4;2	30	y	0.00253787	7.23627	up	ENSG00000078403.17
novel_NIR_44184	chr22	44702608	44725244	+	44702608;44714671	44714591;44725244	ES	ENST00000611394.4	novel	0.17	8	38	8	45;31	y	0.17	10	48.5	10	43;54	y	0.13	6	39.5	6	39;40	n	0	0	48	0	69;27	n	0.02	1	49	1	58;40	n	0.02	1	62.5	1	65;60	n	0.00259056	-9.61509	down	ENSG00000186654.21
known_NIR_11230	chr12	132085316	132103997	+	132090943	132103997	5pMXE	ENST00000332441.7	known	0.31	4	9	4	9	y	0.41	7	10	7	10	y	0.31	4	9	4	9	y	0.06	1	17	1	17	n	0	0	13	0	13	n	0	0	13	0	13	n	0.0026045	-8.31768	down	ENSG00000185684.15
known_NIR_18191	chr15	99138127;99139744	99139317;99156148	-	99138127;99139266	99139137;99156148	MXE	ENST00000480371.1	known	0.91	20	2	34;6	2;2	y	0.98	27.5	0.5	42;13	1;0	n	0.94	17	1	28;6	2;0	n	0.71	16	6.5	30;2	12;1	n	0.67	10	5	15;5	3;7	y	0.76	23.5	7.5	41;6	8;7	y	0.00275736	-6.97005	down	ENSG00000103852.13
novel_NIR_52540	chr5	181191442	181194234	+	181192016	181194234	5pMXE	ENST00000664992.1	novel	0.2	1	4	1	4	n	0.17	2	10	2	10	y	0.2	4	16	4	16	y	0	0	11	0	11	n	0	0	16	0	16	n	0	0	6	0	6	n	0.00275863	-19	down	ENSG00000250222.2
known_NIR_2910	chr1	2410451	2410630	-	2410451	2413597	A5SS	ENST00000508384.5	known	0	0	42	0	42	n	0.02	1	65	1	65	n	0	0	30	0	30	n	0.07	3	37	3	37	y	0.08	4	48	4	48	y	0.08	5	60	5	60	y	0.00277135	9.39149	up	ENSG00000157911.11
known_NIR_11692	chr12	42355222	42387456	+	42375074	42387456	A5SS&ES	ENST00000256678.12	known	0.11	2	16	2	16	y	0.13	5	33	5	33	y	0.13	3	20	3	20	y	0	0	20	0	20	n	0	0	26	0	26	n	0	0	40	0	40	n	0.0029091	-18.5	down	ENSG00000134283.18
known_NIR_9197	chr11	67464856	67467312	-	67464856;67465100	67465056;67467312	ES	ENST00000308022.7	known	0.02	2	83.5	2	104;63	y	0	0	69	0	90;48	n	0.03	2	59	2	72;46	y	0.1	10	95	10	125;65	y	0.1	9	80	9	93;67	y	0.08	5	57.5	5	81;34	y	0.00294678	6.93476	up	ENSG00000172663.9
known_NIR_14868	chr14	21093674	21103103	-	21093674	21104511	A5SS	ENST00000451119.6	known	1	8	0	8	0	n	1	10	0	10	0	n	0.92	22	2	22	2	y	0.71	10	4	10	4	y	0.78	7	2	7	2	n	0.69	9	4	9	4	y	0.00295311	-6.46541	down	ENSG00000165804.16
novel_NIR_18328	chr14	104793210	104794119	-	104792722	104794119	A3SS	ENST00000554848.5	novel	1	2	0	2	0	y	1	2	0	2	0	y	-	-	-	-	-	-	0	0	6	0	6	n	0.17	1	5	1	5	n	0.11	1	8	1	8	n	0.00300061	-18.2145	down	ENSG00000142208.18
known_NIR_1099	chr1	155060832;155061646	155061415;155062245	+	155060832;155062117	155061904;155062245	MXE	ENST00000529473.5	known	0.38	37	59.5	63;11	74;45	y	0.36	47	84.5	89;5	95;74	y	0.4	37.5	55.5	65;10	63;48	y	0.29	27	67	50;4	62;72	y	0.29	30	72.5	42;18	64;81	y	0.26	32	92.5	57;7	83;102	y	0.00301942	-6.54654	down	ENSG00000143537.14
known_NIR_856	chr1	151767299;151768233	151768058;151770172	+	151767299	151770172	cassetteExon	ENST00000635322.1	known	0.69	17.5	8	21;14	8	y	0.57	10.5	8	9;12	8	y	0.56	12.5	10	12;13	10	y	1	14	0	16;12	0	n	1	17.5	0	10;25	0	n	0.91	19.5	2	17;22	2	y	0.0030253	7.06542	up	ENSG00000143450.19
known_NIR_11404	chr12	19518113	19552853	+	19518113	19518675	3pMXE	ENST00000398864.7	known	0.2	11	44	11	44	y	0.29	15	37	15	37	y	0.29	15	36	15	36	y	0.55	23	19	23	19	y	0.63	31	18	31	18	y	0.51	33	32	33	32	y	0.00306855	6.55032	up	ENSG00000139154.16
novel_NIR_34869	chr19	52374427	52374504	+	52374427	52383849	A3SS	ENST00000422689.3	novel	0.25	6	18	6	18	y	0.45	9	11	9	11	y	0.38	6	10	6	10	y	0.86	12	2	12	2	y	0.96	25	1	25	1	y	0.78	7	2	7	2	y	0.00309332	6.4637	up	ENSG00000221923.9
novel_NIR_61458	chr7	99409245	99410037	+	99409004	99410037	A5SS	ENST00000496696.5	novel	0.11	3	25	3	25	n	0.09	4	41	4	41	n	0	0	32	0	32	n	0.4	23	34	23	34	y	0.3	13	31	13	31	y	0.39	15	23	15	23	y	0.00311937	6.38983	up	ENSG00000106245.11
known_NIR_25006	chr17	82244831	82248875	-	82244831	82245976	A5SS	ENST00000581241.5	known	0.18	149	698	149	698	y	0.18	160	711	160	711	y	0.17	137	660	137	660	y	0.21	184	699	184	699	y	0.21	205	780	205	780	y	0.2	182	747	182	747	y	0.00312559	6.36396	up	ENSG00000141551.14
known_NIR_768	chr1	151055993;151056786	151056656;151059479	-	151055993	151059479	cassetteExon	ENST00000439374.6	known	0.02	2	84	0;4	84	n	0.02	2	123	0;4	123	n	0.03	3	115	0;6	115	n	0.05	6	119	2;10	119	y	0.06	8.5	123	13;4	123	y	0.05	5	102	4;6	102	y	0.00312559	6.36396	up	ENSG00000197622.13
known_NIR_21959	chr17	32365487	32367772	+	32365487;32366757	32366665;32367772	ES	ENST00000321233.10	known	0.7	473	198	473	174;222	y	0.68	397	184	397	138;230	y	0.7	287	122	287	106;138	y	0.76	481	152	481	125;179	y	0.76	412	133	412	138;128	y	0.74	432	155	432	128;182	y	0.00312559	6.36396	up	ENSG00000010244.19
known_NIR_45696	chr7	123550586;123551576	123551368;123557404	-	123550586	123557404	cassetteExon	ENST00000471770.5	known	0.02	5	294	4;6	294	y	0.03	7	272	11;3	272	y	0.02	4	184	7;1	184	n	0.05	14	268	23;5	268	y	0.05	11.5	238	19;4	238	y	0.06	22.5	327	38;7	327	y	0.00312559	6.36396	up	ENSG00000128609.16
known_NIR_1282	chr1	155672731	155676548	-	155675096	155676548	A3SS&ES	ENST00000361140.8	known	0.03	4	137	4	137	y	0.04	8	197	8	197	y	0.03	4	134	4	134	y	0.01	2	165	2	165	y	0	0	198	0	198	n	0	0	161	0	161	n	0.00312559	-6.36396	down	ENSG00000163374.20
known_NIR_4707	chr1	77713281	77715742	-	77713281;77714783	77714614;77715742	ES	ENST00000370794.7	known	0	0	63.5	0	66;61	n	0.02	2	83	2	77;89	y	0	0	39.5	0	49;30	n	0.06	4	67.5	4	45;90	y	0.06	3	44.5	3	47;42	y	0.08	6	69	6	52;86	y	0.00312559	6.36396	up	ENSG00000077254.14
known_NIR_19008	chr16	29808741;29809764	29809540;29810077	+	29808741	29810077	cassetteExon	ENST00000545521.5	known	0.3	270.5	626	381;160	626	y	0.29	276.5	663	414;139	663	y	0.3	272	629	390;154	629	y	0.32	264	568	390;138	568	y	0.33	302.5	624	446;159	624	y	0.33	326	670	476;176	670	y	0.00312559	6.36396	up	ENSG00000103495.14
known_NIR_19780	chr16	57452936	57458246	+	57452936	57456504	3pMXE	ENST00000562734.5	known	0.04	10	259	10	259	y	0.04	15	369	15	369	y	0.03	8	245	8	245	y	0.01	2	318	2	318	y	0	0	283	0	283	n	0.01	2	292	2	292	y	0.00312559	-6.36396	down	ENSG00000088682.14
known_NIR_36802	chr3	127722566	127735705	-	127722566	127781789	A5SS	ENST00000453507.6	known	0	0	112	0	112	n	0.01	1	110	1	110	n	0	0	95	0	95	n	0.04	4	108	4	108	y	0.03	5	157	5	157	y	0.03	4	120	4	120	y	0.00312559	6.36396	up	ENSG00000074416.15
known_NIR_48466	chr8	127882185	127890589	+	127852347	127890589	A5SS	ENST00000657449.1	known	0	0	2	0	2	n	-	-	-	-	-	-	0	0	1	0	1	n	0.73	8	3	8	3	y	0.6	3	2	3	2	n	0.67	8	4	8	4	y	0.00315996	17.7471	up	ENSG00000249859.12
known_NIR_31641	chr2	24081031	24083001	-	24081031	24082885	A5SS	ENST00000238721.9	known	0.04	2	54	2	54	y	0.02	2	91	2	91	y	0.04	2	55	2	55	y	0.1	8	75	8	75	y	0.08	7	77	7	77	y	0.09	7	75	7	75	y	0.00323191	6.4254	up	ENSG00000115129.14
novel_NIR_26157	chr17	10406238	10497764	+	10406238	10567537	A3SS	ENST00000587182.2	novel	0.6	6	4	6	4	y	-	-	-	-	-	-	0.56	10	8	10	8	y	0.89	8	1	8	1	y	1	8	0	8	0	y	1	6	0	6	0	y	0.00330172	9.178	up	ENSG00000272975.1
known_NIR_15538	chr14	50727751	50729523	-	50726066	50729523	A3SS	ENST00000530997.7	known	0.11	1	8	1	8	n	0	0	6	0	6	n	0	0	2	0	2	n	0.5	6	6	6	6	y	0.57	4	3	4	3	n	0.71	10	4	10	4	y	0.00332352	7.75278	up	ENSG00000100503.26
novel_NIR_42906	chr22	15815566	15821259	+	15815566	15818574	3pMXE	ENST00000383038.7	novel	0.85	11	2	11	2	y	0.88	15	2	15	2	y	0.89	16	2	16	2	y	0.96	23	1	23	1	y	1	20	0	20	0	y	1	7	0	7	0	y	0.00333601	6.31364	up	ENSG00000206195.11
known_NIR_12786	chr12	566178	610346	-	566178	663328	A5SS	ENST00000305108.10	known	0.89	8	1	8	1	n	0.88	7	1	7	1	n	1	2	0	2	0	n	0.5	11	11	11	11	y	0.58	7	5	7	5	y	0.64	7	4	7	4	y	0.00334599	-6.26377	down	ENSG00000171840.13
known_NIR_13507	chr12	7201841	7202612	+	7201841	7202241	3pMXE	ENST00000542539.5	known	0.61	95	62	95	62	y	0.64	87	50	87	50	y	0.65	94	50	94	50	y	0.73	124	45	124	45	y	0.75	95	32	95	32	y	0.72	119	47	119	47	y	0.00347887	6.7082	up	ENSG00000139197.11
known_NIR_36406	chr3	101849917	101852085	+	101829688	101852085	A5SS	ENST00000394054.6	known	1	6	0	6	0	n	0.93	13	1	13	1	n	1	2	0	2	0	n	0.47	9	10	9	10	y	0.28	5	13	5	13	y	0.33	2	4	2	4	n	0.0034852	-10.033	down	ENSG00000144802.11
known_NIR_15313	chr14	24440926	24442346	-	24440926;24442260	24442178;24442346	ES	ENST00000538105.6	known	0.17	23	111	23	18;204	y	0.18	23	108	23	47;169	y	0.15	14	77	14	24;130	y	0.27	36	97.5	36	36;159	y	0.27	35	93	35	40;146	y	0.26	41	119	41	28;210	y	0.00349658	10.6066	up	ENSG00000100445.18
novel_NIR_65687	chr9	135565801	135566603	+	135565801	135566192	A3SS	ENST00000457014.1	novel	-	-	-	-	-	-	0.9	9	1	9	1	y	0.91	10	1	10	1	y	-	-	-	-	-	-	0	0	2	0	2	n	0	0	3	0	3	n	0.0035172	-181	down	ENSG00000122133.17
novel_NIR_52694	chr5	31466281	31467963	-	31466281	31467939	A5SS	ENST00000344624.8	novel	0.05	3	61	3	61	n	0	0	62	0	62	n	0.04	1	24	1	24	n	0.15	12	69	12	69	y	0.18	13	61	13	61	y	0.15	14	77	14	77	y	0.00353994	7.12039	up	ENSG00000113360.17
known_NIR_46342	chr7	152025884;152027718	152027597;152094190	+	152025884	152094190	cassetteExon	ENST00000430044.7	known	0.26	3.5	10	0;7	10	n	0.24	6.5	21	5;8	21	y	0.31	5	11	3;7	11	y	0.46	9.5	11	4;15	11	y	0.41	5.5	8	4;7	8	y	0.45	2.5	3	1;4	3	n	0.00370952	6.58407	up	ENSG00000178234.13
known_NIR_15311	chr14	24440926	24442346	-	24440926;24442260	24442098;24442346	ES	ENST00000554698.5	known	0.17	23	109	23	14;204	y	0.21	23	89	23	9;169	y	0.17	14	70	14	10;130	y	0.3	36	84.5	36	10;159	y	0.31	35	77	35	8;146	y	0.27	41	110	41	10;210	y	0.00372014	6.12795	up	ENSG00000100445.18
known_NIR_44332	chr6	32154777	32155768	+	32154777	32155688	A3SS	ENST00000478521.5	known	0	0	3	0	3	n	0.17	2	10	2	10	y	0	0	2	0	2	n	0.75	3	1	3	1	n	1	2	0	2	0	n	0.71	5	2	5	2	n	0.00387569	7.13538	up	ENSG00000221988.13
novel_NIR_37814	chr2	228488793	228554037	-	228488793	228506327	A5SS&ES	ENST00000432481.2	novel	-	-	-	-	-	-	1	3	0	3	0	y	1	1	0	1	0	n	0.38	5	8	5	8	y	0.45	5	6	5	6	y	0.5	5	5	5	5	y	0.00388559	-15.9957	down	ENSG00000232023.3
known_NIR_35486	chr22	24608023	24608990	+	24608023	24609962	A3SS	ENST00000652248.1	known	0.29	12	30	12	30	y	0.29	10	25	10	25	y	0.33	12	24	12	24	y	0.17	9	44	9	44	y	0.1	6	52	6	52	y	0.12	4	28	4	28	y	0.00389108	-7.01168	down	ENSG00000286070.2
known_NIR_42199	chr5	177531521	177532156	-	177531521	177531953	A5SS	ENST00000510479.5	known	0.33	2	4	2	4	n	0.33	2	4	2	4	n	0.27	4	11	4	11	y	0.1	1	9	1	9	n	0.08	2	24	2	24	y	0	0	7	0	7	n	0.00402303	-6.84653	down	ENSG00000146067.16
known_NIR_2786	chr1	233661936	233666595	+	233637434	233666595	A5SS	ENST00000487728.1	known	0	0	2	0	2	n	0	0	2	0	2	n	-	-	-	-	-	-	1	8	0	8	0	n	1	4	0	4	0	n	0.82	9	2	9	2	y	0.00404951	15.6667	up	ENSG00000135750.15
known_NIR_18189	chr15	99138127;99139266	99139137;99156148	-	99138127;99139399	99139317;99156148	MXE	ENST00000394132.7	known	0.07	2	25	2;2	34;16	y	0.02	0.5	28.5	1;0	42;15	n	0.04	1	24	2;0	28;20	n	0.23	6.5	22	12;1	30;14	n	0.23	5	17	3;7	15;19	y	0.24	7.5	24	8;7	41;7	y	0.00411927	12.7456	up	ENSG00000103852.13
known_NIR_32262	chr2	46543188	46576087	+	46543188;46543812	46543754;46576087	ES	ENST00000238738.9	known	0.32	9	19.5	9	21;18	y	0.25	7	21.5	7	17;26	y	0.24	8	25.5	8	28;23	y	0	0	30.5	0	36;25	n	0.03	1	35	1	40;30	n	0	0	35.5	0	35;36	n	0.00413439	-9.60114	down	ENSG00000119729.12
known_NIR_11710	chr12	4543904	4545219	+	4543904	4548092	A3SS	ENST00000536886.5	known	1	5	0	5	0	n	1	4	0	4	0	n	1	4	0	4	0	n	0.2	2	8	2	8	y	0.25	1	3	1	3	n	0.36	4	7	4	7	y	0.00416474	-15.4471	down	ENSG00000111247.15
novel_NIR_55677	chr6	33267307	33267865	-	33266712	33267865	A3SS	ENST00000478934.5	novel	0	0	24	0	24	n	0	0	5	0	5	n	0	0	2	0	2	n	0.47	8	9	8	9	y	0.38	6	10	6	10	y	0.4	2	3	2	3	n	0.00426062	15.2712	up	ENSG00000223501.9
known_NIR_10474	chr12	110645129	110647196	+	110645129	110647211	A3SS	ENST00000551590.5	known	0	0	46	0	46	n	0.02	1	44	1	44	n	0	0	42	0	42	n	0.14	6	38	6	38	y	0.14	6	38	6	38	y	0.1	4	37	4	37	y	0.00430208	8.04984	up	ENSG00000204852.17
known_NIR_33177	chr20	17954223	17955365	-	17954231	17955365	A3SS	ENST00000494401.5	known	0.52	12	11	12	11	y	0.57	12	9	12	9	y	0.6	3	2	3	2	n	0.78	7	2	7	2	n	0.75	18	6	18	6	y	0.73	16	6	16	6	y	0.00431289	6.91227	up	ENSG00000089006.17
novel_NIR_21753	chr15	69337501	69359317	+	69337501	69379883	A3SS	ENST00000558684.5	novel	0.3	3	7	3	7	y	0.24	5	16	5	16	y	0.26	8	23	8	23	y	0	0	25	0	25	n	0	0	20	0	20	n	0	0	13	0	13	n	0.0043465	-15.1186	down	ENSG00000137819.14
known_NIR_35337	chr22	20508444	20537117	+	20507735	20537117	A5SS	ENST00000406969.5	known	0	0	2	0	2	n	0.29	2	5	2	5	n	0.27	3	8	3	8	y	0.75	6	2	6	2	n	1	2	0	2	0	n	1	3	0	3	0	n	0.00449637	5.8281	up	ENSG00000099917.17
known_NIR_6064	chr10	73125243	73126673	+	73125243	73125398	A3SS&ES	ENST00000488223.5	known	0.33	3	6	3	6	n	0.33	2	4	2	4	n	0.17	1	5	1	5	n	-	-	-	-	-	-	0.86	6	1	6	1	n	0.82	9	2	9	2	y	0.00454255	9.88998	up	ENSG00000166321.14
known_NIR_7437	chr11	28290397	28296753	+	28290397	28296797	A3SS	ENST00000406787.7	known	0.83	5	1	5	1	n	1	15	0	15	0	n	1	5	0	5	0	n	0.55	6	5	6	5	y	0.56	9	7	9	7	y	0.42	5	7	5	7	y	0.00458142	-5.98374	down	ENSG00000169519.21
novel_NIR_60262	chr7	6009498	6009660	+	6009498	6017814	A3SS	ENST00000395236.2	novel	0	0	29	0	29	n	0	0	16	0	16	n	0	0	21	0	21	n	0.16	4	21	4	21	y	0.17	1	5	1	5	n	0.2	6	24	6	24	y	0.0045961	14.6996	up	ENSG00000106305.10
known_NIR_11666	chr12	405564	411747	+	409421	411747	A5SS&ES	ENST00000535052.5	known	0.44	12	15	12	15	y	0.46	13	15	13	15	y	0.53	17	15	17	15	y	0.23	7	24	7	24	y	0.29	5	12	5	12	y	0.27	4	11	4	11	y	0.00472003	-6.56626	down	ENSG00000120647.10
novel_NIR_57353	chr7	105752346	105788604	-	105665288	105788604	A3SS	ENST00000419735.8	novel	1	1	0	1	0	n	0.78	7	2	7	2	y	1	2	0	2	0	y	0	0	3	0	3	n	0.29	4	10	4	10	y	0.29	2	5	2	5	y	0.00472442	-6.04386	down	ENSG00000146776.15
known_NIR_49969	chr8	81715114	81718182	-	81717288	81718182	3pMXE	ENST00000523012.1	known	0.59	248	173	248	173	y	0.59	237	168	237	168	y	0.62	180	112	180	112	y	0.54	211	179	211	179	y	0.52	205	188	205	188	y	0.51	255	247	255	247	y	0.00475515	-5.75	down	ENSG00000104231.11
novel_NIR_52174	chr5	173609434	173609578	-	173609434	173616200	A5SS	ENST00000477985.1	novel	0.93	55	4	55	4	y	0.94	61	4	61	4	y	0.91	21	2	21	2	y	1	39	0	39	0	y	1	60	0	60	0	y	0.98	44	1	44	1	n	0.00478615	6.03023	up	ENSG00000145919.11
known_NIR_45552	chr7	107613432	107616261	+	107613432	107621630	A3SS	ENST00000491150.5	known	0.13	18	121	18	121	y	0.11	23	181	23	181	y	0.14	27	160	27	160	y	0.2	40	158	40	158	y	0.18	27	122	27	122	y	0.2	39	157	39	157	y	0.00478615	6.03023	up	ENSG00000075790.12
known_NIR_35059	chr21	45282459	45285678	-	45283527	45285678	A3SS&ES	ENST00000493811.1	known	0.01	1	75	1	75	n	0.02	2	101	2	101	y	0.02	1	48	1	48	n	0.05	3	53	3	53	y	0.04	3	82	3	82	y	0.04	4	94	4	94	y	0.00481268	5.65685	up	ENSG00000186866.17
known_NIR_22592	chr17	44207911;44209001	44208619;44209352	-	44207911	44209352	cassetteExon	ENST00000343638.9	known	0.01	1.5	267	3;0	267	n	0	0	239	0;0	239	n	0.01	2	208	0;4	208	n	0.04	9.5	235	17;2	235	y	0.03	8	287	13;3	287	y	0.03	7.5	269	4;11	269	y	0.00481268	5.65685	up	ENSG00000108312.15
known_NIR_10696	chr12	118016892	118019072	+	118016892;118017815	118017690;118019072	ES	ENST00000537315.5	known	0.96	76	3	76	5;1	n	0.94	71	4.5	71	7;2	y	0.95	76	4	76	8;0	n	1	107	0.5	107	0;1	n	1	94	0	94	0;0	n	0.99	69	1	69	2;0	n	0.00483389	7	up	ENSG00000111445.14
known_NIR_49263	chr8	18075587	18084676	-	18075587	18083981	5pMXE	ENST00000637790.2	known	0.07	18	239	18	239	y	0.07	18	237	18	237	y	0.06	9	145	9	145	y	0.01	2	249	2	249	y	0.03	7	209	7	209	y	0.02	4	242	4	242	y	0.00483389	-7	down	ENSG00000104763.20
known_NIR_38891	chr3	50366331	50367796	+	50366331	50367437	3pMXE	ENST00000607583.1	known	0.62	5	3	5	3	n	0.43	3	4	3	4	n	0.45	5	6	5	6	y	1	2	0	2	0	n	0.86	6	1	6	1	n	1	7	0	7	0	n	0.0048541	5.94686	up	ENSG00000271858.5
known_NIR_5755	chr10	35195214	35206895	+	35201486	35206895	A5SS&ES	ENST00000429130.7	known	0.67	8	4	8	4	y	0.48	12	13	12	13	y	0.57	12	9	12	9	y	0.06	1	16	1	16	n	0	0	4	0	4	n	0	0	4	0	4	n	0.0049072	-9.47412	down	ENSG00000095794.19
known_NIR_33015	chr2	9420100	9423373	-	9412405	9423373	A3SS	ENST00000490426.5	known	0.5	21	21	21	21	y	0.52	26	24	26	24	y	0.49	17	18	17	18	y	0.57	31	23	31	23	y	0.59	41	29	41	29	y	0.56	27	21	27	21	y	0.00495204	5.61249	up	ENSG00000119185.13
known_NIR_5271	chr10	113679978	113697494	+	113679349	113697494	A5SS	ENST00000621345.4	known	0.54	19	16	19	16	y	0.47	9	10	9	10	y	0.5	11	11	11	11	y	0.76	22	7	22	7	y	0.76	16	5	16	5	y	0.77	24	7	24	7	y	0.00505184	12.6533	up	ENSG00000165806.21
known_NIR_36253	chr22	50258301	50261167	-	50258301	50260829	5pMXE	ENST00000497036.5	known	0.83	160	33	160	33	y	0.85	213	38	213	38	y	0.83	200	41	200	41	y	0.89	221	27	221	27	y	0.9	205	23	205	23	y	0.89	221	27	221	27	y	0.00505837	7.60263	up	ENSG00000188130.14
known_NIR_1284	chr1	155672731;155675096	155674685;155676548	-	155672731	155676548	cassetteExon	ENST00000496324.5	known	0.94	68.5	4	0;137	4	n	0.93	99.5	8	2;197	8	y	0.94	67	4	0;134	4	n	0.98	83	2	1;165	2	n	1	99	0	0;198	0	n	1	80.5	0	0;161	0	n	0.00505837	7.60263	up	ENSG00000163374.20
known_NIR_21878	chr17	29925555	29929938	-	29793937	29929938	A3SS	ENST00000269033.7	known	0.95	61	3	61	3	y	0.96	55	2	55	2	y	0.95	41	2	41	2	y	1	47	0	47	0	n	1	57	0	57	0	n	1	45	0	45	0	n	0.00506332	14	up	ENSG00000141298.19
known_NIR_26291	chr19	12670097	12670180	+	12670080	12670180	A5SS	ENST00000546754.5	known	1	28	0	28	0	n	1	80	0	80	0	n	1	39	0	39	0	n	0.95	52	3	52	3	y	0.95	39	2	39	2	y	0.96	45	2	45	2	y	0.00506332	-14	down	ENSG00000123154.12
known_NIR_8016	chr11	46987310	47137645	+	46987310	47052388	3pMXE	ENST00000522712.6	known	0	0	65	0	65	n	0	0	68	0	68	n	0	0	83	0	83	n	0.05	3	55	3	55	y	0.04	4	98	4	98	y	0.05	4	77	4	77	y	0.00506332	14	up	ENSG00000149179.14
known_NIR_30338	chr2	145023273	145171998	+	144903803	145171998	A5SS	ENST00000653533.1	known	1	2	0	2	0	n	0.8	8	2	8	2	y	1	2	0	2	0	n	0	0	4	0	4	n	-	-	-	-	-	-	0	0	3	0	3	n	0.00506332	-14	down	ENSG00000226674.11
novel_NIR_31099	chr18	55893442;55917316	55917205;56017728	+	55893442	56017728	cassetteExon	ENST00000589440.1	novel	1	6	0	12;0	0	n	-	-	-	-	-	-	1	2.5	0	3;2	0	y	0	0	3	0;0	3	n	0	0	5	0;0	5	n	0.2	0.5	2	1;0	2	n	0.00506332	-14	down	ENSG00000267327.2
novel_NIR_43453	chr22	29031196	29031391	-	29031156	29031391	A3SS	ENST00000325660.3	novel	-	-	-	-	-	-	0	0	2	0	2	n	0	0	3	0	3	n	1	2	0	2	0	y	0.8	4	1	4	1	y	1	2	0	2	0	y	0.00506332	14	up	ENSG00000177993.3
novel_NIR_66859	chr9	95416164;95423292	95423101;95426724	-	95416164	95426724	cassetteExon	ENST00000433644.2	novel	1	4.5	0	3;6	0	y	1	0.5	0	1;0	0	n	1	1	0	0;2	0	n	0	0	3	0;0	3	n	0.2	0.5	2	1;0	2	n	0	0	3	0;0	3	n	0.00506332	-14	down	ENSG00000158169.13
known_NIR_26092	chr19	10688114	10688550	+	10683970	10688550	A5SS	ENST00000590869.1	known	0	0	22	0	22	n	0	0	12	0	12	n	0	0	21	0	21	n	0.12	2	15	2	15	y	0.14	1	6	1	6	n	0.11	1	8	1	8	n	0.00507434	13.9847	up	ENSG00000129351.17
novel_NIR_6417	chr1	94828586	94829354	+	94828586	94837711	A3SS	ENST00000446120.6	novel	0.03	1	28	1	28	n	0	0	19	0	19	n	0	0	27	0	27	n	0.18	9	40	9	40	y	0.23	6	20	6	20	y	0.16	6	32	6	32	y	0.00509638	7.79423	up	ENSG00000143036.17
known_NIR_463	chr1	1257310	1262170	-	1257310	1262269	A5SS	ENST00000464036.5	known	0	0	33	0	33	n	0.03	1	29	1	29	n	0.05	1	20	1	20	n	0.2	4	16	4	16	y	0.23	7	23	7	23	y	0.29	9	22	9	22	y	0.00519168	7.06762	up	ENSG00000160087.21
novel_NIR_27335	chr17	39661085	39662337	+	39661085	39662804	A3SS	ENST00000583639.5	novel	0.18	2	9	2	9	y	0.14	1	6	1	6	n	0.17	1	5	1	5	n	0	0	2	0	2	n	0	0	5	0	5	n	0	0	9	0	9	n	0.00537083	-13.5902	down	ENSG00000131748.16
novel_NIR_32271	chr19	17516280	17516368	+	17516280	17516371	A3SS	ENST00000594761.5	novel	0.5	4	4	4	4	y	0.62	5	3	5	3	y	0.5	4	4	4	4	y	0	0	11	0	11	n	0	0	10	0	10	n	0	0	7	0	7	n	0.00544222	-13.5	down	ENSG00000130313.7
novel_NIR_7508	chr10	22573457	22607927	-	22573457;22591781	22591629;22607927	ES	ENST00000376573.9	novel	0.18	10	45.5	10	32;59	y	0.2	8	31.5	8	34;29	y	0.14	4	24.5	4	27;22	n	0	0	29.5	0	32;27	n	0.02	1	56	1	74;38	n	0	0	36	0	28;44	n	0.00552219	-8.83883	down	ENSG00000150867.14
known_NIR_18604	chr16	2097777	2097868	-	2097780	2097868	A3SS	ENST00000262304.9	known	0.33	7	14	7	14	y	0.46	11	13	11	13	y	0.44	4	5	4	5	n	0	0	10	0	10	n	0	0	10	0	10	n	0.15	2	11	2	11	y	0.00566986	-5.59954	down	ENSG00000008710.20
novel_NIR_15452	chr12	52905045	52949456	-	52948828	52949456	3pMXE	ENST00000619952.2	novel	0	1	206	1	206	n	0	0	201	0	201	n	0	0	169	0	169	n	0.63	274	160	274	160	y	0.61	322	202	322	202	y	0.49	202	208	202	208	y	0.00569786	13.1911	up	ENSG00000170421.12
novel_NIR_18311	chr14	104753319	104755635	+	104753319	104756604	A3SS	ENST00000347067.9	novel	0.6	9	6	9	6	y	0.64	9	5	9	5	y	0.42	5	7	5	7	y	0.12	1	7	1	7	n	0	0	21	0	21	n	0	0	9	0	9	n	0.00570054	-6.53105	down	ENSG00000184990.13
novel_NIR_46956	chr3	37173023	37174539	-	37154656	37174539	A3SS	ENST00000461672.5	novel	1	1	0	1	0	n	1	6	0	6	0	y	0.67	2	1	2	1	y	0	0	3	0	3	n	0.2	3	12	3	12	y	0	0	2	0	2	n	0.00578483	-6.40103	down	ENSG00000093167.18
known_NIR_45936	chr7	139778471	139782666	+	139782564	139782666	A5SS&ES	ENST00000473948.6	known	0	0	15	0	15	n	0.09	1	10	1	10	n	0	0	9	0	9	n	0.27	4	11	4	11	y	0.2	2	8	2	8	y	0.3	6	14	6	14	y	0.00578713	5.37587	up	ENSG00000059377.18
novel_NIR_54231	chr6	128519270	128520259	-	128397688	128520259	A3SS	ENST00000368226.9	novel	0.06	1	15	1	15	n	0.08	2	22	2	22	n	0.14	3	18	3	18	n	0.3	3	7	3	7	y	0.25	4	12	4	12	y	0.25	7	21	7	21	y	0.00581487	5.92595	up	ENSG00000152894.15
known_NIR_8017	chr11	46987310	47137645	+	46987310;47052518	47052388;47137645	ES	ENST00000378618.6	known	0	0	71	0	65;77	n	0	0	71.5	0	68;75	n	0	0	83	0	83;83	n	0.04	3	72.5	3	55;90	y	0.04	4	100.5	4	98;103	y	0.05	4	75	4	77;73	y	0.00586515	13	up	ENSG00000149179.14
known_NIR_16100	chr14	75803253	75820007	+	75793100	75820007	A5SS	ENST00000298832.14	known	0.05	2	42	2	42	y	0.04	2	49	2	49	y	0.04	2	44	2	44	y	0	0	43	0	43	n	0	0	47	0	47	n	0	0	51	0	51	n	0.00586515	-13	down	ENSG00000119685.20
novel_NIR_29300	chr17	7570933	7574260	+	7573533	7574260	5pMXE	ENST00000581770.5	novel	0	0	1	0	1	n	-	-	-	-	-	-	0	0	4	0	4	n	0.2	1	4	1	4	n	0.2	2	8	2	8	y	0.25	3	9	3	9	y	0.00586515	13	up	ENSG00000161960.16
known_NIR_4323	chr1	52854630	52856998	+	52854630	52860731	A3SS	ENST00000612017.4	known	0.89	17	2	17	2	y	0.86	6	1	6	1	n	0.86	6	1	6	1	n	-	-	-	-	-	-	1	7	0	7	0	n	1	6	0	6	0	n	0.00586515	13	up	ENSG00000203995.10
known_NIR_2486	chr1	222815171	222835119	+	222827601	222835119	A5SS&ES	ENST00000442171.6	known	0.23	7	23	7	23	y	0.25	14	43	14	43	y	0.21	6	22	6	22	y	0.08	4	47	4	47	y	0.08	4	48	4	48	y	0.08	3	33	3	33	y	0.00587377	-12.9904	down	ENSG00000154309.9
novel_NIR_39104	chr2	55564476	55564902	-	55564497	55564902	A3SS	ENST00000611717.4	novel	0.13	5	34	5	34	n	0.15	6	34	6	34	y	0.17	1	5	1	5	n	0	0	17	0	17	n	0	0	35	0	35	n	0	0	49	0	49	n	0.00587377	-12.9904	down	ENSG00000275052.5
known_NIR_51334	chr9	62803103	62803984	+	62802209	62803984	A5SS	ENST00000452184.2	known	0.88	21	3	21	3	y	0.82	9	2	9	2	y	0.86	6	1	6	1	n	1	18	0	18	0	n	0.95	20	1	20	1	n	1	14	0	14	0	n	0.00591112	5.35706	up	ENSG00000238113.7
known_NIR_35489	chr22	24608023	24610358	+	24608023	24608990	3pMXE	ENST00000439775.1	known	0.79	46	12	46	12	y	0.81	44	10	44	10	y	0.75	36	12	36	12	y	0.88	69	9	69	9	y	0.92	69	6	69	6	y	0.93	51	4	51	4	y	0.00591791	5.42857	up	ENSG00000286070.2
known_NIR_20210	chr16	67847566	67865102	+	67847456	67865102	A5SS	ENST00000567105.5	known	0.04	3	80	3	80	y	0.01	1	81	1	81	n	0	0	84	0	84	n	0.17	13	63	13	63	y	0.15	12	70	12	70	y	0.11	10	83	10	83	y	0.0059583	5.9346	up	ENSG00000102898.12
known_NIR_9198	chr11	67464856	67467312	-	67464856;67465267	67465056;67467312	ES	ENST00000545682.5	known	0.03	2	61.5	2	104;19	y	0	0	51.5	0	90;13	n	0.04	2	43.5	2	72;15	y	0.13	10	68.5	10	125;12	y	0.15	9	49.5	9	93;6	y	0.1	5	45	5	81;9	y	0.00596472	5.48008	up	ENSG00000172663.9
novel_NIR_67805	chrX	153794391	153794674	+	153794585	153794674	A5SS	ENST00000320857.7	novel	0	0	38	0	38	n	0	0	16	0	16	n	0	0	18	0	18	n	0.38	3	5	3	5	y	0.29	8	20	8	20	y	0.35	17	32	17	32	y	0.00600091	12.8508	up	ENSG00000180879.14
known_NIR_16814	chr15	41286100	41308567	+	41286100	41298041	3pMXE	ENST00000558945.5	known	0.33	16	32	16	32	y	0.28	20	51	20	51	y	0.26	19	53	19	53	y	0.14	14	83	14	83	y	0.11	10	81	10	81	y	0.15	11	63	11	63	y	0.00600107	-6.51773	down	ENSG00000247556.6
known_NIR_26466	chr19	14093237	14097361	-	14093237;14093792	14093628;14097361	ES	ENST00000677971.1	known	0.02	2	120.5	2	148;93	y	0.01	2	135.5	2	146;125	y	0	0	126	0	144;108	n	0.05	7	143	7	139;147	y	0.06	10	158.5	10	207;110	y	0.05	7	122	7	125;119	y	0.0060506	6.5	up	ENSG00000072062.15
known_NIR_16677	chr15	30925939	30926608	+	30925939	30928553	A3SS	ENST00000667837.1	known	0	0	17	0	17	n	0	0	5	0	5	n	0	0	10	0	10	n	0.4	4	6	4	6	y	0.36	4	7	4	7	y	0.47	8	9	8	9	y	0.00609103	12.7545	up	ENSG00000198690.10
known_NIR_34723	chr21	29036374	29037276	+	29036374	29037279	A3SS	ENST00000399975.7	known	0.17	2	10	2	10	y	0.11	1	8	1	8	n	0.33	3	6	3	6	n	0.75	6	2	6	2	n	0.75	6	2	6	2	n	0.56	5	4	5	4	n	0.00611682	5.29818	up	ENSG00000156256.15
novel_NIR_1390	chr1	154963931	154965946	-	154963931	154965639	5pMXE	ENST00000490667.1	novel	-	-	-	-	-	-	0	0	6	0	6	n	0	0	3	0	3	n	0.4	2	3	2	3	y	0.31	5	11	5	11	y	0.33	2	4	2	4	y	0.00613756	12.7056	up	ENSG00000160691.19
known_NIR_41170	chr5	126371567	126465426	+	126360459	126465426	A5SS	ENST00000513040.5	known	0.75	15	5	15	5	y	0.83	5	1	5	1	n	0.75	3	1	3	1	n	0.41	7	10	7	10	y	0.29	2	5	2	5	n	0.46	13	15	13	15	y	0.00616157	-6.83521	down	ENSG00000155324.10
known_NIR_18190	chr15	99138127;99139266	99139137;99156148	-	99138127;99139467	99139317;99156148	MXE	ENST00000459771.5	known	0.11	2	17	2;2	34;0	n	0.02	0.5	22	1;0	42;2	n	0.07	1	14	2;0	28;0	n	0.28	6.5	17	12;1	30;4	n	0.37	5	8.5	3;7	15;2	y	0.26	7.5	21.5	8;7	41;2	y	0.00622745	5.54417	up	ENSG00000103852.13
novel_NIR_485	chr1	11662928	11663145	+	11662928	11663142	A3SS	ENST00000471895.1	novel	0.17	2	10	2	10	y	0	0	7	0	7	n	0.08	1	11	1	11	n	0.5	5	5	5	5	y	0.37	7	12	7	12	y	0.41	7	10	7	10	y	0.00624188	5.50558	up	ENSG00000132879.14
known_NIR_9423	chr11	72109940	72110088	-	72107605	72110088	A3SS	ENST00000502597.2	known	0.75	9	3	9	3	y	0.71	5	2	5	2	n	0.67	12	6	12	6	y	1	7	0	7	0	n	1	9	0	9	0	n	1	15	0	15	0	n	0.00628196	12.5574	up	ENSG00000110200.8
novel_NIR_37779	chr2	226786311	226794989	-	226736250	226794989	A3SS	ENST00000305123.6	novel	0.19	11	47	11	47	y	0.17	7	34	7	34	y	0.2	2	8	2	8	y	0.06	4	65	4	65	n	0	0	38	0	38	n	0	0	47	0	47	n	0.00630911	-7.62493	down	ENSG00000169047.6
known_NIR_32722	chr2	74421816;74422375	74422153;74422870	+	74421816	74422870	cassetteExon	ENST00000461531.5	known	0.55	48.5	40	41;56	40	y	0.6	59.5	40	44;75	40	y	0.57	44.5	34	37;52	34	y	0.67	75	37	57;93	37	y	0.73	76	28	35;117	28	y	0.69	58.5	26	29;88	26	y	0.00631747	5.397	up	ENSG00000005448.17
known_NIR_20403	chr16	70523928	70526587	+	70523928;70525017	70524864;70526587	ES	ENST00000566095.6	known	1	47	0	47	0;0	n	1	85	0	85	0;0	n	0.98	47	1	47	0;2	n	0.91	30	3	30	0;6	n	0.92	55	5	55	1;9	n	0.88	49	7	49	4;10	y	0.00638082	-6.54846	down	ENSG00000189091.13
known_NIR_32741	chr2	74458671;74459098	74458997;74459643	+	74458671;74459562	74458832;74459643	MXE	ENST00000474185.5	known	0.5	5	5	4;6	6;4	y	0.54	3.5	3	1;6	1;5	n	0.56	2.5	2	2;3	3;1	n	0.82	7	1.5	9;5	1;2	n	0.84	10.5	2	11;10	2;2	y	0.95	10.5	0.5	2;19	1;0	n	0.00639711	7.63488	up	ENSG00000239779.7
known_NIR_10772	chr12	120224377	120226153	-	120224377	120226362	A5SS	ENST00000536957.5	known	0.05	1	21	1	21	n	0	0	17	0	17	n	0	0	26	0	26	n	0.23	6	20	6	20	y	0.16	4	21	4	21	y	0.25	2	6	2	6	n	0.00644852	6.15118	up	ENSG00000089159.17
known_NIR_30996	chr2	216435496	216447018	+	216435496;216438485	216438420;216447018	ES	ENST00000357276.9	known	0.04	3	78	3	65;91	y	0	0	44.5	0	45;44	n	0.03	2	64	2	63;65	y	0.12	10	71	10	60;82	y	0.11	10	77.5	10	86;69	y	0.09	5	52.5	5	44;61	y	0.00646393	5.59017	up	ENSG00000138375.13
known_NIR_29405	chr19	55692796	55692954	+	55692796	55692951	A3SS	ENST00000270460.11	known	0.42	224	314	224	314	y	0.44	255	320	255	320	y	0.42	219	302	219	302	y	0.37	185	317	185	317	y	0.39	237	375	237	375	y	0.38	204	333	204	333	y	0.00647645	-5.2915	down	ENSG00000063245.15
novel_NIR_20337	chr15	101966223	101972901	+	101966223;101972694	101972596;101972901	ES	ENST00000558686.5	novel	0.29	17	41	17	10;72	y	0.33	18	36.5	18	6;67	y	0.3	12	28	12	10;46	y	0.24	13	41	13	7;75	y	0.2	11	44	11	15;73	y	0.22	16	57	16	14;100	y	0.00654472	-5.2	down	ENSG00000185596.16
known_NIR_27370	chr19	35001244	35009119	+	34996291	35009119	A5SS	ENST00000599564.5	known	0	0	15	0	15	n	0.1	2	18	2	18	y	0	0	11	0	11	n	0.29	5	12	5	12	y	0.29	2	5	2	5	n	0.21	4	15	4	15	y	0.00655482	5.38799	up	ENSG00000089351.15
novel_NIR_50520	chr4	76124756	76144149	-	76124756	76148308	A5SS	ENST00000504173.1	novel	1	9	0	9	0	y	1	7	0	7	0	y	1	10	0	10	0	y	0.56	5	4	5	4	y	0.67	2	1	2	1	y	0.6	3	2	3	2	y	0.00672532	-12.1323	down	ENSG00000138750.15
known_NIR_6481	chr10	98429642	98430571	-	98429642;98429889	98429791;98430571	ES	ENST00000325103.10	known	0.67	132	65	132	64;66	y	0.71	109	44	109	49;39	y	0.69	99	44.5	99	57;32	y	0.57	99	73.5	99	87;60	y	0.6	94	62.5	94	51;74	y	0.54	111	95.5	111	95;96	y	0.00679028	-5.76461	down	ENSG00000107521.20
known_NIR_50927	chr9	137163904	137167774	+	137163904;137165296	137165186;137167774	ES	ENST00000371553.7	known	0.43	3	4	3	6;2	y	0.54	7	6	7	9;3	y	0.42	4	5.5	4	7;4	y	0	0	2	0	1;3	n	0	0	10.5	0	20;1	n	0	0	7.5	0	5;10	n	0.00681343	-12.0528	down	ENSG00000176884.16
known_NIR_34370	chr20	52164757	52186832	-	52164757;52166025	52165864;52186832	ES	ENST00000371518.6	known	0.05	2	35	2	23;47	y	0.03	1	34	1	32;36	n	0	0	17	0	15;19	n	0.14	5	30	5	35;25	y	0.16	5	25.5	5	7;44	y	0.15	7	41	7	50;32	y	0.00681981	7.88843	up	ENSG00000020256.20
known_NIR_28933	chr19	49663258;49664846	49664674;49665631	-	49663258	49665631	cassetteExon	ENST00000596765.5	known	0.62	113.5	71	8;219	71	y	0.64	99.5	57	5;194	57	y	0.62	72.5	45	5;140	45	y	0.69	103.5	46	3;204	46	y	0.7	103.5	45	14;193	45	y	0.67	104.5	51	17;192	51	y	0.00685323	5.4272	up	ENSG00000126456.16
known_NIR_3364	chr1	31910112;31915987	31915895;31918970	-	31910112;31911826	31911696;31918970	MXE	ENST00000457805.6	known	0.34	294.5	567	4;585	1057;77	y	0.36	303	527.5	1;605	1012;43	n	0.33	192	385.5	0;384	723;48	n	0.41	333	471	4;662	892;50	y	0.41	313.5	457	4;623	886;28	y	0.39	344	528.5	9;679	993;64	y	0.00685323	5.4272	up	ENSG00000184007.22
known_NIR_10348	chr12	109478109	109481637	+	109477764	109481637	A5SS	ENST00000434735.6	known	0.78	28	8	28	8	y	0.81	21	5	21	5	y	0.7	23	10	23	10	y	0.53	19	17	19	17	y	0.5	10	10	10	10	y	0.59	20	14	20	14	y	0.00689613	-5.29682	down	ENSG00000151148.14
known_NIR_26794	chr19	17406296	17420313	+	17406296	17413097	3pMXE	ENST00000634291.2	known	0.19	8	35	8	35	y	0.18	10	46	10	46	y	0.16	10	54	10	54	y	0.11	6	49	6	49	y	0.13	10	68	10	68	y	0.1	6	57	6	57	y	0.00709081	-5.07796	down	ENSG00000282851.2
novel_NIR_8944	chr10	94969920	94972104	+	94949284	94972104	A5SS	ENST00000260682.8	novel	0	0	8	0	8	n	0	0	5	0	5	n	0	0	4	0	4	n	0.57	4	3	4	3	y	0.67	6	3	6	3	y	0.5	10	10	10	10	y	0.0071559	11.7578	up	ENSG00000138109.11
novel_NIR_53249	chr5	6765981;6773686	6773455;6775559	+	6765981	6775559	cassetteExon	ENST00000649262.1	novel	0.09	0.5	5	0;1	5	n	0.2	2.5	10	3;2	10	y	0.1	1	9	0;2	9	n	0.43	1.5	2	0;3	2	n	0.47	8	9	10;6	9	y	0.33	1	2	0;2	2	n	0.00731925	5.14072	up	ENSG00000251365.4
known_NIR_52774	chrX	63655737	63656510	-	63655737	63665886	A5SS	ENST00000253401.10	known	0.45	9	11	9	11	y	0.33	4	8	4	8	y	0.29	4	10	4	10	y	0	0	32	0	32	n	0	0	10	0	10	n	0.11	4	34	4	34	y	0.00737387	-5.29265	down	ENSG00000131089.17
known_NIR_8207	chr11	5664173	5665656	-	5665395	5665656	A3SS	ENST00000380034.8	known	0.21	13	48	13	48	y	0.23	14	47	14	47	y	0.18	6	27	6	27	y	0.07	2	28	2	28	y	0	0	48	0	48	n	0.07	3	39	3	39	y	0.00739488	-5.82086	down	ENSG00000132256.20
known_NIR_15138	chr14	24094254	24096892	+	24094845	24096892	5pMXE	ENST00000545054.6	known	0.57	4	3	4	3	n	0.6	3	2	3	2	n	0.38	5	8	5	8	y	0	0	6	0	6	n	0	0	3	0	3	n	0.17	1	5	1	5	n	0.00740422	-5.1573	down	ENSG00000100889.12
known_NIR_38912	chr3	51671288;51672392	51672210;51674271	+	51671288	51674271	cassetteExon	ENST00000614067.4	known	0.26	25	70	12;38	70	y	0.22	18	63	13;23	63	y	0.23	18	59	6;30	59	y	0.14	11	69	0;22	69	n	0.16	13	68	5;21	68	y	0.17	13.5	68	1;26	68	n	0.00740771	-5.36656	down	ENSG00000164081.13
known_NIR_47655	chr7	87152555	87163495	+	87154528	87163495	A5SS&ES	ENST00000394703.9	known	0	0	1	0	1	n	0	0	3	0	3	n	0.33	4	8	4	8	y	0.67	2	1	2	1	n	1	3	0	3	0	n	1	2	0	2	0	n	0.00741653	5.01403	up	ENSG00000135164.19
novel_NIR_13655	chr12	121310011	121318052	-	121310011	121318277	A5SS	ENST00000534976.5	novel	0.4	2	3	2	3	n	0.38	3	5	3	5	y	0.5	2	2	2	2	y	0	0	2	0	2	n	0	0	5	0	5	n	0	0	8	0	8	n	0.00748351	-11.4947	down	ENSG00000089053.13
known_NIR_32873	chr2	85616456	85619220	+	85612359	85619220	A5SS	ENST00000448971.5	known	0.75	6	2	6	2	n	0.81	17	4	17	4	y	0.8	8	2	8	2	y	1	19	0	19	0	n	1	18	0	18	0	n	1	13	0	13	0	n	0.00748351	11.4947	up	ENSG00000168883.20
known_NIR_50926	chr9	137163904	137167774	+	137163904	137165186	A3SS&ES	ENST00000371561.8	known	0.33	3	6	3	6	n	0.44	7	9	7	9	y	0.36	4	7	4	7	y	0	0	1	0	1	n	0	0	20	0	20	n	0	0	5	0	5	n	0.00751104	-11.4734	down	ENSG00000176884.16
known_NIR_12963	chr12	57627891	57628122	-	57627858	57628122	A3SS	ENST00000341156.9	known	0.57	29	22	29	22	y	0.52	23	21	23	21	y	0.58	22	16	22	16	y	0.42	14	19	14	19	y	0.43	22	29	22	29	y	0.4	14	21	14	21	y	0.00752351	-6.8133	down	ENSG00000135454.14
novel_NIR_1513	chr1	155250681	155251095	-	155248473	155251095	A3SS	ENST00000491082.1	novel	0	0	16	0	16	n	0.05	1	18	1	18	n	0	0	9	0	9	n	0.31	5	11	5	11	y	0.22	6	21	6	21	y	0.21	4	15	4	15	y	0.00753796	6.40649	up	ENSG00000160767.21
known_NIR_29035	chr19	49811699;49812335	49812251;49812996	-	49811699;49812736	49812615;49812996	MXE	ENST00000525130.5	known	0.6	43	28.5	82;4	0;57	n	0.59	48	33	96;0	3;63	n	0.63	29.5	17	56;3	3;31	y	0.78	76.5	22	139;14	1;43	n	0.75	62	21	106;18	2;40	y	0.71	52.5	21.5	99;6	6;37	y	0.00757365	5.9397	up	ENSG00000010361.14
novel_NIR_35200	chr19	55635712	55638097	+	55635712	55642497	A3SS	ENST00000592881.1	novel	0.33	1	2	1	2	n	0.33	1	2	1	2	n	0.25	2	6	2	6	y	0	0	2	0	2	n	0	0	3	0	3	n	-	-	-	-	-	-	0.00764008	-11.375	down	ENSG00000213015.9
novel_NIR_37939	chr2	233637377	233638761	+	233637377	233767034	A3SS	ENST00000344644.9	novel	0.33	2	4	2	4	y	0.25	1	3	1	3	n	0.33	2	4	2	4	y	0	0	4	0	4	n	0	0	2	0	2	n	0	0	16	0	16	n	0.00764008	-11.375	down	ENSG00000242515.5
novel_NIR_22369	chr15	89070191	89082491	+	89070191;89075384	89075296;89082491	ES	ENST00000565938.1	novel	0.3	5	11.5	5	16;7	y	0.36	6	10.5	6	19;2	y	0.25	3	9	3	16;2	y	0.12	2	14.5	2	27;2	n	0	0	17.5	0	18;17	n	0	0	6	0	12;0	n	0.0076891	-5.15339	down	ENSG00000260123.2
novel_NIR_44462	chr22	50531295	50531453	-	50531295	50531570	A5SS	ENST00000401779.5	novel	0.19	11	46	11	46	y	0.2	11	44	11	44	y	0.26	5	14	5	14	y	0.09	5	48	5	48	n	0.09	5	53	5	53	n	0.04	3	71	3	71	n	0.00775543	-5.21452	down	ENSG00000177989.14
known_NIR_13524	chr12	76047718	76048393	-	76047718	76048421	A5SS	ENST00000552056.5	known	0.69	1008	461	1008	461	y	0.7	1062	449	1062	449	y	0.69	723	321	723	321	y	0.72	1014	395	1014	395	y	0.72	855	337	855	337	y	0.71	1108	455	1108	455	y	0.0077626	4.94975	up	ENSG00000187109.15
known_NIR_20168	chr16	67659795	67659877	-	67659795	67659903	A5SS	ENST00000620761.6	known	0.01	1	186	1	186	n	0	0	183	0	183	n	0	0	118	0	118	n	0.03	5	174	5	174	y	0.03	6	200	6	200	y	0.02	3	165	3	165	y	0.0077626	4.94975	up	ENSG00000102977.17
known_NIR_7500	chr11	314356	314674	+	314356	314927	A3SS	ENST00000681938.1	known	0.04	14	318	14	318	y	0.04	18	457	18	457	y	0.03	10	324	10	324	y	0.01	3	443	3	443	y	0.01	4	458	4	458	y	0.02	8	477	8	477	y	0.0077626	-4.94975	down	ENSG00000185885.17
known_NIR_5730	chr10	35127193;35148491	35148368;35206895	+	35127193	35206895	cassetteExon	ENST00000474362.5	known	0.95	18.5	1	37;0	1	n	1	16	0	28;4	0	n	1	13	0	24;2	0	n	0.89	17	2	32;2	2	y	0.86	12	2	24;0	2	n	0.86	18	3	34;2	3	y	0.00784269	-5.83095	down	ENSG00000095794.19
known_NIR_3447	chr1	32232184	32234952	-	32232184;32234814	32234704;32234952	ES	ENST00000423995.5	known	0.33	4	8	4	11;5	y	0.25	4	12	4	11;13	y	0.3	4	9.5	4	11;8	y	0	0	12	0	20;4	n	0.07	1	13.5	1	14;13	n	0.12	2	14	2	20;8	y	0.00787011	-5.48935	down	ENSG00000220785.7
known_NIR_23636	chr17	72404816	72428236	-	72404816	72420700	5pMXE	ENST00000647652.1	known	0.85	66	12	66	12	y	0.79	42	11	42	11	y	0.77	24	7	24	7	y	0.61	20	13	20	13	y	0.66	35	18	35	18	y	0.67	50	25	50	25	y	0.00791939	-5.15892	down	ENSG00000227036.8
novel_NIR_44183	chr22	44702608	44725244	+	44702608	44714591	A3SS&ES	ENST00000477331.5	novel	0.15	8	45	8	45	y	0.19	10	43	10	43	y	0.13	6	39	6	39	n	0	0	69	0	69	n	0.02	1	58	1	58	n	0.02	1	65	1	65	n	0.00803456	-7.6014	down	ENSG00000186654.21
known_NIR_15718	chr14	59484593	59486713	+	59484593	59486731	A3SS	ENST00000425728.6	known	0.56	19	15	19	15	y	0.65	33	18	33	18	y	0.65	22	12	22	12	y	0.89	16	2	16	2	y	0.78	31	9	31	9	y	0.88	30	4	30	4	y	0.00809003	4.97965	up	ENSG00000050130.18
novel_NIR_44244	chr22	45604758	45626273	-	45604758	45605401	5pMXE	ENST00000422971.1	novel	0	0	13	0	13	n	0.17	1	5	1	5	n	0	0	8	0	8	n	0.5	1	1	1	1	n	0.38	8	13	8	13	y	0.42	8	11	8	11	y	0.00814431	5.64295	up	ENSG00000238120.1
known_NIR_19007	chr16	29808741	29810077	+	29808741	29809540	3pMXE	ENST00000562557.5	known	0.62	626	381	626	381	y	0.62	663	414	663	414	y	0.62	629	390	629	390	y	0.59	568	390	568	390	y	0.58	624	446	624	446	y	0.58	670	476	670	476	y	0.0081634	-11	down	ENSG00000103495.14
known_NIR_28468	chr19	45638634	45638845	-	45633139	45638845	A3SS	ENST00000586195.5	known	1	82	0	82	0	n	1	87	0	87	0	n	1	85	0	85	0	n	0.96	76	3	76	3	y	0.97	61	2	61	2	y	0.96	66	3	66	3	y	0.0081634	-11	down	ENSG00000125746.18
known_NIR_36451	chr3	111979203;111981967	111981784;111986264	+	111979203	111986264	cassetteExon	ENST00000491580.1	known	1	72	0	67;77	0	n	1	70	0	46;94	0	n	1	54	0	49;59	0	n	0.96	71.5	3	54;89	3	y	0.96	65	3	34;96	3	y	0.97	74	2	49;99	2	y	0.0081634	-11	down	ENSG00000144827.9
novel_NIR_34250	chr19	47205129	47209159	+	47169923	47209159	A5SS	ENST00000413379.7	novel	0.96	77	3	77	3	y	0.97	104	3	104	3	y	0.96	53	2	53	2	y	1	109	0	109	0	y	1	121	0	121	0	y	1	79	0	79	0	y	0.0081634	11	up	ENSG00000142230.13
known_NIR_18160	chr15	90984140	90994407	-	90984140	90984693	A5SS&ES	ENST00000643536.1	known	0.04	3	78	3	78	y	0.04	2	52	2	52	y	0.03	1	31	1	31	n	0	0	66	0	66	n	0	0	45	0	45	n	0	0	78	0	78	n	0.0081634	-11	down	ENSG00000284946.1
known_NIR_27094	chr19	19199234	19201657	+	19199234	19201649	A3SS	ENST00000456252.7	known	0	0	587	0	587	n	0	0	589	0	589	n	0	0	607	0	607	n	0.04	32	724	32	724	y	0.04	30	755	30	755	y	0.03	20	723	20	723	y	0.0081634	11	up	ENSG00000064490.14
known_NIR_30036	chr2	111208977;111233739	111233628;111344061	-	111208977	111344061	cassetteExon	ENST00000666144.1	known	1	3	0	2;4	0	n	1	1	0	1;1	0	n	1	4	0	7;1	0	n	0.6	1.5	1	3;0	1	n	0.6	6	4	7;5	4	y	0.48	5.5	6	0;11	6	n	0.0081634	-11	down	ENSG00000172965.17
known_NIR_31276	chr2	228488793	228506327	-	228488793	228568254	A5SS	ENST00000656071.1	known	0	0	48	0	48	n	0	0	50	0	50	n	0	0	25	0	25	n	0.13	8	53	8	53	y	0.1	6	54	6	54	y	0.1	5	43	5	43	y	0.0081634	11	up	ENSG00000232023.3
novel_NIR_6650	chr10	101708401	101710870	-	101708401	101729753	A5SS	ENST00000670664.1	novel	0	0	4	0	4	n	0.25	1	3	1	3	n	0	0	2	0	2	n	1	4	0	4	0	y	1	4	0	4	0	y	-	-	-	-	-	-	0.0081634	11	up	ENSG00000224817.2
novel_NIR_10981	chr11	59134683	59136057	-	59135588	59136057	A3SS	ENST00000501817.6	novel	0	0	1	0	1	n	0	0	1	0	1	n	-	-	-	-	-	-	1	2	0	2	0	y	1	1	0	1	0	n	0.75	3	1	3	1	y	0.0081634	11	up	ENSG00000245571.7
known_NIR_36507	chr3	11829864;11833151	11833003;11839222	-	11829864	11839222	cassetteExon	ENST00000455809.5	known	0.09	10	96	12;8	96	y	0.11	11.5	97	6;17	97	y	0.11	7	56	5;9	56	y	0.06	5	84	3;7	84	y	0.05	2.5	51	1;4	51	n	0.03	4	116	6;2	116	y	0.00830343	-5.12569	down	ENSG00000144559.10
novel_NIR_26815	chr17	29293164	29293783	-	29267530	29293783	A3SS	ENST00000579665.1	novel	0	0	2	0	2	n	0	0	4	0	4	n	0.33	1	2	1	2	n	1	6	0	6	0	y	-	-	-	-	-	-	0.86	6	1	6	1	y	0.00834198	6.28911	up	ENSG00000108256.9
known_NIR_6090	chr10	73500838;73504990	73504850;73505308	-	73500838	73505308	cassetteExon	ENST00000418501.5	known	0.55	35	29	54;16	29	y	0.57	29.5	22	35;24	22	y	0.57	19.5	15	16;23	15	y	0.71	31.5	13	26;37	13	y	0.71	41	17	39;43	17	y	0.66	29	15	32;26	15	y	0.00838492	7.24212	up	ENSG00000166348.19
known_NIR_14271	chr13	50927478	50929461	+	50927478	50929475	A3SS	ENST00000422660.6	known	0.04	4	91	4	91	y	0.06	6	100	6	100	y	0.06	5	83	5	83	y	0.02	2	113	2	113	y	0.01	1	168	1	168	n	0	0	75	0	75	n	0.00838827	-4.91354	down	ENSG00000136104.21
known_NIR_14802	chr14	20452149	20452276	-	20452149	20452329	A5SS	ENST00000206542.9	known	0.04	4	104	4	104	y	0.06	6	90	6	90	y	0.05	4	73	4	73	y	0	0	84	0	84	n	0	0	111	0	111	n	0.02	2	81	2	81	y	0.00838827	-4.91354	down	ENSG00000092094.11
known_NIR_31379	chr2	231798964;231801207	231801140;231807487	+	231798964	231807487	cassetteExon	ENST00000410024.5	known	0.08	23.5	264	15;32	264	y	0.07	19	260	16;22	260	y	0.06	14	234	11;17	234	y	0.02	5.5	262	4;7	262	y	0.02	5.5	285	6;5	285	y	0.04	13	295	7;19	295	y	0.00838827	-4.91354	down	ENSG00000144524.18
known_NIR_50983	chr9	137782397	137790848	+	137782397	137784106	3pMXE	ENST00000462484.5	known	1	57	0	57	0	n	1	49	0	49	0	n	0.96	47	2	47	2	y	0.9	55	6	55	6	y	0.92	60	5	60	5	y	0.88	38	5	38	5	y	0.00838827	-4.91354	down	ENSG00000181090.21
known_NIR_23248	chr17	58207729	58207894	-	58207218	58207894	A3SS	ENST00000678763.1	known	0.23	6	20	6	20	y	0.19	6	26	6	26	y	0.14	2	12	2	12	y	0	0	22	0	22	n	0	0	11	0	11	n	0.05	1	20	1	20	n	0.00842535	-5.49947	down	ENSG00000011143.19
known_NIR_31526	chr2	238064469;238073847	238073783;238081709	+	238064469	238081709	cassetteExon	ENST00000413463.6	known	0.95	19	1	7;31	1	n	1	17	0	3;31	0	n	0.83	9.5	2	1;18	2	n	0.68	13	6	3;23	6	y	0.53	8	7	2;14	7	y	0.59	11.5	8	0;23	8	n	0.00848176	-4.9	down	ENSG00000132330.18
novel_NIR_1399	chr1	154974045	154974248	-	154973508	154974248	A3SS	ENST00000366442.2	novel	0.8	8	2	8	2	y	0.55	21	17	21	17	y	0.58	18	13	18	13	y	0.1	1	9	1	9	n	0.12	1	7	1	7	n	0	0	14	0	14	n	0.00852188	-6.54313	down	ENSG00000160691.19
known_NIR_1092	chr1	155060832;155061489	155061415;155062245	+	155060832;155061975	155061904;155062245	MXE	ENST00000359280.8	known	0.48	98	105.5	63;133	74;137	y	0.5	109	108	89;129	95;121	y	0.47	84.5	96.5	65;104	63;130	y	0.44	85	108.5	50;120	62;155	y	0.42	82	111.5	42;122	64;159	y	0.41	78	112.5	57;99	83;142	y	0.00858092	-4.8107	down	ENSG00000143537.14
novel_NIR_56701	chr6	89662239	89664487	-	89662239;89662967	89662792;89664487	ES	ENST00000369393.8	novel	0.21	3	11.5	3	18;5	y	0.34	10	19.5	10	24;15	y	0.26	4	11.5	4	16;7	y	0	0	9	0	12;6	n	0.07	1	12.5	1	20;5	n	0	0	10	0	15;5	n	0.00873162	-5.54653	down	ENSG00000112159.12
known_NIR_25060	chr17	82419883;82424503	82424419;82428558	+	82419883;82428127	82428030;82428558	MXE	ENST00000582315.5	known	0.83	14.5	3	2;27	4;2	y	0.75	6	2	0;12	0;4	n	0.82	11.5	2.5	0;23	1;4	n	0.93	13.5	1	1;26	0;2	n	1	15.5	0	0;31	0;0	n	0.95	9	0.5	0;18	0;1	n	0.00878872	4.89898	up	ENSG00000169660.17
known_NIR_48692	chr8	128095817	128096518	+	128070272	128096518	A5SS	ENST00000653522.1	known	0.06	4	60	4	60	y	0.11	9	72	9	72	y	0.03	1	34	1	34	n	0.26	14	40	14	40	y	0.24	23	73	23	73	y	0.18	10	45	10	45	y	0.00881937	4.77618	up	ENSG00000249859.12
novel_NIR_46586	chr3	195967990	195968215	-	195967990	195968219	A5SS	ENST00000427841.5	novel	0.46	6	7	6	7	y	0.36	4	7	4	7	y	0.5	4	4	4	4	y	0	0	7	0	7	n	0	0	5	0	5	n	0	0	10	0	10	n	0.0088347	-10.5685	down	ENSG00000185485.14
known_NIR_7080	chr11	12965214	12989456	-	12980909	12989456	3pMXE	ENST00000671253.1	known	0.55	45	37	45	37	y	0.67	43	21	43	21	y	0.61	48	31	48	31	y	0.37	16	27	16	27	y	0.36	24	42	24	42	y	0.43	32	42	32	42	y	0.00885808	-5.45238	down	ENSG00000251381.8
known_NIR_51710	chrX	108437993	108438186	-	108437993	108439358	A5SS	ENST00000372216.8	known	1	11	0	11	0	n	-	-	-	-	-	-	1	6	0	6	0	n	0.69	9	4	9	4	y	0.57	8	6	8	6	y	0.6	6	4	6	4	y	0.00888299	-10.5393	down	ENSG00000197565.16
known_NIR_25329	chr18	13069856	13072755	+	13069856;13071212	13071039;13072755	ES	ENST00000506447.5	known	0.2	2	8	2	12;4	y	0.27	2	5.5	2	6;5	y	0.33	2	4	2	3;5	y	0	0	13	0	11;15	n	0	0	7.5	0	6;9	n	0.09	1	10	1	12;8	n	0.00893772	-4.92296	down	ENSG00000101639.18
known_NIR_1699	chr1	1616614	1623431	+	1616614	1617078	3pMXE	ENST00000463492.1	known	0.88	7	1	7	1	n	1	3	0	3	0	n	1	7	0	7	0	n	0.67	8	4	8	4	y	0.76	13	4	13	4	y	0.69	9	4	9	4	y	0.00893777	-5.23206	down	ENSG00000197530.13
known_NIR_33670	chr20	35739017;35739547	35739393;35740525	-	35739017	35740525	cassetteExon	ENST00000656873.1	known	0.19	10.5	46	2;19	46	y	0.19	14.5	61	8;21	61	y	0.25	17	52	12;22	52	y	0.32	23.5	50	22;25	50	y	0.32	24	50	18;30	50	y	0.37	29	50	23;35	50	y	0.0089401	4.8654	up	ENSG00000131051.24
known_NIR_43589	chr6	142544993;142596536	142596300;142637713	-	142544993	142637713	cassetteExon	ENST00000447311.1	known	-	-	-	-	-	-	1	1	0	2;0	0	n	1	1	0	2;0	0	n	0.43	3	4	0;6	4	n	0.25	3	9	6;0	9	n	0.43	3	4	2;4	4	y	0.00894873	-10.5	down	ENSG00000236366.3
novel_NIR_16476	chr12	6977745	6978421	-	6977525	6978421	A3SS	ENST00000535021.5	novel	1	2	0	2	0	y	0.83	5	1	5	1	y	-	-	-	-	-	-	0.25	1	3	1	3	n	0	0	2	0	2	n	0	0	6	0	6	n	0.00910663	-6.98671	down	ENSG00000111684.11
known_NIR_32871	chr2	85612359	85619220	+	85603081	85619220	A5SS	ENST00000491659.5	known	0.1	2	18	2	18	y	0.14	4	24	4	24	y	0.12	2	14	2	14	y	0	0	10	0	10	n	0	0	16	0	16	n	0	0	17	0	17	n	0.00913261	-10.3923	down	ENSG00000168883.20
known_NIR_16357	chr14	89955970	89963108	+	89955970;89956800	89956578;89963108	ES	ENST00000393452.7	known	0	0	4	0	2;6	n	0	0	11	0	6;16	n	0	0	2.5	0	0;5	n	0.32	4	8.5	4	0;17	n	0.44	2	2.5	2	0;5	n	0.43	3	4	3	3;5	y	0.00926172	10.3186	up	ENSG00000042088.14
known_NIR_34622	chr20	63708169	63708553	+	63708118	63708553	A5SS	ENST00000477340.5	known	0.09	4	39	4	39	y	0.06	2	32	2	32	y	0.07	3	38	3	38	y	0.03	1	35	1	35	n	0	0	77	0	77	n	0	0	32	0	32	n	0.00931898	-4.75	down	ENSG00000197114.12
known_NIR_41874	chr5	151065131	151087085	-	151065131	151080880	5pMXE	ENST00000521591.6	known	0.55	136	112	136	112	y	0.58	126	91	126	91	y	0.58	91	66	91	66	y	0.52	111	104	111	104	y	0.49	112	117	112	117	y	0.51	125	119	125	119	y	0.00931898	-4.75	down	ENSG00000145901.16
known_NIR_43964	chr6	30345228;30345573	30345491;30346432	+	30345228;30345398	30345298;30346432	MXE	ENST00000489124.5	known	0.76	333	107	5;661	196;18	y	0.79	345.5	92.5	0;691	154;31	n	0.79	281	76.5	0;562	130;23	n	0.7	281.5	120	0;563	210;30	n	0.73	318.5	117	0;637	209;25	n	0.72	339	133.5	0;678	238;29	n	0.00931898	-4.75	down	ENSG00000241370.6
novel_NIR_63996	chr8	51900446	51911420	+	51899846	51911420	A5SS	ENST00000521612.1	novel	0.15	4	23	4	23	y	0.11	2	16	2	16	n	0.15	6	33	6	33	n	0	0	28	0	28	n	0	0	20	0	20	n	0	0	18	0	18	n	0.00938437	-10.25	down	ENSG00000228801.6
known_NIR_32825	chr2	85356667	85356967	+	85355170	85356967	A5SS	ENST00000462396.5	known	0.3	6	14	6	14	y	0.23	3	10	3	10	y	0.2	1	4	1	4	n	0	0	4	0	4	n	0	0	8	0	8	n	0.1	1	9	1	9	n	0.00955995	-4.70884	down	ENSG00000115459.18
novel_NIR_46077	chr3	168027837	168029220	-	168027837	168029223	A5SS	ENST00000470487.6	novel	0	0	22	0	22	n	0	0	24	0	24	n	0	0	16	0	16	n	0.36	5	9	5	9	y	0.41	11	16	11	16	y	0.29	11	27	11	27	y	0.00956204	10.153	up	ENSG00000173905.9
known_NIR_52696	chrX	53220916	53224740	-	53220916	53221688	5pMXE	ENST00000467093.1	known	0.88	21	3	21	3	y	0.91	40	4	40	4	y	0.85	22	4	22	4	y	1	32	0	32	0	n	1	10	0	10	0	n	0.96	23	1	23	1	n	0.00957407	4.87995	up	ENSG00000126012.12
known_NIR_52623	chrX	48904892	48906392	-	48905482	48906392	A3SS	ENST00000635285.1	known	0.59	102	71	102	71	y	0.55	105	87	105	87	y	0.53	81	73	81	73	y	0.46	94	112	94	112	y	0.41	86	124	86	124	y	0.46	91	106	91	106	y	0.00959009	-4.67026	down	ENSG00000102100.16
known_NIR_12232	chr12	53295639	53296454	+	53295639	53296430	A3SS	ENST00000550880.5	known	0.5	20	20	20	20	y	0.35	12	22	12	22	y	0.44	17	22	17	22	y	0.09	5	52	5	52	y	0.11	5	41	5	41	y	0.23	9	30	9	30	y	0.00970827	-4.64356	down	ENSG00000123349.15
known_NIR_40722	chr4	74160088	74161780	+	74160088	74174506	A3SS	ENST00000429519.5	known	0.7	14	6	14	6	y	0.8	8	2	8	2	y	1	10	0	10	0	n	0.33	3	6	3	6	n	0.25	1	3	1	3	n	0.17	1	5	1	5	n	0.0097259	-5.85943	down	ENSG00000163738.19
known_NIR_30073	chr2	111429620	111479907	-	111429620	111469787	A5SS&ES	ENST00000673894.1	known	0.56	38	30	38	30	y	0.52	17	16	17	16	y	0.51	19	18	19	18	y	0.24	8	25	8	25	y	0.35	11	20	11	20	y	0.32	10	21	10	21	y	0.0097851	-6.25991	down	ENSG00000172965.17
known_NIR_35288	chr22	20052584;20056013	20055943;20063338	+	20052584;20061681	20053437;20063338	MXE	ENST00000485715.2	known	0.49	22.5	23.5	43;2	32;15	y	0.41	19.5	28	36;3	42;14	y	0.41	18	26	35;1	30;22	n	0.65	33	17.5	61;5	22;13	y	0.66	27	14	51;3	18;10	y	0.63	26	15	47;5	20;10	y	0.0098228	7.47672	up	ENSG00000183597.16
known_NIR_48455	chr8	127855319;127882185	127882062;127890589	+	127855319	127890589	cassetteExon	ENST00000661830.1	known	0	0	82	0;0	82	n	0	0	85	0;0	85	n	0	0	69	0;0	69	n	0.04	4	91	0;8	91	n	0.03	2.5	71	2;3	71	y	0.03	4	112	0;8	112	n	0.00985246	10	up	ENSG00000249859.12
known_NIR_33053	chr2	96498446	96499378	-	96498446;96499274	96499190;96499378	ES	ENST00000310865.7	known	1	97	0	97	0;0	n	1	120	0	120	0;0	n	1	68	0	68	0;0	n	0.96	124	4.5	124	5;4	y	0.97	110	3	110	6;0	n	0.97	110	3.5	110	6;1	n	0.00985246	-10	down	ENSG00000163121.10
novel_NIR_23401	chr16	28879104	28879489	-	28879107	28879489	A3SS	ENST00000561547.5	novel	0.67	4	2	4	2	y	0.86	12	2	12	2	y	1	1	0	1	0	n	0	0	7	0	7	n	0.36	5	9	5	9	y	0.2	1	4	1	4	n	0.00986899	-4.64462	down	ENSG00000260442.5
known_NIR_29036	chr19	49811699;49812335	49812251;49812996	-	49811699;49812736	49812638;49812996	MXE	ENST00000528094.5	known	0.59	43	30.5	82;4	4;57	y	0.6	48	32.5	96;0	2;63	n	0.66	29.5	15.5	56;3	0;31	n	0.78	76.5	21.5	139;14	0;43	n	0.76	62	20	106;18	0;40	n	0.74	52.5	18.5	99;6	0;37	n	0.00988003	5.79812	up	ENSG00000010361.14
novel_NIR_15663	chr12	54187902	54188726	-	54187902	54188951	A5SS	ENST00000682136.1	novel	0.5	3	3	3	3	y	0.75	3	1	3	1	y	0.58	7	5	7	5	y	0	0	5	0	5	n	0.21	3	11	3	11	y	0.21	5	19	5	19	y	0.0099172	-4.62357	down	ENSG00000123415.16
known_NIR_12370	chr12	53462567;53464852	53464760;53467221	+	53462567	53467221	cassetteExon	ENST00000549863.5	known	0.85	1024	184	1933;115	184	y	0.84	1001.5	188	1913;90	188	y	0.85	775.5	136	1484;67	136	y	0.8	952	233	1795;109	233	y	0.81	881.5	213	1680;83	213	y	0.82	888	189	1708;68	189	y	0.00996386	-5.5	down	ENSG00000197111.16
known_NIR_3133	chr1	26298062;26301053	26300926;26301694	-	26298062	26301694	cassetteExon	ENST00000374223.5	known	0.41	26	37	39;13	37	y	0.43	27.5	36	38;17	36	y	0.43	18	24	28;8	24	y	0.35	21	39	42;0	39	n	0.33	16.5	34	33;0	34	n	0.37	18.5	32	28;9	32	y	0.00996386	-5.5	down	ENSG00000158062.20
known_NIR_7395	chr11	208938	209259	+	208938	209271	A3SS	ENST00000526104.6	known	0.05	12	237	12	237	y	0.06	17	257	17	257	y	0.04	10	229	10	229	y	0.01	2	201	2	201	y	0.01	3	256	3	256	y	0.02	6	288	6	288	y	0.00996386	-5.5	down	ENSG00000177963.15
known_NIR_7445	chr11	2919407	2921352	+	2919407	2922102	A3SS	ENST00000347936.6	known	0.04	8	190	8	190	y	0.05	9	159	9	159	y	0.05	9	176	9	176	y	0.02	3	181	3	181	y	0.01	2	140	2	140	y	0	0	166	0	166	n	0.00996386	-5.5	down	ENSG00000110628.16
known_NIR_38245	chr3	41239354	41239822	+	41239354	41239660	A3SS	ENST00000642248.1	known	0.03	11	322	11	322	y	0.05	19	348	19	348	y	0.04	8	178	8	178	y	0.07	26	323	26	323	y	0.08	24	265	24	265	y	0.08	29	336	29	336	y	0.00996386	5.5	up	ENSG00000168036.18
known_NIR_18208	chr15	99256125	99287257	+	99276616	99287257	A5SS&ES	ENST00000561276.5	known	0.29	15	37	15	37	y	0.21	11	41	11	41	y	0.24	8	26	8	26	y	0.09	4	42	4	42	y	0.06	3	48	3	48	y	0.07	2	26	2	26	y	0.0100264	-6.94879	down	ENSG00000168904.15
known_NIR_10425	chr12	110496203	110499457	-	110496203	110499535	A5SS	ENST00000360579.11	known	0.03	10	288	10	288	y	0.01	4	304	4	304	y	0.03	6	214	6	214	y	0.06	14	221	14	221	y	0.06	14	223	14	223	y	0.08	23	279	23	279	y	0.0100597	4.59619	up	ENSG00000111237.19
novel_NIR_589	chr1	120427847	120428175	+	120427847	120436232	A3SS	ENST00000652355.1	novel	0.13	2	13	2	13	n	0	0	8	0	8	n	0	0	4	0	4	n	0.5	2	2	2	2	y	0.33	2	4	2	4	y	0.33	3	6	3	6	y	0.0100991	4.81287	up	ENSG00000270231.4
known_NIR_38257	chr3	42563686	42568865	-	42563980	42568865	3pMXE	ENST00000456222.1	known	0.89	99	12	99	12	y	0.92	113	10	113	10	y	0.91	92	9	92	9	y	0.86	130	21	130	21	y	0.84	87	16	87	16	y	0.86	101	16	101	16	y	0.0101537	-4.82418	down	ENSG00000093183.14
novel_NIR_4358	chr1	28560920	28561113	+	28560732	28561113	A5SS	ENST00000495995.5	novel	0.67	4	2	4	2	y	0.5	4	4	4	4	y	0.5	4	4	4	4	y	0	0	17	0	17	n	0	0	6	0	6	n	0	0	13	0	13	n	0.0102042	-9.82353	down	ENSG00000180098.9
novel_NIR_46096	chr3	170868387	170869965	-	170868390	170869965	A3SS	ENST00000466674.5	novel	0.17	1	5	1	5	n	0.07	1	14	1	14	n	0	0	8	0	8	n	0.67	4	2	4	2	y	-	-	-	-	-	-	0.56	5	4	5	4	y	0.0102339	7.24142	up	ENSG00000163584.18
known_NIR_26798	chr19	17406296;17413305	17413097;17420313	+	17406296	17420313	cassetteExon	ENST00000528911.5	known	0.71	19.5	8	35;4	8	y	0.74	28.5	10	46;11	10	y	0.76	31	10	54;8	10	y	0.83	28.5	6	49;8	6	y	0.81	44	10	68;20	10	y	0.84	32.5	6	57;8	6	y	0.0103029	5.29514	up	ENSG00000141971.13
novel_NIR_6699	chr10	102450330	102452066	+	102450330	102451399	A3SS	ENST00000494270.7	novel	-	-	-	-	-	-	0	0	4	0	4	n	0	0	2	0	2	n	0.71	5	2	5	2	y	0.8	4	1	4	1	y	1	5	0	5	0	y	0.0103296	9.76277	up	ENSG00000269609.6
novel_NIR_9760	chr11	126409411	126413508	+	126409411	126413397	A3SS	ENST00000533826.1	novel	1	13	0	13	0	y	1	3	0	3	0	y	1	1	0	1	0	n	0.2	1	4	1	4	n	0	0	3	0	3	n	0.29	2	5	2	5	y	0.0103296	-9.76277	down	ENSG00000110080.20
known_NIR_17228	chr15	60386086;60393440	60393013;60397943	-	60386086;60396427	60396373;60397943	MXE	ENST00000558558.6	known	0.27	1.5	4	1;2	2;6	n	0.38	3	5	6;0	2;8	n	0.45	2.5	3	5;0	3;3	n	0.94	15	1	28;2	0;2	n	0.76	6.5	2	6;7	0;4	n	0.7	11.5	5	17;6	5;5	y	0.0103863	4.86172	up	ENSG00000182718.18
known_NIR_45528	chr7	107564209	107567050	+	107564209;107564676	107564588;107567050	ES	ENST00000422290.5	known	0.09	3	29	3	13;45	y	0.11	3	24.5	3	7;42	y	0	0	18	0	8;28	n	0.28	8	21	8	11;31	y	0.31	13	28.5	13	22;35	y	0.22	4	14.5	4	4;25	y	0.0104091	4.73452	up	ENSG00000105865.11
novel_NIR_66200	chr9	35660647	35660771	+	35660647	35660766	A3SS	ENST00000327351.6	novel	0.8	28	7	28	7	y	0.71	15	6	15	6	y	0.64	9	5	9	5	y	0.5	9	9	9	9	y	0.44	7	9	7	9	y	0.36	5	9	5	9	y	0.0104247	-4.60301	down	ENSG00000159884.12
known_NIR_32720	chr2	74421816	74422870	+	74422375	74422870	A5SS	ENST00000482880.5	known	0.42	40	56	40	56	y	0.35	40	75	40	75	y	0.4	34	52	34	52	y	0.28	37	93	37	93	y	0.19	28	117	28	117	y	0.23	26	88	26	88	y	0.0104334	-4.7	down	ENSG00000005448.17
known_NIR_9196	chr11	67464856	67467312	-	67464856	67465056	5pMXE	ENST00000535175.5	known	0.02	2	104	2	104	y	0	0	90	0	90	n	0.03	2	72	2	72	y	0.07	10	125	10	125	y	0.09	9	93	9	93	y	0.06	5	81	5	81	y	0.0104697	4.54344	up	ENSG00000172663.9
novel_NIR_1793	chr1	156745373	156748289	-	156745373	156752229	A5SS	ENST00000368206.5	novel	0.2	15	61	15	61	y	0.24	20	64	20	64	y	0.2	14	57	14	57	y	0.1	9	78	9	78	n	0.15	8	46	8	46	y	0.12	14	106	14	106	n	0.0104869	-4.56383	down	ENSG00000143321.19
known_NIR_16414	chr14	91283517	91289105	-	91283517;91285836	91285395;91289105	ES	ENST00000556726.5	known	0.56	5	4	5	6;2	y	0.71	6	2.5	6	3;2	y	0.67	1	0.5	1	0;1	n	0.24	2	6.5	2	13;0	n	0.25	3	9	3	14;4	y	0.27	3	8	3	12;4	y	0.0105017	-8.60603	down	ENSG00000015133.19
novel_NIR_57493	chr7	107613732	107621630	+	107613432	107621630	A5SS	ENST00000491150.5	novel	0.16	23	121	23	121	y	0.14	29	181	29	181	n	0.13	24	160	24	160	n	0.09	16	158	16	158	n	0.1	14	122	14	122	n	0.08	13	157	13	157	n	0.0105551	-5.05964	down	ENSG00000075790.12
known_NIR_48963	chr8	143590738	143592647	-	143586852	143592647	A3SS	ENST00000531218.6	known	-	-	-	-	-	-	0	0	4	0	4	n	0	0	2	0	2	n	0.71	5	2	5	2	n	1	1	0	1	0	n	0.79	11	3	11	3	y	0.0105971	9.63679	up	ENSG00000104529.18
known_NIR_4706	chr1	77713281	77715742	-	77713281	77714614	5pMXE	ENST00000472462.1	known	0	0	66	0	66	n	0.03	2	77	2	77	y	0	0	49	0	49	n	0.08	4	45	4	45	y	0.06	3	47	3	47	y	0.1	6	52	6	52	y	0.0106574	4.58258	up	ENSG00000077254.14
known_NIR_35211	chr22	19142894	19144057	-	19142894	19144506	A5SS	ENST00000252137.11	known	0.03	3	85	3	85	y	0.03	3	88	3	88	y	0	0	77	0	77	n	0.11	8	64	8	64	y	0.09	10	97	10	97	y	0.07	4	53	4	53	y	0.0106574	4.58258	up	ENSG00000100056.12
known_NIR_38710	chr3	49172801	49174239	+	49173145	49174239	A5SS	ENST00000332780.4	known	0.03	1	29	1	29	n	0	0	39	0	39	n	0	0	33	0	33	n	0.1	2	18	2	18	y	0.06	2	32	2	32	y	0.08	2	23	2	23	y	0.0106574	4.58258	up	ENSG00000185909.15
novel_NIR_30620	chr18	23784157	23784652	+	23784157	23810366	A3SS	ENST00000313654.14	novel	0.69	9	4	9	4	y	0.61	20	13	20	13	y	0.53	10	9	10	9	y	0	0	11	0	11	n	0.11	3	24	3	24	n	0.27	4	11	4	11	y	0.0106893	-5.31239	down	ENSG00000053747.17
known_NIR_1280	chr1	155672731	155676548	-	155672731	155675010	5pMXE	ENST00000488784.5	known	0.04	4	108	4	108	y	0.06	8	117	8	117	y	0.04	4	87	4	87	y	0.01	2	160	2	160	y	0	0	126	0	126	n	0	0	163	0	163	n	0.0107001	-5.81378	down	ENSG00000163374.20
known_NIR_14244	chr13	49661208	49691254	-	49661208;49669846	49669777;49691254	ES	ENST00000378272.9	known	0.1	37	324	37	50;598	y	0.09	38	374	38	29;719	y	0.09	21	221.5	21	23;420	y	0.13	43	292.5	43	26;559	y	0.13	48	311	48	26;596	y	0.15	59	342	59	62;622	y	0.0107001	5.81378	up	ENSG00000123179.14
novel_NIR_20379	chr15	22838947	22851639	+	22845267	22851639	A5SS&ES	ENST00000398014.7	novel	0.06	3	44	3	44	n	0	0	50	0	50	n	0	0	35	0	35	n	0.22	12	42	12	42	y	0.14	8	50	8	50	n	0.15	5	29	5	29	y	0.0107505	4.66628	up	ENSG00000140157.16
known_NIR_34889	chr21	39345274;39347292	39347247;39348292	-	39345274;39347483	39345830;39348292	MXE	ENST00000485550.5	known	0.15	13.5	78	21;6	130;26	y	0.14	11.5	72	21;2	119;25	y	0.17	10.5	52.5	20;1	75;30	n	0.1	8.5	80.5	16;1	127;34	n	0.06	4	68.5	7;1	114;23	n	0.06	6	101.5	8;4	151;52	y	0.0107603	-5.00435	down	ENSG00000205581.11
novel_NIR_30007	chr17	81665584	81666164	-	81665584	81666155	A5SS	ENST00000571757.1	novel	0	0	20	0	20	n	0.08	1	12	1	12	n	0	0	13	0	13	n	0.2	6	24	6	24	y	0.32	12	25	12	25	y	0.22	9	32	9	32	y	0.0108786	4.81354	up	ENSG00000204237.5
novel_NIR_65931	chr9	21011438	21011589	-	21008146	21011589	A3SS	ENST00000495827.3	novel	0.24	10	31	10	31	y	0.28	13	34	13	34	y	0.17	8	39	8	39	y	0.42	17	23	17	23	n	0.55	34	28	34	28	n	0.44	17	22	17	22	n	0.0108864	4.64758	up	ENSG00000188921.14
known_NIR_6905	chr11	122904444	122924897	+	122904444	122905172	3pMXE	ENST00000307257.10	known	1	5	0	5	0	n	0.64	14	8	14	8	y	0.75	6	2	6	2	n	0	0	2	0	2	n	0	0	8	0	8	n	0.33	2	4	2	4	n	0.010977	-4.48462	down	ENSG00000109944.11
known_NIR_10142	chr12	10213219	10213836	+	10213219	10220440	A3SS	ENST00000545047.5	known	1	40	0	40	0	n	1	29	0	29	0	n	1	28	0	28	0	n	0.92	12	1	12	1	n	0.93	25	2	25	2	y	0.9	19	2	19	2	y	0.0110153	-9.44911	down	ENSG00000139112.11
known_NIR_9546	chr11	74158694	74161399	-	74139828	74161399	A3SS	ENST00000442398.7	known	0.8	4	1	4	1	n	0.5	4	4	4	4	n	0.79	11	3	11	3	y	0.25	6	18	6	18	y	0.1	2	18	2	18	y	0	0	5	0	5	n	0.011034	-4.74271	down	ENSG00000168014.18
novel_NIR_41100	chr20	3758678;3759447	3759308;3760007	-	3758678	3760007	cassetteExon	ENST00000217195.12	novel	0.17	2.5	12	2;3	12	y	0.11	2	16	4;0	16	n	0.14	2	12	4;0	12	n	0	0	16	0;0	16	n	0	0	37	0;0	37	n	0.06	0.5	8	1;0	8	n	0.0110375	-4.53557	down	ENSG00000101220.18
novel_NIR_46061	chr3	165511651	165513840	+	165511651	165539065	A3SS	ENST00000655586.1	novel	0.38	8	13	8	13	y	0.29	10	24	10	24	y	0.31	5	11	5	11	y	0.56	22	17	22	17	y	0.48	15	16	15	16	y	0.47	35	40	35	40	y	0.0110419	4.47932	up	ENSG00000244128.7
novel_NIR_66002	chr9	21994053	21994547	-	21994053	21994821	A5SS	ENST00000494262.5	novel	0.43	3	4	3	4	y	0.62	5	3	5	3	y	0.71	5	2	5	2	y	0.18	2	9	2	9	y	0.1	1	9	1	9	n	0	0	8	0	8	n	0.0111756	-5.05558	down	ENSG00000147889.18
novel_NIR_61672	chr8	102930518	102930742	+	102930518	102937624	A3SS	ENST00000517996.5	novel	0	0	5	0	5	n	0	0	5	0	5	n	0	0	6	0	6	n	0.33	1	2	1	2	n	0.43	9	12	9	12	y	0.48	10	11	10	11	y	0.0111907	9.37352	up	ENSG00000253320.7
novel_NIR_55678	chr6	33272122	33272635	+	33272122	33272587	A3SS	ENST00000474973.5	novel	0	0	45	0	45	n	0.06	2	33	2	33	n	0	0	26	0	26	n	0.14	4	25	4	25	n	0.19	13	55	13	55	y	0.24	8	26	8	26	y	0.0112016	4.84071	up	ENSG00000231500.7
novel_NIR_35016	chr19	53449638	53451774	+	53449638	53460915	A3SS	ENST00000651864.1	novel	0	0	1	0	1	n	0.29	4	10	4	10	y	0	0	4	0	4	n	1	2	0	2	0	y	-	-	-	-	-	-	1	2	0	2	0	y	0.0112583	9.34483	up	ENSG00000160336.17
known_NIR_19486	chr16	4673657	4681550	+	4673657;4677572	4677463;4681550	ES	ENST00000415496.5	known	0.06	2	32	2	52;12	y	0	0	38	0	60;16	n	0	0	32	0	56;8	n	0.17	9	45.5	9	77;14	y	0.14	4	24	4	36;12	y	0.15	6	33	6	56;10	y	0.0113384	6.09994	up	ENSG00000102858.13
known_NIR_10556	chr12	111991889;112003863	112003800;112005257	-	111991889	112005257	cassetteExon	ENST00000550831.7	known	0.75	15	5	16;14	5	y	0.86	35.5	6	31;40	6	y	0.85	17.5	3	17;18	3	y	0.57	13.5	10	14;13	10	y	0.56	15.5	12	17;14	12	y	0.67	22.5	11	27;18	11	y	0.0114253	-4.42963	down	ENSG00000198270.13
known_NIR_5732	chr10	35127193;35179276	35178889;35206895	+	35127193	35206895	cassetteExon	ENST00000474362.5	known	0.96	22.5	1	21;24	1	n	1	32	0	24;40	0	n	1	17	0	11;23	0	n	0.93	26.5	2	13;40	2	y	0.89	15.5	2	18;13	2	y	0.9	26.5	3	22;31	3	y	0.0114624	-4.45669	down	ENSG00000095794.19
known_NIR_23775	chr17	7447650	7454297	+	7447650;7448788	7448579;7454297	ES	ENST00000306071.7	known	0	0	7	0	4;10	n	0	0	7	0	6;8	n	0	0	6	0	4;8	n	0.35	3	5.5	3	9;2	y	0.24	2	6.5	2	10;3	y	0.29	2	5	2	7;3	y	0.0115479	9.22491	up	ENSG00000170175.11
known_NIR_45511	chr7	106775200	106823064	+	106775200	106779995	3pMXE	ENST00000650196.1	known	0.73	35	13	35	13	y	0.77	27	8	27	8	y	0.76	35	11	35	11	y	0.82	64	14	64	14	y	0.84	31	6	31	6	y	0.82	45	10	45	10	y	0.0115935	5.33578	up	ENSG00000228742.11
novel_NIR_60572	chr7	72831798	72832027	+	72831798	72836577	A3SS	ENST00000423945.5	novel	0.06	1	17	1	17	n	0.04	1	23	1	23	n	0	0	8	0	8	n	0.15	2	11	2	11	y	0.11	2	17	2	17	n	0.17	1	5	1	5	n	0.0116023	4.40981	up	ENSG00000225648.5
novel_NIR_55356	chr6	30689452	30690524	-	30689452	30690047	A5SS&ES	ENST00000444096.5	novel	0.04	2	50	2	50	n	0.07	4	57	4	57	n	0	0	46	0	46	n	0.13	8	52	8	52	n	0.15	10	55	10	55	y	0.19	9	39	9	39	y	0.0116056	4.46525	up	ENSG00000137404.15
known_NIR_23370	chr17	60214774	60219628	-	60214774	60219670	A5SS	ENST00000300896.9	known	1	6	0	6	0	n	0.71	10	4	10	4	y	1	2	0	2	0	n	0.25	1	3	1	3	n	0.25	2	6	2	6	n	0.5	5	5	5	5	y	0.0116636	-4.46611	down	ENSG00000170832.13
known_NIR_44398	chr6	32976936	32977417	+	32976936	32977260	A3SS	ENST00000678778.1	known	0.23	5	17	5	17	y	0.22	7	25	7	25	y	0.3	7	16	7	16	y	0	0	33	0	33	n	0	0	29	0	29	n	0.11	5	42	5	42	y	0.0116729	-4.797	down	ENSG00000204256.14
known_NIR_23774	chr17	7447650	7454297	+	7447650	7448579	A3SS&ES	ENST00000576360.1	known	0	0	4	0	4	n	0	0	6	0	6	n	0	0	4	0	4	n	0.25	3	9	3	9	y	0.17	2	10	2	10	y	0.22	2	7	2	7	n	0.0117524	9.14286	up	ENSG00000170175.11
novel_NIR_33167	chr19	36594299	36594396	+	36594299	36594442	A3SS	ENST00000475219.6	novel	0	0	4	0	4	n	0.14	2	12	2	12	n	0	0	7	0	7	n	0.67	4	2	4	2	y	0.67	2	1	2	1	y	1	1	0	1	0	n	0.0117716	6.13721	up	ENSG00000233527.9
novel_NIR_49283	chr4	152807248;152809238	152809190;152809673	+	152807248	152809673	cassetteExon	ENST00000510831.5	novel	1	4.5	0	2;7	0	y	1	3.5	0	4;3	0	y	1	3	0	2;4	0	y	0.17	1	5	1;1	5	n	0.43	1.5	2	1;2	2	n	0.33	2.5	5	5;0	5	n	0.011829	-9.11267	down	ENSG00000164144.16
novel_NIR_15861	chr12	56160320	56161389	+	56160320	56162264	A3SS	ENST00000547408.5	novel	0	0	19	0	19	n	0	0	33	0	33	n	0	0	41	0	41	n	0.58	59	43	59	43	y	0.78	98	28	98	28	y	0.56	39	31	39	31	y	0.011831	9.11192	up	ENSG00000092841.19
novel_NIR_887	chr1	148433629	148435146	-	148433643	148435146	A3SS	ENST00000639159.1	novel	0	0	39	0	39	n	0	0	31	0	31	n	0.09	2	20	2	20	n	0.24	11	35	11	35	y	0.21	3	11	3	11	y	0.16	4	21	4	21	y	0.0118466	4.5607	up	ENSG00000274020.4
known_NIR_43890	chr6	2959342	2971491	-	2959342	2971533	A5SS	ENST00000380539.7	known	0.16	23	124	23	124	y	0.13	16	109	16	109	y	0.16	20	106	20	106	y	0.3	36	86	36	86	y	0.24	34	107	34	107	y	0.25	28	85	28	85	y	0.0118657	5.37587	up	ENSG00000124570.21
known_NIR_19170	chr16	3065710	3065781	+	3065687	3065781	A5SS	ENST00000530538.6	known	0.73	8	3	8	3	y	0.67	18	9	18	9	y	0.6	12	8	12	8	y	0.21	7	26	7	26	y	0.3	6	14	6	14	y	0.42	17	23	17	23	y	0.0120085	-4.9889	down	ENSG00000008517.19
known_NIR_24731	chr17	8174272	8176200	-	8176026	8176200	A3SS&ES	ENST00000532998.5	known	0.25	13	40	13	40	y	0.29	12	30	12	30	y	0.34	11	21	11	21	y	0.1	6	52	6	52	y	0.18	12	53	12	53	y	0.14	12	73	12	73	y	0.0120101	-4.406	down	ENSG00000179029.15
known_NIR_29204	chr19	52374427	52383849	+	52374427	52379421	3pMXE	ENST00000600321.5	known	0.3	18	42	18	42	y	0.24	11	34	11	34	y	0.2	10	40	10	40	y	0.05	2	42	2	42	y	0.02	1	49	1	49	n	0.05	2	42	2	42	y	0.0120931	-6.72484	down	ENSG00000221923.9
known_NIR_10708	chr12	118401820	118403412	+	118401820;118402004	118401983;118403412	ES	ENST00000543473.2	known	0	0	21	0	22;20	n	0	0	29	0	31;27	n	0	0	27	0	31;23	n	0.08	2	22.5	2	19;26	y	0.08	2	24	2	23;25	y	0.11	4	32.5	4	34;31	y	0.0121217	9	up	ENSG00000111707.12
novel_NIR_40534	chr20	2658522	2658627	-	2658522	2658638	A5SS	ENST00000466494.6	novel	0.25	16	47	16	47	y	0.19	8	35	8	35	y	0.21	10	38	10	38	y	0.04	2	52	2	52	n	0	0	36	0	36	n	0.1	5	44	5	44	n	0.0122297	-5.00096	down	ENSG00000101365.21
novel_NIR_20376	chr15	22838947	22851639	+	22838947;22845267	22845146;22851639	ES	ENST00000359727.8	novel	0.11	3	24	3	4;44	n	0	0	25	0	0;50	n	0	0	17.5	0	0;35	n	0.36	12	21	12	0;42	y	0.22	8	28	8	6;50	y	0.26	5	14.5	5	0;29	y	0.0122416	4.38614	up	ENSG00000140157.16
known_NIR_35550	chr22	28724923	28725243	-	28725124	28725243	3pMXE	ENST00000454252.1	known	0.13	13	90	13	90	y	0.13	13	90	13	90	y	0.17	13	65	13	65	y	0.07	5	64	5	64	y	0.08	7	78	7	78	y	0.05	6	108	6	108	y	0.0122823	-4.79583	down	ENSG00000183765.23
known_NIR_30177	chr2	119367214	119367559	+	119367060	119367559	A5SS	ENST00000409094.5	known	0.4	6	9	6	9	y	0.44	8	10	8	10	y	0.31	4	9	4	9	y	0.12	1	7	1	7	n	0	0	18	0	18	n	0.17	2	10	2	10	y	0.0124568	-4.52006	down	ENSG00000155368.17
known_NIR_33710	chr20	36236782	36239821	+	36236966	36239821	A5SS	ENST00000680811.1	known	0.07	1	13	1	13	n	0	0	8	0	8	n	0	0	7	0	7	n	0.19	6	26	6	26	y	0.33	2	4	2	4	n	0.29	8	20	8	20	y	0.0125085	5.16838	up	ENSG00000131043.13
known_NIR_26467	chr19	14093237	14097361	-	14093792	14097361	3pMXE	ENST00000588209.5	known	0.02	2	93	2	93	y	0.02	2	125	2	125	y	0	0	108	0	108	n	0.05	7	147	7	147	y	0.08	10	110	10	110	y	0.06	7	119	7	119	y	0.0125409	4.52267	up	ENSG00000072062.15
known_NIR_45871	chr7	134418219;134418974	134418627;134432314	-	134418219	134432314	cassetteExon	ENST00000656533.1	known	0.94	68.5	4	4;133	4	y	0.94	59.5	4	2;117	4	y	0.92	45	4	0;90	4	n	0.97	61	2	0;122	2	n	0.98	60	1	2;118	1	n	1	66	0	5;127	0	n	0.0125409	4.52267	up	ENSG00000273297.2
novel_NIR_53154	chr5	60945428	61045840	+	61045604	61045840	A5SS&ES	ENST00000677756.1	novel	0	0	10	0	10	n	0	0	1	0	1	n	0	0	2	0	2	n	1	6	0	6	0	y	0.86	6	1	6	1	y	0.67	6	3	6	3	y	0.0126148	8.81903	up	ENSG00000164182.12
known_NIR_11778	chr12	47963704	47964209	+	47963633	47964209	A5SS	ENST00000550146.5	known	0.29	57	141	57	141	y	0.3	68	160	68	160	y	0.33	57	117	57	117	y	0.24	53	166	53	166	y	0.23	47	154	47	154	y	0.19	55	232	55	232	y	0.0126157	-4.45896	down	ENSG00000134291.12
known_NIR_10555	chr12	111991889	112005257	-	112003863	112005257	3pMXE	ENST00000552800.2	known	0.26	5	14	5	14	y	0.13	6	40	6	40	y	0.14	3	18	3	18	y	0.43	10	13	10	13	y	0.46	12	14	12	14	y	0.38	11	18	11	18	y	0.0126566	5.15582	up	ENSG00000198270.13
known_NIR_32263	chr2	46543188	46576087	+	46543812	46576087	5pMXE	ENST00000482449.2	known	0.33	9	18	9	18	y	0.21	7	26	7	26	y	0.26	8	23	8	23	y	0	0	25	0	25	n	0.03	1	30	1	30	n	0	0	36	0	36	n	0.0126607	-7.08842	down	ENSG00000119729.12
known_NIR_39257	chr3	75432870	75434918	-	75432870	75434725	A5SS	ENST00000497543.5	known	1	29	0	29	0	n	0.94	51	3	51	3	y	1	26	0	26	0	n	0.89	42	5	42	5	y	0.81	39	9	39	9	y	0.83	24	5	24	5	y	0.0128532	-4.37061	down	ENSG00000244026.6
known_NIR_16514	chr14	94388660	94388819	-	94388660	94388801	A5SS	ENST00000636712.1	known	0.11	1	8	1	8	n	0.2	3	12	3	12	y	0	0	9	0	9	n	0.43	3	4	3	4	n	0.5	1	1	1	1	n	0.38	5	8	5	8	y	0.0128557	4.93865	up	ENSG00000197249.14
known_NIR_47523	chr7	76030527	76047812	-	76030524	76047812	A3SS	ENST00000340062.9	known	0.33	105	213	105	213	y	0.36	114	206	114	206	y	0.35	95	180	95	180	y	0.29	109	267	109	267	y	0.31	99	220	99	220	y	0.28	90	231	90	231	y	0.0128867	-4.27618	down	ENSG00000127952.17
known_NIR_18924	chr16	28836122	28836751	+	28836122	28836728	A3SS	ENST00000340394.12	known	0.5	74	74	74	74	y	0.52	57	53	57	53	y	0.55	82	68	82	68	y	0.45	95	115	95	115	y	0.39	50	78	50	78	y	0.43	58	77	58	77	y	0.0128999	-4.37595	down	ENSG00000168488.19
known_NIR_4492	chr1	61723772	61724920	-	61723772	61724288	A5SS&ES	ENST00000488206.5	known	0.8	8	2	8	2	y	1	9	0	9	0	n	1	3	0	3	0	n	-	-	-	-	-	-	0.4	2	3	2	3	n	0.43	6	8	6	8	y	0.0129405	-7.58537	down	ENSG00000162604.12
known_NIR_1098	chr1	155060832;155061646	155061415;155062245	+	155060832;155061975	155061904;155062245	MXE	ENST00000359280.8	known	0.26	37	105.5	63;11	74;137	y	0.3	47	108	89;5	95;121	y	0.28	37.5	96.5	65;10	63;130	y	0.2	27	108.5	50;4	62;155	y	0.21	30	111.5	42;18	64;159	y	0.22	32	112.5	57;7	83;142	y	0.0129527	-5.42218	down	ENSG00000143537.14
novel_NIR_33404	chr19	39483156	39483560	+	39483156	39485688	A3SS	ENST00000601358.5	novel	0	0	14	0	14	n	0	0	13	0	13	n	0	0	20	0	20	n	0.12	2	15	2	15	n	0.16	3	16	3	16	y	0.18	3	14	3	14	y	0.0129755	8.69318	up	ENSG00000105197.11
known_NIR_3920	chr1	43365623	43367051	-	43365623	43366268	5pMXE	ENST00000470769.5	known	0.15	2	11	2	11	y	0.21	6	23	6	23	y	0.24	4	13	4	13	y	0	0	20	0	20	n	0.06	1	17	1	17	n	0.08	1	12	1	12	n	0.0130044	-4.28952	down	ENSG00000066322.15
known_NIR_13479	chr12	7115219	7118899	+	7115219;7118677	7115386;7118899	ES	ENST00000541775.5	known	0	0	6.5	0	2;11	n	0.11	1	8.5	1	0;17	n	0	0	5.5	0	0;11	n	0.46	3	3.5	3	0;7	n	0.77	10	3	10	2;4	y	0.67	2	1	2	1;1	n	0.0130426	6.0617	up	ENSG00000205885.7
known_NIR_52555	chrX	48512852	48514240	+	48511935	48514240	A5SS	ENST00000472520.5	known	0.9	9	1	9	1	n	1	5	0	5	0	n	1	5	0	5	0	n	0.33	2	4	2	4	n	0.4	4	6	4	6	y	0.6	6	4	6	4	y	0.0130528	-5.98122	down	ENSG00000102312.24
known_NIR_51562	chr9	96958897	97013259	-	96958897	96972853	5pMXE	ENST00000637076.1	known	0	0	44	0	44	n	0	0	69	0	69	n	0	0	62	0	62	n	0.04	2	52	2	52	y	0.05	3	59	3	59	y	0.06	3	45	3	45	y	0.0130725	8.66025	up	ENSG00000196312.15
known_NIR_5752	chr10	35195214	35206895	+	35179276	35206895	A5SS	ENST00000374721.7	known	0.25	8	24	8	24	y	0.23	12	40	12	40	y	0.34	12	23	12	23	y	0.02	1	40	1	40	n	0	0	13	0	13	n	0	0	31	0	31	n	0.0131361	-7.73389	down	ENSG00000095794.19
known_NIR_165	chr1	109620278;109621266	109620914;109625303	+	109620278	109625303	cassetteExon	ENST00000531734.6	known	0.02	0.5	23	1;0	23	n	0.06	2.5	39	0;5	39	n	0.08	2.5	30	0;5	30	n	0.19	6	25	0;12	25	n	0.14	5.5	35	2;9	35	y	0.14	4	24	2;6	24	y	0.0131624	4.25818	up	ENSG00000116337.20
known_NIR_29722	chr19	6744994;6746196	6746029;6746452	+	6744994	6746452	cassetteExon	ENST00000600428.5	known	0.07	28.5	402	23;34	402	y	0.09	36.5	389	34;39	389	y	0.08	26	291	19;33	291	y	0.11	56.5	456	60;53	456	y	0.11	44.5	353	48;41	353	y	0.12	45.5	350	50;41	350	y	0.0131721	5	up	ENSG00000125733.18
known_NIR_43417	chr6	125292909;125298816	125298714;125300538	-	125292909	125300538	cassetteExon	ENST00000609477.5	known	0.63	368.5	213	351;386	213	y	0.63	341	203	271;411	203	y	0.64	303	171	296;310	171	y	0.61	335.5	215	331;340	215	y	0.6	329.5	220	330;329	220	y	0.59	338.5	231	348;329	231	y	0.0131721	-5	down	ENSG00000111906.18
known_NIR_48382	chr8	127794734	127890589	+	127796071	127890589	5pMXE	ENST00000661160.1	known	0.89	436	56	436	56	y	0.91	550	56	550	56	y	0.9	410	48	410	48	y	0.87	492	74	492	74	y	0.86	529	84	529	84	y	0.87	498	74	498	74	y	0.0131721	-5	down	ENSG00000249859.12
known_NIR_5494	chr10	133355505	133355738	-	133355436	133355738	A3SS	ENST00000278025.9	known	0.23	70	230	70	230	y	0.23	85	283	85	283	y	0.21	62	235	62	235	y	0.27	74	197	74	197	y	0.27	108	293	108	293	y	0.25	84	254	84	254	y	0.0132356	4.24264	up	ENSG00000148803.12
known_NIR_9169	chr11	67400919	67401728	-	67400919	67401068	A5SS&ES	ENST00000537694.2	known	0.06	59	995	59	995	y	0.06	75	1155	75	1155	y	0.07	72	892	72	892	y	0.04	47	1049	47	1049	y	0.04	51	1144	51	1144	y	0.05	69	1206	69	1206	y	0.0132356	-4.24264	down	ENSG00000172531.16
known_NIR_9323	chr11	68898012	68900548	-	68898012	68900535	A5SS	ENST00000450904.6	known	0.91	945	93	945	93	y	0.9	1056	112	1056	112	y	0.91	798	78	798	78	y	0.89	850	110	850	110	y	0.88	965	132	965	132	y	0.89	1143	140	1143	140	y	0.0132356	-4.24264	down	ENSG00000197345.13
known_NIR_10278	chr12	10710114	10713211	-	10710788	10713211	3pMXE	ENST00000544622.4	known	0.85	1206	211	1206	211	y	0.86	1308	220	1308	220	y	0.85	953	174	953	174	y	0.83	1108	224	1108	224	y	0.84	1182	217	1182	217	y	0.83	1234	254	1234	254	y	0.0132356	-4.24264	down	ENSG00000060138.13
known_NIR_13982	chr13	27622009	27622841	+	27622009	27648379	A3SS	ENST00000399697.7	known	0.04	10	272	10	272	y	0.04	16	360	16	360	y	0.03	7	210	7	210	y	0.02	7	292	7	292	y	0.02	8	374	8	374	y	0.01	3	379	3	379	y	0.0132356	-4.24264	down	ENSG00000186184.19
known_NIR_18071	chr15	89305698	89306010	+	89305698	89306007	A3SS	ENST00000674831.1	known	0.01	1	158	1	158	n	0	0	195	0	195	n	0	0	119	0	119	n	0.03	5	168	5	168	y	0.02	2	123	2	123	y	0.02	3	128	3	128	y	0.0132356	4.24264	up	ENSG00000140525.19
known_NIR_19790	chr16	57457015	57458246	+	57452936	57458246	A5SS	ENST00000565964.5	known	0.98	394	10	394	10	y	0.97	441	15	441	15	y	0.98	376	8	376	8	y	0.99	347	2	347	2	y	1	394	0	394	0	n	1	455	2	455	2	y	0.0132356	4.24264	up	ENSG00000088682.14
known_NIR_19983	chr16	66552793	66563122	+	66552793	66563072	A3SS	ENST00000534692.1	known	0.97	375	10	375	10	y	0.98	413	9	413	9	y	0.98	301	5	301	5	y	1	400	1	400	1	n	0.99	393	2	393	2	y	1	477	0	477	0	n	0.0132356	4.24264	up	ENSG00000217555.13
known_NIR_21136	chr16	89873859;89878627	89878461;89883351	+	89873859	89883351	cassetteExon	ENST00000640279.1	known	0.03	9.5	331	12;7	331	y	0.04	14	338	4;24	338	y	0.04	12	273	9;15	273	y	0.06	22.5	357	15;30	357	y	0.05	18.5	376	12;25	376	y	0.06	22	334	14;30	334	y	0.0132356	4.24264	up	ENSG00000141002.20
known_NIR_22690	chr17	4539967	4541463	-	4540484	4541463	3pMXE	ENST00000575662.1	known	0.04	15	358	15	358	y	0.05	23	432	23	432	y	0.04	12	259	12	259	y	0.03	10	365	10	365	y	0.02	10	401	10	401	y	0.02	9	386	9	386	y	0.0132356	-4.24264	down	ENSG00000132382.15
known_NIR_24958	chr17	8206639	8207318	-	8206639	8206750	A5SS&ES	ENST00000316199.10	known	0.03	17	549	17	549	y	0.04	23	537	23	537	y	0.04	24	516	24	516	y	0.05	25	456	25	456	y	0.06	33	531	33	531	y	0.06	34	575	34	575	y	0.0132356	4.24264	up	ENSG00000178999.13
known_NIR_25193	chr17	9378653	9437797	-	9378653	9491829	A5SS	ENST00000306357.9	known	0.02	8	395	8	395	y	0.03	14	399	14	399	y	0.02	4	252	4	252	y	0.01	3	316	3	316	y	0	2	440	2	440	y	0	2	402	2	402	y	0.0132356	-4.24264	down	ENSG00000170310.15
known_NIR_25588	chr18	36797050	36798449	-	36786982	36798449	A3SS	ENST00000591906.5	known	0.94	323	19	323	19	y	0.95	254	12	254	12	y	0.95	243	12	243	12	y	0.96	236	11	236	11	y	0.97	270	8	270	8	y	0.97	188	5	188	5	y	0.0132356	4.24264	up	ENSG00000134779.15
known_NIR_29050	chr19	49836406	49838580	+	49836406	49836847	3pMXE	ENST00000312865.10	known	0.05	8	163	8	163	y	0.05	8	166	8	166	y	0.04	5	111	5	111	y	0.07	11	148	11	148	y	0.07	13	187	13	187	y	0.06	8	121	8	121	y	0.0132356	4.24264	up	ENSG00000104973.19
known_NIR_29324	chr19	54449744	54451290	+	54449306	54451290	A5SS	ENST00000439657.5	known	0.08	3	36	3	36	y	0.05	1	20	1	20	n	0.08	2	24	2	24	y	0	0	53	0	53	n	0.03	1	35	1	35	n	0	0	22	0	22	n	0.0132356	-4.24264	down	ENSG00000167615.17
known_NIR_30886	chr2	202214434	202238440	-	202214434;202220106	202220032;202238440	ES	ENST00000392246.7	known	0.01	3	593	3	581;605	y	0	2	635	2	600;670	y	0	0	407	0	419;395	n	0.02	9	563.5	9	565;562	y	0.03	16	519	16	501;537	y	0.02	12	586.5	12	600;573	y	0.0132356	4.24264	up	ENSG00000116030.17
known_NIR_32085	chr2	3472602	3477695	+	3465695	3477695	A5SS	ENST00000382110.6	known	0.02	8	477	8	477	y	0.03	10	387	10	387	y	0.03	9	252	9	252	y	0.01	4	384	4	384	y	0.01	7	469	7	469	y	0	2	455	2	455	y	0.0132356	-4.24264	down	ENSG00000171853.16
known_NIR_32581	chr2	71068336	71070502	+	71068712	71070502	A5SS	ENST00000497690.1	known	0.02	2	97	2	97	y	0	0	94	0	94	n	0.02	1	46	1	46	n	0.06	5	85	5	85	y	0.04	4	91	4	91	y	0.06	6	90	6	90	y	0.0132356	4.24264	up	ENSG00000124357.13
known_NIR_33449	chr20	32359334	32366384	+	32358832	32366384	A5SS	ENST00000651418.1	known	0	0	118	0	118	n	0.01	2	144	2	144	y	0	0	105	0	105	n	0.03	5	146	5	146	y	0.02	4	158	4	158	y	0.02	4	178	4	178	y	0.0132356	4.24264	up	ENSG00000171456.20
known_NIR_35057	chr21	45282459	45285678	-	45282459	45283383	5pMXE	ENST00000471540.5	known	0.01	1	96	1	96	n	0.02	2	126	2	126	y	0.01	1	69	1	69	n	0.03	3	89	3	89	y	0.04	3	69	3	69	y	0.03	4	115	4	115	y	0.0132356	4.24264	up	ENSG00000186866.17
known_NIR_37807	chr3	194623695	194628383	-	194623695;194625990	194625897;194628383	ES	ENST00000392432.6	known	0.02	1	41.5	1	38;45	n	0	0	52	0	53;51	n	0	0	38	0	38;38	n	0.04	2	50.5	2	59;42	y	0.06	4	68	4	75;61	y	0.04	2	45.5	2	58;33	y	0.0132356	4.24264	up	ENSG00000145014.18
known_NIR_38246	chr3	41239354	41239822	+	41239354	41239819	A3SS	ENST00000405570.6	known	0.03	11	363	11	363	y	0.05	19	399	19	399	y	0.03	8	267	8	267	y	0.07	26	363	26	363	y	0.07	24	327	24	327	y	0.09	29	295	29	295	y	0.0132356	4.24264	up	ENSG00000168036.18
known_NIR_40530	chr4	48831249;48832682	48832620;48842636	+	48831249;48833481	48833401;48842636	MXE	ENST00000512981.5	known	0.24	113	353	220;6	2;704	y	0.26	133	379.5	266;0	0;759	n	0.26	89	247.5	177;1	0;495	n	0.28	140	360.5	280;0	0;721	n	0.3	152.5	354	305;0	0;708	n	0.3	163	371.5	326;0	1;742	n	0.0132356	4.24264	up	ENSG00000109180.15
known_NIR_41645	chr5	140645725	140647256	-	140645678	140647256	A3SS	ENST00000252102.9	known	0.11	329	2554	329	2554	y	0.11	335	2704	335	2704	y	0.1	254	2285	254	2285	y	0.09	237	2504	237	2504	y	0.08	244	2628	244	2628	y	0.09	292	2795	292	2795	y	0.0132356	-4.24264	down	ENSG00000131495.9
known_NIR_41715	chr5	141629306	141629860	-	141629306	141629684	A5SS	ENST00000471968.1	known	0.01	4	279	4	279	y	0.01	4	299	4	299	y	0	0	232	0	232	n	0.02	6	337	6	337	y	0.03	8	269	8	269	y	0.03	10	282	10	282	y	0.0132356	4.24264	up	ENSG00000171720.10
known_NIR_43727	chr6	166330247	166342419	-	166330247	166331385	5pMXE	ENST00000488773.1	known	0.98	636	15	636	15	y	0.98	595	12	595	12	y	0.99	446	6	446	6	y	0.96	564	21	564	21	y	0.96	447	18	447	18	y	0.97	538	14	538	14	y	0.0132356	-4.24264	down	ENSG00000198818.10
novel_NIR_13978	chr12	124912180;124912864	124912409;124913321	-	124912180	124913321	cassetteExon	ENST00000538617.5	novel	0.47	1985.5	2283	2985;986	2283	y	0.47	2058	2311	3062;1054	2311	y	0.48	1694.5	1865	2493;896	1865	y	0.46	2055.5	2410	3051;1060	2410	y	0.45	2074.5	2581	3125;1024	2581	y	0.45	2208	2681	3201;1215	2681	y	0.0132356	-4.24264	down	ENSG00000150991.15
novel_NIR_5934	chr1	71065748	71066776	-	71065752	71066776	A3SS	ENST00000254821.10	novel	0.15	27	156	27	156	y	0.15	18	105	18	105	y	0.13	13	90	13	90	n	0.05	9	163	9	163	n	0.09	14	150	14	150	n	0.08	15	164	15	164	n	0.0132454	-5.09325	down	ENSG00000132485.14
known_NIR_21523	chr17	1728626	1730755	+	1728626;1730487	1730380;1730755	ES	ENST00000309182.9	known	0.07	6	81	6	98;64	y	0.08	7	85.5	7	105;66	y	0.08	5	55	5	64;46	y	0.03	3	116	3	135;97	y	0.03	2	72.5	2	90;55	y	0.05	4	78.5	4	93;64	y	0.0133217	-5.36656	down	ENSG00000167716.19
known_NIR_14368	chr13	95985337	95986333	-	95983864	95986333	A3SS	ENST00000376747.8	known	0.92	47	4	47	4	y	0.91	31	3	31	3	y	0.92	23	2	23	2	y	0.95	36	2	36	2	y	0.97	36	1	36	1	n	0.95	57	3	57	3	y	0.0133217	5.36656	up	ENSG00000102595.20
known_NIR_25010	chr17	82244831;82246433	82245976;82248875	-	82244831	82248875	cassetteExon	ENST00000314028.10	known	0.71	357.5	149	698;17	149	y	0.7	372.5	160	711;34	160	y	0.71	332	137	660;4	137	y	0.66	359.5	184	699;20	184	y	0.66	398	205	780;16	205	y	0.68	386	182	747;25	182	y	0.0133217	-5.36656	down	ENSG00000141551.14
known_NIR_43121	chr5	91311032	91313078	-	91311032;91312495	91312295;91313078	ES	ENST00000649969.1	known	0.21	2	7.5	2	5;10	y	0	0	4	0	8;0	n	0.29	2	5	2	10;0	n	0.67	6	3	6	6;0	n	0.53	4	3.5	4	6;1	n	0.74	7	2.5	7	3;2	y	0.0134264	4.51768	up	ENSG00000248323.7
known_NIR_51006	chr9	175784;177820	177723;178816	-	175784	178816	cassetteExon	ENST00000356521.8	known	0.18	9	40	4;14	40	y	0.16	7.5	38	0;15	38	n	0.29	8.5	21	4;13	21	y	0.37	20	34	6;34	34	y	0.46	13.5	16	4;23	16	y	0.48	18.5	20	10;27	20	y	0.013501	4.3007	up	ENSG00000172785.18
known_NIR_28621	chr19	47169923	47180146	+	47169923	47209159	A3SS	ENST00000413379.7	known	0.84	16	3	16	3	y	0.88	21	3	21	3	y	0.89	16	2	16	2	y	1	11	0	11	0	n	1	12	0	12	0	n	1	25	0	25	0	n	0.0135272	8.5105	up	ENSG00000142230.13
known_NIR_35865	chr22	37808163	37810027	+	37808163	37809949	A3SS	ENST00000323205.10	known	1	68	0	68	0	n	1	37	0	37	0	n	1	49	0	49	0	n	0.95	82	4	82	4	y	0.93	56	4	56	4	y	0.95	56	3	56	3	y	0.0135599	-8.5	down	ENSG00000100116.17
known_NIR_52961	chrX	73994961	74004270	+	73998844	74004270	5pMXE	ENST00000668488.1	known	0.48	11	12	11	12	y	0.45	9	11	9	11	y	0.33	9	18	9	18	y	0.13	4	27	4	27	y	0.12	2	14	2	14	y	0.24	8	25	8	25	y	0.0135813	-4.29104	down	ENSG00000225470.8
known_NIR_31623	chr2	240575610	240576568	+	240575610	240576535	A3SS	ENST00000451363.5	known	0.08	31	353	31	353	y	0.11	37	299	37	299	y	0.09	25	248	25	248	y	0.17	49	243	49	243	y	0.14	41	259	41	259	y	0.14	48	295	48	295	y	0.0136006	4.25	up	ENSG00000142327.13
known_NIR_10771	chr12	120224377	120226153	-	120224377	120226353	A5SS	ENST00000543331.1	known	0.1	1	9	1	9	n	0	0	5	0	5	n	0	0	6	0	6	n	0.4	6	9	6	9	y	0.44	4	5	4	5	n	0.25	2	6	2	6	n	0.0136439	4.94382	up	ENSG00000089159.17
known_NIR_8208	chr11	5664173;5665395	5665169;5665656	-	5664173	5665656	cassetteExon	ENST00000380027.5	known	0.65	24	13	0;48	13	n	0.64	24.5	14	2;47	14	y	0.69	13.5	6	0;27	6	n	0.88	14	2	0;28	2	n	1	24	0	0;48	0	n	0.88	21	3	3;39	3	y	0.0137791	6.07229	up	ENSG00000132256.20
novel_NIR_14250	chr12	132945797	132948155	-	132945797	132956243	A5SS	ENST00000536932.5	novel	0	0	23	0	23	n	0.06	1	16	1	16	n	0	0	18	0	18	n	0.18	2	9	2	9	y	0.29	6	15	6	15	y	0.19	6	26	6	26	y	0.0138435	4.94872	up	ENSG00000072609.18
known_NIR_17999	chr15	84622714	84623481	+	84622714	84623276	A3SS	ENST00000538076.5	known	0.6	3	2	3	2	n	0.46	6	7	6	7	y	0.5	2	2	2	2	n	0.17	1	5	1	5	n	-	-	-	-	-	-	0.17	2	10	2	10	y	0.0138563	-8.40673	down	ENSG00000176371.14
known_NIR_15397	chr14	34969307	34971942	-	34969307	34982424	A5SS	ENST00000555015.5	known	0.14	1	6	1	6	n	0.17	1	5	1	5	n	0.39	7	11	7	11	y	0.78	7	2	7	2	n	0.82	9	2	9	2	y	0.55	12	10	12	10	y	0.0138988	4.19278	up	ENSG00000258704.6
novel_NIR_21775	chr15	70851720	70851901	-	70851720	70853347	A5SS	ENST00000560052.1	novel	0.12	1	7	1	7	n	0	0	6	0	6	n	0	0	2	0	2	n	-	-	-	-	-	-	0.33	1	2	1	2	n	0.27	3	8	3	8	y	0.0139286	5.2	up	ENSG00000166173.11
novel_NIR_59759	chr7	43650712;43656153	43656105;43729429	-	43650712	43729429	cassetteExon	ENST00000446564.5	novel	0.32	36	77	0;72	77	n	0.36	59	103	4;114	103	y	0.34	31	60	0;62	60	n	0.39	40	62	0;80	62	n	0.4	45	68	0;90	68	n	0.42	54	75	0;108	75	n	0.0139818	4.3589	up	ENSG00000106603.20
known_NIR_37323	chr3	158571347	158592434	+	158571391	158592434	A5SS	ENST00000618075.4	known	0.79	38	10	38	10	y	0.69	34	15	34	15	y	0.69	18	8	18	8	y	0.59	51	36	51	36	y	0.49	17	18	17	18	y	0.53	17	15	17	15	y	0.0139999	-4.22116	down	ENSG00000178053.20
known_NIR_20517	chr16	75451839	75464232	-	75451839	75464468	A5SS	ENST00000567194.5	known	0.08	1	12	1	12	n	0.09	2	21	2	21	y	0.1	2	19	2	19	y	0.23	5	17	5	17	y	0.29	8	20	8	20	y	0.22	6	21	6	21	y	0.0141723	6.92977	up	ENSG00000261717.5
known_NIR_40533	chr4	48831253	48832620	+	48831433	48832620	A5SS	ENST00000507210.5	known	-	-	-	-	-	-	0.5	1	1	1	1	n	0.4	2	3	2	3	n	1	2	0	2	0	n	1	4	0	4	0	n	0.77	10	3	10	3	y	0.0142217	5.17133	up	ENSG00000109180.15
known_NIR_48561	chr8	127989291;128070361	128070160;128096518	+	127989291;128010444	127994883;128096518	MXE	ENST00000662410.1	known	0.36	17	30.5	16;18	33;28	y	0.49	19	20	18;20	34;6	y	0.4	14.5	21.5	9;20	24;19	y	0.66	36.5	18.5	26;47	21;16	y	0.65	26.5	14	22;31	17;11	y	0.59	21.5	15	20;23	20;10	y	0.0142786	4.89956	up	ENSG00000249859.12
known_NIR_38622	chr3	48918998;48927813	48927462;48961612	+	48918998;48945181	48922748;48961612	MXE	ENST00000474618.5	known	0.45	40	48	5;75	88;8	y	0.47	51.5	58	1;102	95;21	n	0.44	28	35	3;53	62;8	y	0.39	36	56.5	0;72	108;5	n	0.4	34.5	52	0;69	94;10	n	0.4	29.5	44	1;58	85;3	n	0.0142927	-6.01041	down	ENSG00000177479.20
novel_NIR_49460	chr4	168472809	168479286	-	168472809	168475996	A5SS&ES	ENST00000514748.5	novel	0.5	6	6	6	6	y	0.5	8	8	8	8	y	0.46	6	7	6	7	y	0.08	1	11	1	11	n	0.24	8	25	8	25	y	0.17	2	10	2	10	y	0.0142991	-6.70963	down	ENSG00000181381.15
known_NIR_52916	chrX	73944662	73998768	+	73944662	73994840	A3SS&ES	ENST00000640437.1	known	0.07	2	27	2	27	y	0	0	30	0	30	n	0.05	1	19	1	19	n	0.15	2	11	2	11	y	0.18	5	23	5	23	y	0.13	6	41	6	41	y	0.0143178	4.46442	up	ENSG00000225470.8
known_NIR_49355	chr8	23434681	23435392	-	23434478	23435392	A3SS	ENST00000518471.5	known	0	0	16	0	16	n	0	0	17	0	17	n	0	0	10	0	10	n	0.22	2	7	2	7	n	0.33	2	4	2	4	n	0.32	6	13	6	13	y	0.0143502	8.25767	up	ENSG00000197217.13
known_NIR_18918	chr16	28836122	28836728	+	28836485	28836728	A5SS	ENST00000562583.5	known	0.77	74	22	74	22	y	0.73	53	20	53	20	y	0.75	68	23	68	23	y	0.9	115	13	115	13	y	0.83	78	16	78	16	y	0.86	77	13	77	13	y	0.0146067	4.85714	up	ENSG00000168488.19
novel_NIR_26252	chr17	15503232	15506798	-	15503232	15545785	A5SS	ENST00000225576.7	novel	0	0	7	0	7	n	0	0	8	0	8	n	0	0	12	0	12	n	0.26	5	14	5	14	y	0.4	2	3	2	3	y	0.33	2	4	2	4	y	0.0146693	8.16538	up	ENSG00000175106.17
known_NIR_34402	chr20	56392713	56395521	+	56392538	56395521	A5SS	ENST00000498689.5	known	0.38	21	35	21	35	y	0.32	21	45	21	45	y	0.29	16	39	16	39	y	0.44	35	45	35	45	y	0.48	25	27	25	27	y	0.5	33	33	33	33	y	0.0147114	4.50762	up	ENSG00000101138.12
novel_NIR_33650	chr19	4179286	4180580	-	4179286	4182474	A5SS	ENST00000599365.5	novel	0.83	15	3	15	3	y	0.65	13	7	13	7	y	0.65	22	12	22	12	y	0.42	14	19	14	19	y	0.38	12	20	12	20	y	0.31	11	24	11	24	y	0.0147121	-4.99496	down	ENSG00000077463.15
known_NIR_42686	chr5	56911111	56913011	+	56909743	56913011	A5SS	ENST00000418299.5	known	0.14	7	44	7	44	y	0.17	8	40	8	40	y	0.22	5	18	5	18	y	0.03	1	31	1	31	n	0.08	4	45	4	45	y	0.04	2	47	2	47	y	0.0147154	-4.54187	down	ENSG00000155542.12
known_NIR_41259	chr5	132218644	132227790	-	132218644	132227086	5pMXE	ENST00000428369.6	known	0.25	27	81	27	81	y	0.29	29	71	29	71	y	0.32	23	49	23	49	y	0.41	37	54	37	54	y	0.41	41	60	41	60	y	0.37	36	62	36	62	y	0.0147185	4.5329	up	ENSG00000072682.20
known_NIR_8296	chr11	57815500;57816001	57815915;57816297	+	57815500	57816297	cassetteExon	ENST00000673781.1	known	0.08	16.5	189	13;20	189	y	0.1	24.5	211	23;26	211	y	0.09	15	156	17;13	156	y	0.06	12.5	209	13;12	209	y	0.04	9	211	11;7	211	y	0.06	13	207	13;13	207	y	0.0147784	-4.15761	down	ENSG00000288534.1
known_NIR_12979	chr12	57719182;57720263	57720099;57720406	+	57719182	57720406	cassetteExon	ENST00000552285.5	known	0.35	544.5	998	661;428	998	y	0.37	574.5	983	704;445	983	y	0.35	444	839	516;372	839	y	0.31	454	1000	521;387	1000	y	0.33	540	1073	604;476	1073	y	0.32	532.5	1108	617;448	1108	y	0.0147784	-4.15761	down	ENSG00000135506.16
known_NIR_2377	chr1	213167973	213230497	+	213167973;213176492	213176400;213230497	ES	ENST00000543354.5	known	0	0	3.5	0	7;0	n	0	0	8.5	0	9;8	n	-	-	-	-	-	-	0.46	3	3.5	3	3;4	y	0.37	5	8.5	5	9;8	y	0.3	3	7	3	9;5	y	0.0147805	8.13392	up	ENSG00000136643.12
known_NIR_18419	chr16	1678356	1683509	+	1678356	1691843	A3SS	ENST00000569256.5	known	1	7	0	7	0	n	1	7	0	7	0	n	1	14	0	14	0	n	0.75	9	3	9	3	y	0.67	4	2	4	2	n	0.78	7	2	7	2	n	0.0148202	-8.12277	down	ENSG00000206053.13
novel_NIR_56891	chr7	100149565	100152716	+	100149579	100152716	A5SS	ENST00000473459.5	novel	0.01	1	82	1	82	n	0	0	75	0	75	n	0	0	54	0	54	n	0.11	10	82	10	82	n	0.11	6	47	6	47	n	0.16	7	36	7	36	y	0.0149211	7.2563	up	ENSG00000188186.10
novel_NIR_250	chr1	109282736	109283028	-	109282731	109283028	A3SS	ENST00000409267.5	novel	0	0	8	0	8	n	0	0	2	0	2	n	0	0	6	0	6	n	0.67	4	2	4	2	y	1	2	0	2	0	y	1	2	0	2	0	y	0.0149345	8.09091	up	ENSG00000134222.16
novel_NIR_19014	chr14	34928202	34934017	-	34921713	34934017	A3SS	ENST00000555015.5	novel	1	6	0	6	0	y	0.67	4	2	4	2	y	1	1	0	1	0	n	0	0	1	0	1	n	-	-	-	-	-	-	0	0	1	0	1	n	0.0149345	-8.09091	down	ENSG00000258704.6
novel_NIR_31094	chr18	55893442	55917205	+	55893442	56017728	A3SS	ENST00000589440.1	novel	1	12	0	12	0	y	-	-	-	-	-	-	1	3	0	3	0	n	0	0	3	0	3	n	0	0	5	0	5	n	0.33	1	2	1	2	n	0.0149345	-8.09091	down	ENSG00000267327.2
novel_NIR_31128	chr18	57642052	57734026	+	57642052	57667242	3pMXE	ENST00000591854.5	novel	0.33	3	6	3	6	y	0	0	6	0	6	n	0	0	2	0	2	n	-	-	-	-	-	-	1	2	0	2	0	y	1	1	0	1	0	n	0.0149345	8.09091	up	ENSG00000267040.6
novel_NIR_54453	chr6	142528383;142624608	142624475;142637713	-	142528383;142544993	142544807;142637713	MXE	ENST00000447311.1	novel	-	-	-	-	-	-	1	1	0	0;2	0;0	n	1	4.5	0	2;7	0;0	y	0	0	2.5	0;0	1;4	n	0	0	5	0;0	1;9	n	0.33	1	2	2;0	0;4	n	0.0149345	-8.09091	down	ENSG00000236366.3
novel_NIR_54454	chr6	142528383;142624608	142624475;142637713	-	142528383;142596536	142544807;142637713	MXE	ENST00000635073.1	novel	-	-	-	-	-	-	1	1	0	0;2	0;0	n	1	4.5	0	2;7	0;0	y	0	0	3.5	0;0	1;6	n	0	0	0.5	0;0	1;0	n	0.33	1	2	2;0	0;4	n	0.0149345	-8.09091	down	ENSG00000236366.3
novel_NIR_65110	chr9	121855561	121860337	-	121822879	121860337	A3SS	ENST00000321582.11	novel	0	0	2	0	2	n	0	0	2	0	2	n	0.33	1	2	1	2	n	1	2	0	2	0	y	-	-	-	-	-	-	1	2	0	2	0	y	0.0149345	8.09091	up	ENSG00000175764.16
novel_NIR_66448	chr9	5361888	5431274	-	5361888	5381863	A5SS&ES	ENST00000482696.5	novel	0	0	3	0	3	n	0	0	3	0	3	n	0.33	1	2	1	2	n	1	1	0	1	0	n	1	2	0	2	0	y	-	-	-	-	-	-	0.0149345	8.09091	up	ENSG00000107020.10
novel_NIR_67273	chrX	129982762	129982982	+	129982762	130005188	A3SS	ENST00000218147.11	novel	0	0	2	0	2	n	0	0	3	0	3	n	0.33	2	4	2	4	y	-	-	-	-	-	-	1	5	0	5	0	y	1	4	0	4	0	y	0.0149345	8.09091	up	ENSG00000085185.16
novel_NIR_68590	chrX	52956755	52957602	-	52956755	52957088	5pMXE	ENST00000619586.5	novel	0.33	1	2	1	2	n	0	0	2	0	2	n	0	0	1	0	1	n	1	2	0	2	0	y	-	-	-	-	-	-	1	4	0	4	0	y	0.0149345	8.09091	up	ENSG00000268350.8
known_NIR_24181	chr17	76089320;76090397	76090329;76094414	-	76089320;76091235	76091143;76094414	MXE	ENST00000589210.6	known	0.88	3.5	0.5	5;2	0;1	n	0.79	7.5	2	12;3	0;4	n	0.87	6.5	1	8;5	0;2	n	0.6	9	6	14;4	0;12	n	0.41	3.5	5	7;0	8;2	n	0.55	5.5	4.5	8;3	6;3	y	0.0149675	-5.1366	down	ENSG00000182473.22
novel_NIR_61184	chr7	92832929	92833091	-	92774831	92833091	A3SS	ENST00000265734.8	novel	0.44	8	10	8	10	y	0.43	3	4	3	4	y	0.25	3	9	3	9	y	0	0	14	0	14	n	0.12	2	15	2	15	n	0	0	15	0	15	n	0.0150185	-4.53143	down	ENSG00000105810.10
novel_NIR_60753	chr7	75352021	75353569	-	75352021;75353402	75353290;75353569	ES	ENST00000425039.3	novel	0	0	6	0	0;12	n	0	0	3	0	0;6	n	0	0	0.5	0	0;1	n	0.57	4	3	4	1;5	y	0.4	3	4.5	3	0;9	y	0.4	3	4.5	3	0;9	y	0.015051	8.05882	up	ENSG00000278416.1
known_NIR_16235	chr14	88024669;88044848	88044686;88079104	+	88024669	88079104	cassetteExon	ENST00000658103.1	known	0.48	5.5	6	0;11	6	n	0.65	5.5	3	6;5	3	y	0.43	4.5	6	2;7	6	y	1	3	0	6;0	0	n	1	3.5	0	6;1	0	n	0.78	7	2	5;9	2	y	0.0150656	4.10563	up	ENSG00000258867.6
known_NIR_17289	chr15	60393440	60397943	-	60396427	60397943	3pMXE	ENST00000560495.1	known	0.25	2	6	2	6	n	0	0	8	0	8	n	0	0	3	0	3	n	0.5	2	2	2	2	n	0.64	7	4	7	4	y	0.55	6	5	6	5	y	0.0150977	5.1693	up	ENSG00000182718.18
known_NIR_27060	chr19	19133210	19138426	-	19133210;19134887	19134784;19138426	ES	ENST00000450333.6	known	0.09	7	72	7	127;17	y	0.08	10	122.5	10	203;42	y	0.12	10	73.5	10	121;26	y	0	0	94.5	0	158;31	n	0	0	117.5	0	207;28	n	0	0	82	0	139;25	n	0.0151084	-8.04315	down	ENSG00000064545.15
known_NIR_15310	chr14	24440926	24442346	-	24440926;24441795	24441674;24442346	ES	ENST00000555365.5	known	0.19	23	100	23	179;21	y	0.16	23	124.5	23	228;21	y	0.15	14	82	14	146;18	y	0.24	36	111	36	216;6	y	0.22	35	125.5	35	211;40	y	0.24	41	131.5	41	249;14	y	0.015214	4.85071	up	ENSG00000100445.18
known_NIR_35278	chr22	20052584	20061530	+	20052584	20055943	3pMXE	ENST00000471707.5	known	0.12	6	43	6	43	y	0.1	4	36	4	36	y	0.12	5	35	5	35	y	0.03	2	61	2	61	y	0.07	4	51	4	51	y	0.04	2	47	2	47	y	0.015214	-4.85071	down	ENSG00000183597.16
known_NIR_50333	chr9	127404991	127407112	+	127404991;127405565	127405420;127407112	ES	ENST00000610552.4	known	0.08	5	59	5	56;62	y	0.19	13	56.5	13	38;75	y	0.11	4	32.5	4	19;46	y	0.39	28	44.5	28	23;66	y	0.27	19	51.5	19	39;64	y	0.31	18	40	18	33;47	y	0.0152423	4.08112	up	ENSG00000136856.18
known_NIR_6498	chr10	99732560	99736246	+	99732409	99736246	A5SS	ENST00000370476.10	known	0.03	4	146	4	146	y	0.03	6	205	6	205	y	0.03	3	93	3	93	y	0	0	147	0	147	n	0.01	1	121	1	121	n	0	0	136	0	136	n	0.0152681	-8	down	ENSG00000119929.13
known_NIR_23816	chr17	74864949	74865719	-	74864931	74865719	A3SS	ENST00000293195.10	known	0.03	3	88	3	88	y	0.03	4	111	4	111	y	0.03	2	73	2	73	y	0	0	108	0	108	n	0.01	1	125	1	125	n	0	0	75	0	75	n	0.0152681	-8	down	ENSG00000161513.12
known_NIR_30768	chr2	200329480	200389223	+	200329480	200372109	3pMXE	ENST00000471533.5	known	0.97	61	2	61	2	y	0.97	56	2	56	2	y	0.98	44	1	44	1	n	1	61	0	61	0	n	1	76	0	76	0	n	1	57	0	57	0	n	0.0152681	8	up	ENSG00000196141.14
known_NIR_34585	chr20	63196734	63213864	-	63196734;63203807	63202287;63213864	ES	ENST00000370339.8	known	0.03	5	138	5	211;65	y	0.03	6	212	6	321;103	y	0.02	3	143	3	222;64	y	0	0	165	0	247;83	n	0	0	156	0	225;87	n	0	0	139.5	0	217;62	n	0.0152681	-8	down	ENSG00000149658.18
known_NIR_41850	chr5	150402625	150404680	-	150402625;150403312	150403121;150404680	ES	ENST00000009530.12	known	0.99	369	5	369	7;3	y	0.99	326	2.5	326	2;3	y	0.98	236	4.5	236	5;4	y	0.96	308	12	308	15;9	y	0.96	287	12	287	8;16	y	0.96	339	14	339	20;8	y	0.0152681	-8	down	ENSG00000019582.16
novel_NIR_50301	chr4	55871958	55872755	+	55871958	55877917	A3SS	ENST00000381295.7	novel	0.27	3	8	3	8	y	0.24	6	19	6	19	n	0.21	3	11	3	11	y	0.1	2	19	2	19	n	0	0	21	0	21	n	0.09	3	30	3	30	n	0.0153505	-4.87905	down	ENSG00000090989.18
known_NIR_27061	chr19	19133210	19138426	-	19134887	19138426	A3SS&ES	ENST00000590216.6	known	0.29	7	17	7	17	y	0.19	10	42	10	42	y	0.28	10	26	10	26	y	0	0	31	0	31	n	0	0	28	0	28	n	0	0	25	0	25	n	0.015392	-7.96696	down	ENSG00000064545.15
known_NIR_24168	chr17	75957566;75973785	75973625;75978534	-	75957566;75960375	75960215;75978534	MXE	ENST00000293217.10	known	0.14	1.5	9	0;3	9;9	n	0.16	2	10.5	4;0	13;8	n	0.14	1.5	9.5	0;3	12;7	n	0.55	5.5	4.5	10;1	7;2	n	0.4	7	10.5	3;11	5;16	y	0.47	7	8	3;11	13;3	y	0.0154093	7.4508	up	ENSG00000161533.12
known_NIR_9218	chr11	67507689	67507860	-	67507689	67508001	A5SS	ENST00000301488.8	known	0.1	34	296	34	296	y	0.1	36	318	36	318	y	0.12	37	262	37	262	y	0.17	59	280	59	280	y	0.14	50	310	50	310	y	0.17	64	313	64	313	y	0.0154329	4.4376	up	ENSG00000167797.8
known_NIR_6337	chr10	88948953	88990939	-	88948953	88991022	A5SS	ENST00000458159.5	known	1	4	0	4	0	n	1	2	0	2	0	n	1	11	0	11	0	n	0.83	10	2	10	2	y	0.75	12	4	12	4	y	0.82	9	2	9	2	y	0.0154669	-7.94719	down	ENSG00000107796.13
known_NIR_48459	chr8	127860093	127890589	+	127816884	127890589	A5SS	ENST00000654105.1	known	0.33	7	14	7	14	y	0.33	4	8	4	8	y	0.27	3	8	3	8	y	0	0	4	0	4	n	0.13	2	13	2	13	y	0.11	1	8	1	8	n	0.0155064	-5.10063	down	ENSG00000249859.12
known_NIR_36225	chr22	50248292;50248859	50248662;50249103	-	50248292;50248472	50248366;50249103	MXE	ENST00000454936.5	known	0.11	5	39.5	0;10	71;8	n	0.13	8	53	0;16	102;4	n	0.1	5	45	3;7	88;2	y	0.04	1.5	37.5	0;3	71;4	n	0	0	60	0;0	114;6	n	0.05	3	52	0;6	104;0	n	0.0155153	-4.72456	down	ENSG00000100429.18
known_NIR_44602	chr6	42126843	42128672	-	42110291	42128672	A3SS	ENST00000341865.9	known	0.99	66	1	66	1	n	0.95	58	3	58	3	y	0.94	44	3	44	3	y	0.86	31	5	31	5	y	0.89	58	7	58	7	y	0.88	44	6	44	6	y	0.0155153	-4.72456	down	ENSG00000188112.9
novel_NIR_36261	chr2	113598506	113598607	+	113598466	113598607	A5SS	ENST00000453662.6	novel	0.31	13	29	13	29	y	0.43	19	25	19	25	y	0.26	10	29	10	29	y	0.03	1	38	1	38	n	0.03	1	28	1	28	n	0.12	6	46	6	46	n	0.0155279	-4.65729	down	ENSG00000146556.14
known_NIR_18252	chr16	11556735	11587151	-	11556735	11586886	5pMXE	ENST00000622633.5	known	0.18	2	9	2	9	y	0.28	5	13	5	13	y	0.17	1	5	1	5	n	0	0	12	0	12	n	0	0	9	0	9	n	0.07	2	26	2	26	y	0.0156098	-4.42719	down	ENSG00000189067.14
known_NIR_35913	chr22	38098482	38108255	-	38098482;38107913	38107852;38108255	ES	ENST00000381669.8	known	0.07	9	112	9	119;105	y	0.12	11	77.5	11	91;64	y	0.09	7	68.5	7	71;66	y	0.04	4	93	4	95;91	y	0	0	86.5	0	97;76	n	0	0	78.5	0	82;75	n	0.0156177	-4.05674	down	ENSG00000128298.18
known_NIR_39559	chr4	102826636	102868715	-	102826636	102827592	5pMXE	ENST00000394801.8	known	0.03	9	306	9	306	y	0.06	18	261	18	261	y	0.05	9	185	9	185	y	0.1	27	252	27	252	y	0.1	28	261	28	261	y	0.08	24	284	24	284	y	0.0156578	4.22116	up	ENSG00000109332.20
novel_NIR_32624	chr19	2328775	2338752	+	2337625	2338752	A5SS&ES	ENST00000621615.1	novel	0.05	1	21	1	21	n	0.04	1	27	1	27	n	0	0	14	0	14	n	0.15	5	28	5	28	y	0.1	4	35	4	35	n	0.17	4	19	4	19	y	0.0156734	4.26028	up	ENSG00000273734.1
known_NIR_35287	chr22	20052584;20056013	20055943;20063338	+	20052584;20053551	20053437;20063338	MXE	ENST00000447208.6	known	0.58	22.5	16	43;2	32;0	n	0.48	19.5	21	36;3	42;0	n	0.55	18	15	35;1	30;0	n	0.75	33	11	61;5	22;0	n	0.73	27	10	51;3	18;2	y	0.72	26	10	47;5	20;0	n	0.0156992	6.36213	up	ENSG00000183597.16
novel_NIR_50753	chr4	8458401	8463985	+	8454813	8463985	A5SS	ENST00000513449.6	novel	0.11	4	34	4	34	n	0.1	3	28	3	28	n	0.15	4	23	4	23	y	0	0	35	0	35	n	0	0	20	0	20	n	0	0	37	0	37	n	0.0158202	-7.85584	down	ENSG00000155275.19
known_NIR_20599	chr16	80976179;80997429	80997314;81006734	-	80976179;80981877	80981806;81006734	MXE	ENST00000569187.5	known	0.45	289.5	354	22;557	703;5	y	0.48	308	336.5	25;591	659;14	y	0.46	201	237.5	21;381	471;4	y	0.52	307.5	287	9;606	564;10	y	0.51	328.5	320	22;635	622;18	y	0.5	340.5	343	18;663	680;6	y	0.0159022	4.42719	up	ENSG00000103121.9
known_NIR_49573	chr8	42535335;42536471	42536355;42540915	-	42535335	42540915	cassetteExon	ENST00000523340.1	known	0.25	3	9	5;1	9	n	0.2	2	8	3;1	8	n	0	0	8	0;0	8	n	0.52	5.5	5	6;5	5	y	0.67	4	2	0;8	2	n	0.47	7	8	11;3	8	y	0.0159313	4.15027	up	ENSG00000168575.10
novel_NIR_12807	chr12	10213219	10214669	+	10213219	10220440	A3SS	ENST00000545047.5	novel	1	8	0	8	0	y	1	2	0	2	0	y	-	-	-	-	-	-	0.5	1	1	1	1	n	0.5	2	2	2	2	y	0.67	4	2	4	2	y	0.015948	-7.82353	down	ENSG00000139112.11
novel_NIR_20425	chr15	24968082	24974642	+	24968082	24974288	A3SS&ES	ENST00000577565.1	novel	0	0	5	0	5	n	0	0	2	0	2	n	0	0	1	0	1	n	0.33	2	4	2	4	y	0.5	2	2	2	2	y	0.5	3	3	3	3	y	0.015948	7.82353	up	ENSG00000128739.23
known_NIR_25062	chr17	82419883;82428127	82428030;82428558	+	82419883;82424503	82424394;82428558	MXE	ENST00000337014.10	known	0.1	3	26	4;2	25;27	y	0.12	2	15	0;4	18;12	n	0.07	2.5	32.5	1;4	42;23	n	0.04	1	24	0;2	22;26	n	0	0	24	0;0	17;31	n	0.02	0.5	21	0;1	24;18	n	0.0160362	-4.13092	down	ENSG00000169660.17
known_NIR_20252	chr16	68249446;68253517	68253422;68254919	+	68249446	68254919	cassetteExon	ENST00000565744.5	known	0.02	1	54	2;0	54	n	0.06	3.5	54	5;2	54	y	0.04	1.5	37	2;1	37	n	0.12	8	61	8;8	61	y	0.09	8	82	7;9	82	y	0.14	7	43	9;5	43	y	0.0160362	4.13092	up	ENSG00000103066.13
novel_NIR_743	chr1	1402425	1405809	-	1402601	1405809	A3SS	ENST00000492508.1	novel	0.36	38	67	38	67	y	0.32	31	67	31	67	y	0.25	26	76	26	76	y	0.1	9	82	9	82	n	0.16	24	125	24	125	y	0.15	18	99	18	99	y	0.0160439	-4.66974	down	ENSG00000242485.6
novel_NIR_46060	chr3	165511651	165513840	+	165511651	165521760	A3SS	ENST00000665369.1	novel	0.36	8	14	8	14	y	0.36	10	18	10	18	y	0.31	5	11	5	11	y	0.73	22	8	22	8	y	0.58	15	11	15	11	y	0.6	35	23	35	23	y	0.0161211	5.87975	up	ENSG00000244128.7
known_NIR_34886	chr21	39345274;39347292	39347247;39348292	-	39345274;39345958	39345830;39348292	MXE	ENST00000288344.14	known	0.15	13.5	76	21;6	130;22	y	0.13	11.5	74.5	21;2	119;30	y	0.17	10.5	51.5	20;1	75;28	n	0.1	8.5	78.5	16;1	127;30	n	0.05	4	73	7;1	114;32	n	0.06	6	93	8;4	151;35	y	0.0161801	-4.17786	down	ENSG00000205581.11
known_NIR_7214	chr11	14879207;14880359	14880136;14885776	-	14879207	14885776	cassetteExon	ENST00000525015.1	known	0.56	22	17	29;15	17	y	0.43	10	13	17;3	13	y	0.46	6	7	12;0	7	n	0.71	12.5	5	24;1	5	n	0.7	9.5	4	11;8	4	y	0.75	12	4	16;8	4	y	0.0163637	5.61304	up	ENSG00000186104.11
known_NIR_4608	chr1	6825210;6886346	6886240;6887654	+	6825210	6887654	cassetteExon	ENST00000557126.5	known	0.93	27.5	2	4;51	2	y	0.9	26.5	3	0;53	3	n	0.88	15	2	0;30	2	n	0.85	17	3	0;34	3	n	0.81	22	5	0;44	5	n	0.82	28	6	0;56	6	n	0.0163723	-4.06586	down	ENSG00000171735.19
known_NIR_45514	chr7	106775200;106776022	106775959;106780650	+	106775200;106777732	106777542;106780650	MXE	ENST00000659396.1	known	0.36	21.5	39	30;13	34;44	y	0.28	15.5	39	19;12	39;39	y	0.34	13.5	26	19;8	24;28	y	0.44	27.5	35.5	43;12	36;35	y	0.43	28.5	37.5	39;18	30;45	y	0.5	29	29	40;18	33;25	y	0.0163985	4.00132	up	ENSG00000228742.11
known_NIR_33493	chr20	33707969	33714674	-	33707969;33710753	33710555;33714674	ES	ENST00000409299.8	known	0.21	7	27	7	27;27	y	0.25	6	18	6	21;15	y	0.18	6	28	6	39;17	y	0.14	3	18	3	20;16	y	0.08	2	22	2	34;10	y	0.08	2	24	2	32;16	y	0.0164154	-3.9794	down	ENSG00000101417.12
known_NIR_40193	chr4	1939778	1941335	+	1939778	1942339	A3SS	ENST00000398261.6	known	0.07	2	27	2	27	y	0	0	28	0	28	n	0	0	14	0	14	n	0.17	6	30	6	30	y	0.11	2	17	2	17	y	0.19	4	17	4	17	y	0.0164274	3.98015	up	ENSG00000109685.19
novel_NIR_44185	chr22	44702608	44725244	+	44714671	44725244	A5SS&ES	ENST00000617066.4	novel	0.21	8	31	8	31	y	0.16	10	54	10	54	y	0.13	6	40	6	40	n	0	0	27	0	27	n	0.02	1	40	1	40	n	0.02	1	60	1	60	n	0.0164464	-6.31859	down	ENSG00000186654.21
known_NIR_29210	chr19	52721267	52728730	-	52715913	52728730	A3SS	ENST00000453741.6	known	0.46	6	7	6	7	y	0.57	4	3	4	3	n	0.67	6	3	6	3	n	0.33	2	4	2	4	n	0.22	2	7	2	7	n	0.2	3	12	3	12	y	0.0164617	-4.3452	down	ENSG00000213020.10
known_NIR_35784	chr22	36233455	36234236	-	36233455	36239136	A5SS	ENST00000529194.5	known	1	11	0	11	0	n	1	26	0	26	0	n	1	23	0	23	0	n	0.85	11	2	11	2	y	0.87	20	3	20	3	y	0.8	12	3	12	3	y	0.0165091	-7.68615	down	ENSG00000128335.14
known_NIR_10426	chr12	110496203	110499457	-	110496203;110498859	110498820;110499457	ES	ENST00000552130.6	known	0.2	10	41	10	82;0	n	0.08	4	44.5	4	85;4	y	0.17	6	28.5	6	57;0	n	0.28	14	35.5	14	67;4	y	0.39	14	22	14	44;0	n	0.38	23	37.5	23	73;2	y	0.0165113	3.9736	up	ENSG00000111237.19
novel_NIR_31471	chr19	1014317	1014399	-	1014317	1020772	A5SS	ENST00000586704.5	novel	0.67	8	4	8	4	y	1	4	0	4	0	y	0.8	4	1	4	1	y	-	-	-	-	-	-	0	0	2	0	2	n	0.19	3	13	3	13	y	0.0165268	-5.39342	down	ENSG00000182087.14
known_NIR_39628	chr4	105700014;105703023	105702886;105703648	-	105700014	105703648	cassetteExon	ENST00000340139.10	known	0.04	1	24	1;1	24	n	0.04	2	50	0;4	50	n	0.03	1	32	0;2	32	n	0.14	7	44	4;10	44	y	0.16	7	36	7;7	36	y	0.11	6.5	53	3;10	53	y	0.0165281	6.7082	up	ENSG00000138785.15
known_NIR_21524	chr17	1728626	1730755	+	1730487	1730755	A5SS&ES	ENST00000455636.5	known	0.09	6	64	6	64	y	0.1	7	66	7	66	y	0.1	5	46	5	46	y	0.03	3	97	3	97	y	0.04	2	55	2	55	y	0.06	4	64	4	64	y	0.0165506	-5.65685	down	ENSG00000167716.19
known_NIR_19606	chr16	53500329	53503147	-	53500329	53502700	A5SS	ENST00000568596.5	known	0.94	16	1	16	1	n	0.88	14	2	14	2	y	1	3	0	3	0	n	0.7	7	3	7	3	y	0.62	5	3	5	3	n	0.78	7	2	7	2	n	0.0165665	-4.15692	down	ENSG00000166971.17
known_NIR_32721	chr2	74421816;74422375	74422120;74422870	+	74421816	74422870	cassetteExon	ENST00000461531.5	known	0.41	28	40	0;56	40	n	0.49	38	40	1;75	40	n	0.43	26	34	0;52	34	n	0.56	46.5	37	0;93	37	n	0.68	59	28	1;117	28	n	0.64	47	26	6;88	26	y	0.0166098	4.29478	up	ENSG00000005448.17
known_NIR_41404	chr5	134573762	134578497	+	134573762;134576896	134576768;134578497	ES	ENST00000680418.1	known	0.21	15	55	15	82;28	y	0.23	22	72	22	99;45	y	0.2	13	52.5	13	83;22	y	0.18	17	76.5	17	111;42	y	0.15	13	76.5	13	104;49	y	0.15	12	70	12	89;51	y	0.0166297	-4	down	ENSG00000043143.22
known_NIR_35275	chr22	20052584	20055943	+	20052584	20053437	3pMXE	ENST00000479679.5	known	0.57	43	32	43	32	y	0.46	36	42	36	42	y	0.54	35	30	35	30	y	0.73	61	22	61	22	y	0.74	51	18	51	18	y	0.7	47	20	47	20	y	0.0166545	5.72078	up	ENSG00000183597.16
novel_NIR_14911	chr12	42355222	42384940	+	42355222	42387456	A3SS	ENST00000551723.5	novel	0.33	1	2	1	2	n	0.29	2	5	2	5	y	0	0	3	0	3	n	1	8	0	8	0	y	-	-	-	-	-	-	1	1	0	1	0	n	0.0167472	7.62993	up	ENSG00000134283.18
novel_NIR_36440	chr2	131500350	131500506	+	131500346	131500506	A5SS	ENST00000415574.6	novel	0.29	2	5	2	5	y	0.27	3	8	3	8	y	-	-	-	-	-	-	0	0	4	0	4	n	0	0	3	0	3	n	0.11	1	8	1	8	n	0.0167474	-6.40252	down	ENSG00000152117.17
known_NIR_11811	chr12	48655060	48658632	-	48655060	48660468	A5SS	ENST00000548147.5	known	0.1	2	18	2	18	y	0	0	13	0	13	n	0.11	2	17	2	17	y	0.2	4	16	4	16	y	0.31	4	9	4	9	y	0.32	6	13	6	13	y	0.0168136	3.96914	up	ENSG00000139620.13
known_NIR_25036	chr17	8228892	8229302	-	8228892	8229142	A5SS	ENST00000578441.5	known	0	0	28	0	28	n	0	0	28	0	28	n	0.02	1	45	1	45	n	0.05	2	39	2	39	y	0.04	1	27	1	27	n	0.04	1	23	1	23	n	0.0168559	4.91935	up	ENSG00000178971.16
known_NIR_25037	chr17	8228892	8229302	-	8228892;8229206	8229142;8229302	ES	ENST00000651323.1	known	0	0	26	0	28;24	n	0	0	27.5	0	28;27	n	0.02	1	47	1	45;49	n	0.05	2	40.5	2	39;42	y	0.04	1	26	1	27;25	n	0.04	1	25.5	1	23;28	n	0.0168559	4.91935	up	ENSG00000178971.16
novel_NIR_52087	chr5	16814681	16818009	-	16815463	16818009	A3SS	ENST00000507288.1	novel	0	0	3	0	3	n	0	0	14	0	14	n	0.4	4	6	4	6	y	1	4	0	4	0	y	0.8	4	1	4	1	y	0.8	8	2	8	2	y	0.0168559	4.91935	up	ENSG00000145555.15
known_NIR_16845	chr15	42228820;42231915	42231844;42233213	-	42228820;42231260	42231192;42233213	MXE	ENST00000389834.9	known	0.28	18	46.5	18;18	46;47	y	0.28	27.5	71.5	29;26	76;67	y	0.31	13	29	7;19	22;36	y	0.14	14	83	16;12	83;83	y	0.15	10.5	61.5	9;12	63;60	y	0.21	13.5	50.5	18;9	50;51	y	0.0169124	-5.13098	down	ENSG00000103978.16
novel_NIR_1350	chr1	15426018	15428593	+	15426018;15427284	15427150;15428593	ES	ENST00000375980.9	novel	0.06	63	967	63	906;1028	n	0	0	1038	0	996;1080	n	0	0	846.5	0	819;874	n	0.11	115	938.5	115	886;991	n	0.15	173	961	173	877;1045	y	0.11	113	930	113	901;959	n	0.0169972	4.29893	up	ENSG00000142634.13
known_NIR_11549	chr12	29633336	29640560	-	29633336	29751666	A5SS	ENST00000539277.6	known	1	10	0	10	0	n	1	6	0	6	0	n	1	3	0	3	0	n	0.67	2	1	2	1	n	0.64	7	4	7	4	y	0.5	4	4	4	4	n	0.0169988	-7.57179	down	ENSG00000133687.16
known_NIR_48508	chr8	127989291	128009590	+	127989291	127994883	3pMXE	ENST00000670795.1	known	0.82	148	33	148	33	y	0.85	193	34	193	34	y	0.86	147	24	147	24	y	0.91	206	21	206	21	y	0.9	156	17	156	17	y	0.92	229	20	229	20	y	0.0170057	5	up	ENSG00000249859.12
known_NIR_39780	chr4	127938838;127942158	127942045;127943752	-	127938838;127939997	127939853;127943752	MXE	ENST00000641186.1	known	0.45	7.5	9	3;12	16;2	y	0.53	8	7	2;14	14;0	n	0.43	1.5	2	3;0	4;0	n	0.35	7	13	1;13	26;0	n	0.24	3.5	11	0;7	20;2	n	0.3	3	7	0;6	14;0	n	0.0171437	-3.93083	down	ENSG00000164073.11
novel_NIR_8942	chr10	94850058	94905749	+	94850058	94852733	3pMXE	ENST00000464755.1	novel	0.86	6	1	6	1	y	1	3	0	3	0	y	-	-	-	-	-	-	-	-	-	-	-	-	0.08	1	11	1	11	n	0	0	1	0	1	n	0.0171714	-11.0391	down	ENSG00000276490.1
novel_NIR_15213	chr12	49324037	49324212	+	49324037	49324231	A3SS	ENST00000548311.5	novel	0.4	129	197	129	197	y	0.43	143	187	143	187	y	0.44	124	158	124	158	y	0.35	96	175	96	175	y	0.38	114	186	114	186	y	0.34	115	220	115	220	y	0.017214	-3.92232	down	ENSG00000135451.13
known_NIR_41682	chr5	140690773	140690855	-	140687933	140690855	A3SS	ENST00000645491.1	known	0.83	29	6	29	6	y	0.83	5	1	5	1	n	0.9	9	1	9	1	n	0.65	11	6	11	6	y	0.75	30	10	30	10	y	0.71	10	4	10	4	y	0.0172921	-4.02492	down	ENSG00000170445.16
novel_NIR_13135	chr12	110378650	110381752	-	110376216	110381752	A3SS	ENST00000552087.1	novel	0.12	2	14	2	14	n	0.22	2	7	2	7	y	0.18	2	9	2	9	y	0	0	7	0	7	n	0	0	16	0	16	n	0.07	1	14	1	14	n	0.0172921	-4.02492	down	ENSG00000196510.14
known_NIR_30359	chr2	152677475	152679352	-	152679109	152679352	3pMXE	ENST00000448428.2	known	0	0	15	0	15	n	0	0	16	0	16	n	0	0	4	0	4	n	0.17	2	10	2	10	y	0.11	1	8	1	8	n	0.17	4	19	4	19	y	0.0173173	7.5	up	ENSG00000196504.19
novel_NIR_53109	chr5	56912258	56913011	+	56910394	56913011	A5SS	ENST00000463805.5	novel	0.25	2	6	2	6	y	-	-	-	-	-	-	0.29	2	5	2	5	y	1	4	0	4	0	y	-	-	-	-	-	-	1	6	0	6	0	y	0.0174373	36.5	up	ENSG00000155542.12
novel_NIR_12927	chr12	10610680	10613484	-	10610680	10613541	A5SS	ENST00000539554.5	novel	0.33	4	8	4	8	y	0.13	2	13	2	13	n	0	0	9	0	9	n	-	-	-	-	-	-	0.86	6	1	6	1	y	0.87	13	2	13	2	y	0.0174893	7.40512	up	ENSG00000111196.10
novel_NIR_21752	chr15	69337501	69359317	+	69337501	69359966	A3SS	ENST00000395407.7	novel	0.27	3	8	3	8	y	0.17	5	25	5	25	n	0.21	8	31	8	31	n	0	0	23	0	23	n	0	0	35	0	35	n	0	0	19	0	19	n	0.0175169	-7.45601	down	ENSG00000137819.14
known_NIR_45690	chr7	123545676	123546658	-	123545676	123557404	A5SS	ENST00000618945.4	known	0.49	23	24	23	24	y	0.5	11	11	11	11	y	0.43	6	8	6	8	y	0.65	17	9	17	9	y	0.56	14	11	14	11	y	0.62	16	10	16	10	y	0.0175271	3.98227	up	ENSG00000128609.16
novel_NIR_18224	chr14	103677523	103679408	+	103677523	103679384	A3SS	ENST00000348520.10	novel	0.13	19	127	19	127	n	0.07	15	198	15	198	n	0.09	8	86	8	86	n	0.16	20	103	20	103	y	0.21	28	108	28	108	y	0.22	34	122	34	122	y	0.0175437	3.90567	up	ENSG00000126214.21
known_NIR_17419	chr15	65605236	65607302	-	65605236	65607159	A5SS	ENST00000573314.5	known	0.18	6	28	6	28	y	0.14	7	43	7	43	y	0.11	4	31	4	31	y	0	0	37	0	37	n	0.02	1	58	1	58	n	0.07	4	51	4	51	y	0.0175636	-3.90007	down	ENSG00000138614.15
known_NIR_34615	chr20	63706738	63707867	-	63706738;63707092	63706999;63707867	ES	ENST00000614942.4	known	0.09	10	99	10	171;27	y	0.03	4	111.5	4	206;17	y	0.06	6	97.5	6	177;18	y	0.17	17	84.5	17	156;13	y	0.14	22	132	22	244;20	y	0.15	21	116.5	21	209;24	y	0.0175649	4.80196	up	ENSG00000101246.20
known_NIR_37523	chr3	180985996	180989600	-	180988096	180989600	3pMXE	ENST00000485675.1	known	0.75	3	1	3	1	n	0.43	3	4	3	4	n	0.5	6	6	6	6	y	0	0	3	0	3	n	0.18	2	9	2	9	y	0	0	5	0	5	n	0.0176736	-4.37968	down	ENSG00000205981.8
known_NIR_52002	chrX	152767925	152769654	-	152767861	152769654	A3SS	ENST00000329342.9	known	0.71	34	14	34	14	y	0.75	36	12	36	12	y	0.62	18	11	18	11	y	0.45	29	35	29	35	y	0.5	15	15	15	15	y	0.52	22	20	22	20	y	0.0176788	-4.65121	down	ENSG00000197172.10
known_NIR_2675	chr1	228141507	228145511	+	228140159	228145511	A5SS	ENST00000366730.5	known	1	9	0	9	0	n	-	-	-	-	-	-	1	9	0	9	0	n	0.63	12	7	12	7	y	0.75	9	3	9	3	y	0.6	3	2	3	2	n	0.0176856	-7.41941	down	ENSG00000143774.17
known_NIR_10683	chr12	116760621	116766814	+	116754060	116766814	A5SS	ENST00000392549.7	known	0.23	9	31	9	31	y	0.24	9	29	9	29	y	0.11	2	17	2	17	y	0.52	17	16	17	16	y	0.66	19	10	19	10	y	0.43	10	13	10	13	y	0.0177658	4.35254	up	ENSG00000135119.15
known_NIR_15326	chr14	24441795	24442098	-	24441795	24442109	A5SS	ENST00000556523.1	known	0.25	3	9	3	9	y	0.42	8	11	8	11	y	0	0	1	0	1	n	1	7	0	7	0	n	0.85	11	2	11	2	y	0.8	8	2	8	2	y	0.0178089	4.85387	up	ENSG00000100445.18
known_NIR_48041	chr8	10765916	10826152	-	10765916;10820269	10820193;10826152	ES	ENST00000314787.8	known	0.3	87	202	87	179;225	y	0.3	86	197.5	86	196;199	y	0.27	64	177.5	64	172;183	y	0.21	49	184	49	198;170	y	0.23	75	255	75	232;278	y	0.25	64	192	64	174;210	y	0.0178099	-3.92792	down	ENSG00000254093.9
known_NIR_33711	chr20	36236782	36239821	+	36237037	36239821	A5SS	ENST00000679667.1	known	0.05	1	19	1	19	n	0	0	6	0	6	n	0	0	13	0	13	n	0.32	6	13	6	13	y	0.18	2	9	2	9	y	0.29	8	20	8	20	y	0.0178574	5.397	up	ENSG00000131043.13
novel_NIR_68651	chrX	55159228	55160835	-	55159228	55160743	A5SS	ENST00000478918.1	novel	0.33	1	2	1	2	n	0.33	1	2	1	2	n	0.57	4	3	4	3	y	1	1	0	1	0	n	1	1	0	1	0	n	-	-	-	-	-	-	0.0178935	7.375	up	ENSG00000182518.13
novel_NIR_18900	chr14	26724794;26735372	26735242;26806236	+	26724794;26782208	26779795;26806236	MXE	ENST00000671020.1	novel	0.28	3.5	9	0;7	5;13	n	0.39	4.5	7	2;7	5;9	y	0.33	1.5	3	0;3	4;2	n	0.08	0.5	5.5	0;1	8;3	n	0	0	5	0;0	1;9	n	0.17	1.5	7.5	0;3	7;8	n	0.017921	-4.27352	down	ENSG00000257842.6
novel_NIR_30037	chr17	81859387	81859506	-	81859387	81860347	A5SS	ENST00000575069.6	novel	1	2	0	2	0	y	0.67	4	2	4	2	y	1	1	0	1	0	n	0.44	4	5	4	5	y	0	0	3	0	3	n	0	0	2	0	2	n	0.0179212	-4.05455	down	ENSG00000185624.16
known_NIR_36236	chr22	50248859	50249103	-	50248890	50249103	A3SS	ENST00000415993.5	known	0.21	10	37	10	37	y	0.15	16	89	16	89	y	0.15	7	40	7	40	y	0.06	3	47	3	47	y	0	0	45	0	45	n	0.08	6	67	6	67	y	0.0179931	-3.94421	down	ENSG00000100429.18
known_NIR_46553	chr7	26174782;26185279	26185199;26192495	-	26174782	26192495	cassetteExon	ENST00000679318.1	known	1	6.5	0	6;7	0	n	1	3	0	0;6	0	n	1	1	0	0;2	0	n	0.69	9	4	10;8	4	y	0.6	3	2	0;6	2	n	0.5	5	5	8;2	5	y	0.0180111	-7.35023	down	ENSG00000122566.22
known_NIR_37029	chr3	138187599;138188530	138188401;138209817	+	138187599	138209817	cassetteExon	ENST00000538260.5	known	0.7	7	3	0;14	3	n	0.59	8.5	6	3;14	6	y	0.7	14	6	0;28	6	n	0.43	1.5	2	0;3	2	n	0.5	4	4	0;8	4	n	0.5	6	6	0;12	6	n	0.0180372	-4.295	down	ENSG00000114098.18
novel_NIR_19722	chr14	73266831	73268510	+	73266831	73268557	A3SS	ENST00000340738.9	novel	0	0	20	0	20	n	0.04	2	51	2	51	n	0	0	27	0	27	n	0.26	10	29	10	29	y	0.3	20	46	20	46	y	0.17	6	29	6	29	y	0.0180551	5.6527	up	ENSG00000100767.17
known_NIR_31101	chr2	218694635	218696527	+	218694635	218696590	A3SS	ENST00000392105.7	known	0.61	25	16	25	16	y	0.45	10	12	10	12	y	0.5	2	2	2	2	n	0.77	23	7	23	7	y	0.83	15	3	15	3	y	0.79	15	4	15	4	y	0.0180587	5.48479	up	ENSG00000163482.12
known_NIR_35749	chr22	32475398	32479133	+	32475124	32479133	A5SS	ENST00000425028.5	known	0.46	12	14	12	14	y	0.36	12	21	12	21	y	0.44	16	20	16	20	y	0.15	6	33	6	33	y	0.09	3	31	3	31	y	0.26	12	34	12	34	y	0.0183298	-4.33755	down	ENSG00000100225.18
novel_NIR_16162	chr12	6355880	6361011	-	6355880	6362068	A5SS	ENST00000540037.5	novel	0.71	5	2	5	2	y	0.57	8	6	8	6	y	0.5	2	2	2	2	y	0.35	6	11	6	11	y	0.09	2	20	2	20	n	0.15	5	28	5	28	y	0.018405	-3.96887	down	ENSG00000111319.13
known_NIR_15949	chr14	73277293;73279424	73279281;73282359	-	73277293	73282359	cassetteExon	ENST00000554546.5	known	0.69	30.5	14	28;33	14	y	0.81	25.5	6	27;24	6	y	0.79	15	4	19;11	4	y	0.42	23.5	32	10;37	32	y	0.55	18.5	15	16;21	15	y	0.58	23.5	17	28;19	17	y	0.0184568	-4.00732	down	ENSG00000133961.21
novel_NIR_63455	chr8	22024257	22025436	+	22025306	22025436	A5SS&ES	ENST00000397940.5	novel	0.33	2	4	2	4	y	0.33	2	4	2	4	y	-	-	-	-	-	-	0	0	1	0	1	n	0.12	1	7	1	7	n	0	0	8	0	8	n	0.0184987	-7.25	down	ENSG00000158806.14
novel_NIR_55037	chr6	26127761	26138054	+	26124633	26138054	A5SS	ENST00000602637.1	novel	0.44	27	35	27	35	n	0.56	40	31	40	31	n	0.32	8	17	8	17	n	0.73	45	17	45	17	n	0.88	30	4	30	4	y	0.75	45	15	45	15	n	0.0186542	4.14017	up	ENSG00000180573.10
known_NIR_13612	chr12	8992310	9008975	+	8992310;8995288	8995119;9008975	ES	ENST00000539240.5	known	0.6	6	4	6	6;2	y	0.56	7	5.5	7	2;9	y	0.47	4	4.5	4	5;4	y	0.29	1	2.5	1	3;2	n	0.27	2	5.5	2	3;8	y	0.29	2	5	2	5;5	y	0.0187211	-6.66399	down	ENSG00000139187.10
known_NIR_26866	chr19	1820180	1820264	-	1820057	1820264	A3SS	ENST00000170168.9	known	0.08	10	122	10	122	y	0.11	19	154	19	154	y	0.12	18	131	18	131	y	0.03	6	168	6	168	y	0.06	9	131	9	131	y	0.04	6	147	6	147	y	0.0187267	-4.02492	down	ENSG00000079313.15
known_NIR_27329	chr19	34196763;34209051	34208929;34215596	+	34196763;34215300	34215124;34215596	MXE	ENST00000540746.6	known	0.52	32.5	29.5	58;7	0;59	n	0.53	54	47.5	89;19	0;95	n	0.56	32	25	61;3	2;48	y	0.45	36	43.5	67;5	0;87	n	0.44	27	34	48;6	0;68	n	0.49	41	42	73;9	0;84	n	0.0187422	-3.94447	down	ENSG00000257103.9
novel_NIR_52385	chr5	179608616	179609376	+	179608465	179609376	A5SS	ENST00000508797.1	novel	0	0	6	0	6	n	0.12	1	7	1	7	n	-	-	-	-	-	-	0.89	8	1	8	1	n	0.58	11	8	11	8	n	0.54	7	6	7	6	y	0.018753	4.84779	up	ENSG00000176783.15
novel_NIR_23562	chr16	3020491	3021240	+	3020491	3021160	3pMXE	ENST00000575836.1	novel	0.67	8	4	8	4	y	0.65	11	6	11	6	y	0.47	7	8	7	8	y	0.17	2	10	2	10	y	-	-	-	-	-	-	0.2	2	8	2	8	y	0.018775	-6.30028	down	ENSG00000006327.14
known_NIR_17268	chr15	60386086;60396427	60396373;60397943	-	60386086;60393440	60393239;60397943	MXE	ENST00000677968.1	known	0.73	4	1.5	2;6	1;2	n	0.83	5	1	2;8	2;0	n	1	3	0	3;3	0;0	n	0.5	1	1	0;2	0;2	n	0.36	2	3.5	0;4	0;7	n	0.5	5	5	5;5	4;6	y	0.0188033	-4.36725	down	ENSG00000182718.18
known_NIR_32736	chr2	74458671	74458832	+	74458671	74458997	A3SS	ENST00000393972.7	known	0.6	6	4	6	4	y	0.5	1	1	1	1	n	0.6	3	2	3	2	n	0.1	1	9	1	9	n	0.15	2	11	2	11	y	0.33	1	2	1	2	n	0.018836	-4.82418	down	ENSG00000239779.7
known_NIR_3951	chr1	43838311	43894383	+	43879507	43894383	5pMXE	ENST00000645644.1	known	1	36	0	36	0	n	0.94	47	3	47	3	y	1	19	0	19	0	n	0.84	21	4	21	4	y	0.91	21	2	21	2	y	0.85	53	9	53	9	y	0.0189656	-3.8253	down	ENSG00000126091.21
novel_NIR_38633	chr2	36360067	36378357	+	36356623	36378357	A5SS	ENST00000428774.1	novel	0	0	8	0	8	n	0.17	2	10	2	10	y	0	0	9	0	9	n	1	4	0	4	0	y	0.6	6	4	6	4	y	0.64	7	4	7	4	y	0.0190972	4.95533	up	ENSG00000150938.10
known_NIR_29546	chr19	58230497	58243965	+	58230462	58243965	A5SS	ENST00000599227.5	known	0.05	6	111	6	111	y	0.07	11	158	11	158	y	0.09	10	105	10	105	y	0.11	13	101	13	101	y	0.15	19	112	19	112	y	0.14	25	149	25	149	y	0.0191597	3.8	up	ENSG00000198131.14
known_NIR_47180	chr7	56074218	56076834	+	56068638	56076834	A5SS	ENST00000436782.5	known	0.83	54	11	54	11	y	0.85	57	10	57	10	y	0.87	52	8	52	8	y	0.93	65	5	65	5	y	0.92	44	4	44	4	y	0.89	56	7	56	7	y	0.0191597	3.8	up	ENSG00000129103.19
known_NIR_52917	chrX	73944662	73998768	+	73944662;73994961	73994840;73998768	ES	ENST00000664637.1	known	0.11	2	16.5	2	27;6	y	0	0	19	0	30;8	n	0.07	1	12.5	1	19;6	n	0.19	2	8.5	2	11;6	y	0.26	5	14	5	23;5	y	0.21	6	22.5	6	41;4	y	0.0191684	4.17786	up	ENSG00000225470.8
novel_NIR_27255	chr17	38848039	38850125	-	38848039	38850117	A5SS	ENST00000394332.5	novel	0.38	15	24	15	24	y	0.22	15	52	15	52	y	0.37	16	27	16	27	y	0	0	45	0	45	n	0	0	38	0	38	n	0.15	5	29	5	29	y	0.0191684	-3.79858	down	ENSG00000125691.14
known_NIR_33910	chr20	38562697	38565359	+	38562697	38565356	A3SS	ENST00000397042.7	known	0.62	20	12	20	12	y	0.51	22	21	22	21	y	0.58	7	5	7	5	y	0.39	7	11	7	11	y	0.46	6	7	6	7	y	0.38	10	16	10	16	y	0.0192048	-3.91918	down	ENSG00000170471.15
known_NIR_18819	chr16	2752854	2757472	+	2752846	2757472	A5SS	ENST00000575009.5	known	0.4	2	3	2	3	n	0.24	8	25	8	25	y	0.43	3	4	3	4	n	0.16	3	16	3	16	y	0	0	13	0	13	n	0	0	19	0	19	n	0.0192106	-3.81492	down	ENSG00000167978.17
known_NIR_6452	chr10	97454799	97455639	+	97454799	97455714	A3SS	ENST00000459777.5	known	0.1	5	45	5	45	y	0.19	7	30	7	30	y	0.17	4	19	4	19	y	0	0	38	0	38	n	0.05	3	63	3	63	y	0	0	40	0	40	n	0.0192382	-4.27455	down	ENSG00000171307.19
novel_NIR_756	chr1	1435821	1439081	+	1435821	1436807	3pMXE	ENST00000471398.1	novel	1	6	0	6	0	y	1	2	0	2	0	y	1	6	0	6	0	y	0.33	1	2	1	2	n	0	0	2	0	2	n	0.33	1	2	1	2	n	0.0193139	-7.09091	down	ENSG00000179403.12
novel_NIR_50917	chr4	99081084	99081365	-	99080725	99081365	A3SS	ENST00000508146.5	novel	0.67	4	2	4	2	y	0.67	2	1	2	1	y	1	1	0	1	0	n	-	-	-	-	-	-	0	0	1	0	1	n	0	0	7	0	7	n	0.0193139	-7.09091	down	ENSG00000197894.12
known_NIR_2911	chr1	2410451	2412391	-	2410451	2410630	5pMXE	ENST00000502666.1	known	1	84	0	84	0	n	0.99	78	1	78	1	n	1	47	0	47	0	n	0.95	59	3	59	3	y	0.96	85	4	85	4	y	0.93	69	5	69	5	y	0.0193257	-5.3033	down	ENSG00000157911.11
known_NIR_31525	chr2	238064469	238081709	+	238064469	238068065	3pMXE	ENST00000449191.1	known	0.01	1	98	1	98	n	0	0	148	0	148	n	0.03	2	77	2	77	y	0.06	6	103	6	103	y	0.06	7	113	7	113	y	0.07	8	113	8	113	y	0.0193257	5.3033	up	ENSG00000258984.5
novel_NIR_56054	chr6	42934598;42935473	42935412;42935574	+	42934598	42935574	cassetteExon	ENST00000394142.7	novel	0.18	75	340	81;69	340	y	0.17	90	425	84;96	425	y	0.18	64.5	289	71;58	289	y	0.21	93.5	362	99;88	362	y	0.23	108	369	104;112	369	y	0.24	117.5	365	104;131	365	y	0.0193257	5.3033	up	ENSG00000137161.17
known_NIR_8238	chr11	57496164	57500779	-	57496164;57497845	57497753;57500779	ES	ENST00000278426.8	known	0.21	18	67.5	18	83;52	y	0.14	12	72	12	90;54	y	0.18	14	65	14	99;31	y	0.1	7	62	7	87;37	y	0.08	12	132.5	12	169;96	y	0.05	4	84.5	4	105;64	y	0.0194128	-4.00892	down	ENSG00000149150.9
known_NIR_4794	chr1	86384801	86386915	-	86384801;86385590	86385458;86386915	ES	ENST00000359242.7	known	0.4	2	3	2	4;2	n	0.67	4	2	4	3;1	n	0.57	2	1.5	2	0;3	n	0.27	2	5.5	2	4;7	y	0	0	3.5	0	7;0	n	0	0	4	0	8;0	n	0.0194298	-3.81736	down	ENSG00000122417.15
known_NIR_11758	chr12	47700164	47701464	-	47697719	47701464	A3SS	ENST00000005386.8	known	0.67	37	18	37	18	y	0.58	28	20	28	20	y	0.57	12	9	12	9	y	0.8	44	11	44	11	y	0.78	36	10	36	10	y	0.75	43	14	43	14	y	0.0194508	4.86266	up	ENSG00000005175.10
known_NIR_5628	chr10	28526008	28531735	-	28526008	28532442	A5SS	ENST00000527986.5	known	0	0	13	0	13	n	0.09	1	10	1	10	n	0	0	3	0	3	n	0.4	2	3	2	3	n	0.33	4	8	4	8	y	0.21	3	11	3	11	y	0.0194921	4.49239	up	ENSG00000254635.6
known_NIR_4308	chr1	52263872	52268463	+	52263872;52266831	52266655;52268463	ES	ENST00000287727.8	known	0.32	4	8.5	4	9;8	y	0.31	4	9	4	10;8	y	0.37	5	8.5	5	6;11	y	0	0	8.5	0	16;1	n	0	0	9	0	8;10	n	0.15	1	5.5	1	9;2	n	0.019593	-5.3125	down	ENSG00000157077.16
known_NIR_3095	chr1	2588453	2588922	+	2588453	2588954	A3SS	ENST00000378425.9	known	0	0	4	0	4	n	0	0	2	0	2	n	0.29	4	10	4	10	y	0.44	4	5	4	5	n	0.75	3	1	3	1	n	0.8	4	1	4	1	n	0.0196037	3.81854	up	ENSG00000157870.17
known_NIR_7602	chr11	3361889;3362602	3362546;3370975	-	3361889	3370975	cassetteExon	ENST00000399602.9	known	0.33	1	2	1;1	2	n	0.11	1	8	1;1	8	n	0.27	1.5	4	2;1	4	n	0.5	5	5	4;6	5	y	0.54	10.5	9	11;10	9	y	0.71	2.5	1	5;0	1	n	0.0196183	3.77	up	ENSG00000005801.18
known_NIR_30287	chr2	131108064	131120934	+	131105398	131120934	A5SS	ENST00000409158.5	known	0.09	3	30	3	30	y	0.16	4	21	4	21	y	0.16	5	26	5	26	y	0	0	42	0	42	n	0	0	40	0	40	n	0.03	1	32	1	32	n	0.0196237	-4.98964	down	ENSG00000115762.16
known_NIR_52550	chrX	48511935	48514240	+	48511935	48512326	A3SS&ES	ENST00000684722.1	known	0.01	1	97	1	97	n	0	0	53	0	53	n	0	0	57	0	57	n	0.06	4	60	4	60	y	0.1	6	53	6	53	y	0.07	4	50	4	50	y	0.0196825	5.87975	up	ENSG00000102312.24
known_NIR_49609	chr8	47291137;47294030	47293867;47440323	+	47291137;47396626	47396376;47440323	MXE	ENST00000517824.5	known	0.9	75	8.5	138;12	11;6	y	0.9	75	8.5	146;4	7;10	y	0.92	52.5	4.5	104;1	5;4	n	0.85	72	13	134;10	9;17	y	0.86	50.5	8	92;9	10;6	y	0.88	76	10.5	139;13	7;14	y	0.0197794	-3.91965	down	ENSG00000164808.17
known_NIR_6792	chr11	119056167	119057027	-	119056167	119057020	A5SS	ENST00000617285.5	known	0	0	55	0	55	n	0	0	78	0	78	n	0	0	21	0	21	n	0.04	2	53	2	53	y	0.06	3	47	3	47	y	0.04	2	48	2	48	y	0.0198039	7	up	ENSG00000149428.19
known_NIR_21312	chr17	15239611	15262429	-	15260761	15262429	A3SS&ES	ENST00000395938.7	known	0	0	49	0	49	n	0	0	69	0	69	n	0	0	33	0	33	n	0.02	2	83	2	83	y	0.03	2	70	2	70	y	0.02	2	106	2	106	y	0.0198039	7	up	ENSG00000109099.16
known_NIR_22170	chr17	39637515	39653481	+	39637231	39653481	A5SS	ENST00000580551.5	known	0	0	109	0	109	n	0	0	105	0	105	n	0	0	53	0	53	n	0.03	2	76	2	76	y	0.02	2	87	2	87	y	0.02	2	94	2	94	y	0.0198039	7	up	ENSG00000131748.16
known_NIR_24868	chr17	81917719	81918039	-	81917719;81917967	81917830;81918039	ES	ENST00000571832.5	known	0.02	3	118.5	3	115;122	y	0.02	2	110	2	132;88	y	0.03	2	69	2	83;55	y	0	0	112.5	0	137;88	n	0	0	66	0	73;59	n	0	0	83.5	0	88;79	n	0.0198039	-7	down	ENSG00000187531.14
known_NIR_28511	chr19	45779278	45779439	-	45779359	45779439	A3SS	ENST00000682335.1	known	0	0	57	0	57	n	0	0	49	0	49	n	0	0	38	0	38	n	0.02	1	56	1	56	n	0.02	2	96	2	96	y	0.03	2	61	2	61	y	0.0198039	7	up	ENSG00000104936.20
known_NIR_30887	chr2	202214434	202238440	-	202220106	202238440	A3SS&ES	ENST00000409205.5	known	0	3	605	3	605	y	0	2	670	2	670	y	0	0	395	0	395	n	0.02	9	562	9	562	y	0.03	16	537	16	537	y	0.02	12	573	12	573	y	0.0198039	7	up	ENSG00000116030.17
known_NIR_35058	chr21	45282459	45285678	-	45282459;45283527	45283383;45285678	ES	ENST00000331343.11	known	0.01	1	85.5	1	96;75	n	0.02	2	113.5	2	126;101	y	0.02	1	58.5	1	69;48	n	0.04	3	71	3	89;53	y	0.04	3	75.5	3	69;82	y	0.04	4	104.5	4	115;94	y	0.0198039	7	up	ENSG00000186866.17
known_NIR_47595	chr7	79453789	79458847	+	79455007	79458847	A5SS&ES	ENST00000683943.1	known	0.02	2	110	2	110	y	0.02	2	96	2	96	y	0.03	2	71	2	71	y	0	0	86	0	86	n	0	0	73	0	73	n	0	0	98	0	98	n	0.0198039	-7	down	ENSG00000234456.9
known_NIR_28467	chr19	45633139	45634322	-	45633139	45638845	A5SS	ENST00000586195.5	known	1	121	0	121	0	n	1	118	0	118	0	n	1	101	0	101	0	n	0.97	111	3	111	3	y	0.98	111	2	111	2	y	0.98	119	3	119	3	y	0.0198039	-7	down	ENSG00000125746.18
novel_NIR_49282	chr4	152807248	152809190	+	152807248	152809673	A3SS	ENST00000510831.5	novel	1	2	0	2	0	n	1	4	0	4	0	n	1	2	0	2	0	n	0.17	1	5	1	5	n	0.33	1	2	1	2	n	0.5	5	5	5	5	y	0.0198198	-6.99711	down	ENSG00000164144.16
known_NIR_21815	chr17	28720430	28720707	+	28720213	28720707	A5SS	ENST00000496182.5	known	0.96	177	8	177	8	y	0.95	249	12	249	12	y	0.97	139	5	139	5	y	0.89	213	26	213	26	y	0.92	197	16	197	16	y	0.92	218	18	218	18	y	0.0198868	-4.33013	down	ENSG00000198242.14
known_NIR_44333	chr6	32154777;32155183	32155030;32155768	+	32154777	32155768	cassetteExon	ENST00000424499.1	known	1	44.5	0	85;4	0	n	0.96	49	2	97;1	2	n	1	25.5	0	49;2	0	n	0.92	36.5	3	71;2	3	y	0.93	27	2	52;2	2	y	0.88	35	5	70;0	5	n	0.0200658	-3.78118	down	ENSG00000221988.13
known_NIR_15638	chr14	57479025	57480595	-	57471590	57480595	A3SS	ENST00000216445.8	known	0.43	10	13	10	13	y	0.22	2	7	2	7	n	0.4	2	3	2	3	n	0.62	5	3	5	3	n	0.76	13	4	13	4	y	0.63	12	7	12	7	y	0.0200834	4.021	up	ENSG00000100557.10
known_NIR_5908	chr10	5960567	5977405	-	5960567	5966145	A5SS&ES	ENST00000532948.5	known	0.06	6	100	6	100	y	0.05	5	94	5	94	y	0.03	2	64	2	64	y	0.11	9	70	9	70	y	0.08	10	112	10	112	y	0.09	7	69	7	69	y	0.0200921	3.74166	up	ENSG00000134470.21
known_NIR_17225	chr15	60386086;60393440	60393013;60397943	-	60386086;60390317	60390213;60397943	MXE	ENST00000396024.7	known	0.03	1.5	52.5	1;2	85;20	n	0.05	3	55	6;0	96;14	n	0.06	2.5	40.5	5;0	62;19	n	0.22	15	52	28;2	80;24	y	0.17	6.5	31.5	6;7	57;6	y	0.14	11.5	71.5	17;6	119;24	y	0.0201483	5.21159	up	ENSG00000182718.18
novel_NIR_28113	chr17	48550390	48550929	+	48550402	48550929	A5SS	ENST00000508688.5	novel	0.06	2	30	2	30	n	0.08	3	33	3	33	n	0.05	1	21	1	21	n	0.17	8	38	8	38	y	0.17	6	29	6	29	y	0.24	8	25	8	25	y	0.0201483	5.21159	up	ENSG00000230148.8
novel_NIR_27740	chr17	44084675	44086572	-	44084675	44085022	5pMXE	ENST00000593013.5	novel	0.19	11	46	11	46	y	0.18	12	55	12	55	y	0.12	6	45	6	45	n	0.02	1	54	1	54	n	0.04	2	52	2	52	n	0.03	2	74	2	74	n	0.0201588	-5.89768	down	ENSG00000108840.16
known_NIR_10789	chr12	120446829;120455030	120454933;120457076	+	120446829	120457076	cassetteExon	ENST00000551806.1	known	0.06	8.5	134	7;10	134	y	0.07	11	136	11;11	136	y	0.05	7	126	5;9	126	y	0.04	6	129	3;9	129	y	0.02	4.5	233	2;7	233	y	0.02	3.5	142	7;0	142	n	0.0201689	-3.77964	down	ENSG00000111780.8
known_NIR_39168	chr3	58306651	58310507	+	58310406	58310507	A5SS&ES	ENST00000295959.10	known	0.01	1	80	1	80	n	0	0	99	0	99	n	0.02	2	79	2	79	y	0.03	2	68	2	68	y	0.05	4	74	4	74	y	0.05	5	98	5	98	y	0.0201689	3.77964	up	ENSG00000163684.12
known_NIR_41827	chr5	1501603;1521480	1521347;1523710	-	1501603	1523710	cassetteExon	ENST00000475622.5	known	0.04	2	50	4;0	50	n	0.05	3.5	65	4;3	65	y	0.03	1	38	2;0	38	n	0	0	60	0;0	60	n	0.02	1	54	2;0	54	n	0	0	40	0;0	40	n	0.0201689	-3.77964	down	ENSG00000153395.10
novel_NIR_681	chr1	1267992	1273051	-	1267992	1272853	A5SS	ENST00000488418.2	novel	0.3	6	14	6	14	y	0.27	7	19	7	19	y	0.18	2	9	2	9	y	0	0	16	0	16	n	0	0	11	0	11	n	0	0	15	0	15	n	0.0201727	-6.93375	down	ENSG00000160087.21
novel_NIR_54603	chr6	151405836	151410853	-	151405836	151408643	A5SS&ES	ENST00000644711.1	novel	0.56	5	4	5	4	y	0.67	2	1	2	1	y	0.4	2	3	2	3	y	0	0	5	0	5	n	0	0	12	0	12	n	0	0	2	0	2	n	0.0201857	-6.93147	down	ENSG00000155906.20
known_NIR_2322	chr1	211396831;211399437	211399377;211426211	+	211396831	211426211	cassetteExon	ENST00000669618.1	known	0.01	1	124	2;0	124	n	0.01	1.5	120	3;0	120	n	0.01	0.5	95	1;0	95	n	0.04	5	125	10;0	125	n	0.06	7	108	12;2	108	y	0.05	6	105	11;1	105	n	0.0202041	6.9282	up	ENSG00000153363.13
known_NIR_8018	chr11	46987310	47137645	+	47052518	47137645	5pMXE	ENST00000534249.5	known	0	0	77	0	77	n	0	0	75	0	75	n	0	0	83	0	83	n	0.03	3	90	3	90	y	0.04	4	103	4	103	y	0.05	4	73	4	73	y	0.0202041	6.9282	up	ENSG00000149179.14
known_NIR_18161	chr15	90984140	90994407	-	90984140;90984825	90984693;90994407	ES	ENST00000394249.8	known	0.05	3	63	3	78;48	y	0.04	2	53.5	2	52;55	y	0.03	1	36	1	31;41	n	0	0	53.5	0	66;41	n	0	0	52.5	0	45;60	n	0	0	69.5	0	78;61	n	0.0202041	-6.9282	down	ENSG00000198901.14
known_NIR_23162	chr17	5485216	5486117	-	5485216	5485863	A5SS	ENST00000574952.5	known	0	0	2	0	2	n	0	0	4	0	4	n	0	0	2	0	2	n	0.06	1	17	1	17	n	0.1	1	9	1	9	n	0.08	2	23	2	23	y	0.0202041	6.9282	up	ENSG00000072849.11
known_NIR_36943	chr3	133574592	133575039	+	133574180	133575039	A5SS	ENST00000503932.5	known	0	0	2	0	2	n	0	0	1	0	1	n	0	0	1	0	1	n	1	4	0	4	0	n	0.8	4	1	4	1	n	0.6	6	4	6	4	y	0.0202041	6.9282	up	ENSG00000091527.16
novel_NIR_65930	chr9	21008146;21011438	21011344;21011589	-	21008146	21011589	cassetteExon	ENST00000495827.3	novel	0.14	5	31	0;10	31	n	0.16	6.5	34	0;13	34	n	0.09	4	39	0;8	39	n	0.29	9.5	23	2;17	23	y	0.4	19	28	4;34	28	y	0.28	8.5	22	0;17	22	n	0.0203142	4.42246	up	ENSG00000188921.14
known_NIR_25756	chr18	57642052	57668006	+	57642052	57667242	3pMXE	ENST00000591854.5	known	0.5	6	6	6	6	y	0.45	5	6	5	6	y	0.67	4	2	4	2	n	-	-	-	-	-	-	1	8	0	8	0	n	1	10	0	10	0	n	0.0203152	6.90864	up	ENSG00000267040.6
novel_NIR_63924	chr8	47294030	47394978	+	47294030	47407861	A3SS	ENST00000524033.5	novel	0.5	7	7	7	7	y	0.33	1	2	1	2	n	0.55	6	5	6	5	y	0	0	5	0	5	n	0	0	9	0	9	n	0	0	2	0	2	n	0.0203152	-6.90864	down	ENSG00000164808.17
known_NIR_43259	chr6	10683232	10686966	-	10683232;10684923	10684849;10686966	ES	ENST00000460742.6	known	0.64	7	4	7	6;2	y	0.62	8	5	8	5;5	y	0.67	4	2	4	4;0	n	0.8	4	1	4	2;0	n	0.84	8	1.5	8	0;3	n	0.93	14	1	14	0;2	n	0.0203387	5.19109	up	ENSG00000137434.12
known_NIR_43831	chr6	26448448	26448728	+	26444304	26448728	A5SS	ENST00000490254.5	known	0	0	2	0	2	n	0	0	5	0	5	n	-	-	-	-	-	-	1	3	0	3	0	n	0.62	8	5	8	5	y	1	4	0	4	0	n	0.0203947	6.89474	up	ENSG00000111801.16
novel_NIR_68732	chrX	68428953	68432867	-	68299096	68432867	A3SS	ENST00000680612.1	novel	-	-	-	-	-	-	1	2	0	2	0	y	1	4	0	4	0	y	0.38	3	5	3	5	y	0	0	9	0	9	n	0	0	3	0	3	n	0.0203947	-6.89474	down	ENSG00000079482.14
known_NIR_2795	chr1	234398553	234401181	-	234398553	234400853	5pMXE	ENST00000484454.1	known	0.77	70	21	70	21	y	0.8	95	24	95	24	y	0.84	47	9	47	9	y	0.88	86	12	86	12	y	0.92	61	5	61	5	y	0.91	80	8	80	8	y	0.0203964	4.24264	up	ENSG00000059588.10
known_NIR_8241	chr11	57501374	57513958	-	57501329	57513958	A3SS	ENST00000278426.8	known	0.1	4	36	4	36	y	0.03	1	39	1	39	n	0.07	3	42	3	42	y	0.17	6	29	6	29	y	0.16	8	42	8	42	y	0.24	14	44	14	44	y	0.0204371	3.81626	up	ENSG00000149150.9
known_NIR_29871	chr19	9653881	9658009	-	9653881;9656653	9656547;9658009	ES	ENST00000453372.7	known	0	0	1	0	0;2	n	0	0	3.5	0	2;5	n	0	0	1	0	0;2	n	0.4	4	6	4	8;4	y	0.57	2	1.5	2	2;1	n	0.36	2	3.5	2	6;1	n	0.0204422	6.88648	up	ENSG00000171466.10
novel_NIR_30328	chr17	8436045	8436257	+	8436045	8443927	A3SS	ENST00000584866.1	novel	0.6	6	4	6	4	y	0.64	7	4	7	4	y	-	-	-	-	-	-	0	0	2	0	2	n	-	-	-	-	-	-	0	0	2	0	2	n	0.020529	-31	down	ENSG00000166579.16
known_NIR_23507	chr17	6641642	6641753	+	6641100	6641753	A5SS	ENST00000576020.5	known	0	0	12	0	12	n	0	0	8	0	8	n	0	0	10	0	10	n	0.2	5	20	5	20	y	0.33	4	8	4	8	y	0.25	2	6	2	6	n	0.0205518	6.86752	up	ENSG00000129235.11
novel_NIR_3034	chr1	211260164	211260866	+	211260164	211260929	A3SS	ENST00000472734.1	novel	0.25	2	6	2	6	y	0.2	2	8	2	8	y	0.33	2	4	2	4	y	0	0	3	0	3	n	0	0	9	0	9	n	0	0	6	0	6	n	0.0205518	-6.86752	down	ENSG00000117625.14
novel_NIR_55537	chr6	31744303	31744546	+	31744299	31744546	A5SS	ENST00000375755.8	novel	0	0	13	0	13	n	0	0	11	0	11	n	0	0	5	0	5	n	0.33	7	14	7	14	y	0.2	4	16	4	16	y	0.25	8	24	8	24	y	0.0205518	6.86752	up	ENSG00000204410.16
novel_NIR_34387	chr19	48373258	48373517	+	48365935	48373517	A5SS	ENST00000344846.7	novel	0.23	3	10	3	10	y	0.44	8	10	8	10	y	0	0	3	0	3	n	1	3	0	3	0	y	0.83	5	1	5	1	y	0.81	17	4	17	4	y	0.0206561	4.66935	up	ENSG00000105467.9
known_NIR_2679	chr1	228144752	228145511	+	228140159	228145511	A5SS	ENST00000366730.5	known	1	11	0	11	0	n	1	6	0	6	0	n	1	8	0	8	0	n	0.67	14	7	14	7	y	0.5	3	3	3	3	n	0.67	4	2	4	2	n	0.0208094	-6.82353	down	ENSG00000143774.17
known_NIR_29345	chr19	55084642	55085841	+	55083644	55085841	A5SS	ENST00000586329.5	known	0.43	9	12	9	12	y	0.35	6	11	6	11	y	0.36	4	7	4	7	y	0	0	7	0	7	n	0	0	13	0	13	n	0.18	5	23	5	23	y	0.0208281	-4.91823	down	ENSG00000131037.15
known_NIR_29987	chr2	108472899	108474789	+	108472899	108475535	A3SS	ENST00000309863.11	known	-	-	-	-	-	-	1	2	0	2	0	n	1	2	0	2	0	n	0	0	1	0	1	n	0.4	2	3	2	3	n	0.23	3	10	3	10	y	0.0208534	-6.81609	down	ENSG00000135968.21
known_NIR_42087	chr5	176532516	176537731	-	176532516	176536940	5pMXE	ENST00000274811.9	known	0.74	23	8	23	8	y	0.74	26	9	26	9	y	0.55	17	14	17	14	y	0.16	4	21	4	21	y	0.3	6	14	6	14	y	0.43	10	13	10	13	y	0.0208853	-3.78322	down	ENSG00000146083.12
known_NIR_31806	chr2	25379323;25383889	25383836;25387289	-	25379323	25387289	cassetteExon	ENST00000495466.6	known	0.7	30.5	13	34;27	13	y	0.67	26.5	13	27;26	13	y	0.65	16.5	9	21;12	9	y	0.52	25	23	35;15	23	y	0.38	16	26	18;14	26	y	0.42	20	28	27;13	28	y	0.0209397	-5.2915	down	ENSG00000138101.19
known_NIR_12705	chr12	56172704	56173696	-	56172704;56173029	56172937;56173696	ES	ENST00000550164.6	known	0.91	52	5	52	4;6	y	0.87	48	7	48	10;4	y	0.85	20	3.5	20	3;4	y	0.98	63	1	63	0;2	n	0.98	40	1	40	1;1	n	0.96	53	2	53	3;1	n	0.0209546	5.12652	up	ENSG00000139613.12
known_NIR_44024	chr6	30722214	30722537	+	30717639	30722537	A5SS	ENST00000681435.1	known	0.94	65	4	65	4	y	0.88	43	6	43	6	y	-	-	-	-	-	-	-	-	-	-	-	-	0	0	2	0	2	n	0	0	5	0	5	n	0.0209799	-30.3333	down	ENSG00000196230.14
known_NIR_13787	chr13	102766580	102768260	-	102766580;102767478	102767273;102768260	ES	ENST00000376032.9	known	0.07	8	104	8	136;72	y	0.07	8	107.5	8	134;81	y	0.04	4	85.5	4	127;44	y	0.11	14	110.5	14	127;94	y	0.12	13	94.5	13	118;71	y	0.12	16	115	16	129;101	y	0.020998	5.37587	up	ENSG00000151287.17
known_NIR_20793	chr16	87708075	87708350	-	87703432	87708350	A3SS	ENST00000567298.5	known	0.88	239	32	239	32	y	0.87	284	44	284	44	y	0.89	198	24	198	24	y	0.92	227	19	227	19	y	0.9	258	29	258	29	y	0.91	260	25	260	25	y	0.0213116	3.67423	up	ENSG00000104731.14
known_NIR_27481	chr19	35748758	35752051	+	35748758	35752176	A3SS	ENST00000590706.6	known	0	0	174	0	174	n	0.01	2	160	2	160	y	0.02	3	124	3	124	y	0.03	5	161	5	161	y	0.04	7	164	7	164	y	0.05	6	114	6	114	y	0.0213116	3.67423	up	ENSG00000267796.8
known_NIR_35078	chr21	46188821	46191881	-	46188821;46191235	46191076;46191881	ES	ENST00000491729.1	known	0.06	7	109.5	7	0;219	n	0.07	9	122.5	9	2;243	y	0.08	7	80	7	5;155	y	0.05	6	112	6	2;222	y	0.03	4	114	4	2;226	y	0.04	5	110	5	7;213	y	0.0213116	-3.67423	down	ENSG00000160285.15
known_NIR_6102	chr10	73795663	73796774	+	73796403	73796774	5pMXE	ENST00000487278.1	known	0.95	70	4	70	4	y	0.99	94	1	94	1	n	0.97	68	2	68	2	y	0.93	50	4	50	4	y	0.91	80	8	80	8	y	0.89	75	9	75	9	y	0.0213116	-3.67423	down	ENSG00000214655.11
known_NIR_11584	chr12	31074327	31078390	+	31074091	31078390	A5SS	ENST00000542129.5	known	0.09	4	41	4	41	y	0.08	3	33	3	33	y	0.13	5	33	5	33	y	0.05	2	35	2	35	y	0	0	35	0	35	n	0	0	41	0	41	n	0.0213723	-3.68605	down	ENSG00000013573.17
known_NIR_16704	chr15	37066537	37083771	-	37036959	37083771	A3SS	ENST00000561208.6	known	0.19	3	13	3	13	y	0.19	5	21	5	21	y	0.3	3	7	3	7	y	0	0	13	0	13	n	0.11	2	17	2	17	y	0	0	16	0	16	n	0.0215025	-3.6641	down	ENSG00000134138.20
novel_NIR_58283	chr7	139360322;139363259	139363176;139376062	+	139360322;139375583	139374401;139376062	MXE	ENST00000608368.5	novel	1	4	0	8;0	0;0	n	1	6.5	0	10;3	0;0	y	1	4	0	6;2	0;0	y	0.71	5	2	10;0	0;4	n	0.83	5	1	10;0	0;2	n	0.75	1.5	0.5	3;0	1;0	n	0.0215038	-6.70887	down	ENSG00000146963.18
novel_NIR_58285	chr7	139360322;139363452	139363176;139376062	+	139360322;139375583	139374401;139376062	MXE	ENST00000608368.5	novel	1	5	0	8;2	0;0	y	1	5	0	10;0	0;0	n	1	6.5	0	6;7	0;0	y	0.71	5	2	10;0	0;4	n	0.83	5	1	10;0	0;2	n	0.75	1.5	0.5	3;0	1;0	n	0.0215038	-6.70887	down	ENSG00000146963.18
known_NIR_48364	chr8	127209717	127218810	-	127203220	127218810	A3SS	ENST00000641991.1	known	0.86	6	1	6	1	n	0.56	5	4	5	4	n	0.86	12	2	12	2	y	0.15	2	11	2	11	y	0.39	7	11	7	11	y	0.31	4	9	4	9	y	0.0215329	-3.89485	down	ENSG00000254166.3
known_NIR_9366	chr11	70420510	70422940	+	70420510	70421470	3pMXE	ENST00000483662.2	known	0.38	148	237	148	237	y	0.37	166	287	166	287	y	0.41	135	195	135	195	y	0.49	230	236	230	236	y	0.44	182	230	182	230	y	0.45	170	212	170	212	y	0.0215564	3.77297	up	ENSG00000085733.16
known_NIR_7741	chr11	35204640;35206243	35205785;35208105	+	35204640	35208105	cassetteExon	ENST00000528672.1	known	0.94	73.5	5	30;117	5	y	0.91	73	7	35;111	7	y	0.93	55.5	4	13;98	4	y	0.83	69.5	14	39;100	14	y	0.86	42.5	7	29;56	7	y	0.88	53	7	13;93	7	y	0.021576	-4.11844	down	ENSG00000026508.20
known_NIR_6065	chr10	73125243	73126673	+	73125243;73125509	73125398;73126673	ES	ENST00000544879.5	known	0.35	3	5.5	3	6;5	y	0.44	2	2.5	2	4;1	n	0.25	1	3	1	5;1	n	-	-	-	-	-	-	0.71	6	2.5	6	1;4	n	0.62	9	5.5	9	2;9	y	0.021608	4.48574	up	ENSG00000166321.14
known_NIR_44077	chr6	31114891	31139641	+	31138459	31139641	5pMXE	ENST00000481450.2	known	0.33	4	8	4	8	y	0.2	1	4	1	4	n	0	0	4	0	4	n	0.86	6	1	6	1	n	0.5	6	6	6	6	y	0.79	11	3	11	3	y	0.0216229	3.6952	up	ENSG00000204540.11
known_NIR_20027	chr16	66925194	66925409	-	66925203	66925409	A3SS	ENST00000420652.5	known	0.89	639	75	639	75	y	0.88	732	101	732	101	y	0.88	508	70	508	70	y	0.93	727	53	727	53	y	0.91	742	72	742	72	y	0.91	736	73	736	73	y	0.0217245	4.47214	up	ENSG00000166592.12
known_NIR_1281	chr1	155672731	155676548	-	155672731;155675096	155675010;155676548	ES	ENST00000368339.9	known	0.03	4	122.5	4	108;137	y	0.05	8	157	8	117;197	y	0.03	4	110.5	4	87;134	y	0.01	2	162.5	2	160;165	y	0	0	162	0	126;198	n	0	0	162	0	163;161	n	0.0217245	-4.47214	down	ENSG00000163374.20
known_NIR_23526	chr17	67743586	67743925	+	67743586	67743743	A3SS	ENST00000253247.9	known	0.04	21	500	21	500	y	0.05	26	485	26	485	y	0.05	18	341	18	341	y	0	0	466	0	466	n	0.02	9	406	9	406	y	0.02	10	526	10	526	y	0.0217245	-4.47214	down	ENSG00000130935.10
known_NIR_43937	chr6	3012674	3016884	+	3012674;3015643	3015530;3016884	ES	ENST00000380455.11	known	0.16	62	314.5	62	294;335	y	0.16	65	350	65	349;351	y	0.15	56	309	56	311;307	y	0.11	47	368.5	47	365;372	y	0.13	49	319	49	332;306	y	0.13	47	325	47	280;370	y	0.0217245	-4.47214	down	ENSG00000124588.22
known_NIR_48993	chr8	143616723	143617928	-	143616723	143617428	5pMXE	ENST00000529064.5	known	0	0	7	0	7	n	0.14	1	6	1	6	n	0	0	4	0	4	n	0.33	2	4	2	4	n	0.33	1	2	1	2	n	0.29	4	10	4	10	y	0.0217994	5.5631	up	ENSG00000104522.16
novel_NIR_4133	chr1	246325961	246327201	-	246053069	246327201	A3SS	ENST00000462422.5	novel	0.47	8	9	8	9	y	0.55	12	10	12	10	y	0.77	10	3	10	3	y	0	0	12	0	12	n	0	0	11	0	11	n	0	0	11	0	11	n	0.0218579	-6.65248	down	ENSG00000185420.19
known_NIR_36467	chr3	112991335;112993124	112993026;112996892	+	112991335;112995265	112995135;112996892	MXE	ENST00000383677.7	known	0.57	44.5	33.5	79;10	2;65	y	0.57	52	40	92;12	0;80	n	0.53	24.5	21.5	39;10	0;43	n	0.42	35	48.5	65;5	5;92	y	0.4	23	35	35;11	2;68	y	0.31	23	51.5	46;0	0;103	n	0.0218686	-4.95017	down	ENSG00000163607.17
known_NIR_4964	chr10	100253539;100256476	100256262;100267571	-	100253539;100262063	100260966;100267571	MXE	ENST00000482452.5	known	0.7	40	17.5	80;0	0;35	n	0.72	46	18	92;0	0;36	n	0.68	34	16	67;1	0;32	n	0.84	46.5	9	93;0	0;18	n	0.84	52.5	10	103;2	3;17	y	0.77	53	16	106;0	0;32	n	0.0218733	4.48129	up	ENSG00000095485.18
known_NIR_24732	chr17	8174272;8176026	8175959;8176200	-	8174272	8176200	cassetteExon	ENST00000449985.6	known	0.64	23	13	6;40	13	y	0.56	15	12	0;30	12	n	0.51	11.5	11	2;21	11	y	0.84	30.5	6	9;52	6	y	0.71	29.5	12	6;53	12	y	0.75	36.5	12	0;73	12	n	0.021876	3.64503	up	ENSG00000179029.15
known_NIR_22059	chr17	3648931	3650174	+	3648931	3654998	A3SS	ENST00000673965.1	known	0.13	9	59	9	59	y	0.16	10	51	10	51	y	0.18	11	49	11	49	y	0.11	7	59	7	59	y	0.08	6	68	6	68	y	0.07	4	54	4	54	y	0.0219124	-3.71231	down	ENSG00000040531.16
known_NIR_3397	chr1	32222630;32226320	32226171;32228499	+	32222630	32228499	cassetteExon	ENST00000679290.1	known	0.49	10.5	11	2;19	11	y	0.52	7.5	7	0;15	7	n	0.38	3	5	3;3	5	y	0.31	8.5	19	6;11	19	y	0.13	3.5	24	2;5	24	y	0.17	4	19	2;6	19	y	0.0219895	-3.75713	down	ENSG00000084623.12
known_NIR_27860	chr19	40047473	40048670	-	40047470	40048670	A3SS	ENST00000434248.6	known	0.27	4	11	4	11	y	0.31	5	11	5	11	y	0.17	2	10	2	10	y	0	0	15	0	15	n	0	0	22	0	22	n	0.12	3	23	3	23	y	0.0220777	-3.63731	down	ENSG00000128000.17
novel_NIR_51774	chr5	143057747	143068366	+	143057747	143057858	3pMXE	ENST00000443045.1	novel	0.92	12	1	12	1	y	0.73	11	4	11	4	y	1	11	0	11	0	y	0.4	6	9	6	9	y	0.5	5	5	5	5	y	0.5	2	2	2	2	y	0.0222431	-4.80414	down	ENSG00000145819.18
novel_NIR_24829	chr16	68266721	68273795	+	68266721	68274691	A3SS	ENST00000618043.4	novel	0.12	4	29	4	29	n	0.17	7	34	7	34	y	0.17	3	15	3	15	y	0	0	28	0	28	n	0.08	3	34	3	34	n	0.05	1	18	1	18	n	0.022274	-3.83617	down	ENSG00000103064.15
known_NIR_22938	chr17	49413291	49414740	-	49413291	49414748	A5SS	ENST00000419140.7	known	0.91	31	3	31	3	y	0.87	41	6	41	6	y	0.89	25	3	25	3	y	0.94	29	2	29	2	y	1	29	0	29	0	n	0.98	44	1	44	1	n	0.0222911	3.95285	up	ENSG00000167085.13
known_NIR_14689	chr14	104792722	104794119	-	104792722	104793127	A5SS&ES	ENST00000649815.2	known	0	0	27	0	27	n	0	0	38	0	38	n	0	0	19	0	19	n	0.24	6	19	6	19	y	0.19	5	21	5	21	y	0.14	8	51	8	51	y	0.0223143	6.58179	up	ENSG00000142208.18
known_NIR_35220	chr22	19432859	19433265	+	19432607	19433265	A5SS	ENST00000333130.4	known	0.15	52	293	52	293	y	0.12	52	380	52	380	y	0.16	49	251	49	251	y	0.1	34	295	34	295	y	0.09	32	333	32	333	y	0.07	27	351	27	351	y	0.0223303	-3.80132	down	ENSG00000185608.9
novel_NIR_33105	chr19	36121718	36123450	+	36121718	36124250	A3SS	ENST00000651435.1	novel	0	0	6	0	6	n	0	0	12	0	12	n	0.2	1	4	1	4	n	0.43	3	4	3	4	y	0.33	4	8	4	8	y	0.61	11	7	11	7	y	0.022517	3.69249	up	ENSG00000105254.12
novel_NIR_50523	chr4	76124756	76144390	-	76124756	76148308	A5SS	ENST00000504173.1	novel	-	-	-	-	-	-	1	1	0	1	0	n	1	1	0	1	0	n	0.43	3	4	3	4	y	0.67	2	1	2	1	y	0.5	2	2	2	2	y	0.0225313	-6.54892	down	ENSG00000138750.15
novel_NIR_48568	chr3	9988747	9998776	+	9988747	10002717	A3SS	ENST00000366264.6	novel	0.78	7	2	7	2	y	0.67	4	2	4	2	y	1	8	0	8	0	y	0	0	5	0	5	n	0	0	2	0	2	n	0.43	3	4	3	4	n	0.0225458	-3.89037	down	ENSG00000180385.8
novel_NIR_50487	chr4	74584094	74588332	-	74584094;74585105	74585013;74588332	ES	ENST00000510419.1	novel	0.25	16	49	16	47;51	y	0.12	6	43.5	6	50;37	n	0.17	7	34	7	34;34	y	0.42	20	27.5	20	33;22	y	0.42	11	15	11	15;15	y	0.4	16	24	16	28;20	y	0.0225528	6.06977	up	ENSG00000249942.1
novel_NIR_16213	chr12	6448150;6448737	6448682;6451469	-	6448150;6450980	6450341;6451469	MXE	ENST00000653829.1	novel	0.53	32	28	0;64	2;54	n	0.51	46	43.5	1;91	7;80	n	0.57	40.5	30	0;81	0;60	n	0.48	32.5	35	2;63	2;68	y	0.44	34	43.5	0;68	18;69	n	0.42	35.5	50	0;71	3;97	n	0.0225962	-3.60803	down	ENSG00000215039.7
novel_NIR_50303	chr4	55871958;55872808	55872755;55877917	+	55871958	55877917	cassetteExon	ENST00000381295.7	novel	0.16	1.5	8	3;0	8	n	0.21	5	19	6;4	19	y	0.12	1.5	11	3;0	11	n	0.07	1.5	19	2;1	19	n	0	0	21	0;0	21	n	0.05	1.5	30	3;0	30	n	0.0226432	-3.7	down	ENSG00000090989.18
novel_NIR_5056	chr1	43357900;43358108	43358042;43358419	-	43357900	43358419	cassetteExon	ENST00000424948.1	novel	0.46	15.5	18	12;19	18	y	0.53	20.5	18	33;8	18	y	0.47	14	16	17;11	16	y	0.59	27	19	25;29	19	y	0.62	14.5	9	18;11	9	y	0.56	14	11	14;14	11	y	0.0226896	3.70521	up	ENSG00000234694.1
known_NIR_30358	chr2	152677475	152679352	-	152677475;152679109	152679056;152679352	ES	ENST00000410080.8	known	0	0	13.5	0	12;15	n	0	0	13.5	0	11;16	n	0	0	4	0	4;4	n	0.17	2	9.5	2	9;10	y	0.11	1	8	1	8;8	n	0.19	4	17	4	15;19	y	0.0227402	6.51773	up	ENSG00000196504.19
novel_NIR_46679	chr3	197534153	197546361	-	197538952	197546361	3pMXE	ENST00000468710.1	novel	0.19	3	13	3	13	y	0.17	4	19	4	19	y	0.11	1	8	1	8	n	0	0	15	0	15	n	0	0	11	0	11	n	0	0	15	0	15	n	0.0227402	-6.51773	down	ENSG00000161267.12
known_NIR_39127	chr3	56566740	56566950	+	56566759	56566950	A5SS	ENST00000422222.5	known	0.67	6	3	6	3	n	1	3	0	3	0	n	1	2	0	2	0	n	0.47	7	8	7	8	y	0	0	2	0	2	n	0	0	4	0	4	n	0.0227437	-3.83087	down	ENSG00000180376.17
known_NIR_39129	chr3	56623843	56624479	-	56623566	56624479	A3SS	ENST00000683822.1	known	0.86	65	11	65	11	y	0.84	59	11	59	11	y	0.86	48	8	48	8	y	0.98	84	2	84	2	y	0.92	46	4	46	4	y	0.94	80	5	80	5	y	0.0227763	4.94975	up	ENSG00000163946.14
novel_NIR_18324	chr14	104792722	104795011	-	104792722	104794119	5pMXE	ENST00000554848.5	novel	1	4	0	4	0	y	1	4	0	4	0	y	1	9	0	9	0	y	0.25	2	6	2	6	y	0.29	2	5	2	5	y	0.56	10	8	10	8	y	0.022823	-6.50548	down	ENSG00000142208.18
known_NIR_15308	chr14	24440926	24442346	-	24440926	24441674	A5SS	ENST00000556262.5	known	0.11	23	179	23	179	y	0.09	23	228	23	228	y	0.09	14	146	14	146	y	0.14	36	216	36	216	y	0.14	35	211	35	211	y	0.14	41	249	41	249	y	0.0228602	6.5	up	ENSG00000100445.18
novel_NIR_43847	chr22	38098482	38098985	-	38098482	38108255	A5SS	ENST00000679603.1	novel	0	0	9	0	9	n	0	0	11	0	11	n	0	0	7	0	7	n	0.6	6	4	6	4	y	1	2	0	2	0	y	1	7	0	7	0	n	0.0228602	6.5	up	ENSG00000128298.18
novel_NIR_54173	chr6	118789428	118826147	-	118816294	118826147	3pMXE	ENST00000316316.10	novel	0	0	8	0	8	n	0	0	1	0	1	n	0.4	2	3	2	3	y	-	-	-	-	-	-	1	3	0	3	0	y	1	1	0	1	0	n	0.0228602	6.5	up	ENSG00000111877.18
novel_NIR_56286	chr6	52984605	52985528	-	52984605	52987357	A5SS	ENST00000477599.5	novel	0	0	1	0	1	n	-	-	-	-	-	-	0	0	2	0	2	n	0.6	3	2	3	2	y	1	1	0	1	0	n	1	4	0	4	0	n	0.0228602	6.5	up	ENSG00000170899.11
known_NIR_50447	chr9	128180814	128185547	-	128180799	128185547	A3SS	ENST00000651955.1	known	0.92	200	18	200	18	y	0.9	135	15	135	15	y	0.94	130	9	130	9	y	0.82	171	38	171	38	y	0.86	179	29	179	29	y	0.79	153	41	153	41	y	0.0228796	-4.14286	down	ENSG00000148337.21
known_NIR_52403	chrX	3818500	3822073	-	3818500;3818703	3818657;3822073	ES	ENST00000669937.1	known	0	0	16.5	0	31;2	n	0.05	1	21	1	36;6	n	0	0	12.5	0	24;1	n	0.11	2	16.5	2	30;3	y	0.11	2	17	2	34;0	n	0.09	2	20	2	36;4	y	0.0228876	4.82808	up	ENSG00000285756.2
novel_NIR_21554	chr15	64821281	64822266	-	64821281	64821367	5pMXE	ENST00000558380.1	novel	0.18	5	23	5	23	y	0.12	2	14	2	14	n	0.11	2	16	2	16	n	0.06	1	15	1	15	n	0.04	1	22	1	22	n	0	0	15	0	15	n	0.0229039	-3.67902	down	ENSG00000140451.13
known_NIR_38804	chr3	49962685	49967470	+	49962685	50048245	A3SS	ENST00000442092.5	known	0.33	13	26	13	26	y	0.3	8	19	8	19	y	0.36	8	14	8	14	y	0.52	11	10	11	10	y	0.68	19	9	19	9	y	0.56	9	7	9	7	y	0.0229836	5.02293	up	ENSG00000004534.15
novel_NIR_58278	chr7	139341522	139344897	+	139340619	139344897	A5SS	ENST00000488886.1	novel	1	5	0	5	0	y	-	-	-	-	-	-	1	4	0	4	0	y	-	-	-	-	-	-	0.6	3	2	3	2	y	0.57	4	3	4	3	y	0.0230003	-27.6667	down	ENSG00000164898.13
known_NIR_25367	chr18	21683965	21702316	-	21659343	21702316	A3SS	ENST00000580981.5	known	1	44	0	44	0	n	0.97	60	2	60	2	y	0.97	34	1	34	1	n	0.92	49	4	49	4	y	0.94	51	3	51	3	y	0.94	44	3	44	3	y	0.0230373	-3.8829	down	ENSG00000158201.10
known_NIR_1977	chr1	182818859	182825781	+	182818859;182822199	182822115;182825781	ES	ENST00000488424.5	known	0.2	5	20.5	5	12;29	y	0.32	7	15	7	10;20	y	0.2	2	8	2	10;6	y	0.05	1	20	1	20;20	n	0.04	1	24.5	1	21;28	n	0	0	14	0	14;14	n	0.0230532	-4.90454	down	ENSG00000135838.14
known_NIR_29864	chr19	9621645	9632228	+	9627806	9632228	A5SS&ES	ENST00000652061.1	known	0.29	2	5	2	5	n	0.29	4	10	4	10	y	0.6	9	6	9	6	y	0.9	9	1	9	1	n	1	10	0	10	0	n	0.73	16	6	16	6	y	0.0230958	3.71917	up	ENSG00000267106.8
known_NIR_18207	chr15	99256125	99287257	+	99256125;99276616	99276576;99287257	ES	ENST00000559399.5	known	0.29	15	37.5	15	38;37	y	0.19	11	45.5	11	50;41	y	0.2	8	31.5	8	37;26	y	0.1	4	37	4	32;42	y	0.05	3	53	3	58;48	y	0.06	2	29.5	2	33;26	y	0.0231769	-4.44108	down	ENSG00000168904.15
novel_NIR_47486	chr3	48694525	48694694	-	48694240	48694694	A3SS	ENST00000433104.2	novel	0.25	15	45	15	45	y	0.17	11	53	11	53	y	0.31	16	35	16	35	y	0	0	69	0	69	n	0.05	4	76	4	76	n	0.11	6	47	6	47	n	0.0232168	-3.68702	down	ENSG00000068745.15
known_NIR_27770	chr19	39168302	39169532	+	39168312	39169532	A5SS	ENST00000321944.8	known	0.65	69	37	69	37	y	0.69	94	42	94	42	y	0.63	43	25	43	25	y	0.57	66	49	66	49	y	0.55	71	58	71	58	y	0.6	68	46	68	46	y	0.023236	-3.64662	down	ENSG00000130669.17
known_NIR_13409	chr12	6970068	6970196	-	6966500	6970196	A3SS	ENST00000546111.5	known	0.72	39	15	39	15	y	0.81	29	7	29	7	y	0.75	24	8	24	8	y	0.62	26	16	26	16	y	0.63	33	19	33	19	y	0.6	18	12	18	12	y	0.0232702	-5.13948	down	ENSG00000215021.10
known_NIR_20792	chr16	87708072	87708350	-	87703432	87708350	A3SS	ENST00000567298.5	known	0.68	68	32	68	32	y	0.7	102	44	102	44	y	0.74	70	24	70	24	y	0.82	88	19	88	19	y	0.82	129	29	129	29	y	0.82	114	25	114	25	y	0.0233755	6.4254	up	ENSG00000104731.14
known_NIR_34586	chr20	63203807	63213864	-	63196734	63213864	A3SS	ENST00000370334.4	known	0.93	65	5	65	5	y	0.94	103	6	103	6	y	0.96	64	3	64	3	y	1	83	0	83	0	n	1	87	0	87	0	n	1	62	0	62	0	n	0.0233755	6.4254	up	ENSG00000149658.18
known_NIR_52402	chrX	3818500	3822073	-	3818500	3828506	A5SS	ENST00000475317.5	known	0	0	7	0	7	n	0.06	1	16	1	16	n	0	0	8	0	8	n	0.22	2	7	2	7	n	0.18	2	9	2	9	y	0.11	2	17	2	17	y	0.0234275	3.96203	up	ENSG00000285756.2
known_NIR_38618	chr3	48918998;48922811	48922748;48961612	+	48918998;48927813	48927462;48961612	MXE	ENST00000452882.5	known	0.53	46	40	88;4	5;75	y	0.49	49	51.5	95;3	1;102	n	0.53	31	28	62;0	3;53	n	0.6	54	36	108;0	0;72	n	0.59	49.5	34.5	94;5	0;69	n	0.59	42.5	29.5	85;0	1;58	n	0.023431	5.57832	up	ENSG00000177479.20
known_NIR_43184	chr5	94912976	94923962	-	94912976;94917973	94917896;94923962	ES	ENST00000515393.5	known	0	0	4	0	4;4	n	0.22	2	7	2	7;7	y	0	0	4	0	4;4	n	0.4	4	6	4	4;8	y	0.36	2	3.5	2	3;4	n	0.5	3	3	3	5;1	n	0.0234593	4.11096	up	ENSG00000175471.19
known_NIR_5753	chr10	35195214	35206895	+	35188388	35206895	A5SS	ENST00000495960.5	known	0.53	8	7	8	7	y	0.6	12	8	12	8	y	0.75	12	4	12	4	y	0.33	1	2	1	2	n	0	0	8	0	8	n	0	0	9	0	9	n	0.0234629	-4.04547	down	ENSG00000095794.19
novel_NIR_60788	chr7	75484256	75485971	-	75484256	75485864	A5SS	ENST00000415277.2	novel	0	0	3	0	3	n	0	0	8	0	8	n	-	-	-	-	-	-	0.47	7	8	7	8	y	0.5	3	3	3	3	y	0.29	4	10	4	10	y	0.0235198	6.40494	up	ENSG00000242073.2
known_NIR_2476	chr1	222730177	222732628	+	222730177;222731516	222731357;222732628	ES	ENST00000612948.4	known	0	0	20	0	17;23	n	0	0	17	0	18;16	n	0	0	9.5	0	4;15	n	0.09	2	20.5	2	22;19	y	0.14	3	19	3	27;11	y	0.09	2	20	2	10;30	y	0.0235549	6.4	up	ENSG00000162819.12
known_NIR_29352	chr19	55145565	55146681	-	55145565;55146466	55146434;55146681	ES	ENST00000588981.6	known	0.7	116	49.5	116	50;49	y	0.74	139	48	139	48;48	y	0.69	81	36	81	38;34	y	0.8	156	39	156	40;38	y	0.78	111	32	111	29;35	y	0.78	136	38.5	136	39;38	y	0.0235612	4.6	up	ENSG00000105048.17
novel_NIR_57355	chr7	105780154	105788604	-	105665288	105788604	A3SS	ENST00000419735.8	novel	1	2	0	2	0	y	0.82	9	2	9	2	y	1	2	0	2	0	y	0.62	5	3	5	3	y	0.57	13	10	13	10	y	0.62	8	5	8	5	y	0.0236228	-5.40641	down	ENSG00000146776.15
known_NIR_3592	chr1	35973511	36004341	+	35973511	35982621	3pMXE	ENST00000324350.9	known	1	3	0	3	0	n	0.75	6	2	6	2	n	0.6	6	4	6	4	y	0.2	1	4	1	4	n	0	0	1	0	1	n	0.4	2	3	2	3	n	0.0237236	-3.55371	down	ENSG00000126070.20
novel_NIR_12163	chr11	73808346	73825708	+	73823070	73825708	A5SS&ES	ENST00000508278.6	novel	0.33	1	2	1	2	n	0.43	6	8	6	8	y	0.57	4	3	4	3	y	0	0	16	0	16	n	0	0	4	0	4	n	0	0	13	0	13	n	0.0237727	-6.36954	down	ENSG00000175581.14
known_NIR_23666	chr17	7243951	7244102	-	7243951	7244189	A5SS	ENST00000570828.5	known	0.2	3	12	3	12	y	0.2	3	12	3	12	y	0.12	1	7	1	7	n	0	0	16	0	16	n	0.09	2	20	2	20	y	0	0	23	0	23	n	0.023896	-3.57096	down	ENSG00000175826.12
known_NIR_14616	chr14	103693634	103700655	+	103679518	103700655	A5SS	ENST00000557450.5	known	0.71	20	8	20	8	y	0.71	15	6	15	6	y	0.73	19	7	19	7	y	0.6	26	17	26	17	y	0.5	12	12	12	12	y	0.55	12	10	12	10	y	0.0239165	-5.62544	down	ENSG00000126214.21
novel_NIR_63453	chr8	22024257	22025436	+	22024257;22025306	22025216;22025436	ES	ENST00000522813.5	novel	0.4	2	3	2	2;4	y	0.5	2	2	2	0;4	y	-	-	-	-	-	-	0	0	0.5	0	0;1	n	0.22	1	3.5	1	0;7	n	0	0	4	0	0;8	n	0.0240187	-4.2438	down	ENSG00000158806.14
known_NIR_18502	chr16	19487020;19490568	19490395;19492150	+	19487020;19487326	19487193;19492150	MXE	ENST00000381414.8	known	0.47	61	69.5	5;117	135;4	y	0.55	64	51.5	1;127	102;1	n	0.51	39	38	0;78	76;0	n	0.64	73.5	41	15;132	79;3	y	0.62	73.5	45.5	10;137	91;0	n	0.59	73	50.5	3;143	98;3	y	0.024043	3.90942	up	ENSG00000103534.17
known_NIR_43110	chr5	91303971;91311032	91310856;91313078	-	91303971;91312413	91305680;91313078	MXE	ENST00000513492.6	known	0.15	1	5.5	0;2	5;6	n	0	0	3.5	0;0	5;2	n	0.18	1	4.5	0;2	4;5	n	0.46	3	3.5	0;6	2;5	n	0.31	2	4.5	0;4	7;2	n	0.34	5	9.5	3;7	10;9	y	0.0240854	3.60555	up	ENSG00000248323.7
known_NIR_17187	chr15	60386086	60397871	-	60386086	60390213	A5SS&ES	ENST00000396024.7	known	0.33	41	85	41	85	y	0.29	40	96	40	96	y	0.33	30	62	30	62	y	0.27	29	80	29	80	y	0.22	16	57	16	57	y	0.25	40	119	40	119	y	0.0240973	-3.54965	down	ENSG00000182718.18
known_NIR_3190	chr1	27334281;27334754	27334667;27335379	+	27334281	27335379	cassetteExon	ENST00000611517.4	known	0.05	28.5	504	26;31	504	y	0.05	26.5	504	26;27	504	y	0.06	26.5	407	31;22	407	y	0.03	15	468	10;20	468	y	0.04	20	533	17;23	533	y	0.04	23.5	541	21;26	541	y	0.0241101	-3.53553	down	ENSG00000186501.15
known_NIR_3921	chr1	43365623	43367051	-	43365623	43367486	A5SS	ENST00000621943.4	known	0.02	2	119	2	119	y	0.03	6	197	6	197	y	0.02	4	171	4	171	y	0	0	147	0	147	n	0.01	1	177	1	177	n	0.01	1	141	1	141	n	0.0241101	-3.53553	down	ENSG00000066322.15
known_NIR_4194	chr1	45591270;45600457	45600385;45602255	+	45591270	45602255	cassetteExon	ENST00000437901.6	known	0.04	14	322	10;18	322	y	0.03	12.5	389	18;7	389	y	0.03	6.5	205	4;9	205	y	0.02	6.5	300	8;5	300	y	0.02	5	302	4;6	302	y	0.01	5	341	6;4	341	y	0.0241101	-3.53553	down	ENSG00000132780.17
known_NIR_5907	chr10	5960567	5977405	-	5960567	5963743	A5SS&ES	ENST00000525219.6	known	0.02	6	243	6	243	y	0.02	5	256	5	256	y	0.01	2	204	2	204	y	0.03	9	271	9	271	y	0.04	10	256	10	256	y	0.03	7	223	7	223	y	0.0241101	3.53553	up	ENSG00000134470.21
known_NIR_11183	chr12	12823319	12824540	+	12823319;12824016	12823870;12824540	ES	ENST00000534843.1	known	0.01	4	507	4	532;482	y	0.02	12	610	12	570;650	y	0.02	7	415.5	7	375;456	y	0.04	20	518	20	509;527	y	0.03	17	517	17	532;502	y	0.03	14	543	14	498;588	y	0.0241101	3.53553	up	ENSG00000178878.13
known_NIR_17124	chr15	60361054;60386086	60386028;60397943	-	60361054;60397338	60364429;60397943	MXE	ENST00000558998.5	known	0.12	1102	7860	0;2204	15328;392	n	0.13	1229.5	8378	4;2455	16336;420	y	0.12	896.5	6795	0;1793	13295;295	n	0.11	1054.5	8172	0;2109	15973;371	n	0.1	1029	8815.5	3;2055	17201;430	y	0.11	1122.5	8825.5	3;2242	17214;437	y	0.0241101	-3.53553	down	ENSG00000182718.18
known_NIR_18440	chr16	1783036;1784066	1783877;1786537	+	1783036	1786537	cassetteExon	ENST00000566447.5	known	0.04	7.5	202	2;13	202	y	0.03	7	194	5;9	194	y	0.03	4.5	171	2;7	171	y	0.01	2	209	0;4	209	n	0.02	5	255	0;10	255	n	0.02	4.5	227	2;7	227	y	0.0241101	-3.53553	down	ENSG00000095906.17
known_NIR_18774	chr16	25170805	25178001	+	25175034	25178001	A5SS&ES	ENST00000572869.1	known	0.04	12	321	12	321	y	0.03	9	291	9	291	y	0.03	10	291	10	291	y	0.02	8	361	8	361	y	0.02	6	344	6	344	y	0.01	4	338	4	338	y	0.0241101	-3.53553	down	ENSG00000205629.12
known_NIR_32742	chr2	74458671;74459117	74458832;74459643	+	74458671	74459643	cassetteExon	ENST00000233615.7	known	0.02	3	165	6;0	165	n	0.03	5	150	1;9	150	n	0.02	2.5	112	3;2	112	y	0	0.5	142	1;0	142	n	0.01	1	116	2;0	116	n	0.01	2.5	208	1;4	208	n	0.0241101	-3.53553	down	ENSG00000239779.7
known_NIR_40844	chr4	82359639	82373446	-	82359639;82371584	82371528;82373446	ES	ENST00000313899.12	known	0.12	148	1090.5	148	1288;893	y	0.12	171	1220	171	1409;1031	y	0.11	96	779	96	893;665	y	0.13	146	1018	146	1218;818	y	0.14	161	981.5	161	1167;796	y	0.13	168	1164	168	1353;975	y	0.0241101	3.53553	up	ENSG00000138668.19
known_NIR_43285	chr6	10749268	10755142	+	10749268;10751234	10751133;10755142	ES	ENST00000612333.4	known	0	2	419	2	2;836	y	0.01	4	410.5	4	0;821	n	0.01	4	330	4	0;660	n	0.03	11	390.5	11	0;781	n	0.02	9	386.5	9	2;771	y	0.02	6	371	6	0;742	n	0.0241101	3.53553	up	ENSG00000137210.14
known_NIR_4186	chr1	45591270	45602255	+	45591270	45594694	3pMXE	ENST00000629893.1	known	0.98	322	7	322	7	y	0.98	389	6	389	6	y	0.97	205	6	205	6	y	0.99	300	3	300	3	y	0.99	302	2	302	2	y	1	341	0	341	0	n	0.0241101	3.53553	up	ENSG00000132780.17
known_NIR_6766	chr11	119018970;119019317	119019143;119021760	+	119018970	119021760	cassetteExon	ENST00000525303.5	known	0.99	335	5	629;41	5	y	0.99	300	4	559;41	4	y	1	214	1	397;31	1	n	0.98	281	6	513;49	6	y	0.97	295.5	9	528;63	9	y	0.98	334.5	8	623;46	8	y	0.0241101	-3.53553	down	ENSG00000196655.12
known_NIR_18836	chr16	2769284	2770352	+	2769284	2769862	3pMXE	ENST00000574593.1	known	0.96	580	23	580	23	y	0.97	587	18	587	18	y	0.97	430	15	430	15	y	0.98	571	13	571	13	y	0.98	546	10	546	10	y	0.99	616	9	616	9	y	0.0241101	3.53553	up	ENSG00000167978.17
known_NIR_25530	chr18	35478349	35479300	-	35478349	35497719	A5SS	ENST00000587450.1	known	0.96	346	14	346	14	y	0.95	325	18	325	18	y	0.96	333	13	333	13	y	0.97	373	10	373	10	y	0.98	374	8	374	8	y	0.97	407	11	407	11	y	0.0241101	3.53553	up	ENSG00000153391.16
known_NIR_44468	chr6	34236963;34237317	34237204;34240737	+	34236963	34240737	cassetteExon	ENST00000347617.10	known	0.88	3702.5	514	2197;5208	514	y	0.87	4039.5	597	2428;5651	597	y	0.88	3212.5	445	1950;4475	445	y	0.89	3658	451	2213;5103	451	y	0.9	4181.5	490	2409;5954	490	y	0.89	3880	485	2308;5452	485	y	0.0241101	3.53553	up	ENSG00000137309.20
known_NIR_47785	chr7	97117897	97181012	+	97117897	97142673	3pMXE	ENST00000489852.1	known	0.97	306	10	306	10	y	0.97	317	9	317	9	y	0.96	199	9	199	9	y	0.98	255	4	255	4	y	0.99	252	3	252	3	y	0.98	367	8	367	8	y	0.0241101	3.53553	up	ENSG00000196636.8
known_NIR_52099	chrX	154012678;154013343	154013043;154014042	-	154012678	154014042	cassetteExon	ENST00000455690.5	known	0.98	844	20	1555;133	20	y	0.98	904.5	19	1714;95	19	y	0.99	731	9	1356;106	9	y	0.97	816.5	22	1502;131	22	y	0.97	984.5	32	1785;184	32	y	0.96	871	32	1626;116	32	y	0.0241101	-3.53553	down	ENSG00000184216.14
known_NIR_52748	chrX	56732199	56817320	+	56732199;56811179	56811020;56817320	ES	ENST00000637096.1	known	0.97	474	17	474	11;23	y	0.97	447	11.5	447	13;10	y	0.96	319	12.5	319	14;11	y	0.98	461	9.5	461	8;11	y	0.99	445	5.5	445	0;11	n	0.98	475	8.5	475	9;8	y	0.0241101	3.53553	up	ENSG00000204272.13
known_NIR_44531	chr6	36598983	36601152	+	36598983	36599821	3pMXE	ENST00000613941.4	known	0.94	2144	130	2144	130	y	0.94	2155	136	2155	136	y	0.95	1277	61	1277	61	y	0.92	1703	141	1703	141	y	0.93	1724	123	1724	123	y	0.93	1859	132	1859	132	y	0.0241101	-3.53553	down	ENSG00000112081.17
known_NIR_33190	chr20	17970370	17988166	+	17970370;17975903	17975684;17988166	ES	ENST00000377710.10	known	0.09	14	143.5	14	108;179	y	0.09	14	135	14	123;147	y	0.1	10	87.5	10	66;109	y	0.06	11	167.5	11	147;188	y	0.03	4	125.5	4	95;156	y	0.03	6	167	6	160;174	y	0.0241143	-5.05964	down	ENSG00000125871.14
known_NIR_36310	chr22	50529754	50529904	-	50527717	50529904	A3SS	ENST00000651401.1	known	0.05	12	209	12	209	y	0.05	12	248	12	248	y	0.02	3	141	3	141	y	0.09	23	223	23	223	y	0.1	22	194	22	194	y	0.09	24	253	24	253	y	0.0241143	5.05964	up	ENSG00000025708.14
known_NIR_28128	chr19	4179286	4182474	-	4180909	4182474	3pMXE	ENST00000594341.1	known	0.02	3	173	3	173	y	0.04	7	183	7	183	y	0.07	12	167	12	167	y	0.1	19	180	19	180	y	0.1	20	185	20	185	y	0.13	24	165	24	165	y	0.0241464	3.77964	up	ENSG00000077463.15
known_NIR_34887	chr21	39345274;39347292	39347247;39348292	-	39345274;39347478	39345830;39348292	MXE	ENST00000431390.5	known	0.17	13.5	67.5	21;6	130;5	y	0.14	11.5	68.5	21;2	119;18	y	0.21	10.5	40.5	20;1	75;6	n	0.11	8.5	69	16;1	127;11	n	0.06	4	63.5	7;1	114;13	n	0.07	6	81.5	8;4	151;12	y	0.0241658	-3.67658	down	ENSG00000205581.11
known_NIR_4380	chr1	53245981	53246924	-	53245981	53246956	A5SS	ENST00000653810.1	known	1	7	0	7	0	n	0.69	9	4	9	4	y	1	11	0	11	0	n	0.25	2	6	2	6	n	0.5	4	4	4	4	n	0.5	4	4	4	4	n	0.024182	-3.61585	down	ENSG00000157193.18
known_NIR_8388	chr11	61430182;61438113	61437625;61445941	+	61430182	61445941	cassetteExon	ENST00000542074.1	known	0.96	264	12	192;336	12	y	0.97	311	11	216;406	11	y	0.96	251	10	185;317	10	y	0.88	272.5	36	224;321	36	y	0.89	307.5	38	210;405	38	y	0.92	357.5	31	279;436	31	y	0.0242374	-5.34522	down	ENSG00000167985.7
known_NIR_6437	chr10	97445606	97445732	-	97441259	97445732	A3SS	ENST00000370885.8	known	0.47	9	10	9	10	y	0.42	10	14	10	14	y	0.62	8	5	8	5	y	0.84	27	5	27	5	y	0.79	15	4	15	4	y	0.71	12	5	12	5	y	0.0242558	3.89538	up	ENSG00000171311.13
novel_NIR_22111	chr15	78590104	78593092	+	78590098	78593092	A5SS	ENST00000394802.4	novel	0.67	18	9	18	9	y	0.91	29	3	29	3	y	0.61	11	7	11	7	y	0.29	7	17	7	17	y	0.18	2	9	2	9	y	0.44	11	14	11	14	y	0.0243011	-3.59602	down	ENSG00000169684.13
known_NIR_44787	chr6	689212	693019	-	637861	693019	A3SS	ENST00000230449.9	known	0.36	5	9	5	9	y	0.62	8	5	8	5	y	0.38	3	5	3	5	n	0.2	1	4	1	4	n	0	0	4	0	4	n	0	0	5	0	5	n	0.0243083	-3.61794	down	ENSG00000112685.14
known_NIR_50457	chr9	128239779	128240427	+	128239779	128239985	A3SS&ES	ENST00000475805.5	known	0.05	3	61	3	61	y	0.09	5	52	5	52	y	0.1	4	35	4	35	y	0	0	73	0	73	n	0.03	2	63	2	63	y	0	0	64	0	64	n	0.0243691	-3.83406	down	ENSG00000106976.21
known_NIR_28351	chr19	44891314	44891410	+	44891314	44891407	A3SS	ENST00000405636.6	known	0.15	56	310	56	310	y	0.13	44	282	44	282	y	0.17	45	221	45	221	y	0.09	29	299	29	299	y	0.09	34	336	34	336	y	0.08	29	317	29	317	y	0.02439	-5.26965	down	ENSG00000130204.13
novel_NIR_12924	chr12	10610680	10612946	-	10610680	10613541	A5SS	ENST00000539554.5	novel	0.27	3	8	3	8	n	0	0	13	0	13	n	0	0	9	0	9	n	1	4	0	4	0	y	0.91	10	1	10	1	y	0.5	2	2	2	2	y	0.0244283	4.00157	up	ENSG00000111196.10
known_NIR_40110	chr4	182915575	182915881	-	182915575	182917311	A5SS	ENST00000438320.7	known	0.16	4	21	4	21	y	0.18	7	31	7	31	y	0.21	10	38	10	38	y	0.1	4	35	4	35	y	0.04	1	23	1	23	n	0.11	3	24	3	24	y	0.0244287	-3.81	down	ENSG00000129187.15
known_NIR_13436	chr12	70332846	70335438	+	70319364	70335438	A5SS	ENST00000548863.1	known	0.7	35	15	35	15	y	0.65	41	22	41	22	y	0.61	11	7	11	7	y	0.78	52	15	52	15	y	0.75	39	13	39	13	y	0.85	23	4	23	4	y	0.0244629	3.54965	up	ENSG00000111596.14
known_NIR_52279	chrX	155064033	155064937	-	155064033	155070694	A5SS	ENST00000369484.8	known	0.11	23	185	23	185	y	0.15	29	159	29	159	y	0.13	20	137	20	137	y	0.17	38	180	38	180	y	0.22	41	145	41	145	y	0.21	50	193	50	193	y	0.0245225	3.65563	up	ENSG00000182712.16
known_NIR_34888	chr21	39345274;39347292	39347247;39348292	-	39345274;39347478	39347379;39348292	MXE	ENST00000419378.5	known	0.3	13.5	31.5	21;6	58;5	y	0.31	11.5	26	21;2	34;18	y	0.37	10.5	18	20;1	30;6	n	0.24	8.5	27.5	16;1	44;11	n	0.17	4	20	7;1	27;13	n	0.13	6	41.5	8;4	71;12	y	0.0245664	-3.77297	down	ENSG00000205581.11
novel_NIR_35533	chr19	58548776	58548901	+	58548776	58548886	A3SS	ENST00000597136.1	novel	0	0	6	0	6	n	0	0	9	0	9	n	-	-	-	-	-	-	0.22	2	7	2	7	y	0.14	1	6	1	6	n	0.14	1	6	1	6	n	0.0246571	6.25	up	ENSG00000130726.12
known_NIR_47216	chr7	64526517	64543707	-	64522500	64543707	A3SS	ENST00000309683.11	known	0.62	8	5	8	5	y	0.67	2	1	2	1	n	-	-	-	-	-	-	0	0	3	0	3	n	0	0	4	0	4	n	-	-	-	-	-	-	0.0246628	-25.8	down	ENSG00000173041.12
known_NIR_3322	chr1	30953981	30965982	-	30953981;30964910	30964674;30965982	ES	ENST00000424085.6	known	0.21	4	15	4	8;22	y	0.39	10	15.5	10	16;15	y	0.31	4	9	4	6;12	y	0.15	2	11	2	6;16	y	0	0	8	0	7;9	n	0	0	20.5	0	11;30	n	0.0247525	-3.50935	down	ENSG00000134644.16
novel_NIR_59762	chr7	43656153	43729429	-	43650712	43729429	A3SS	ENST00000446564.5	novel	0.48	72	77	72	77	y	0.53	114	103	114	103	n	0.51	62	60	62	60	y	0.56	80	62	80	62	y	0.57	90	68	90	68	y	0.59	108	75	108	75	n	0.0247822	3.92232	up	ENSG00000106603.20
known_NIR_51764	chrX	120431462	120441730	-	120439293	120441730	3pMXE	ENST00000371335.4	known	0.8	376	96	376	96	y	0.81	339	78	339	78	y	0.82	259	57	259	57	y	0.78	316	89	316	89	y	0.78	358	103	358	103	y	0.79	337	87	337	87	y	0.0248175	-4	down	ENSG00000005893.16
known_NIR_6456	chr10	97459282;97459526	97459362;97459659	-	97459282	97459659	cassetteExon	ENST00000444411.5	known	1	444	2	523;365	2	y	0.99	398.5	3	464;333	3	y	0.98	337	8	358;316	8	y	0.97	388	11	455;321	11	y	0.96	359	14	457;261	14	y	0.96	380.5	14	454;307	14	y	0.0248175	-4	down	ENSG00000155229.21
known_NIR_50761	chr9	133031164;133043926	133043728;133050783	+	133031164	133050783	cassetteExon	ENST00000372099.10	known	0.99	109	1	0;218	1	n	1	121	0	0;242	0	n	1	132.5	0	0;265	0	n	0.97	123	4	4;242	4	y	0.96	162.5	6	0;325	6	n	0.98	162.5	3	0;325	3	n	0.0248175	-4	down	ENSG00000148308.18
known_NIR_10177	chr12	103954968	103956631	-	103951630	103956631	A3SS	ENST00000378090.9	known	0.02	2	131	2	131	y	0.01	1	139	1	139	n	0.03	3	110	3	110	y	0.05	6	112	6	112	y	0.04	6	132	6	132	y	0.05	8	144	8	144	y	0.0248175	4	up	ENSG00000204954.10
known_NIR_12882	chr12	57230244	57230803	+	57229811	57230803	A5SS	ENST00000556825.5	known	0.02	11	533	11	533	y	0.03	20	632	20	632	y	0.02	13	512	13	512	y	0.05	28	528	28	528	y	0.04	24	565	24	565	y	0.06	35	554	35	554	y	0.0248175	4	up	ENSG00000182199.11
known_NIR_13075	chr12	6355880	6362068	-	6355880	6362051	A5SS	ENST00000360168.7	known	0	2	523	2	523	y	0.01	6	531	6	531	y	0	2	506	2	506	y	0.02	11	521	11	521	y	0.03	20	611	20	611	y	0.04	28	595	28	595	y	0.0248175	4	up	ENSG00000111319.13
known_NIR_15216	chr14	24183161	24183250	-	24183169	24183250	A3SS	ENST00000354464.11	known	0.01	3	388	3	388	y	0	0	422	0	422	n	0	0	329	0	329	n	0.04	14	303	14	303	y	0.02	6	385	6	385	y	0.03	10	361	10	361	y	0.0248175	4	up	ENSG00000196497.17
known_NIR_24672	chr17	81682149;81682675	81682443;81683013	-	81682149	81683013	cassetteExon	ENST00000622299.5	known	0.11	31	240	1;61	240	n	0.12	39.5	293	13;66	293	y	0.12	34.5	249	0;69	249	n	0.08	24.5	292	1;48	292	n	0.09	31.5	307	0;63	307	n	0.1	36.5	337	3;70	337	y	0.0248175	-4	down	ENSG00000214087.9
known_NIR_29118	chr19	49995275	50000790	-	49997570	50000790	3pMXE	ENST00000601849.1	known	0.07	13	163	13	163	y	0.06	10	167	10	167	y	0.07	12	151	12	151	y	0.03	6	169	6	169	y	0.05	9	161	9	161	y	0.04	9	197	9	197	y	0.0248175	-4	down	ENSG00000105053.11
known_NIR_31944	chr2	27368113	27368372	-	27368139	27368372	A3SS	ENST00000347454.9	known	0.02	5	211	5	211	y	0.01	2	276	2	276	y	0.01	2	193	2	193	y	0.05	10	200	10	200	y	0.04	9	231	9	231	y	0.03	8	260	8	260	y	0.0248175	4	up	ENSG00000115211.16
known_NIR_36826	chr3	128481902	128483860	-	128481944	128483860	A3SS	ENST00000341105.7	known	0.04	6	157	6	157	y	0.04	4	101	4	101	y	0.03	3	100	3	100	y	0	0	164	0	164	n	0.01	1	169	1	169	n	0.02	2	96	2	96	y	0.0248175	-4	down	ENSG00000179348.12
known_NIR_50930	chr9	137189151	137189807	+	137189265	137189807	A5SS	ENST00000459860.1	known	0.03	44	1218	44	1218	y	0.02	26	1180	26	1180	y	0.04	41	1053	41	1053	y	0.06	69	1153	69	1153	y	0.05	66	1323	66	1323	y	0.06	78	1308	78	1308	y	0.0248175	4	up	ENSG00000176101.12
known_NIR_51160	chr9	34220948	34241185	+	34220948;34234340	34234216;34241185	ES	ENST00000379186.8	known	0.12	8	58.5	8	45;72	y	0.06	4	63	4	53;73	y	0.09	4	39	4	40;38	y	0.03	2	55.5	2	43;68	y	0	0	78	0	50;106	n	0	0	72.5	0	42;103	n	0.0248175	-4	down	ENSG00000165006.14
known_NIR_24959	chr17	8206639	8207318	-	8206639;8206934	8206750;8207318	ES	ENST00000578549.5	known	0.06	17	282	17	549;15	y	0.07	23	286	23	537;35	y	0.08	24	267.5	24	516;19	y	0.09	25	252.5	25	456;49	y	0.1	33	288	33	531;45	y	0.1	34	312.5	34	575;50	y	0.0248175	4	up	ENSG00000178999.13
known_NIR_7726	chr11	35198246	35214852	+	35189972	35214852	A5SS	ENST00000279452.10	known	0.89	16	2	16	2	y	0.79	27	7	27	7	y	0.71	22	9	22	9	y	0.49	18	19	18	19	y	0.58	15	11	15	11	y	0.61	20	13	20	13	y	0.0248259	-3.73684	down	ENSG00000026508.20
known_NIR_42609	chr5	41934308	41941192	+	41934308;41939616	41939441;41941192	ES	ENST00000281623.8	known	0	0	62	0	62;62	n	0.03	2	68	2	59;77	y	0	0	59	0	51;67	n	0.06	3	47	3	50;44	y	0.11	9	72.5	9	79;66	y	0.12	8	60.5	8	60;61	y	0.0249171	4.11096	up	ENSG00000151876.13
known_NIR_21232	chr16	90027722	90031190	+	90027722	90031176	A3SS	ENST00000563980.5	known	0.4	4	6	4	6	y	0.33	5	10	5	10	y	0	0	1	0	1	n	0.89	17	2	17	2	y	0.64	7	4	7	4	y	0.88	14	2	14	2	y	0.024984	3.78509	up	ENSG00000141013.17
known_NIR_42943	chr5	7868196	7868979	-	7865983	7868979	A3SS	ENST00000513658.5	known	0	0	12	0	12	n	0	0	28	0	28	n	0	0	16	0	16	n	0.12	2	14	2	14	y	0.2	3	12	3	12	y	0.21	3	11	3	11	y	0.0250168	6.20318	up	ENSG00000124279.12
novel_NIR_26732	chr17	28657846	28661726	-	28661220	28661726	3pMXE	ENST00000585428.1	novel	0	0	7	0	7	n	0	0	2	0	2	n	0	0	4	0	4	n	0.2	3	12	3	12	y	0.21	3	11	3	11	y	0.12	1	7	1	7	n	0.0250168	6.20318	up	ENSG00000132581.10
novel_NIR_60300	chr7	6413034	6416841	-	6413034;6416754	6416259;6416841	ES	ENST00000454738.5	novel	0.17	12	58.5	12	0;117	y	0.1	6	52	6	1;103	n	0.12	7	52.5	7	10;95	n	0	0	64.5	0	0;129	n	0.06	4	59.5	4	2;117	n	0.04	3	69.5	3	0;139	n	0.0250282	-3.54291	down	ENSG00000164535.15
known_NIR_2208	chr1	204073711	204114321	+	204113134	204114321	5pMXE	ENST00000618875.4	known	0	0	22	0	22	n	0	0	37	0	37	n	0	0	34	0	34	n	0.12	5	37	5	37	y	0.12	6	42	6	42	y	0.07	2	25	2	25	y	0.0250415	6.2	up	ENSG00000143842.15
novel_NIR_59582	chr7	32988652	32991222	+	32988652	32992722	A3SS	ENST00000489038.5	novel	0	0	25	0	25	n	0	0	11	0	11	n	0	0	7	0	7	n	0.2	3	12	3	12	y	0.22	2	7	2	7	y	0.33	5	10	5	10	y	0.0251516	6.1859	up	ENSG00000122642.11
known_NIR_38937	chr3	51942708	51943354	+	51942708	51943349	A3SS	ENST00000431474.6	known	0	0	3	0	3	n	0.45	5	6	5	6	y	0.29	2	5	2	5	n	0.86	6	1	6	1	n	1	12	0	12	0	n	0.67	8	4	8	4	y	0.0251539	3.66606	up	ENSG00000041880.15
known_NIR_18121	chr15	90912279	90912517	+	90912279	90912542	A3SS	ENST00000560451.5	known	0	0	11	0	11	n	0	0	22	0	22	n	0	0	16	0	16	n	0.25	4	12	4	12	y	0.2	5	20	5	20	y	0.14	2	12	2	12	y	0.0251595	6.18488	up	ENSG00000196547.15
novel_NIR_19364	chr14	57391728	57393798	+	57391728	57396752	A3SS	ENST00000556492.6	novel	0.2	2	8	2	8	y	0.25	2	6	2	6	y	0.14	2	12	2	12	n	0	0	17	0	17	n	0	0	10	0	10	n	0	0	10	0	10	n	0.0251595	-6.18488	down	ENSG00000139977.14
known_NIR_49193	chr8	144837507	144841819	+	144837507	144845979	A3SS	ENST00000525266.5	known	0	0	2	0	2	n	0.33	3	6	3	6	n	0	0	1	0	1	n	0.67	4	2	4	2	n	1	6	0	6	0	n	0.54	7	6	7	6	y	0.0252568	3.56819	up	ENSG00000147789.16
known_NIR_6222	chr10	79804527;79808963	79808759;79814613	-	79804527;79806122	79806039;79814613	MXE	ENST00000483080.6	known	0.08	5	58	0;10	100;16	n	0.08	4.5	49.5	0;9	98;1	n	0.1	6.5	57.5	2;11	111;4	y	0.03	2	62	0;4	116;8	n	0.06	4	60	0;8	114;6	n	0.05	3	61	0;6	112;10	n	0.0253033	-3.61814	down	ENSG00000225484.7
known_NIR_31713	chr2	241500796	241508006	-	241500796	241501478	A5SS&ES	ENST00000543554.5	known	0.03	8	243	8	243	y	0.05	20	350	20	350	y	0.03	10	278	10	278	y	0.06	17	269	17	269	y	0.09	29	302	29	302	y	0.08	23	249	23	249	y	0.0253033	3.61814	up	ENSG00000115694.15
known_NIR_39558	chr4	102826636	102868715	-	102826636	102827427	5pMXE	ENST00000453744.7	known	0.02	9	377	9	377	y	0.05	18	320	18	320	y	0.04	9	241	9	241	y	0.07	27	334	27	334	y	0.09	28	273	28	273	y	0.07	24	323	24	323	y	0.0253033	3.61814	up	ENSG00000109332.20
novel_NIR_53958	chr6	10723241;10724633	10724576;10725907	+	10723241	10725907	cassetteExon	ENST00000466421.5	novel	0	0	8	0;0	8	n	0	0	2	0;0	2	n	0.43	1.5	2	3;0	2	n	0.75	3	1	4;2	1	y	0.63	8.5	5	15;2	5	y	1	2.5	0	5;0	0	n	0.0253622	3.60987	up	ENSG00000111843.14
known_NIR_32834	chr2	85377474;85387225	85387098;85389751	+	85377474	85389751	cassetteExon	ENST00000490508.5	known	0.27	11	30	11;11	30	y	0.36	12.5	22	6;19	22	y	0.3	11	26	13;9	26	y	0.12	7	51	5;9	51	y	0.21	6.5	24	7;6	24	y	0.08	4.5	52	5;4	52	y	0.0254235	-3.71429	down	ENSG00000115459.18
known_NIR_43955	chr6	30296237;30314482	30314269;30326354	-	30296237	30326354	cassetteExon	ENST00000665953.1	known	0.55	11	9	17;5	9	y	0.43	12	16	9;15	16	y	0.51	10.5	10	6;15	10	y	0.3	10	23	7;13	23	y	0.3	8	19	8;8	19	y	0.28	5	13	7;3	13	y	0.02543	-5.66371	down	ENSG00000231074.9
known_NIR_35235	chr22	19516645	19516814	+	19516645	19516817	A3SS	ENST00000407835.6	known	0.07	21	287	21	287	y	0.09	28	284	28	284	y	0.1	27	248	27	248	y	0.06	20	298	20	298	y	0.04	16	356	16	356	y	0.03	7	265	7	265	y	0.0254815	-3.4744	down	ENSG00000093009.11
novel_NIR_51509	chr5	139123812	139127739	-	139121170	139127739	A3SS	ENST00000509534.5	novel	0.45	5	6	5	6	y	0.25	2	6	2	6	y	0.32	6	13	6	13	y	0	0	12	0	12	n	0	0	11	0	11	n	0.17	4	19	4	19	y	0.0254923	-3.47591	down	ENSG00000120725.13
known_NIR_24398	chr17	78216066	78216664	+	78216034	78216664	A5SS	ENST00000301633.8	known	0.07	6	75	6	75	y	0.07	7	88	7	88	y	0.04	3	80	3	80	y	0.01	1	68	1	68	n	0.03	4	122	4	122	y	0	0	112	0	112	n	0.0255316	-3.5	down	ENSG00000089685.15
novel_NIR_45379	chr3	131029878	131035673	+	131029878	131080423	A3SS	ENST00000510769.5	novel	0.67	4	2	4	2	y	0.6	6	4	6	4	y	1	2	0	2	0	y	-	-	-	-	-	-	0	0	1	0	1	n	0	0	3	0	3	n	0.0255536	-6.13514	down	ENSG00000114670.14
known_NIR_43005	chr5	86619442	86620668	+	86619878	86620668	A5SS&ES	ENST00000505430.5	known	0.32	6	13	6	13	y	0.64	7	4	7	4	y	0.44	4	5	4	5	n	0.83	10	2	10	2	y	0.85	11	2	11	2	y	1	17	0	17	0	n	0.0255836	3.9634	up	ENSG00000127184.13
known_NIR_8399	chr11	61438342	61445941	+	61430182	61445941	A5SS	ENST00000542074.1	known	0.37	7	12	7	12	y	0.42	8	11	8	11	y	0.6	15	10	15	10	y	0.23	11	36	11	36	y	0.12	5	38	5	38	y	0.09	3	31	3	31	y	0.0255925	-3.87191	down	ENSG00000167985.7
known_NIR_50630	chr9	129503139	129503323	+	129489299	129503323	A5SS	ENST00000653047.1	known	0.73	36	13	36	13	y	0.65	28	15	28	15	y	0.66	21	11	21	11	y	0.59	20	14	20	14	y	0.55	17	14	17	14	y	0.55	16	13	16	13	y	0.0256379	-4.09644	down	ENSG00000204054.14
known_NIR_63	chr1	101075716	101077363	+	101075394	101077363	A5SS	ENST00000453011.5	known	0.92	36	3	36	3	y	0.98	41	1	41	1	n	0.93	39	3	39	3	y	0.88	28	4	28	4	y	0.81	47	11	47	11	y	0.8	40	10	40	10	y	0.0256866	-3.62441	down	ENSG00000233184.7
known_NIR_20780	chr16	86554748	86555169	-	86554751	86555169	A3SS	ENST00000360900.11	known	0	0	10	0	10	n	0.3	3	7	3	7	y	0.31	4	9	4	9	y	0.8	12	3	12	3	y	0.6	15	10	15	10	y	0.58	7	5	7	5	y	0.0257403	3.69462	up	ENSG00000103248.19
novel_NIR_37904	chr2	232130719	232163459	+	232130719;232136719	232136472;232163459	ES	ENST00000273009.10	novel	0.09	2	20	2	19;21	n	0.15	4	22	4	23;21	y	0.1	1	9	1	12;6	n	0	0	20	0	8;32	n	0	0	18.5	0	16;21	n	0	0	14.5	0	9;20	n	0.025784	-6.10658	down	ENSG00000144535.20
known_NIR_42038	chr5	173608292	173616200	-	173608292;173613255	173613131;173616200	ES	ENST00000285908.5	known	0	0	78	0	2;154	n	0	0	80	0	4;156	n	0.04	2	52	2	3;101	y	0.11	8	62.5	8	2;123	y	0.06	5	73.5	5	9;138	y	0.12	11	77	11	26;128	y	0.0257989	3.64662	up	ENSG00000145919.11
known_NIR_47202	chr7	6013140	6015146	+	6015052	6015146	A5SS&ES	ENST00000400479.6	known	0	0	23	0	23	n	0	0	15	0	15	n	0	0	7	0	7	n	0.09	3	30	3	30	y	0.05	1	18	1	18	n	0.08	2	22	2	22	y	0.0258236	6.1017	up	ENSG00000106305.10
known_NIR_39789	chr4	128062219	128074460	+	128061401	128074460	A5SS	ENST00000512292.5	known	1	4	0	4	0	n	1	8	0	8	0	n	1	11	0	11	0	n	0.25	2	6	2	6	n	0.55	6	5	6	5	y	0.2	1	4	1	4	n	0.025838	-6.09994	down	ENSG00000138709.19
novel_NIR_21905	chr15	74458896	74460825	-	74458896	74460668	A5SS	ENST00000567435.5	novel	0.15	6	34	6	34	y	0.09	2	20	2	20	n	0.16	5	27	5	27	y	0	0	32	0	32	n	0	0	25	0	25	n	0	0	14	0	14	n	0.025838	-6.09994	down	ENSG00000138629.16
novel_NIR_40552	chr20	28600461	28600591	-	28600461	28601603	A5SS	ENST00000650751.1	novel	0.86	6	1	6	1	y	1	3	0	3	0	y	0.71	5	2	5	2	n	0.56	5	4	5	4	y	0.5	8	8	8	8	n	0.38	3	5	3	5	y	0.0258983	-3.80275	down	ENSG00000282826.2
known_NIR_13195	chr12	6602175	6602376	-	6602154	6602376	A3SS	ENST00000644480.2	known	0.66	53	27	53	27	y	0.54	55	46	55	46	y	0.59	34	24	34	24	y	0.48	31	33	31	33	y	0.45	29	35	29	35	y	0.39	20	31	20	31	y	0.0259311	-3.58372	down	ENSG00000285238.2
known_NIR_52429	chrX	3818703;3822580	3822374;3828506	-	3818703	3828506	cassetteExon	ENST00000483854.6	known	0.73	11	4	20;2	4	y	0.95	18	1	26;10	1	n	0.82	9	2	13;5	2	y	0.62	8	5	13;3	5	y	0.48	13	14	14;12	14	y	0.54	10.5	9	15;6	9	y	0.0260216	-3.78961	down	ENSG00000285756.2
known_NIR_7637	chr11	3373656;3377900	3377617;3379038	-	3373656	3379038	cassetteExon	ENST00000620374.4	known	0.38	3	5	2;4	5	y	0.36	4	7	6;2	7	y	0.2	1	4	2;0	4	n	0.05	1	19	0;2	19	n	0.11	1	8	0;2	8	n	0	0	19	0;0	19	n	0.0260303	-3.98561	down	ENSG00000005801.18
novel_NIR_59749	chr7	43648652	43650616	-	43648652	43729429	A5SS	ENST00000415076.6	novel	0.08	8	97	8	97	n	0.04	4	101	4	101	n	0.08	9	108	9	108	n	0.15	16	88	16	88	y	0.13	17	109	17	109	n	0.2	28	111	28	111	y	0.0260649	3.77552	up	ENSG00000106603.20
novel_NIR_64402	chr8	73964629	73972077	-	73969673	73972077	A3SS&ES	ENST00000522337.5	novel	0.43	3	4	3	4	y	0.25	2	6	2	6	n	0.33	3	6	3	6	n	0	0	13	0	13	n	0.18	2	9	2	9	n	0	0	9	0	9	n	0.0261065	-3.4826	down	ENSG00000154582.17
known_NIR_4324	chr1	52854630	52860731	+	52854630;52857749	52856998;52860731	ES	ENST00000371528.2	known	0.14	2	12.5	2	17;8	y	0.1	1	9.5	1	6;13	n	0.18	1	4.5	1	6;3	n	0	0	10.5	0	0;21	n	0	0	7.5	0	7;8	n	0	0	8.5	0	6;11	n	0.0261483	-6.06218	down	ENSG00000203995.10
novel_NIR_41450	chr20	45775602	45782946	-	45775602	45779845	5pMXE	ENST00000474942.5	novel	1	5	0	5	0	y	0.64	7	4	7	4	y	0.6	3	2	3	2	y	0	0	2	0	2	n	0.2	1	4	1	4	n	0.33	1	2	1	2	n	0.026226	-3.57728	down	ENSG00000124116.19
novel_NIR_33942	chr19	44716083	44719230	-	44716083	44724837	A5SS	ENST00000657348.1	novel	0.34	11	21	11	21	y	0.4	19	29	19	29	y	0.37	17	29	17	29	y	0.61	33	21	33	21	y	0.62	40	24	40	24	y	0.49	30	31	30	31	y	0.0262325	4.49698	up	ENSG00000266903.2
novel_NIR_6271	chr1	92833660	92833799	+	92833660	92833796	A3SS	ENST00000470843.5	novel	0.68	13	6	13	6	y	0.8	16	4	16	4	y	0.73	8	3	8	3	y	0.53	10	9	10	9	y	0.5	3	3	3	3	y	0.33	3	6	3	6	y	0.0262453	-3.97179	down	ENSG00000122406.14
novel_NIR_1398	chr1	154974045	154974248	-	154970199	154974248	A3SS	ENST00000368453.8	novel	0.09	8	79	8	79	n	0.15	21	119	21	119	y	0.16	18	95	18	95	y	0.01	1	105	1	105	n	0.01	1	98	1	98	n	0	0	103	0	103	n	0.0262482	-5.72872	down	ENSG00000160691.19
known_NIR_33672	chr20	35739017;35739547	35739393;35740824	-	35739017;35740597	35740525;35740824	MXE	ENST00000656873.1	known	0.03	1.5	51	2;1	46;56	n	0.07	4.5	58.5	8;1	61;56	n	0.12	6.5	49	12;1	52;46	n	0.19	11.5	48.5	22;1	50;47	n	0.22	12	43.5	18;6	50;37	y	0.18	11.5	51	23;0	50;52	n	0.0262676	4.30116	up	ENSG00000131051.24
known_NIR_21521	chr17	17276183	17281132	-	17276164	17281132	A3SS	ENST00000268717.10	known	0.02	2	89	2	89	y	0.08	12	146	12	146	y	0.05	6	123	6	123	y	0.14	19	115	19	115	y	0.1	15	132	15	132	y	0.15	18	105	18	105	y	0.0263678	3.4641	up	ENSG00000141030.13
known_NIR_39717	chr4	119512970	119519489	+	119512970	119528740	A3SS	ENST00000498873.5	known	0.09	2	21	2	21	y	0.05	2	35	2	35	y	0	0	6	0	6	n	0.19	7	29	7	29	y	0.33	4	8	4	8	y	0.21	7	27	7	27	y	0.0263683	3.86522	up	ENSG00000245958.6
novel_NIR_44677	chr3	112999559	113014377	+	113001105	113014377	A5SS&ES	ENST00000485330.5	novel	0.33	2	4	2	4	y	0.5	4	4	4	4	y	0.67	4	2	4	2	y	0.83	10	2	10	2	y	1	4	0	4	0	y	1	2	0	2	0	y	0.0263914	3.91176	up	ENSG00000163607.17
novel_NIR_13960	chr12	124778586;124782808	124782687;124786357	-	124778586	124786357	cassetteExon	ENST00000339570.9	novel	0.26	7	20	0;14	20	n	0.19	11.5	49	14;9	49	y	0.17	4.5	22	0;9	22	n	0.08	3.5	39	0;7	39	n	0.08	5.5	67	3;8	67	n	0.05	2.5	53	0;5	53	n	0.0263956	-4.70302	down	ENSG00000073060.17
novel_NIR_1851	chr1	159049605	159051679	+	159045464	159051679	A5SS	ENST00000340979.10	novel	1	2	0	2	0	y	0.83	5	1	5	1	y	-	-	-	-	-	-	-	-	-	-	-	-	0.2	1	4	1	4	n	0	0	1	0	1	n	0.0265565	-6.20981	down	ENSG00000163565.19
novel_NIR_18459	chr14	20439135	20442026	+	20439135	20440652	3pMXE	ENST00000555016.1	novel	-	-	-	-	-	-	0.17	1	5	1	5	n	0	0	4	0	4	n	1	2	0	2	0	y	0.8	4	1	4	1	y	-	-	-	-	-	-	0.0265565	6.20981	up	ENSG00000259162.1
known_NIR_28758	chr19	48633655	48634349	-	48633655	48635580	A5SS	ENST00000222122.10	known	0.3	18	43	18	43	y	0.43	21	28	21	28	y	0.35	23	42	23	42	y	0.56	25	20	25	20	y	0.56	39	31	39	31	y	0.47	38	42	38	42	y	0.0265912	3.51933	up	ENSG00000105516.11
known_NIR_27059	chr19	19133210	19138426	-	19133210	19134784	A5SS&ES	ENST00000587915.1	known	0.05	7	127	7	127	y	0.05	10	203	10	203	y	0.08	10	121	10	121	y	0	0	158	0	158	n	0	0	207	0	207	n	0	0	139	0	139	n	0.0266715	-6	down	ENSG00000064545.15
known_NIR_39626	chr4	105700014	105708638	-	105700014	105707919	A5SS	ENST00000416543.5	known	0.9	18	2	18	2	y	0.81	29	7	29	7	y	1	20	0	20	0	n	0.59	10	7	10	7	y	0.67	12	6	12	6	y	0.72	13	5	13	5	y	0.0266997	-3.65	down	ENSG00000138785.15
novel_NIR_57301	chr7	104168525	104188251	-	104187967	104188251	3pMXE	ENST00000485726.1	novel	0.57	4	3	4	3	y	0.62	5	3	5	3	y	-	-	-	-	-	-	0	0	1	0	1	n	0	0	4	0	4	n	-	-	-	-	-	-	0.026733	-23.8	down	ENSG00000164815.11
known_NIR_36252	chr22	50257945	50258243	-	50257660	50258243	A3SS	ENST00000492218.1	known	0.17	4	19	4	19	y	0	0	15	0	15	n	0.06	1	16	1	16	n	0.33	5	10	5	10	y	0.25	4	12	4	12	y	0.33	4	8	4	8	y	0.0267345	4.01391	up	ENSG00000188130.14
known_NIR_35082	chr21	46285394	46285803	-	46285394	46285699	A5SS	ENST00000426537.1	known	0	0	7	0	7	n	0.4	4	6	4	6	y	0	0	12	0	12	n	0.67	4	2	4	2	n	1	3	0	3	0	n	0.6	9	6	9	6	y	0.0267427	3.43191	up	ENSG00000160294.11
novel_NIR_40810	chr20	34526343	34534606	+	34526343	34529852	A3SS&ES	ENST00000480759.1	novel	0.17	5	25	5	25	y	0	0	5	0	5	n	0.23	3	10	3	10	y	0.61	14	9	14	9	y	0.49	25	26	25	26	y	0.35	6	11	6	11	y	0.026756	3.43387	up	ENSG00000125971.17
known_NIR_40936	chr4	86936481	86948498	+	86935240	86948498	A5SS	ENST00000504956.5	known	0	0	4	0	4	n	0	0	8	0	8	n	0	0	6	0	6	n	0.6	3	2	3	2	n	0.54	7	6	7	6	y	0.33	2	4	2	4	n	0.0267888	5.9863	up	ENSG00000172493.23
known_NIR_8400	chr11	614531	614797	-	614534	614797	A3SS	ENST00000528413.6	known	0.14	48	301	48	301	y	0.11	37	309	37	309	y	0.08	23	252	23	252	y	0.18	74	333	74	333	y	0.17	68	338	68	338	y	0.21	82	316	82	316	y	0.0268453	3.63662	up	ENSG00000185507.21
known_NIR_6460	chr10	97476744	97477347	-	97476744;97476963	97476835;97477347	ES	ENST00000415383.5	known	0.1	5	46.5	5	46;47	y	0.18	14	65.5	14	80;51	y	0.15	10	55	10	45;65	y	0	0	77.5	0	77;78	n	0.04	3	73	3	65;81	y	0.07	7	87.5	7	92;83	y	0.0268504	-3.45065	down	ENSG00000155229.21
novel_NIR_14478	chr12	191882	192478	-	191211	192478	A3SS	ENST00000397296.6	novel	0.16	27	140	27	140	y	0.18	26	120	26	120	y	0.23	25	83	25	83	y	0.08	13	150	13	150	n	0.13	30	200	30	200	n	0.08	15	172	15	172	n	0.0268592	-3.5	down	ENSG00000111181.13
known_NIR_40865	chr4	82857764	82862534	-	82857764	82861631	5pMXE	ENST00000512732.1	known	0.29	16	40	16	40	y	0.31	26	58	26	58	y	0.37	18	31	18	31	y	0.4	18	27	18	27	y	0.45	25	30	25	30	y	0.44	24	31	24	31	y	0.0268885	3.74532	up	ENSG00000138674.17
known_NIR_34890	chr21	39345274;39347292	39347247;39348292	-	39345274;39347483	39347379;39348292	MXE	ENST00000436324.5	known	0.24	13.5	42	21;6	58;26	y	0.28	11.5	29.5	21;2	34;25	y	0.26	10.5	30	20;1	30;30	n	0.18	8.5	39	16;1	44;34	n	0.14	4	25	7;1	27;23	n	0.09	6	61.5	8;4	71;52	y	0.0269149	-4.33052	down	ENSG00000205581.11
novel_NIR_52520	chr5	180793097;180795875	180795859;180808502	-	180793097	180808502	cassetteExon	ENST00000502678.1	novel	0.14	0.5	3	0;1	3	n	0	0	6	0;0	6	n	0.5	1	1	0;2	1	n	1	1	0	1;1	0	n	1	0.5	0	0;1	0	n	0.64	3.5	2	5;2	2	y	0.0270851	3.48578	up	ENSG00000131446.17
known_NIR_42758	chr5	6652008	6653447	+	6652008	6656078	A3SS	ENST00000510531.5	known	0.24	21	66	21	66	y	0.15	13	72	13	72	y	0.19	16	68	16	68	y	0.3	44	105	44	105	y	0.3	31	71	31	71	y	0.39	40	62	40	62	y	0.0271089	3.44064	up	ENSG00000145545.12
known_NIR_32928	chr2	86210613	86213628	+	86210613	86212426	3pMXE	ENST00000254644.12	known	0.91	202	20	202	20	y	0.9	197	21	197	21	y	0.91	178	18	178	18	y	0.85	202	35	202	35	y	0.88	240	34	240	34	y	0.86	262	43	262	43	y	0.0271218	-4.59619	down	ENSG00000132313.15
known_NIR_15137	chr14	24094254	24096892	+	24094434	24096892	A5SS	ENST00000396973.8	known	0.05	4	79	4	79	y	0.03	3	85	3	85	y	0.06	5	75	5	75	y	0	0	80	0	80	n	0	0	103	0	103	n	0.01	1	132	1	132	n	0.0271218	-4.59619	down	ENSG00000100889.12
known_NIR_51909	chrX	147943326	147944905	+	147943326	147944869	A3SS	ENST00000370475.9	known	0.11	6	51	6	51	y	0.12	8	59	8	59	y	0	0	23	0	23	n	0.26	14	40	14	40	y	0.3	15	35	15	35	y	0.19	10	44	10	44	y	0.0271459	3.45899	up	ENSG00000102081.15
known_NIR_39190	chr3	58831889	58863558	-	58831889	58849032	5pMXE	ENST00000484535.5	known	1	2	0	2	0	n	1	8	0	8	0	n	-	-	-	-	-	-	0	0	2	0	2	n	0.3	3	7	3	7	y	0.43	3	4	3	4	n	0.0271657	-5.9429	down	ENSG00000163689.20
novel_NIR_35030	chr19	53865737	53869754	+	53866417	53869754	5pMXE	ENST00000421337.6	novel	0	0	14	0	14	n	0	0	2	0	2	n	0	0	3	0	3	n	0.54	13	11	13	11	y	0.4	4	6	4	6	y	0.3	8	19	8	19	y	0.0272041	5.93852	up	ENSG00000179820.16
novel_NIR_65442	chr9	129111631	129120522	+	129111631	129123052	A3SS	ENST00000414331.5	novel	-	-	-	-	-	-	0.67	2	1	2	1	y	0.73	8	3	8	3	y	0	0	3	0	3	n	0	0	2	0	2	n	-	-	-	-	-	-	0.027267	-23.3333	down	ENSG00000119383.21
novel_NIR_41323	chr20	44695507	44716607	-	44695507	44716625	A5SS	ENST00000427598.5	novel	0.33	2	4	2	4	y	0.33	5	10	5	10	y	0.55	6	5	6	5	y	0	0	10	0	10	n	0.12	1	7	1	7	n	0.07	1	13	1	13	n	0.0272843	-4.18864	down	ENSG00000244558.6
known_NIR_9145	chr11	67353077	67353294	-	67353077	67353539	A5SS	ENST00000529704.5	known	0.68	30	14	30	14	y	0.68	49	23	49	23	y	0.73	44	16	44	16	y	0.78	39	11	39	11	y	0.77	61	18	61	18	y	0.79	31	8	31	8	y	0.0273491	4.72456	up	ENSG00000175482.9
known_NIR_34621	chr20	63708118	63708553	+	63707559	63708553	A5SS	ENST00000448100.6	known	0.95	39	2	39	2	y	1	32	0	32	0	n	1	38	0	38	0	n	0.9	35	4	35	4	y	0.89	77	10	77	10	y	0.91	32	3	32	3	y	0.0273491	-4.72456	down	ENSG00000197114.12
known_NIR_13560	chr12	79668408	79689729	-	79621207	79689729	A3SS	ENST00000328827.9	known	0.18	13	60	13	60	y	0.1	6	53	6	53	y	0.12	4	30	4	30	y	0.04	2	48	2	48	y	0	0	50	0	50	n	0.03	2	71	2	71	y	0.0273811	-4.09315	down	ENSG00000177425.11
known_NIR_8944	chr11	66000505	66002040	-	66000505	66001910	A5SS	ENST00000533544.6	known	0.35	9	17	9	17	y	0.41	7	10	7	10	y	0.11	2	17	2	17	y	0.67	12	6	12	6	y	0.86	6	1	6	1	n	0.59	16	11	16	11	y	0.0274503	3.42369	up	ENSG00000175376.9
known_NIR_29529	chr19	57868579	57876916	-	57850561	57876916	A3SS	ENST00000596604.5	known	0.12	4	30	4	30	y	0.11	2	17	2	17	y	0.19	8	35	8	35	y	0	0	20	0	20	n	0	0	21	0	21	n	0.07	2	26	2	26	y	0.0275322	-3.3995	down	ENSG00000204514.10
novel_NIR_47702	chr3	49962685	49967333	+	49962685	50048245	A3SS	ENST00000442092.5	novel	0.07	2	26	2	26	n	0	0	19	0	19	n	0	0	14	0	14	n	0.17	2	10	2	10	y	0.1	1	9	1	9	n	0.12	1	7	1	7	n	0.0275446	3.41121	up	ENSG00000004534.15
known_NIR_16511	chr14	94383379	94388560	-	94383002	94388560	A3SS	ENST00000554720.1	known	0.36	4	7	4	7	y	0.44	4	5	4	5	n	0.53	9	8	9	8	y	0.25	4	12	4	12	y	0	0	5	0	5	n	0.13	2	13	2	13	y	0.0275613	-3.62712	down	ENSG00000197249.14
known_NIR_50227	chr9	120862005	120862613	-	120862005	120862588	A5SS	ENST00000373896.8	known	0.22	2	7	2	7	n	0.12	4	30	4	30	y	0.17	4	20	4	20	y	0	0	31	0	31	n	0	0	29	0	29	n	0	0	10	0	10	n	0.0276449	-5.88897	down	ENSG00000119403.15
known_NIR_43134	chr5	91313781	91314165	-	91313777	91314165	A3SS	ENST00000649405.1	known	-	-	-	-	-	-	0.36	4	7	4	7	y	0.33	1	2	1	2	n	0	0	5	0	5	n	-	-	-	-	-	-	0	0	1	0	1	n	0.0276617	-23	down	ENSG00000248323.7
novel_NIR_7507	chr10	22573457	22607927	-	22573457	22591629	5pMXE	ENST00000323883.11	novel	0.24	10	32	10	32	y	0.19	8	34	8	34	y	0.13	4	27	4	27	n	0	0	32	0	32	n	0.01	1	74	1	74	n	0	0	28	0	28	n	0.0276781	-5.73415	down	ENSG00000150867.14
known_NIR_30498	chr2	174410503	174422885	+	174404315	174422885	A5SS	ENST00000437944.5	known	0.26	13	37	13	37	y	0.16	7	37	7	37	y	0.1	2	19	2	19	y	0.41	22	32	22	32	y	0.47	16	18	16	18	y	0.31	11	24	11	24	y	0.0276827	3.38401	up	ENSG00000144306.15
known_NIR_43874	chr6	2959342	2966400	-	2959342	2971248	A5SS	ENST00000643098.1	known	0.26	9	25	9	25	y	0.24	9	28	9	28	y	0.26	7	20	7	20	y	0.48	12	13	12	13	y	0.64	27	15	27	15	y	0.5	22	22	22	22	y	0.0277085	5.64618	up	ENSG00000124570.21
known_NIR_38193	chr3	38360408	38365199	+	38360408;38363017	38362937;38365199	ES	ENST00000207870.8	known	0	0	4	0	3;5	n	0.09	1	10	1	9;11	n	0	0	3	0	4;2	n	0.4	4	6	4	8;4	y	0.24	2	6.5	2	7;6	y	0.22	1	3.5	1	6;1	n	0.0277278	3.98691	up	ENSG00000093217.11
known_NIR_7066	chr11	126409411	126413397	+	126409411	126413587	A3SS	ENST00000678865.1	known	0	0	1	0	1	n	-	-	-	-	-	-	0	0	4	0	4	n	0.4	4	6	4	6	y	0.5	3	3	3	3	n	0.71	5	2	5	2	n	0.0277714	5.87497	up	ENSG00000110080.20
known_NIR_9591	chr11	75402446	75404672	+	75402379	75404672	A5SS	ENST00000534440.5	known	0.5	3	3	3	3	n	0.67	4	2	4	2	n	0.55	6	5	6	5	y	0.22	2	7	2	7	n	0.25	2	6	2	6	n	0.42	8	11	8	11	y	0.0278044	-3.45234	down	ENSG00000149273.15
known_NIR_27447	chr19	35739769	35740380	-	35740086	35740380	A3SS	ENST00000588018.5	known	0.67	16	8	16	8	y	0.68	13	6	13	6	y	0.57	16	12	16	12	y	0.44	16	20	16	20	y	0.5	5	5	5	5	y	0.52	14	13	14	13	y	0.0279379	-3.603	down	ENSG00000126246.10
novel_NIR_34426	chr19	48696079	48696408	+	48696079	48696379	A3SS	ENST00000522283.1	novel	0	0	5	0	5	n	0	0	1	0	1	n	0	0	2	0	2	n	0.4	4	6	4	6	y	0.67	2	1	2	1	y	0.43	3	4	3	4	y	0.0279803	5.85206	up	ENSG00000176920.13
known_NIR_51355	chr9	65703014;65704414	65704331;65708902	+	65703014	65708902	cassetteExon	ENST00000377389.5	known	0.14	0.5	3	0;1	3	n	0.29	2	5	0;4	5	n	0	0	8	0;0	8	n	0.58	7	5	7;7	5	y	0.8	4	1	4;4	1	n	0.44	4	5	4;4	5	y	0.0279841	3.45455	up	ENSG00000147996.17
known_NIR_29562	chr19	58280609	58285717	+	58279147	58285717	A5SS	ENST00000621650.2	known	0.5	3	3	3	3	n	1	2	0	2	0	n	0.75	9	3	9	3	y	0	0	2	0	2	n	0.17	1	5	1	5	n	0	0	11	0	11	n	0.0279856	-4.47131	down	ENSG00000278129.2
known_NIR_12288	chr12	53295941	53297850	+	53296551	53297850	A5SS	ENST00000552548.6	known	0.17	25	124	25	124	y	0.23	46	154	46	154	y	0.19	22	96	22	96	y	0.29	48	118	48	118	y	0.28	38	97	38	97	y	0.26	33	94	33	94	y	0.0280208	4.05674	up	ENSG00000123349.15
novel_NIR_20157	chr14	94096965	94098509	+	94096965	94102477	A3SS	ENST00000554544.5	novel	0.38	3	5	3	5	y	0.6	3	2	3	2	y	0.4	6	9	6	9	y	0.2	2	8	2	8	y	0.2	1	4	1	4	n	0	0	1	0	1	n	0.0280752	-3.3733	down	ENSG00000165948.11
known_NIR_50712	chr9	131503073;131504340	131504189;131508911	+	131503073;131507514	131506114;131508911	MXE	ENST00000341012.13	known	0.12	3.5	25	7;0	3;47	n	0.26	7	19.5	14;0	4;35	n	0.25	4	12	8;0	4;20	n	0.45	14.5	18	29;0	10;26	n	0.35	11.5	21.5	23;0	8;35	n	0.42	15	20.5	28;2	6;35	y	0.0280955	3.64503	up	ENSG00000130714.19
known_NIR_21090	chr16	89687815;89689306	89689252;89690553	+	89687815	89690553	cassetteExon	ENST00000512912.5	known	0.83	14.5	3	23;6	3	y	0.82	13.5	3	16;11	3	y	0.86	6	1	10;2	1	n	0.76	6.5	2	8;5	2	y	0.72	10.5	4	13;8	4	y	0.67	16	8	22;10	8	y	0.0281384	-4.18491	down	ENSG00000185324.22
known_NIR_2708	chr1	23030634;23044486	23044427;23050387	+	23030634	23050387	cassetteExon	ENST00000465864.2	known	0.44	51.5	66	53;50	66	y	0.48	80	86	73;87	86	y	0.45	56.5	68	58;55	68	y	0.34	48.5	94	51;46	94	y	0.38	58.5	97	59;58	97	y	0.29	44	110	45;43	110	y	0.0281384	-4.18491	down	ENSG00000004487.17
known_NIR_43878	chr6	2959342	2968779	-	2959342	2971248	A5SS	ENST00000643098.1	known	0.14	4	25	4	25	y	0.12	4	28	4	28	y	0.09	2	20	2	20	y	0.46	11	13	11	13	y	0.32	7	15	7	15	y	0.31	10	22	10	22	y	0.0281673	4.87942	up	ENSG00000124570.21
known_NIR_37653	chr3	184362146	184362873	+	184362146	184364966	A3SS	ENST00000438240.5	known	0.62	20	12	20	12	y	0.62	28	17	28	17	y	0.51	19	18	19	18	y	0.75	43	14	43	14	y	0.7	42	18	42	18	y	0.78	25	7	25	7	y	0.0281948	3.68143	up	ENSG00000163882.9
novel_NIR_63452	chr8	22024257	22025436	+	22024257;22025306	22024724;22025436	ES	ENST00000521157.5	novel	0.5	2	2	2	0;4	y	0.5	2	2	2	0;4	y	-	-	-	-	-	-	0	0	0.5	0	0;1	n	0.22	1	3.5	1	0;7	n	0	0	4	0	0;8	n	0.0282933	-5.81818	down	ENSG00000158806.14
novel_NIR_23388	chr16	28863754	28867374	+	28863754	28867331	A3SS	ENST00000545570.5	novel	0	0	3	0	3	n	0.25	4	12	4	12	y	0	0	4	0	4	n	0.64	7	4	7	4	y	0.33	3	6	3	6	y	0.63	12	7	12	7	y	0.0283626	3.42239	up	ENSG00000178188.15
novel_NIR_68789	chrX	71108346	71108621	-	71108346	71109228	A5SS	ENST00000644708.1	novel	0.62	15	9	15	9	y	0.59	19	13	19	13	y	0.42	11	15	11	15	y	0.29	10	25	10	25	n	0.28	7	18	7	18	n	0.2	4	16	4	16	n	0.0283812	-4.18641	down	ENSG00000285171.1
known_NIR_38939	chr3	51958152	51958790	-	51958349	51958790	A3SS	ENST00000355852.6	known	0.1	17	155	17	155	y	0.13	25	167	25	167	y	0.1	15	140	15	140	y	0.18	36	163	36	163	y	0.14	31	193	31	193	y	0.17	29	144	29	144	y	0.0284054	3.41121	up	ENSG00000090097.22
known_NIR_35284	chr22	20052584;20053551	20053437;20063338	+	20052584;20061683	20055943;20063338	MXE	ENST00000432883.5	known	0.22	16	56	32;0	43;69	n	0.3	21	50	42;0	36;64	n	0.26	15	43	30;0	35;51	n	0.14	11	66	22;0	61;71	n	0.15	10	57.5	18;2	51;64	y	0.18	10	46.5	20;0	47;46	n	0.0284188	-3.96914	down	ENSG00000183597.16
novel_NIR_62201	chr8	127794734	127867439	+	127794734	127989162	A3SS	ENST00000657693.1	novel	1	8	0	8	0	y	1	8	0	8	0	y	1	1	0	1	0	n	0.67	4	2	4	2	y	0.5	1	1	1	1	n	0.71	5	2	5	2	y	0.0284715	-5.79914	down	ENSG00000249859.12
known_NIR_8232	chr11	57426352	57427062	-	57426750	57427062	A3SS&ES	ENST00000530316.5	known	0.53	10	9	10	9	y	0.67	2	1	2	1	n	0.33	2	4	2	4	n	0.83	5	1	5	1	n	1	3	0	3	0	n	1	9	0	9	0	n	0.0285491	3.80873	up	ENSG00000134802.18
known_NIR_51352	chr9	65703014	65708902	+	65703014	65704331	A3SS&ES	ENST00000377392.9	known	1	3	0	3	0	n	1	5	0	5	0	n	1	8	0	8	0	n	0.42	5	7	5	7	y	0.2	1	4	1	4	n	0.56	5	4	5	4	n	0.0285559	-5.79019	down	ENSG00000147996.17
known_NIR_1945	chr1	179083053	179087911	+	179083053;179085893	179085628;179087911	ES	ENST00000367627.8	known	0.1	23	211	23	130;292	y	0.08	20	218	20	142;294	y	0.1	17	151	17	84;218	y	0.06	11	177.5	11	117;238	y	0.06	14	203	14	128;278	y	0.03	7	202	7	102;302	y	0.0285822	-3.60555	down	ENSG00000186283.14
known_NIR_44331	chr6	32154777	32155768	+	32154777	32155030	A3SS&ES	ENST00000414204.5	known	0	0	85	0	85	n	0.02	2	97	2	97	y	0	0	49	0	49	n	0.04	3	71	3	71	y	0.04	2	52	2	52	y	0.07	5	70	5	70	y	0.0285822	3.60555	up	ENSG00000221988.13
known_NIR_52133	chrX	154032557	154056941	-	154032557	154092184	A5SS	ENST00000303391.11	known	0.13	25	173	25	173	y	0.11	20	170	20	170	y	0.13	21	142	21	142	y	0.07	10	135	10	135	y	0.1	21	183	21	183	y	0.07	15	211	15	211	y	0.0285822	-3.60555	down	ENSG00000169057.24
known_NIR_52247	chrX	154548089	154551988	+	154542387	154551988	A5SS	ENST00000612051.1	known	0.22	2	7	2	7	n	0.12	2	14	2	14	y	0	0	5	0	5	n	0.38	6	10	6	10	y	0.67	4	2	4	2	n	0.44	8	10	8	10	y	0.0285954	3.52059	up	ENSG00000269335.6
known_NIR_23216	chr17	57119044	57121279	+	57119044	57120250	A3SS	ENST00000337714.8	known	0.06	22	340	22	340	y	0.04	13	339	13	339	y	0.04	8	171	8	171	y	0.02	6	298	6	298	y	0.01	5	340	5	340	y	0.02	7	312	7	312	y	0.0285958	-4.02492	down	ENSG00000121057.13
known_NIR_26108	chr19	10830378	10832992	+	10830378	10830978	3pMXE	ENST00000355667.11	known	0.04	14	321	14	321	y	0.02	6	292	6	292	y	0.04	9	234	9	234	y	0	0	264	0	264	n	0	0	265	0	265	n	0.01	3	300	3	300	y	0.0285958	-4.02492	down	ENSG00000079805.19
known_NIR_28931	chr19	49663258;49664846	49664553;49665631	-	49663258	49665631	cassetteExon	ENST00000596765.5	known	0.61	109.5	71	0;219	71	n	0.63	97	57	0;194	57	n	0.61	70	45	0;140	45	n	0.69	102	46	0;204	46	n	0.69	99	45	5;193	45	y	0.65	96	51	0;192	51	n	0.0285958	4.02492	up	ENSG00000126456.16
known_NIR_47991	chr8	102257717;102258424	102258316;102258985	-	102257717	102258985	cassetteExon	ENST00000520539.6	known	0.02	2	90	2;2	90	y	0.04	5.5	120	9;2	120	y	0.04	2	51	2;2	51	y	0	0	86	0;0	86	n	0	0	67	0;0	67	n	0.01	1	75	2;0	75	n	0.0285958	-4.02492	down	ENSG00000104517.13
known_NIR_20107	chr16	67174946	67175047	+	67174944	67175047	A5SS	ENST00000268605.11	known	0.06	15	246	15	246	y	0.08	26	310	26	310	y	0.08	20	224	20	224	y	0.04	12	273	12	273	y	0.04	13	288	13	288	y	0.05	19	340	19	340	y	0.0285958	-4.02492	down	ENSG00000140939.14
known_NIR_42501	chr5	306754	311293	+	272772	311293	A5SS	ENST00000618970.4	known	0.98	187	3	187	3	y	0.99	265	4	265	4	y	0.99	183	2	183	2	y	0.97	195	7	195	7	y	0.95	188	9	188	9	y	0.95	228	12	228	12	y	0.0285958	-4.02492	down	ENSG00000249915.8
known_NIR_42610	chr5	41934308	41941192	+	41939616	41941192	5pMXE	ENST00000505566.1	known	0	0	62	0	62	n	0.03	2	77	2	77	y	0	0	67	0	67	n	0.06	3	44	3	44	y	0.12	9	66	9	66	y	0.12	8	61	8	61	y	0.0285958	4.02492	up	ENSG00000151876.13
known_NIR_46718	chr7	32988652	32994991	+	32988652	32996163	A3SS	ENST00000538336.5	known	0.17	25	126	25	126	y	0.12	21	154	21	154	y	0.15	21	120	21	120	y	0.08	10	110	10	110	y	0.07	13	165	13	165	y	0.1	15	141	15	141	y	0.0286094	-3.72621	down	ENSG00000122642.11
known_NIR_39531	chr4	102690771;102690957	102690880;102714438	-	102690771	102714438	cassetteExon	ENST00000647097.2	known	0.43	1.5	2	0;3	2	n	0.43	3	4	5;1	4	n	0.29	4	10	0;8	10	n	0.17	1	5	1;1	5	n	0.13	1.5	10	1;2	10	n	0.2	3	12	4;2	12	y	0.0286314	-4.25829	down	ENSG00000109323.11
novel_NIR_38110	chr2	240562596	240563727	+	240562596	240563674	A3SS	ENST00000479788.5	novel	0.22	2	7	2	7	y	0.43	3	4	3	4	y	0.29	2	5	2	5	y	0	0	8	0	8	n	0.08	1	12	1	12	n	0	0	8	0	8	n	0.0287178	-4.26286	down	ENSG00000188542.10
known_NIR_15133	chr14	23995133	24000863	+	23995133	24004337	A3SS	ENST00000397071.5	known	0.25	14	43	14	43	y	0.16	12	61	12	61	y	0.26	13	37	13	37	y	0.43	38	50	38	50	y	0.32	17	36	17	36	y	0.45	25	31	25	31	y	0.0287473	3.43548	up	ENSG00000187630.17
known_NIR_7136	chr11	130233382	130237010	-	130234273	130237010	A3SS	ENST00000525842.5	known	0.5	1	1	1	1	n	0.5	2	2	2	2	n	0.33	1	2	1	2	n	0.25	3	9	3	9	y	0	0	5	0	5	n	0	0	18	0	18	n	0.0288134	-3.57232	down	ENSG00000196323.14
known_NIR_9482	chr11	73264649;73272466	73272307;73295730	+	73264649	73295730	cassetteExon	ENST00000393592.7	known	0.62	10	6	3;17	6	y	0.47	3.5	4	1;6	4	n	0.43	1.5	2	0;3	2	n	0.82	9	2	5;13	2	y	1	12	0	18;6	0	n	0.73	5.5	2	8;3	2	y	0.0288908	3.49605	up	ENSG00000171631.16
known_NIR_9311	chr11	68583129	68587945	+	68583129	68587927	A3SS	ENST00000534534.5	known	0	0	8	0	8	n	0	0	15	0	15	n	0	0	10	0	10	n	0.08	1	12	1	12	n	0.12	2	15	2	15	y	0.15	2	11	2	11	y	0.0289011	5.75396	up	ENSG00000110075.15
known_NIR_43602	chr6	147676155	147733729	+	147660819	147733729	A5SS	ENST00000432506.5	known	0.04	2	54	2	54	y	0.05	2	39	2	39	y	0	0	22	0	22	n	0.16	8	41	8	41	y	0.11	3	25	3	25	y	0.09	4	43	4	43	y	0.0289781	3.48569	up	ENSG00000227681.5
novel_NIR_31286	chr18	76809504	76822016	-	76816842	76822016	A3SS&ES	ENST00000585258.1	novel	0.36	8	14	8	14	y	0.25	4	12	4	12	y	0.1	2	19	2	19	n	0.65	13	7	13	7	y	0.67	10	5	10	5	y	0.67	8	4	8	4	y	0.0289892	5.64035	up	ENSG00000264278.1
known_NIR_22959	chr17	49622876;49636809	49636759;49677933	-	49622876;49676016	49668027;49677933	MXE	ENST00000451526.6	known	0.83	2.5	0.5	5;0	1;0	n	0.87	6.5	1	10;3	2;0	n	0.81	8.5	2	16;1	0;4	n	0.4	1	1.5	2;0	1;2	n	0.58	3.5	2.5	6;1	0;5	n	0.59	11	7.5	17;5	12;3	y	0.0290111	-4.88024	down	ENSG00000121067.19
known_NIR_46378	chr7	155806557	155806711	-	155806557	155811823	A5SS	ENST00000297261.7	known	0.83	35	7	35	7	y	0.81	46	11	46	11	y	0.84	26	5	26	5	y	0.77	33	10	33	10	y	0.7	44	19	44	19	y	0.72	38	15	38	15	y	0.0290394	-4.27582	down	ENSG00000164690.8
known_NIR_2216	chr1	205088815	205094987	-	205088815	205094873	A5SS	ENST00000264515.11	known	0.4	14	21	14	21	y	0.43	12	16	12	16	y	0.38	3	5	3	5	n	0.22	11	39	11	39	y	0.3	8	19	8	19	y	0.31	8	18	8	18	y	0.0291645	-3.96177	down	ENSG00000117222.14
known_NIR_45529	chr7	107564209	107567050	+	107564676	107567050	A5SS&ES	ENST00000498786.5	known	0.06	3	45	3	45	y	0.07	3	42	3	42	y	0	0	28	0	28	n	0.21	8	31	8	31	y	0.27	13	35	13	35	y	0.14	4	25	4	25	y	0.0292056	3.75813	up	ENSG00000105865.11
novel_NIR_44322	chr22	46912188	46997634	+	46912188;46913446	46913334;46997634	ES	ENST00000441162.5	novel	0.5	1	1	1	2;0	n	0.67	4	2	4	4;0	y	0.55	3	2.5	3	5;0	y	0	0	2	0	4;0	n	0.27	2	5.5	2	11;0	y	0.27	2	5.5	2	11;0	y	0.0292245	-3.81241	down	ENSG00000054611.14
novel_NIR_63139	chr8	144292619;144306767	144306548;144308906	+	144292619;144293580	144293462;144308906	MXE	ENST00000528988.1	novel	0.89	4	0.5	4;4	1;0	y	1	4	0	0;8	0;0	n	1	5	0	1;9	0;0	n	0.24	2	6.5	1;3	7;6	n	0.33	2	4	0;4	6;2	n	0.62	6.5	4	0;13	8;0	n	0.0292301	-4.70771	down	ENSG00000185122.11
known_NIR_13588	chr12	88035738	88042825	+	88040265	88042825	A5SS&ES	ENST00000548757.6	known	0.34	42	82	42	82	y	0.31	49	109	49	109	y	0.35	31	57	31	57	y	0.17	28	139	28	139	y	0.25	27	80	27	80	y	0.24	48	148	48	148	y	0.0292648	-4.06378	down	ENSG00000133641.18
novel_NIR_17365	chr13	27622009	27622876	+	27622009	27622841	A3SS	ENST00000399696.3	novel	0	0	10	0	10	n	0	0	16	0	16	n	0	0	7	0	7	n	0.36	4	7	4	7	y	0.2	2	8	2	8	y	0.25	1	3	1	3	n	0.029296	5.7133	up	ENSG00000186184.19
known_NIR_23029	chr17	50464294	50471028	+	50464599	50471028	A5SS&ES	ENST00000507769.1	known	0.74	29	10	29	10	y	0.8	41	10	41	10	y	0.85	33	6	33	6	y	0.65	36	19	36	19	y	0.7	26	11	26	11	y	0.63	42	25	42	25	y	0.0293088	-3.59594	down	ENSG00000167107.13
novel_NIR_29085	chr17	7313058	7313212	-	7313097	7313212	A3SS	ENST00000573684.5	novel	0	0	8	0	8	n	0	0	13	0	13	n	0	0	8	0	8	n	0.23	6	20	6	20	y	0.42	8	11	8	11	y	0.3	6	14	6	14	y	0.0293481	5.708	up	ENSG00000132522.16
known_NIR_2289	chr1	20779911;20780540	20780350;20787195	-	20779911	20787195	cassetteExon	ENST00000424732.5	known	0.49	13.5	14	2;25	14	y	0.47	3.5	4	2;5	4	y	0.44	5.5	7	2;9	7	y	0.88	7	1	4;10	1	n	0.75	9	3	4;14	3	y	0.68	12.5	6	4;21	6	y	0.029357	5.02463	up	ENSG00000127483.19
known_NIR_35417	chr22	23683867;23686995	23686838;23690236	-	23683867	23690236	cassetteExon	ENST00000451837.5	known	0.26	9.5	27	12;7	27	y	0.21	7.5	29	13;2	29	y	0	0	17	0;0	17	n	0.6	16.5	11	24;9	11	y	0.57	6.5	5	12;1	5	n	0.53	9	8	4;14	8	y	0.0294409	4.98831	up	ENSG00000228315.12
known_NIR_6356	chr10	89328078	89337425	+	89332627	89337425	5pMXE	ENST00000680037.1	known	0.78	7	2	7	2	n	1	1	0	1	0	n	-	-	-	-	-	-	0.27	3	8	3	8	y	0	0	1	0	1	n	0.11	1	8	1	8	n	0.0294517	-5.65131	down	ENSG00000119917.15
novel_NIR_53251	chr5	6773686	6775559	+	6765981	6775559	A5SS	ENST00000649262.1	novel	0.17	1	5	1	5	n	0.17	2	10	2	10	n	0.18	2	9	2	9	y	0.6	3	2	3	2	y	0.4	6	9	6	9	n	0.5	2	2	2	2	y	0.029495	5.64863	up	ENSG00000251365.4
known_NIR_20334	chr16	69368482	69370483	-	69368595	69370483	A3SS	ENST00000564982.6	known	0.87	103	16	103	16	y	0.84	93	18	93	18	y	0.87	66	10	66	10	y	0.93	113	9	113	9	y	0.91	72	7	72	7	y	0.97	64	2	64	2	y	0.0295197	3.78118	up	ENSG00000132604.11
novel_NIR_34776	chr19	50799357	50802027	-	50799357	50801183	A5SS&ES	ENST00000596554.5	novel	0.25	1	3	1	3	n	0	0	3	0	3	n	0.29	4	10	4	10	n	0.5	8	8	8	8	y	0.54	7	6	7	6	y	0.8	4	1	4	1	y	0.0295468	3.31594	up	ENSG00000167747.15
known_NIR_10143	chr12	10213219	10218063	+	10213219	10213836	3pMXE	ENST00000629504.1	known	0.83	195	40	195	40	y	0.86	180	29	180	29	y	0.84	149	28	149	28	y	0.95	218	12	218	12	y	0.89	212	25	212	25	y	0.92	229	19	229	19	y	0.0295575	3.94447	up	ENSG00000139112.11
novel_NIR_18340	chr14	105092909	105095540	+	105095442	105095540	5pMXE	ENST00000655276.1	novel	1	31	0	31	0	y	1	19	0	19	0	y	-	-	-	-	-	-	0.83	10	2	10	2	y	0.8	4	1	4	1	y	0.7	7	3	7	3	y	0.0295968	-5.68287	down	ENSG00000257556.2
known_NIR_33986	chr20	44211356	44224821	+	44211356;44215003	44214888;44224821	ES	ENST00000655968.1	known	0	0	9	0	11;7	n	0	0	0.5	0	1;0	n	0	0	1	0	1;1	n	0.36	2	3.5	2	5;2	n	0.23	3	10	3	6;14	y	0.21	2	7.5	2	2;13	y	0.0297148	5.67105	up	ENSG00000223891.6
novel_NIR_61091	chr7	882380	886056	+	866067	886056	A5SS	ENST00000457861.1	novel	0.78	7	2	7	2	y	0.6	3	2	3	2	y	0.6	3	2	3	2	y	1	6	0	6	0	y	1	8	0	8	0	y	1	2	0	2	0	y	0.0297588	5.66667	up	ENSG00000164828.18
known_NIR_43855	chr6	28281918	28283776	+	28281918	28283756	A3SS	ENST00000259883.3	known	1	4	0	4	0	n	-	-	-	-	-	-	1	2	0	2	0	n	0.75	6	2	6	2	n	0.67	2	1	2	1	n	0.54	7	6	7	6	y	0.0297731	-5.66524	down	ENSG00000137338.6
known_NIR_34882	chr21	39345274;39345958	39345830;39347247	-	39345274	39347247	cassetteExon	ENST00000482192.5	known	0.77	72	21	130;14	21	y	0.78	72.5	21	119;26	21	y	0.68	42	20	75;9	20	y	0.83	76	16	127;25	16	y	0.9	64.5	7	114;15	7	y	0.92	90	8	151;29	8	y	0.0298126	3.34134	up	ENSG00000205581.11
known_NIR_3123	chr1	26286037;26301053	26300926;26301694	-	26286037;26298062	26294205;26301694	MXE	ENST00000475591.5	known	0.13	8.5	56	4;13	75;37	y	0.14	11	66.5	5;17	97;36	y	0.07	4.5	59.5	1;8	95;24	n	0	0	63.5	0;0	88;39	n	0.01	1	66	2;0	98;34	n	0.05	4.5	78.5	0;9	125;32	n	0.0298306	-3.5	down	ENSG00000158062.20
novel_NIR_56836	chr7	100050836	100056911	+	100051610	100056911	A5SS&ES	ENST00000438937.1	novel	0.38	5	8	5	8	y	0.5	13	13	13	13	y	0.6	6	4	6	4	y	0.23	6	20	6	20	y	0.15	5	28	5	28	y	0.28	5	13	5	13	n	0.0299172	-3.69309	down	ENSG00000166529.15
novel_NIR_35294	chr19	57435593	57438102	+	57435523	57438102	A5SS	ENST00000600697.1	novel	0	0	4	0	4	n	0	0	9	0	9	n	0	0	2	0	2	n	-	-	-	-	-	-	1	74	0	74	0	y	0.91	74	7	74	7	y	0.0299756	21.2222	up	ENSG00000186230.7
known_NIR_23951	chr17	75488910	75489266	+	75486426	75489266	A5SS	ENST00000580441.5	known	0.71	15	6	15	6	y	0.65	13	7	13	7	y	0.78	7	2	7	2	n	0.92	11	1	11	1	n	0.87	20	3	20	3	y	0.83	15	3	15	3	y	0.0300303	3.50076	up	ENSG00000177728.17
novel_NIR_50971	chr5	1035473	1036254	+	1035473	1036257	A3SS	ENST00000296849.10	novel	0.19	4	17	4	17	y	0.17	6	29	6	29	y	0.1	2	18	2	18	n	0	0	26	0	26	n	0	0	8	0	8	n	0	0	15	0	15	n	0.0302349	-5.61979	down	ENSG00000145506.14
known_NIR_34614	chr20	63706738	63707867	-	63706738	63706999	5pMXE	ENST00000612256.4	known	0.06	10	171	10	171	y	0.02	4	206	4	206	y	0.03	6	177	6	177	y	0.1	17	156	17	156	y	0.08	22	244	22	244	y	0.09	21	209	21	209	y	0.0302764	4	up	ENSG00000101246.20
known_NIR_21886	chr17	30118173	30150102	+	30118173	30127859	3pMXE	ENST00000584423.5	known	0	0	8	0	8	n	0	0	11	0	11	n	0	0	4	0	4	n	0.33	6	12	6	12	y	-	-	-	-	-	-	0.3	7	16	7	16	y	0.0302923	21	up	ENSG00000126653.18
known_NIR_44550	chr6	39907117	39909835	-	39907117;39909102	39909040;39909835	ES	ENST00000645522.1	known	0	0	5.5	0	3;8	n	0	0	8	0	4;12	n	0	0	1	0	1;1	n	0.5	4	4	4	4;4	y	-	-	-	-	-	-	0.55	3	2.5	3	4;1	n	0.0302923	21	up	ENSG00000124615.20
novel_NIR_1344	chr1	154212377	154212458	-	154207648	154212458	A3SS	ENST00000640799.1	novel	0.4	4	6	4	6	y	-	-	-	-	-	-	0.44	4	5	4	5	n	-	-	-	-	-	-	0	0	2	0	2	n	0	0	7	0	7	n	0.0302923	-21	down	ENSG00000143612.21
novel_NIR_25364	chr16	80988007	80997314	-	80991957	80997314	A3SS&ES	ENST00000567593.5	novel	0.22	4	14	4	14	y	0.2	1	4	1	4	n	-	-	-	-	-	-	0	0	5	0	5	n	0	0	14	0	14	n	0	0	12	0	12	n	0.0302923	-21	down	ENSG00000103121.9
known_NIR_51877	chrX	136497439	136497676	+	136497439	136497624	A3SS	ENST00000535601.5	known	0.41	7	10	7	10	y	0.59	22	15	22	15	y	0.6	12	8	12	8	y	0.21	6	23	6	23	y	0.26	5	14	5	14	y	0.34	12	23	12	23	y	0.0302956	-3.63627	down	ENSG00000102241.12
novel_NIR_55717	chr6	33415144	33415215	+	33415144	33415590	A3SS	ENST00000374512.7	novel	0.56	9	7	9	7	y	0.43	3	4	3	4	y	0.85	11	2	11	2	y	0.17	1	5	1	5	n	0	0	9	0	9	n	0	0	5	0	5	n	0.0303285	-4.07924	down	ENSG00000112511.18
known_NIR_51793	chrX	130005317	130012578	+	130005317;130010663	130010508;130012578	ES	ENST00000488135.6	known	1	1	0	1	0;0	n	0.75	3	1	3	0;2	n	-	-	-	-	-	-	0	0	0.5	0	1;0	n	0.33	2	4	2	6;2	y	0	0	0.5	0	0;1	n	0.0304079	-4.59437	down	ENSG00000085185.16
known_NIR_13271	chr12	6769177	6769603	+	6765638	6769603	A5SS	ENST00000540667.5	known	0.53	8	7	8	7	y	0.77	10	3	10	3	y	0.73	8	3	8	3	y	0.38	5	8	5	8	y	0	0	8	0	8	n	0.24	5	16	5	16	y	0.0305004	-3.5206	down	ENSG00000159335.18
known_NIR_22390	chr17	42316851	42317182	-	42316901	42317182	A3SS	ENST00000264657.10	known	0.1	22	198	22	198	y	0.16	41	216	41	216	y	0.13	22	151	22	151	y	0.08	18	221	18	221	y	0.04	7	158	7	158	y	0.05	12	242	12	242	y	0.0305569	-3.47851	down	ENSG00000168610.16
known_NIR_37813	chr3	195519185;195523786	195523692;195529794	-	195519185;195524896	195524819;195529794	MXE	ENST00000418939.1	known	0.33	19	39	38;0	3;75	n	0.39	18	28	36;0	0;56	n	0.27	7	19	14;0	2;36	n	0.57	25.5	19	51;0	0;38	n	0.47	21	24	40;2	0;48	n	0.45	26.5	32	50;3	6;58	y	0.0306382	3.28266	up	ENSG00000184203.8
novel_NIR_61386	chr7	99333417	99338183	+	99333417	99335453	A3SS&ES	ENST00000441989.6	novel	0	0	4	0	4	n	0	0	5	0	5	n	0.12	1	7	1	7	n	0.27	3	8	3	8	y	0.18	3	14	3	14	y	0.18	2	9	2	9	y	0.0306704	3.4	up	ENSG00000284292.1
known_NIR_35286	chr22	20052584;20056013	20055943;20061530	+	20052584	20061530	cassetteExon	ENST00000401886.5	known	0.86	37.5	6	43;32	6	y	0.91	42.5	4	36;49	4	y	0.86	30.5	5	35;26	5	y	0.96	50.5	2	61;40	2	y	0.94	61.5	4	51;72	4	y	0.96	52	2	47;57	2	y	0.0306787	4.27099	up	ENSG00000183597.16
novel_NIR_26102	chr16	90009430	90013144	-	90009430	90019728	A5SS	ENST00000568838.2	novel	0	0	4	0	4	n	0	0	5	0	5	n	0	0	13	0	13	n	0.26	6	17	6	17	y	0.43	9	12	9	12	y	0.5	4	4	4	4	y	0.0307891	5.56659	up	ENSG00000003249.15
novel_NIR_39677	chr2	75652657	75670579	+	75652657	75679775	A3SS	ENST00000358788.10	novel	-	-	-	-	-	-	1	2	0	2	0	y	1	8	0	8	0	y	0.67	8	4	8	4	y	0.43	3	4	3	4	y	0.64	7	4	7	4	y	0.0308266	-5.56304	down	ENSG00000115364.14
novel_NIR_55447	chr6	31410797	31411209	+	31410797	31411947	A3SS	ENST00000421350.1	novel	0.64	7	4	7	4	y	0.85	17	3	17	3	y	0.67	20	10	20	10	y	0.38	11	18	11	18	y	0.42	8	11	8	11	y	0.53	9	8	9	8	n	0.0308456	-3.4826	down	ENSG00000204520.14
novel_NIR_41099	chr20	3758678	3759308	-	3758678	3760007	A5SS	ENST00000217195.12	novel	0.14	2	12	2	12	n	0.2	4	16	4	16	y	0.25	4	12	4	12	y	0	0	16	0	16	n	0	0	37	0	37	n	0.11	1	8	1	8	n	0.0309242	-3.29665	down	ENSG00000101220.18
novel_NIR_58320	chr7	139780824	139782445	+	139780824	139782666	A3SS	ENST00000650822.1	novel	0.07	3	38	3	38	n	0	0	32	0	32	n	0.03	1	33	1	33	n	0.11	4	34	4	34	n	0.1	2	19	2	19	n	0.16	5	26	5	26	y	0.031018	3.27423	up	ENSG00000059377.18
novel_NIR_5444	chr1	51305146	51305241	-	51305146	51305977	A5SS	ENST00000447632.6	novel	0.02	1	55	1	55	n	0	0	63	0	63	n	0.09	6	61	6	61	n	0.18	10	47	10	47	y	0.17	13	62	13	62	y	0.11	7	57	7	57	n	0.0310185	3.33712	up	ENSG00000085831.16
novel_NIR_23048	chr16	21818761	21819109	-	21818761	21819302	A5SS	ENST00000551681.1	novel	0	0	4	0	4	n	0.38	6	10	6	10	y	0	0	7	0	7	n	1	2	0	2	0	y	1	2	0	2	0	y	0.5	2	2	2	2	y	0.0310276	3.37573	up	ENSG00000248124.8
known_NIR_10050	chr11	93754037;93757465	93757316;93759742	+	93754037;93755386	93755210;93759742	MXE	ENST00000528288.5	known	0.5	27	27.5	4;50	50;5	y	0.55	33.5	27.5	0;67	41;14	n	0.47	20	22.5	2;38	40;5	y	0.65	34	18.5	5;63	28;9	y	0.62	26	16	1;51	25;7	n	0.75	42.5	14	0;85	25;3	n	0.0310563	3.64662	up	ENSG00000182919.15
known_NIR_14750	chr14	105496086	105497357	+	105492734	105497357	A5SS	ENST00000329886.11	known	0.2	6	24	6	24	y	0.31	10	22	10	22	y	0.18	5	23	5	23	y	0.41	17	24	17	24	y	0.44	11	14	11	14	y	0.35	8	15	8	15	y	0.0311558	3.51933	up	ENSG00000185347.18
known_NIR_8130	chr11	47704728	47710377	-	47704728;47705917	47705864;47710377	ES	ENST00000528244.5	known	1	4	0	4	0;0	n	0.75	6	2	6	2;2	y	-	-	-	-	-	-	0.4	2	3	2	5;1	n	0	0	1	0	0;2	n	0	0	2	0	4;0	n	0.0312263	-4.05805	down	ENSG00000165923.16
known_NIR_45940	chr7	139778471;139780824	139780740;139782666	+	139778471	139782666	cassetteExon	ENST00000425687.5	known	1	41.5	0	45;38	0	n	0.97	37.5	1	43;32	1	n	1	36	0	39;33	0	n	0.91	42	4	50;34	4	y	0.92	24.5	2	30;19	2	y	0.85	33	6	40;26	6	y	0.0313472	-4.02158	down	ENSG00000059377.18
known_NIR_7518	chr11	31463305	31469758	-	31463305	31469740	A5SS	ENST00000648582.1	known	0.17	4	19	4	19	y	0.14	3	18	3	18	y	0.14	1	6	1	6	n	0	0	12	0	12	n	0.08	2	24	2	24	y	0	0	18	0	18	n	0.0313585	-4.33052	down	ENSG00000148950.11
known_NIR_50711	chr9	131503073;131504340	131504189;131506403	+	131503073;131506220	131506114;131506403	MXE	ENST00000341012.13	known	0.14	3.5	22	7;0	3;41	n	0.27	7	18.5	14;0	4;33	n	0.24	4	12.5	8;0	4;21	n	0.37	14.5	24.5	29;0	10;39	n	0.38	14	23	23;5	8;38	y	0.52	16	15	28;4	6;24	y	0.0314318	3.31404	up	ENSG00000130714.19
known_NIR_45697	chr7	123551576	123557404	-	123545676	123557404	A3SS	ENST00000618945.4	known	0.2	6	24	6	24	y	0.21	3	11	3	11	y	0.11	1	8	1	8	n	0.36	5	9	5	9	y	0.27	4	11	4	11	y	0.41	7	10	7	10	y	0.0314839	3.34269	up	ENSG00000128609.16
novel_NIR_16048	chr12	57538347	57546028	-	57543182	57546028	3pMXE	ENST00000546559.1	novel	0.25	1	3	1	3	n	0	0	1	0	1	n	0	0	6	0	6	n	0.67	8	4	8	4	y	0.5	1	1	1	1	n	-	-	-	-	-	-	0.0315017	4.21443	up	ENSG00000175203.17
known_NIR_2207	chr1	204073711	204114321	+	204073711;204113134	204112915;204114321	ES	ENST00000367203.8	known	0	0	23	0	24;22	n	0	0	32	0	27;37	n	0	0	26.5	0	19;34	n	0.13	5	33	5	29;37	y	0.13	6	38.5	6	35;42	y	0.07	2	26.5	2	28;25	y	0.031504	5.5	up	ENSG00000143842.15
known_NIR_1462	chr1	156733520	156735725	+	156733520	156734009	3pMXE	ENST00000519086.5	known	0.06	20	297	20	297	y	0.05	18	310	18	310	y	0.04	11	244	11	244	y	0.12	37	284	37	284	y	0.08	24	292	24	292	y	0.1	31	287	31	287	y	0.0315622	3.87298	up	ENSG00000143303.12
known_NIR_3278	chr1	29053312;29060484	29060422;29064982	+	29053312	29064982	cassetteExon	ENST00000647103.1	known	0.08	1	11	1;1	11	n	0.28	9	23	3;15	23	y	0.18	1.5	7	1;2	7	n	0.43	4.5	6	3;6	6	y	0.48	5.5	6	5;6	6	y	0.38	8	13	8;8	13	y	0.0315622	3.87298	up	ENSG00000159023.22
known_NIR_13672	chr12	95031488	95049068	-	95031488;95040597	95040476;95049068	ES	ENST00000333003.10	known	0.16	8	43.5	8	26;61	y	0.17	6	29.5	6	17;42	y	0.15	6	33	6	23;43	y	0.11	6	50	6	51;49	y	0.13	7	46	7	39;53	y	0.09	4	38.5	4	27;50	y	0.0315622	-3.87298	down	ENSG00000120798.17
known_NIR_20482	chr16	74675764;74676425	74676301;74678899	-	74675764	74678899	cassetteExon	ENST00000308807.12	known	0.05	7.5	134	11;4	134	y	0.03	3.5	105	2;5	105	y	0.07	5	70	6;4	70	y	0.09	14	138	16;12	138	y	0.1	12	107	17;7	107	y	0.11	14.5	114	11;18	114	y	0.0315622	3.87298	up	ENSG00000168404.13
novel_NIR_32757	chr19	28611190	28611986	+	28611190	28611912	A3SS	ENST00000651559.1	novel	0.5	20	20	20	20	y	0.5	18	18	18	18	y	0.37	7	12	7	12	y	0.68	15	7	15	7	y	0.79	22	6	22	6	y	0.6	15	10	15	10	y	0.0315787	3.32956	up	ENSG00000266976.3
novel_NIR_27614	chr17	42951894	42955158	-	42951894	42954876	5pMXE	ENST00000592136.5	novel	0.11	10	77	10	77	n	0.23	21	70	21	70	y	0.18	9	41	9	41	y	0.38	29	48	29	48	y	0.28	30	76	30	76	y	0.31	23	51	23	51	y	0.0315939	3.28196	up	ENSG00000266967.7
known_NIR_34810	chr21	33814072	33817231	+	33814072	33818267	A3SS	ENST00000399353.5	known	0.25	3	9	3	9	y	0.3	7	16	7	16	y	0.18	6	28	6	28	y	0.38	12	20	12	20	y	0.35	7	13	7	13	y	0.45	17	21	17	21	y	0.0315939	3.28196	up	ENSG00000205726.15
known_NIR_19679	chr16	57055519	57058972	+	57058148	57058972	5pMXE	ENST00000399221.3	known	0	0	49	0	49	n	0.02	1	51	1	51	n	0.04	2	47	2	47	y	0.05	2	35	2	35	y	0.08	2	24	2	24	y	0.08	4	46	4	46	y	0.0316184	3.27327	up	ENSG00000140853.16
known_NIR_1639	chr1	161169720	161170409	+	161170024	161170409	A5SS	ENST00000541818.1	known	0.19	13	57	13	57	y	0.17	14	70	14	70	y	0.15	10	57	10	57	y	0.11	9	73	9	73	y	0.14	14	83	14	83	y	0.11	8	68	8	68	y	0.0316184	-3.27327	down	ENSG00000143224.18
known_NIR_23868	chr17	75218306	75225342	+	75218306;75225237	75225103;75225342	ES	ENST00000245544.9	known	0.05	13	233	13	238;228	y	0.02	6	294.5	6	283;306	y	0.02	3	196	3	179;213	y	0.06	13	219.5	13	219;220	y	0.1	31	267	31	280;254	y	0.08	23	249	23	242;256	y	0.0316184	3.27327	up	ENSG00000125450.11
known_NIR_36694	chr3	124796817;124809156	124809022;124819739	-	124796817;124817710	124817621;124819739	MXE	ENST00000481591.5	known	0.52	158	146	311;5	12;280	y	0.55	181	146.5	362;0	22;271	n	0.55	170.5	137	335;6	7;267	y	0.47	135	155	268;2	17;293	y	0.49	173	178	342;4	24;332	y	0.51	184	173.5	357;11	10;337	y	0.0316184	-3.27327	down	ENSG00000082781.12
known_NIR_36857	chr3	12901522	12908349	-	12902822	12908349	A3SS&ES	ENST00000273221.8	known	1	7	0	7	0	n	1	22	0	22	0	n	0.86	6	1	6	1	n	0.58	11	8	11	8	y	0.76	13	4	13	4	y	0.76	19	6	19	6	y	0.0317219	-3.33282	down	ENSG00000144711.16
novel_NIR_59583	chr7	32988652	32991222	+	32988652	32994991	A3SS	ENST00000472007.5	novel	0	0	25	0	25	n	0	0	21	0	21	n	0	0	21	0	21	n	0.23	3	10	3	10	y	0.13	2	13	2	13	n	0.25	5	15	5	15	y	0.031746	5.47796	up	ENSG00000122642.11
known_NIR_45949	chr7	13989139	13989563	-	13989464	13989563	3pMXE	ENST00000485475.1	known	0.25	1	3	1	3	n	0.18	3	14	3	14	y	0	0	3	0	3	n	0.5	2	2	2	2	n	0.86	6	1	6	1	n	1	2	0	2	0	n	0.0317526	3.86387	up	ENSG00000006468.14
novel_NIR_65802	chr9	137107662	137108744	+	137107662	137108427	A3SS	ENST00000682117.1	novel	1	10	0	10	0	y	0.75	12	4	12	4	y	0.53	10	9	10	9	y	0.41	7	10	7	10	y	0	0	14	0	14	n	0	0	14	0	14	n	0.0318052	-3.2357	down	ENSG00000177239.16
novel_NIR_68465	chrX	48527285	48528270	+	48527285	48535968	A3SS	ENST00000651615.1	novel	0.4	2	3	2	3	y	0.38	3	5	3	5	y	0.6	6	4	6	4	y	0.8	8	2	8	2	y	0.7	7	3	7	3	y	1	3	0	3	0	y	0.031859	3.31135	up	ENSG00000286268.1
known_NIR_8257	chr11	57673194	57688508	+	57682543	57688508	A5SS&ES	ENST00000527985.5	known	0.06	3	49	3	49	y	0.07	4	56	4	56	y	0.11	6	48	6	48	y	0.01	1	67	1	67	n	0	0	42	0	42	n	0.02	1	50	1	50	n	0.0319026	-4.28661	down	ENSG00000156599.11
known_NIR_48458	chr8	127860093	127890589	+	127796071	127890589	A5SS	ENST00000664139.1	known	0.11	7	56	7	56	y	0.07	4	56	4	56	y	0.06	3	48	3	48	y	0	0	74	0	74	n	0.02	2	84	2	84	y	0.01	1	74	1	74	n	0.0319026	-4.28661	down	ENSG00000249859.12
known_NIR_762	chr1	151027327	151033806	+	151027327	151028786	3pMXE	ENST00000467771.5	known	0.08	3	33	3	33	y	0.32	10	21	10	21	y	0.14	3	19	3	19	y	0.5	9	9	9	9	y	0.56	5	4	5	4	n	0.55	11	9	11	9	y	0.0319037	4.78998	up	ENSG00000143363.17
known_NIR_29351	chr19	55145565	55146681	-	55145565	55146434	5pMXE	ENST00000587089.6	known	0.7	116	50	116	50	y	0.74	139	48	139	48	y	0.68	81	38	81	38	y	0.8	156	40	156	40	y	0.79	111	29	111	29	y	0.78	136	39	136	39	y	0.0319605	4.49013	up	ENSG00000105048.17
novel_NIR_36253	chr2	113584136	113595063	+	113588703	113595063	5pMXE	ENST00000453662.6	novel	0.38	3	5	3	5	y	0.21	4	15	4	15	y	0.25	1	3	1	3	n	0	0	10	0	10	n	0	0	9	0	9	n	0	0	8	0	8	n	0.0319856	-5.45639	down	ENSG00000146556.14
known_NIR_27698	chr19	38390386	38391946	+	38390479	38391946	A5SS	ENST00000586301.5	known	0.5	3	3	3	3	n	0.25	3	9	3	9	y	0.4	2	3	2	3	n	0.09	1	10	1	10	n	0	0	7	0	7	n	0.12	1	7	1	7	n	0.0319994	-3.86338	down	ENSG00000188766.12
novel_NIR_39161	chr2	61017851	61018351	+	61017851	61031419	A3SS	ENST00000295030.6	novel	0.27	4	11	4	11	y	0.16	6	32	6	32	y	0.2	4	16	4	16	y	0	0	18	0	18	n	0.05	2	35	2	35	n	0.12	5	37	5	37	n	0.0320656	-3.23655	down	ENSG00000162928.9
known_NIR_51865	chrX	136147878	136169907	+	136147628	136169907	A5SS	ENST00000651929.2	known	0.06	6	94	6	94	y	0.09	8	83	8	83	y	0.06	4	59	4	59	y	0.03	4	125	4	125	y	0.04	4	99	4	99	y	0.01	2	132	2	132	y	0.0320899	-3.25	down	ENSG00000022267.19
known_NIR_16467	chr14	94081449;94094899	94094750;94096856	+	94081449	94096856	cassetteExon	ENST00000555341.5	known	0.05	4.5	87	1;8	87	n	0.03	3.5	101	4;3	101	y	0.06	3.5	59	4;3	59	y	0.02	1.5	88	0;3	88	n	0	0	49	0;0	49	n	0.01	1	101	2;0	101	n	0.0321988	-3.47851	down	ENSG00000165948.11
known_NIR_23187	chr17	5505977	5517746	-	5501872	5517746	A3SS	ENST00000544378.6	known	0.02	3	192	3	192	y	0.03	6	166	6	166	y	0.04	6	134	6	134	y	0.07	14	182	14	182	y	0.05	9	165	9	165	y	0.08	22	240	22	240	y	0.0321988	3.47851	up	ENSG00000091592.16
known_NIR_22270	chr17	40819208	40833115	+	40819170	40833115	A5SS	ENST00000436612.5	known	0.76	48	15	48	15	y	0.8	66	16	66	16	y	0.82	69	15	69	15	y	0.96	68	3	68	3	y	0.87	67	10	67	10	y	0.89	59	7	59	7	y	0.0323197	3.48833	up	ENSG00000167920.10
novel_NIR_48133	chr3	62250832	62292614	-	62264142	62292614	3pMXE	ENST00000664757.1	novel	-	-	-	-	-	-	0.62	5	3	5	3	y	0.56	5	4	5	4	y	0	0	6	0	6	n	0	0	2	0	2	n	0	0	2	0	2	n	0.0323426	-19.6667	down	ENSG00000241472.7
known_NIR_52959	chrX	73994961	74004270	+	73994961;73998844	73998768;74004270	ES	ENST00000655090.1	known	0.55	11	9	11	6;12	y	0.49	9	9.5	9	8;11	y	0.43	9	12	9	6;18	y	0.2	4	16.5	4	6;27	y	0.17	2	9.5	2	5;14	y	0.36	8	14.5	8	4;25	y	0.0323489	-3.60654	down	ENSG00000225470.8
known_NIR_34877	chr21	39345274	39347247	-	39345274	39345830	A5SS	ENST00000492280.5	known	0.14	21	130	21	130	y	0.15	21	119	21	119	y	0.21	20	75	20	75	y	0.11	16	127	16	127	y	0.06	7	114	7	114	y	0.05	8	151	8	151	y	0.0324317	-3.25493	down	ENSG00000205581.11
known_NIR_844	chr1	151668635	151669141	+	151668635	151683356	A3SS	ENST00000642376.1	known	0.62	5	3	5	3	n	0.64	9	5	9	5	y	0.36	4	7	4	7	y	0.29	2	5	2	5	n	0	0	1	0	1	n	0.14	1	6	1	6	n	0.0324334	-3.22329	down	ENSG00000143376.14
known_NIR_7958	chr11	46381328	46382057	+	46381183	46382057	A5SS	ENST00000405308.6	known	0.1	37	317	37	317	y	0.08	28	328	28	328	y	0.07	18	254	18	254	y	0.11	36	289	36	289	y	0.14	57	340	57	340	y	0.15	53	303	53	303	y	0.0324471	3.3541	up	ENSG00000110492.16
known_NIR_15460	chr14	36300823	36311573	-	36308189	36311573	A3SS&ES	ENST00000621657.4	known	0.05	7	135	7	135	y	0.08	15	163	15	163	y	0.09	9	90	9	90	y	0.11	16	126	16	126	y	0.12	18	129	18	129	y	0.14	18	110	18	110	y	0.0324471	3.3541	up	ENSG00000151332.19
known_NIR_11194	chr12	129111139	129113065	+	129111669	129113065	A5SS	ENST00000512133.6	known	0.79	46	12	46	12	y	0.76	47	15	47	15	y	0.8	35	9	35	9	y	0.83	35	7	35	7	y	0.82	40	9	40	9	y	0.85	46	8	46	8	y	0.0324471	3.3541	up	ENSG00000249196.6
known_NIR_29045	chr19	49812335;49812736	49812447;49812996	-	49812335	49812996	cassetteExon	ENST00000527585.5	known	0.88	29	4	1;57	4	n	1	34.5	0	6;63	0	n	0.84	16	3	1;31	3	n	0.61	22	14	1;43	14	n	0.54	21.5	18	3;40	18	y	0.76	18.5	6	0;37	6	n	0.0325228	-3.34323	down	ENSG00000010361.14
known_NIR_8385	chr11	61430182	61445941	+	61430182	61437625	A3SS&ES	ENST00000536670.5	known	0.06	12	192	12	192	y	0.05	11	216	11	216	y	0.05	10	185	10	185	y	0.14	36	224	36	224	y	0.15	38	210	38	210	y	0.1	31	279	31	279	y	0.0325422	4.90362	up	ENSG00000256591.5
known_NIR_50134	chr9	100442356	100450557	+	100442356;100445237	100444128;100450557	ES	ENST00000489377.1	known	0.92	165	14	165	23;5	y	0.95	181	10.5	181	13;8	y	0.92	98	8	98	10;6	y	0.97	128	4.5	128	9;0	n	0.98	189	3	189	3;3	y	0.98	148	3	148	6;0	n	0.0325729	4.42719	up	ENSG00000066697.15
known_NIR_52401	chrX	3818500	3822073	-	3818500	3818657	A5SS&ES	ENST00000483854.6	known	0	0	31	0	31	n	0.03	1	36	1	36	n	0	0	24	0	24	n	0.06	2	30	2	30	y	0.06	2	34	2	34	y	0.05	2	36	2	36	y	0.0325729	4.42719	up	ENSG00000285756.2
known_NIR_18206	chr15	99256125	99287257	+	99256125	99276576	A3SS&ES	ENST00000331450.9	known	0.28	15	38	15	38	y	0.18	11	50	11	50	y	0.18	8	37	8	37	y	0.11	4	32	4	32	y	0.05	3	58	3	58	y	0.06	2	33	2	33	y	0.0325823	-3.66956	down	ENSG00000168904.15
known_NIR_7912	chr11	45910962	45911899	-	45910962	45913819	A5SS	ENST00000378750.10	known	0.04	17	432	17	432	y	0.02	10	440	10	440	y	0.01	4	383	4	383	y	0.06	26	403	26	403	y	0.07	31	401	31	401	y	0.06	25	381	25	381	y	0.0326719	4.24264	up	ENSG00000121680.16
known_NIR_21354	chr17	15978163	15980243	-	15978163	15981040	A5SS	ENST00000476496.5	known	0.04	6	136	6	136	y	0.02	3	134	3	134	y	0.01	1	100	1	100	n	0.07	8	104	8	104	y	0.06	8	120	8	120	y	0.06	8	130	8	130	y	0.0326719	4.24264	up	ENSG00000214941.8
known_NIR_32004	chr2	28930149	28935521	+	28929710	28935521	A5SS	ENST00000407426.8	known	0.03	6	184	6	184	y	0.06	14	222	14	222	y	0.05	6	112	6	112	y	0.01	2	181	2	181	y	0	0	148	0	148	n	0.01	1	194	1	194	n	0.0326719	-4.24264	down	ENSG00000163811.12
known_NIR_14247	chr13	49663195	49691254	-	49663195;49669846	49669777;49691254	ES	ENST00000242827.11	known	0.13	95	638.5	95	679;598	y	0.1	86	738	86	757;719	y	0.11	63	486	63	552;420	y	0.15	110	626	110	693;559	y	0.15	118	649	118	702;596	y	0.16	120	645	120	668;622	y	0.0326719	4.24264	up	ENSG00000123179.14
known_NIR_19084	chr16	30076475;30081310	30081200;30082484	+	30076475	30082484	cassetteExon	ENST00000563732.5	known	0.86	344	54	30;658	54	y	0.83	394	78	31;757	78	y	0.85	252.5	43	33;472	43	y	0.9	338.5	36	20;657	36	y	0.89	400.5	49	36;765	49	y	0.87	346.5	54	34;659	54	y	0.0326779	3.20713	up	ENSG00000149923.14
known_NIR_36878	chr3	129171538	129171655	-	129171538	129171634	A5SS	ENST00000422453.7	known	0.62	663	410	663	410	y	0.59	596	408	596	408	y	0.6	425	281	425	281	y	0.56	608	484	608	484	y	0.55	507	407	507	407	y	0.58	624	445	624	445	y	0.0326779	-3.20713	down	ENSG00000169714.17
known_NIR_34003	chr20	44582731	44589797	+	44582731;44585204	44585100;44589797	ES	ENST00000372891.7	known	1	71	0	71	0;0	n	0.97	107	3.5	107	2;5	y	0.98	90	2	90	4;0	n	0.94	111	7.5	111	7;8	y	0.96	118	5	118	6;4	y	0.93	100	7.5	100	10;5	y	0.0326779	-3.20713	down	ENSG00000168734.14
novel_NIR_52492	chr5	180441855	180442859	+	180441855	180442730	A3SS	ENST00000507681.2	novel	0.4	6	9	6	9	y	0.2	4	16	4	16	y	0.4	2	3	2	3	y	0	0	13	0	13	n	0	0	17	0	17	n	0.16	5	26	5	26	y	0.0326986	-3.27965	down	ENSG00000250509.2
known_NIR_11667	chr12	405564;409421	409368;411747	+	405564	411747	cassetteExon	ENST00000422000.5	known	0.56	15.5	12	16;15	12	y	0.41	9	13	3;15	13	y	0.38	10.5	17	6;15	17	y	0.74	20	7	16;24	7	y	0.66	9.5	5	7;12	5	y	0.69	9	4	7;11	4	y	0.0327128	4.08597	up	ENSG00000120647.10
known_NIR_21016	chr16	89541384	89544648	+	89542279	89544648	A5SS	ENST00000644498.1	known	0.5	6	6	6	6	y	0.31	5	11	5	11	y	0.5	2	2	2	2	n	0.75	9	3	9	3	y	0.6	6	4	6	4	y	0.8	4	1	4	1	n	0.032806	3.20713	up	ENSG00000197912.16
known_NIR_50458	chr9	128239779	128240427	+	128239779	128242232	A3SS	ENST00000628346.2	known	0.03	3	90	3	90	y	0.04	5	111	5	111	y	0.06	4	61	4	61	y	0	0	128	0	128	n	0.02	2	128	2	128	y	0	0	95	0	95	n	0.032811	-3.31662	down	ENSG00000106976.21
known_NIR_14968	chr14	22905453	22906195	-	22905453;22905659	22905606;22906195	ES	ENST00000359890.8	known	0.14	15	89	15	93;85	y	0.11	11	93.5	11	92;95	y	0.12	15	105	15	104;106	y	0.08	10	116.5	10	107;126	y	0.08	8	97	8	78;116	y	0.1	12	107.5	12	101;114	y	0.032811	-3.31662	down	ENSG00000100461.18
known_NIR_24847	chr17	81908634	81909514	-	81908634;81909037	81908876;81909514	ES	ENST00000538936.7	known	0	1	231	1	304;158	n	0.02	5	248	5	317;179	y	0.03	8	233	8	278;188	y	0.06	15	252.5	15	327;178	y	0.04	10	266.5	10	322;211	y	0.06	14	229.5	14	297;162	y	0.032811	3.31662	up	ENSG00000185813.11
novel_NIR_24716	chr16	67288014	67288489	+	67288014;67288400	67288167;67288489	ES	ENST00000360461.9	novel	0	0	54.5	0	77;32	n	0.03	2	57.5	2	85;30	n	0.09	6	58	6	85;31	n	0.17	9	45.5	9	58;33	y	0.11	7	59.5	7	93;26	n	0.17	11	54.5	11	84;25	y	0.032811	3.31662	up	ENSG00000196155.13
known_NIR_16806	chr15	41231449;41243739	41243667;41256910	+	41231449	41256910	cassetteExon	ENST00000560411.5	known	0.94	64	4	62;66	4	y	0.97	64	2	61;67	2	y	0.96	52.5	2	44;61	2	y	1	43.5	0	39;48	0	n	0.98	65	1	55;75	1	n	1	52.5	0	50;55	0	n	0.032811	3.31662	up	ENSG00000187446.12
known_NIR_21829	chr17	28856582	28857939	+	28856685	28857939	A5SS	ENST00000412138.6	known	0.94	201	13	201	13	y	0.96	235	9	235	9	y	0.97	242	7	242	7	y	0.98	207	5	207	5	y	1	244	0	244	0	n	1	171	0	171	0	n	0.032811	3.31662	up	ENSG00000132591.12
known_NIR_17868	chr15	76310064	76311350	-	76292513	76311350	A3SS	ENST00000560726.5	known	1	5	0	5	0	n	0.6	3	2	3	2	n	1	5	0	5	0	n	0.33	2	4	2	4	n	0.45	5	6	5	6	y	0	0	2	0	2	n	0.0328151	-3.20286	down	ENSG00000140374.16
known_NIR_3689	chr1	38860239	38913540	+	38860239	38875941	3pMXE	ENST00000456813.1	known	0.21	5	19	5	19	y	0.44	4	5	4	5	n	0.33	2	4	2	4	n	0.7	7	3	7	3	y	0.5	10	10	10	10	y	0.64	9	5	9	5	y	0.0328558	3.22073	up	ENSG00000228436.3
known_NIR_1875	chr1	173715078	173716003	+	173715078;173715654	173715523;173716003	ES	ENST00000479505.5	known	0	0	0.5	0	0;1	n	0.25	1	3	1	5;1	n	0	0	3	0	4;2	n	0.44	2	2.5	2	0;5	n	0.62	4	2.5	4	2;3	n	0.33	3	6	3	5;7	y	0.0328651	3.20144	up	ENSG00000076321.11
known_NIR_9287	chr11	68074830	68097019	-	68074830;68081457	68081404;68097019	ES	ENST00000265689.9	known	0.05	1	21	1	28;14	n	0	0	33	0	48;18	n	0.06	1	15.5	1	22;9	n	0.21	5	18.5	5	25;12	y	0.11	2	16	2	21;11	y	0.15	4	23	4	34;12	y	0.0328999	3.48025	up	ENSG00000110721.12
known_NIR_10163	chr12	10364033	10370379	+	10364033	10374035	A3SS	ENST00000663376.1	known	0.24	8	26	8	26	y	0.5	4	4	4	4	n	0.43	10	13	10	13	y	0	0	18	0	18	n	0	0	11	0	11	n	0.19	3	13	3	13	y	0.0329518	-3.25943	down	ENSG00000245648.2
novel_NIR_8145	chr10	5949317	5956379	-	5949240	5956379	A3SS	ENST00000435171.6	novel	0.83	5	1	5	1	y	1	9	0	9	0	y	1	6	0	6	0	y	0.67	6	3	6	3	y	0.65	15	8	15	8	y	0.71	5	2	5	2	y	0.0329739	-4.49325	down	ENSG00000134470.21
known_NIR_26820	chr19	17491197;17492392	17492356;17511343	-	17491197	17511343	cassetteExon	ENST00000596643.5	known	0.5	3	3	0;6	3	n	0.67	10	5	2;18	5	y	0.33	1	2	0;2	2	n	1	4	0	2;6	0	n	0.75	3	1	4;2	1	n	1	1.5	0	1;2	0	n	0.0330031	3.23613	up	ENSG00000269439.6
known_NIR_37056	chr3	139389933	139423016	+	139419680	139423016	A5SS&ES	ENST00000662234.1	known	0.14	2	12	2	12	y	0	0	9	0	9	n	0	0	9	0	9	n	0.26	6	17	6	17	y	0.31	4	9	4	9	y	0.17	4	20	4	20	y	0.03303	3.22097	up	ENSG00000248932.6
known_NIR_47596	chr7	79454244	79454866	+	79454244	79454886	A3SS	ENST00000669576.1	known	0.14	6	36	6	36	y	0.11	4	33	4	33	y	0.04	1	23	1	23	n	0.24	8	25	8	25	y	0.28	13	34	13	34	y	0.41	21	30	21	30	y	0.0330623	3.60028	up	ENSG00000234456.9
known_NIR_46031	chr7	141551434;141593185	141593146;141596562	+	141551434;141555567	141555453;141596562	MXE	ENST00000650365.1	known	0.82	69.5	15	3;136	25;5	y	0.82	64	14	0;128	28;0	n	0.78	54.5	15	0;109	24;6	n	0.87	71.5	11	0;143	20;2	n	0.87	67	10	0;134	20;0	n	0.85	78	13.5	0;156	26;1	n	0.0330996	3.80132	up	ENSG00000006530.18
known_NIR_2286	chr1	20779911	20780350	-	20779911	20780345	A5SS	ENST00000438032.6	known	0.06	2	29	2	29	y	0.08	2	22	2	22	y	0.06	2	30	2	30	y	0.11	4	32	4	32	y	0.15	4	23	4	23	y	0.11	4	32	4	32	y	0.0330996	3.80132	up	ENSG00000127483.19
novel_NIR_67772	chrX	153723288	153724203	-	153723288	153724016	5pMXE	ENST00000416815.5	novel	0.24	7	22	7	22	y	0.15	4	22	4	22	y	0.13	4	26	4	26	n	0.07	2	26	2	26	n	0	0	37	0	37	n	0.03	1	33	1	33	n	0.0331121	-3.54965	down	ENSG00000185825.17
known_NIR_35562	chr22	28744709	28745864	+	28744704	28745864	A5SS	ENST00000216027.8	known	0.26	30	84	30	84	y	0.26	32	89	32	89	y	0.18	17	76	17	76	y	0.35	51	94	51	94	y	0.33	33	68	33	68	y	0.37	53	89	53	89	y	0.0331376	4.01478	up	ENSG00000100209.11
known_NIR_18779	chr16	2521123;2527615	2527561;2528060	+	2521123;2527985	2527773;2528060	MXE	ENST00000563633.5	known	0.64	80	45	154;6	1;89	n	0.62	83	50	165;1	4;96	n	0.61	68.5	44.5	130;7	5;84	y	0.58	81	58	162;0	5;111	n	0.55	70	58	137;3	8;108	y	0.52	71.5	66.5	141;2	5;128	y	0.033138	-3.77297	down	ENSG00000162066.16
known_NIR_40866	chr4	82857764	82862534	-	82857764;82861708	82861631;82862534	ES	ENST00000395310.7	known	0.34	16	31	16	40;22	y	0.33	26	53.5	26	58;49	y	0.4	18	26.5	18	31;22	y	0.51	18	17	18	27;7	y	0.42	25	34.5	25	30;39	y	0.47	24	27	24	31;23	y	0.0331788	3.23592	up	ENSG00000138674.17
known_NIR_41534	chr5	139127853	139133334	-	139127853	139196441	A5SS	ENST00000504666.5	known	0.21	8	30	8	30	y	0.33	11	22	11	22	y	0.38	9	15	9	15	y	0.04	1	26	1	26	n	0.13	4	26	4	26	y	0.12	6	43	6	43	y	0.0331844	-3.62524	down	ENSG00000120725.13
known_NIR_30043	chr2	111247558	111248148	-	111208661	111248148	A3SS	ENST00000659458.1	known	0.33	3	6	3	6	n	0.54	7	6	7	6	y	0.67	2	1	2	1	n	1	2	0	2	0	n	0.91	10	1	10	1	n	-	-	-	-	-	-	0.0332029	4.05966	up	ENSG00000172965.17
novel_NIR_55038	chr6	26158559	26158858	+	26158559	26170975	A3SS	ENST00000289316.2	novel	0.12	9	64	9	64	n	0.13	11	76	11	76	n	0.1	4	36	4	36	n	0.2	17	69	17	69	y	0.18	14	65	14	65	y	0.15	12	70	12	70	y	0.0332046	3.53009	up	ENSG00000158373.8
known_NIR_5274	chr10	113692070	113697494	+	113679349	113697494	A5SS	ENST00000621345.4	known	0	0	16	0	16	n	0.23	3	10	3	10	y	0.15	2	11	2	11	y	0.36	4	7	4	7	y	0.71	12	5	12	5	y	0.56	9	7	9	7	y	0.0332351	3.42241	up	ENSG00000165806.21
known_NIR_806	chr1	151316509	151326172	-	151307801	151326172	A3SS	ENST00000430800.5	known	1	69	0	69	0	n	0.95	138	7	138	7	y	1	59	0	59	0	n	0.9	77	9	77	9	y	0.93	63	5	63	5	y	0.91	106	10	106	10	y	0.0332575	-3.71231	down	ENSG00000143393.17
known_NIR_39357	chr3	9751949	9756471	+	9751949;9754885	9754704;9756471	ES	ENST00000302003.11	known	0.07	9	126.5	9	85;168	y	0.11	17	142.5	17	95;190	y	0.06	8	116.5	8	110;123	y	0.03	4	110.5	4	76;145	y	0.02	3	130	3	101;159	y	0	0	136.5	0	107;166	n	0.0333003	-3.59066	down	ENSG00000114026.22
known_NIR_43089	chr5	90475020	90485535	+	90475020	90485525	A3SS	ENST00000399107.6	known	0.31	11	25	11	25	y	0.39	13	20	13	20	y	0.48	12	13	12	13	y	0.63	19	11	19	11	y	0.62	28	17	28	17	y	0.54	20	17	20	17	y	0.0333646	3.58204	up	ENSG00000113356.13
known_NIR_19468	chr16	4514664	4538325	-	4514664	4538702	A5SS	ENST00000567695.6	known	0	0	15	0	15	n	0	0	23	0	23	n	0.09	2	20	2	20	y	0.19	6	26	6	26	y	0.19	6	26	6	26	y	0.18	4	18	4	18	y	0.0334073	5.19028	up	ENSG00000089486.17
known_NIR_17407	chr15	65155856	65156778	-	65155856	65156844	A5SS	ENST00000300107.7	known	0.05	6	104	6	104	y	0.04	7	154	7	154	y	0.08	6	72	6	72	y	0.02	2	130	2	130	y	0	0	90	0	90	n	0	0	118	0	118	n	0.0334587	-3.63803	down	ENSG00000166855.9
known_NIR_11704	chr12	438554;440996	440617;441774	+	438554	441774	cassetteExon	ENST00000537286.1	known	0.83	74.5	15	59;90	15	y	0.91	104.5	10	87;122	10	y	0.89	50	6	29;71	6	y	0.95	80.5	4	75;86	4	y	0.99	73	1	47;99	1	n	0.99	71.5	1	33;110	1	n	0.0334587	3.63803	up	ENSG00000120647.10
novel_NIR_54756	chr6	159790060	159790940	+	159789888	159790940	A5SS	ENST00000476826.5	novel	0.97	111	4	111	4	y	0.99	110	1	110	1	y	0.97	107	3	107	3	y	0.94	120	8	120	8	y	0.94	134	9	134	9	y	0.96	142	6	142	6	y	0.0334717	-3.18198	down	ENSG00000112110.10
novel_NIR_37657	chr2	219179763	219180167	+	219179763	219180198	A3SS	ENST00000273048.2	novel	0.18	2	9	2	9	y	0.2	2	8	2	8	y	-	-	-	-	-	-	0	0	6	0	6	n	0	0	9	0	9	n	0	0	6	0	6	n	0.0334754	-19	down	ENSG00000144567.11
novel_NIR_53502	chr5	78564871	78626563	-	78564871	78648499	A5SS	ENST00000503686.5	novel	-	-	-	-	-	-	0	0	3	0	3	n	0.1	1	9	1	9	n	1	1	0	1	0	n	-	-	-	-	-	-	1	5	0	5	0	y	0.0334754	19	up	ENSG00000145685.14
known_NIR_43122	chr5	91311032	91313078	-	91312413	91313078	A3SS&ES	ENST00000649447.2	known	0.25	2	6	2	6	n	0	0	2	0	2	n	0.29	2	5	2	5	n	0.55	6	5	6	5	y	0.67	4	2	4	2	n	0.44	7	9	7	9	y	0.0334878	3.32007	up	ENSG00000248323.7
novel_NIR_45014	chr3	125084052	125084310	-	125084052	125107481	A5SS	ENST00000465475.5	novel	1	5	0	5	0	y	0.73	8	3	8	3	y	0.89	8	1	8	1	y	0	0	9	0	9	n	0.3	7	16	7	16	y	0.5	4	4	4	4	y	0.0335004	-3.67471	down	ENSG00000221955.11
novel_NIR_55034	chr6	26124633;26127761	26127698;26138054	+	26124633	26138054	cassetteExon	ENST00000602637.1	novel	0.39	22.5	35	18;27	35	y	0.48	28.5	31	17;40	31	y	0.28	6.5	17	5;8	17	y	0.57	23	17	1;45	17	n	0.79	15	4	0;30	4	n	0.63	26	15	7;45	15	y	0.0336418	3.20015	up	ENSG00000180573.10
known_NIR_26730	chr19	17060089	17062698	-	17060092	17062698	A3SS	ENST00000253669.10	known	0.1	13	120	13	120	y	0.13	16	108	16	108	y	0.09	9	88	9	88	y	0.15	16	94	16	94	y	0.2	22	90	22	90	y	0.16	17	92	17	92	y	0.0336672	3.25847	up	ENSG00000131351.15
known_NIR_31722	chr2	241500796;241501799	241501478;241508006	-	241500796	241508006	cassetteExon	ENST00000405883.7	known	0.94	121.5	8	243;0	8	n	0.9	175	20	350;0	20	n	0.93	139.5	10	278;1	10	n	0.89	136	17	269;3	17	y	0.84	151	29	302;0	29	n	0.85	126.5	23	249;4	23	y	0.0336672	-3.25847	down	ENSG00000115694.15
known_NIR_51772	chrX	123603748	123610918	-	123601338	123610918	A3SS	ENST00000448128.5	known	0.18	22	100	22	100	y	0.13	22	149	22	149	y	0.14	13	79	13	79	y	0.08	16	175	16	175	y	0.11	15	123	15	123	y	0.07	16	199	16	199	y	0.0336672	-3.25847	down	ENSG00000125676.20
known_NIR_30497	chr2	174358536	174378923	-	174351725	174378923	A3SS	ENST00000342016.8	known	0.25	6	18	6	18	y	0.24	10	31	10	31	y	0.15	3	17	3	17	y	0.03	1	38	1	38	n	0.12	4	29	4	29	y	0.09	4	40	4	40	y	0.0337147	-3.22329	down	ENSG00000138433.16
known_NIR_19208	chr16	30759444	30760284	-	30759458	30760284	A3SS	ENST00000544613.5	known	0.83	5	1	5	1	n	1	1	0	1	0	n	0.5	3	3	3	3	n	0.2	2	8	2	8	y	0.33	2	4	2	4	n	0	0	1	0	1	n	0.0337704	-3.42129	down	ENSG00000196118.12
novel_NIR_37017	chr2	186636207	186636544	+	186636207	186637065	A3SS	ENST00000261023.8	novel	0.89	8	1	8	1	y	0.71	10	4	10	4	y	0.67	6	3	6	3	y	0.17	2	10	2	10	y	0	0	3	0	3	n	0.45	15	18	15	18	y	0.0337894	-3.72602	down	ENSG00000138448.12
known_NIR_23113	chr17	5354490;5356573	5356508;5361208	+	5354490	5361208	cassetteExon	ENST00000537505.6	known	0	0	13	0;0	13	n	0	0	22	0;0	22	n	0	0	5	0;0	5	n	0.21	3.5	13	3;4	13	y	0.11	2.5	20	5;0	20	n	0.21	6.5	25	8;5	25	y	0.033805	5.3	up	ENSG00000029725.17
known_NIR_19311	chr16	3384941;3393814	3393649;3397192	-	3384941	3397192	cassetteExon	ENST00000618425.4	known	0.82	4.5	1	2;7	1	n	0.71	10	4	2;18	4	y	1	1	0	0;2	0	n	0.06	1	15	0;2	15	n	0.37	3.5	6	1;6	6	n	0.5	4	4	0;8	4	n	0.0338235	-3.42997	down	ENSG00000140987.20
novel_NIR_57295	chr7	103347781	103348009	+	103347781	103361957	A3SS	ENST00000679250.1	novel	0	0	8	0	8	n	0.1	1	9	1	9	n	0.4	4	6	4	6	y	0.5	2	2	2	2	y	1	7	0	7	0	y	0.85	11	2	11	2	y	0.0338614	3.23271	up	ENSG00000161057.13
known_NIR_6440	chr10	97446353;97450536	97450357;97451671	+	97446353	97451671	cassetteExon	ENST00000370854.7	known	0.12	14	106	7;21	106	y	0.17	15.5	76	14;17	76	y	0.12	13	96	6;20	96	y	0.21	20	74	16;24	74	y	0.27	35	97	32;38	97	y	0.2	24.5	98	22;27	98	y	0.0338704	3.27423	up	ENSG00000171307.19
novel_NIR_22444	chr15	90902975	90903231	+	90902975	90904190	A3SS	ENST00000560451.5	novel	0.17	3	15	3	15	y	-	-	-	-	-	-	0	0	1	0	1	n	0.67	8	4	8	4	y	0.67	2	1	2	1	y	0.82	9	2	9	2	y	0.0338986	6.43916	up	ENSG00000196547.15
novel_NIR_62830	chr8	143567888	143569441	-	143567888	143568552	5pMXE	ENST00000533083.1	novel	0.5	2	2	2	2	y	0.33	2	4	2	4	y	-	-	-	-	-	-	1	2	0	2	0	y	1	5	0	5	0	y	0.8	8	2	8	2	y	0.0339077	4.79826	up	ENSG00000204839.9
known_NIR_36136	chr22	44714671	44726577	+	44725292	44726577	5pMXE	ENST00000495250.2	known	0	0	38	0	38	n	0	0	65	0	65	n	0	0	52	0	52	n	0.06	2	30	2	30	y	0.05	3	58	3	58	y	0.03	2	72	2	72	y	0.0339082	5.2915	up	ENSG00000248405.10
known_NIR_42897	chr5	75359511	75359985	+	75359556	75359985	A5SS	ENST00000511206.5	known	0.05	6	110	6	110	y	0.06	6	96	6	96	y	0.03	2	57	2	57	y	0	0	97	0	97	n	0	0	91	0	91	n	0	0	116	0	116	n	0.0339082	-5.2915	down	ENSG00000113161.17
novel_NIR_683	chr1	1267992	1273051	-	1267992	1273499	A5SS	ENST00000360466.6	novel	0.3	6	14	6	14	y	0.25	7	21	7	21	y	0.15	2	11	2	11	y	0	0	7	0	7	n	0	0	7	0	7	n	0	0	31	0	31	n	0.0339082	-5.2915	down	ENSG00000160087.21
novel_NIR_49273	chr4	152780091;152809238	152809190;152809673	+	152780091;152807248	152807204;152809673	MXE	ENST00000510831.5	novel	1	3.5	0	0;7	0;0	n	1	1.5	0	0;3	0;0	n	1	2	0	0;4	0;0	n	0.17	0.5	2.5	0;1	0;5	n	0.5	2	2	2;2	2;2	y	0	0	3.5	0;0	2;5	n	0.03391	-5.29136	down	ENSG00000164144.16
known_NIR_23776	chr17	74737365	74740768	+	74736731	74740768	A5SS	ENST00000528438.5	known	1	2	0	2	0	n	-	-	-	-	-	-	1	1	0	1	0	n	0.6	3	2	3	2	n	0.8	8	2	8	2	y	0.67	2	1	2	1	n	0.0339194	-5.29059	down	ENSG00000172794.20
known_NIR_36104	chr22	42161358	42169847	-	42161358;42168736	42168609;42169847	ES	ENST00000677622.1	known	0.68	77	37	77	68;6	y	0.74	81	29	81	49;9	y	0.73	70	26.5	70	41;12	y	0.77	86	25.5	86	44;7	y	0.82	106	22.5	106	28;17	y	0.79	87	23	87	31;15	y	0.0339484	3.25269	up	ENSG00000100207.21
novel_NIR_60231	chr7	56078508	56078942	+	56078508	56079353	A3SS	ENST00000447501.5	novel	0.44	15	19	15	19	y	0.36	24	42	24	42	y	0.46	21	25	21	25	y	0.31	13	29	13	29	y	0.26	11	31	11	31	y	0.31	9	20	9	20	y	0.0339716	-3.63974	down	ENSG00000129103.19
known_NIR_8387	chr11	61430182;61437848	61437625;61445941	+	61430182	61445941	cassetteExon	ENST00000542074.1	known	0.89	97.5	12	192;3	12	y	0.91	108	11	216;0	11	n	0.9	92.5	10	185;0	10	n	0.76	113	36	224;2	36	y	0.73	105	38	210;0	38	n	0.82	140	31	279;1	31	n	0.0339883	-4.80057	down	ENSG00000167985.7
known_NIR_10707	chr12	11839304	11840461	+	11839304	11853427	A3SS	ENST00000396373.9	known	0	0	9	0	9	n	0	0	11	0	11	n	0	0	7	0	7	n	0.14	3	19	3	19	y	0.07	1	14	1	14	n	0.12	2	14	2	14	y	0.0339969	5.28423	up	ENSG00000139083.11
novel_NIR_14219	chr12	132822311	132824919	-	132822311	132828327	A5SS	ENST00000204726.8	novel	0	0	9	0	9	n	0.25	3	9	3	9	y	0	0	6	0	6	n	0.5	2	2	2	2	y	1	1	0	1	0	n	0.62	10	6	10	6	n	0.034013	3.61966	up	ENSG00000090615.15
known_NIR_31297	chr2	230511166	230539267	+	230511166	230515095	3pMXE	ENST00000264052.9	known	0.45	10	12	10	12	y	0.5	11	11	11	11	y	0.45	9	11	9	11	y	0.36	5	9	5	9	y	0.22	5	18	5	18	y	0.29	11	27	11	27	y	0.0340536	-4.04121	down	ENSG00000067066.17
novel_NIR_27779	chr17	44207911	44209376	-	44207911	44208619	A5SS&ES	ENST00000529947.1	novel	0.67	6	3	6	3	y	1	1	0	1	0	n	1	6	0	6	0	y	0.35	9	17	9	17	y	0	0	13	0	13	n	0.5	4	4	4	4	y	0.0340834	-3.28796	down	ENSG00000108312.15
known_NIR_51997	chrX	152753623	152753788	-	152751428	152753788	A3SS	ENST00000598543.5	known	0.5	2	2	2	2	n	0.4	4	6	4	6	y	0.25	1	3	1	3	n	0	0	5	0	5	n	-	-	-	-	-	-	0	0	2	0	2	n	0.0340908	-5.27656	down	ENSG00000268606.6
novel_NIR_6187	chr1	8874917	8876350	-	8874917	8878812	A5SS	ENST00000489867.2	novel	0	0	2	0	2	n	0.2	1	4	1	4	n	0.5	3	3	3	3	y	1	1	0	1	0	n	1	2	0	2	0	y	-	-	-	-	-	-	0.0340908	5.27656	up	ENSG00000074800.16
novel_NIR_56058	chr6	42965789	42966525	-	42965789	42966504	A5SS	ENST00000244546.4	novel	0.4	2	3	2	3	y	0.25	1	3	1	3	n	0.5	2	2	2	2	y	0	0	5	0	5	n	0	0	6	0	6	n	-	-	-	-	-	-	0.0340908	-5.27656	down	ENSG00000124587.14
novel_NIR_61218	chr7	95394736	95395861	-	95394714	95395861	A3SS	ENST00000475439.1	novel	-	-	-	-	-	-	0	0	12	0	12	n	0	0	6	0	6	n	1	1	0	1	0	n	0.5	2	2	2	2	y	0.8	4	1	4	1	y	0.0340908	5.27656	up	ENSG00000105852.11
novel_NIR_63252	chr8	144887810	144889581	-	144882836	144889581	A3SS	ENST00000533221.5	novel	0	0	2	0	2	n	0	0	4	0	4	n	-	-	-	-	-	-	0.8	4	1	4	1	y	0.5	2	2	2	2	y	1	1	0	1	0	n	0.0340908	5.27656	up	ENSG00000196150.14
known_NIR_14390	chr13	99859049	99864818	+	99859049;99863092	99862991;99864818	ES	ENST00000376355.7	known	0	0	50.5	0	42;59	n	0	0	54	0	65;43	n	0	0	25.5	0	30;21	n	0.07	4	53.5	4	49;58	y	0.08	5	61	5	63;59	y	0.04	3	70	3	63;77	y	0.0341757	5.26965	up	ENSG00000125246.15
known_NIR_46568	chr7	26191650	26192495	-	26174782	26192495	A3SS	ENST00000679318.1	known	1	15	0	15	0	n	1	12	0	12	0	n	1	6	0	6	0	n	0.83	19	4	19	4	y	0.86	12	2	12	2	y	0.74	14	5	14	5	y	0.0341757	-5.26965	down	ENSG00000122566.22
novel_NIR_56833	chr7	100049841;100050836	100050628;100056911	+	100049841;100051610	100051478;100056911	MXE	ENST00000438937.1	novel	0.36	2.5	4.5	0;5	1;8	n	0.5	6.5	6.5	0;13	0;13	n	0.55	3	2.5	0;6	1;4	n	0.22	3	10.5	0;6	1;20	n	0.15	2.5	14.5	0;5	1;28	n	0.32	3.5	7.5	2;5	2;13	y	0.0342107	-3.18821	down	ENSG00000166529.15
known_NIR_37779	chr3	191559754	191569600	+	191568341	191569600	5pMXE	ENST00000667184.1	known	0.76	47	15	47	15	y	0.75	36	12	36	12	y	0.71	40	16	40	16	y	0.8	37	9	37	9	y	0.89	39	5	39	5	y	0.85	53	9	53	9	y	0.0342142	3.53381	up	ENSG00000223812.8
known_NIR_36978	chr3	134552012;134559429	134559150;134561377	+	134552012	134561377	cassetteExon	ENST00000332047.10	known	0.02	1.5	62	2;1	62	n	0	0	40	0;0	40	n	0.05	1.5	29	0;3	29	n	0.1	4.5	40	5;4	40	y	0.11	2	17	0;4	17	n	0.06	4	66	0;8	66	n	0.034228	3.16228	up	ENSG00000182923.20
novel_NIR_66003	chr9	21994068	21994547	-	21994068	21994821	A5SS	ENST00000470819.2	novel	0	0	7	0	7	n	-	-	-	-	-	-	0	0	2	0	2	n	0.44	4	5	4	5	y	0.25	2	6	2	6	y	0.5	4	4	4	4	y	0.0342423	5.26425	up	ENSG00000147889.18
novel_NIR_32756	chr19	28611190	28611973	+	28611190	28611912	A3SS	ENST00000651559.1	novel	0.58	28	20	28	20	y	0.57	24	18	24	18	y	0.7	28	12	28	12	y	0.76	22	7	22	7	y	0.84	31	6	31	6	y	0.76	32	10	32	10	y	0.0342483	3.43063	up	ENSG00000266976.3
known_NIR_33180	chr20	17957037	17968700	-	17957037	17961140	5pMXE	ENST00000483485.5	known	0.26	10	29	10	29	y	0.07	3	43	3	43	y	0.33	5	10	5	10	y	0.46	18	21	18	21	y	0.67	26	13	26	13	y	0.5	17	17	17	17	y	0.0343584	3.20497	up	ENSG00000089006.17
known_NIR_44688	chr6	44219782	44227260	+	44219782	44227263	A3SS	ENST00000393844.7	known	0.05	3	55	3	55	y	0	0	37	0	37	n	0	0	37	0	37	n	0.1	5	47	5	47	y	0.06	2	30	2	30	y	0.12	4	30	4	30	y	0.0343595	3.15929	up	ENSG00000112759.19
novel_NIR_38228	chr2	241680319	241685771	-	241680319	241682799	A5SS&ES	ENST00000420144.1	novel	0	0	9	0	9	n	0	0	10	0	10	n	0.44	4	5	4	5	y	1	6	0	6	0	y	-	-	-	-	-	-	0.75	3	1	3	1	y	0.0344088	3.77948	up	ENSG00000168393.13
known_NIR_3117	chr1	26286037	26296919	-	26286037	26300926	A5SS	ENST00000314675.11	known	0.56	5	4	5	4	n	0.5	5	5	5	5	y	0.67	2	1	2	1	n	1	2	0	2	0	n	0.75	6	2	6	2	n	1	4	0	4	0	n	0.0344416	3.50269	up	ENSG00000158062.20
known_NIR_39629	chr4	105700014;105708162	105707919;105708638	-	105700014	105708638	cassetteExon	ENST00000451321.6	known	0.1	2	18	2;2	18	y	0.11	3.5	29	7;0	29	n	0	0	20	0;0	20	n	0.26	3.5	10	7;0	10	n	0.23	3.5	12	6;1	12	n	0.16	2.5	13	5;0	13	n	0.0344844	3.1921	up	ENSG00000138785.15
known_NIR_17399	chr15	64983593	64988619	-	64983593	64989169	A5SS	ENST00000558765.5	known	0	0	3	0	3	n	0.29	2	5	2	5	n	0	0	1	0	1	n	0.62	5	3	5	3	n	0.5	1	1	1	1	n	0.36	4	7	4	7	y	0.0344987	3.23997	up	ENSG00000090487.11
known_NIR_22294	chr17	41771862	41786503	-	41771862	41785903	5pMXE	ENST00000449889.5	known	-	-	-	-	-	-	0	0	7	0	7	n	0.17	2	10	2	10	y	1	7	0	7	0	n	0.67	4	2	4	2	n	0.5	1	1	1	1	n	0.0345487	3.76341	up	ENSG00000173801.17
novel_NIR_54461	chr6	142632672	142637713	-	142544993	142637713	A3SS	ENST00000447311.1	novel	-	-	-	-	-	-	1	8	0	8	0	y	1	1	0	1	0	n	0.5	4	4	4	4	y	0.1	1	9	1	9	n	0	0	4	0	4	n	0.0345784	-5.23723	down	ENSG00000236366.3
known_NIR_2237	chr1	206393673	206401424	+	206393673	206401421	A3SS	ENST00000573034.8	known	0	0	6	0	6	n	0	0	1	0	1	n	0	0	1	0	1	n	1	1	0	1	0	n	0.77	10	3	10	3	y	0.5	2	2	2	2	n	0.0345843	5.23676	up	ENSG00000266028.8
novel_NIR_29879	chr17	81189975	81190650	-	81189975	81190639	A5SS	ENST00000374782.7	novel	0.07	6	77	6	77	n	0.04	1	23	1	23	n	0	0	53	0	53	n	0.2	10	41	10	41	y	0.17	10	50	10	50	y	0.1	5	46	5	46	n	0.0346564	3.34252	up	ENSG00000141577.14
known_NIR_28271	chr19	43596585	43597097	+	43596585	43597094	A3SS	ENST00000391965.6	known	0.14	1	6	1	6	n	0.22	4	14	4	14	y	0.18	2	9	2	9	y	0.29	8	20	8	20	y	0.44	4	5	4	5	n	0.35	7	13	7	13	y	0.0347292	3.64898	up	ENSG00000124444.16
novel_NIR_27477	chr17	41828863	41830801	-	41827626	41830801	A3SS	ENST00000393910.5	novel	0.04	1	25	1	25	n	0.07	2	27	2	27	n	0	0	18	0	18	n	0.21	6	23	6	23	y	0.11	4	31	4	31	n	0.22	7	25	7	25	y	0.0347316	3.53458	up	ENSG00000141698.17
known_NIR_16358	chr14	89955970	89963108	+	89956800	89963108	A5SS&ES	ENST00000554976.5	known	0	0	6	0	6	n	0	0	16	0	16	n	0	0	5	0	5	n	0.19	4	17	4	17	y	0.29	2	5	2	5	n	0.38	3	5	3	5	n	0.0347431	5.22413	up	ENSG00000042088.14
known_NIR_18056	chr15	88904162	88905757	-	88901671	88905757	A3SS	ENST00000558029.5	known	0.2	2	8	2	8	y	0.36	5	9	5	9	y	0.25	1	3	1	3	n	0.6	6	4	6	4	y	1	5	0	5	0	n	1	2	0	2	0	n	0.0347687	4.2179	up	ENSG00000140545.15
known_NIR_49489	chr8	38238209	38242250	+	38240364	38242250	5pMXE	ENST00000532106.1	known	0	0	21	0	21	n	0	0	16	0	16	n	0.08	1	11	1	11	n	0.25	4	12	4	12	y	0.12	3	21	3	21	y	0.17	4	19	4	19	y	0.0347691	3.31115	up	ENSG00000085788.14
known_NIR_11290	chr12	132861634	132869619	-	132861634	132872285	A5SS	ENST00000443047.6	known	0.9	43	5	43	5	y	0.84	26	5	26	5	y	0.89	16	2	16	2	y	0.96	53	2	53	2	y	1	37	0	37	0	n	0.93	53	4	53	4	y	0.0347872	3.15296	up	ENSG00000072609.18
known_NIR_30034	chr2	111208977	111344061	-	111239996	111344061	A3SS&ES	ENST00000673798.1	known	0	0	4	0	4	n	0	0	2	0	2	n	0	0	1	0	1	n	1	1	0	1	0	n	0.57	4	3	4	3	n	0.6	6	4	6	4	y	0.0348117	5.2187	up	ENSG00000172965.17
known_NIR_8443	chr11	62433891;62491831	62491732;62535003	-	62433891	62535003	cassetteExon	ENST00000530124.5	known	0.94	83.5	5	91;76	5	y	0.96	94.5	4	107;82	4	y	0.99	71	1	94;48	1	n	0.91	103.5	10	117;90	10	y	0.86	95	16	118;72	16	y	0.91	85	8	113;57	8	y	0.0348757	-3.16587	down	ENSG00000124942.14
known_NIR_9286	chr11	68074830	68097019	-	68074830	68081404	5pMXE	ENST00000533910.5	known	0.03	1	28	1	28	n	0	0	48	0	48	n	0.04	1	22	1	22	n	0.17	5	25	5	25	y	0.09	2	21	2	21	y	0.11	4	34	4	34	y	0.0349382	3.72104	up	ENSG00000110721.12
known_NIR_49653	chr8	50658663	50704605	+	50658663	50704600	A3SS	ENST00000518864.5	known	0	0	24	0	24	n	0	0	22	0	22	n	0	0	12	0	12	n	0.12	3	23	3	23	y	0.24	4	13	4	13	y	0.22	5	18	5	18	y	0.0349404	5.20855	up	ENSG00000147481.17
known_NIR_43944	chr6	30201138	30213305	-	30204765	30213305	A3SS&ES	ENST00000434785.5	known	0.12	5	36	5	36	y	0.11	11	92	11	92	y	0.07	5	62	5	62	y	0.19	15	66	15	66	y	0.14	8	51	8	51	y	0.2	13	53	13	53	y	0.0349761	3.18953	up	ENSG00000234127.9
novel_NIR_9661	chr11	1240375	1252343	+	1240375;1251743	1240851;1252343	ES	ENST00000529681.5	novel	0.18	8	36.5	8	1;72	y	0.11	4	32.5	4	6;59	n	0.23	8	26.5	8	4;49	y	0.02	1	41	1	10;72	n	0.05	2	37.5	2	0;75	n	0	0	24.5	0	0;49	n	0.0349888	-3.97748	down	ENSG00000117983.17
novel_NIR_2625	chr1	19597109	19615939	+	19597109	19597834	3pMXE	ENST00000498067.1	novel	0.25	1	3	1	3	n	0.46	6	7	6	7	y	0.5	2	2	2	2	y	0	0	5	0	5	n	0	0	4	0	4	n	0	0	3	0	3	n	0.0350214	-5.2022	down	ENSG00000173436.15
known_NIR_40244	chr4	2255294	2257982	-	2255351	2257982	A3SS	ENST00000513380.1	known	0.58	22	16	22	16	y	0.75	24	8	24	8	y	0.56	5	4	5	4	n	0.46	6	7	6	7	y	0.33	6	12	6	12	y	0.37	11	19	11	19	y	0.0350404	-3.40364	down	ENSG00000123933.17
novel_NIR_53461	chr5	77437420	77438240	-	77436394	77438240	A3SS	ENST00000511630.6	novel	0.6	3	2	3	2	y	-	-	-	-	-	-	0.67	2	1	2	1	n	0	0	6	0	6	n	-	-	-	-	-	-	0	0	2	0	2	n	0.0350538	-18.1429	down	ENSG00000164253.14
known_NIR_14406	chr14	100298885	100306199	-	100305776	100306199	3pMXE	ENST00000556844.1	known	1	53	0	53	0	n	1	69	0	69	0	n	1	60	0	60	0	n	0.92	45	4	45	4	y	0.96	88	4	88	4	y	0.94	61	4	61	4	y	0.0350987	-5.19615	down	ENSG00000197119.13
known_NIR_17254	chr15	60386086;60396427	60396151;60397943	-	60386086;60397338	60390213;60397943	MXE	ENST00000678870.1	known	0.08	19.5	238.5	33;6	85;392	y	0.08	23.5	258	39;8	96;420	y	0.08	14.5	178.5	26;3	62;295	y	0.04	10	225.5	18;2	80;371	y	0.06	14.5	243.5	25;4	57;430	y	0.05	15.5	278	26;5	119;437	y	0.0350987	-5.19615	down	ENSG00000182718.18
known_NIR_47359	chr7	73538013	73543548	-	73538013	73539882	5pMXE	ENST00000493671.5	known	0.05	24	472	24	472	y	0.07	35	467	35	467	y	0.06	21	358	21	358	y	0.03	16	541	16	541	y	0.03	18	525	18	525	y	0.03	14	524	14	524	y	0.0350987	-5.19615	down	ENSG00000106635.8
known_NIR_3520	chr1	32806611;32810766	32810591;32817188	-	32806611	32817188	cassetteExon	ENST00000674629.1	known	0.97	256.5	7	513;0	7	n	0.95	334	16	664;4	16	y	0.96	225.5	10	449;2	10	y	0.99	343	4	682;4	4	y	0.99	362.5	4	723;2	4	y	0.99	351.5	3	703;0	3	n	0.0350987	5.19615	up	ENSG00000134684.12
known_NIR_5982	chr10	68919981	68934799	+	68919981;68934360	68934199;68934799	ES	ENST00000373585.8	known	0.04	7	150	7	139;161	y	0.03	4	151	4	133;169	y	0.02	2	85.5	2	93;78	y	0	0	114.5	0	108;121	n	0	0	119	0	105;133	n	0	0	162.5	0	156;169	n	0.0350987	-5.19615	down	ENSG00000107625.14
known_NIR_7944	chr11	46366984	46367291	+	46347820	46367291	A5SS	ENST00000527911.5	known	0	0	97	0	97	n	0	0	91	0	91	n	0	0	85	0	85	n	0.04	3	70	3	70	y	0.02	2	89	2	89	y	0.03	3	91	3	91	y	0.0350987	5.19615	up	ENSG00000149091.15
known_NIR_11691	chr12	42355222	42387456	+	42355222;42375074	42374863;42387456	ES	ENST00000613154.4	known	0.02	2	117.5	2	219;16	y	0.03	5	147.5	5	262;33	y	0.04	3	76	3	132;20	y	0	0	121	0	222;20	n	0	0	91	0	156;26	n	0	0	138.5	0	237;40	n	0.0350987	-5.19615	down	ENSG00000134283.18
known_NIR_30406	chr2	161179761;161202979	161202863;161203487	+	161179761	161203487	cassetteExon	ENST00000259075.6	known	0	0	59	0;0	59	n	0	0	60	0;0	60	n	0	0	55	0;0	55	n	0.04	3.5	84	3;4	84	y	0.03	2.5	73	4;1	73	n	0.02	1.5	71	3;0	71	n	0.0350987	5.19615	up	ENSG00000136560.14
known_NIR_31531	chr2	238069477	238081709	+	238064469	238081709	A5SS	ENST00000413463.6	known	0.99	150	1	150	1	n	1	130	0	130	0	n	0.98	101	2	101	2	y	0.96	134	6	134	6	y	0.96	185	7	185	7	y	0.96	178	8	178	8	y	0.0350987	-5.19615	down	ENSG00000132330.18
known_NIR_32930	chr2	86529397	86563304	-	86529397	86542252	5pMXE	ENST00000466032.1	known	0.02	3	164	3	164	y	0.03	6	234	6	234	y	0.04	6	143	6	143	y	0.06	16	234	16	234	y	0.06	12	201	12	201	y	0.06	16	240	16	240	y	0.0350987	5.19615	up	ENSG00000115561.16
novel_NIR_43697	chr22	36233455	36236596	-	36233455	36239136	A5SS	ENST00000529194.5	novel	1	7	0	7	0	y	1	16	0	16	0	y	1	7	0	7	0	y	0.83	10	2	10	2	y	0.82	14	3	14	3	y	0.7	7	3	7	3	y	0.035209	-5.18756	down	ENSG00000128335.14
known_NIR_43887	chr6	2959342	2971248	-	2959342	2971491	A5SS	ENST00000380546.7	known	0.52	25	23	25	23	y	0.64	28	16	28	16	y	0.5	20	20	20	20	y	0.27	13	36	13	36	y	0.31	15	34	15	34	y	0.44	22	28	22	28	y	0.035236	-3.1646	down	ENSG00000124570.21
novel_NIR_44667	chr3	111990773	111991377	+	111990751	111991377	A5SS	ENST00000494817.1	novel	0	0	8	0	8	n	0.1	1	9	1	9	n	0.33	3	6	3	6	y	0.55	6	5	6	5	y	1	10	0	10	0	y	0.6	9	6	9	6	y	0.0352526	3.31999	up	ENSG00000144827.9
known_NIR_26285	chr19	12609202;12609974	12609870;12610564	-	12609202	12610564	cassetteExon	ENST00000311437.11	known	0.16	1.5	8	2;1	8	n	0.38	10.5	17	13;8	17	y	0.45	5	6	2;8	6	y	0.6	3	2	3;3	2	n	1	6.5	0	7;6	0	n	1	4.5	0	3;6	0	n	0.0352562	3.36661	up	ENSG00000188033.10
known_NIR_28816	chr19	49355419	49357252	-	49355419;49355970	49355959;49357252	ES	ENST00000598810.5	known	0.68	52	24.5	52	22;27	y	0.63	57	33.5	57	34;33	y	0.71	59	24.5	59	25;24	y	0.75	55	18.5	55	18;19	y	0.82	38	8.5	38	8;9	y	0.87	121	17.5	121	18;17	y	0.0352975	3.34134	up	ENSG00000074219.14
known_NIR_10313	chr12	108567743	108568831	+	108568016	108568831	A5SS&ES	ENST00000540154.5	known	0.57	4	3	4	3	n	0.45	9	11	9	11	y	0.33	1	2	1	2	n	0.76	13	4	13	4	y	0.8	4	1	4	1	n	0.63	22	13	22	13	y	0.0353885	3.24763	up	ENSG00000136003.16
known_NIR_43885	chr6	2959342	2971117	-	2959342	2968779	A5SS&ES	ENST00000616722.4	known	0.9	35	4	35	4	y	0.95	80	4	80	4	y	0.96	48	2	48	2	y	0.74	31	11	31	11	y	0.82	33	7	33	7	y	0.85	58	10	58	10	y	0.035418	-3.53553	down	ENSG00000124570.21
known_NIR_43959	chr6	30326995	30328909	+	30326995	30328889	A3SS	ENST00000376656.8	known	0.75	6	2	6	2	n	0.6	3	2	3	2	n	-	-	-	-	-	-	0.33	8	16	8	16	y	0	0	2	0	2	n	0.29	2	5	2	5	n	0.0354377	-3.65305	down	ENSG00000204599.14
novel_NIR_1137	chr1	151843308	151844045	+	151842031	151844045	A5SS	ENST00000434182.1	novel	0.22	6	21	6	21	y	0.3	18	43	18	43	y	0.25	13	39	13	39	y	0.16	9	47	9	47	y	0.09	3	29	3	29	n	0.18	8	37	8	37	y	0.0354386	-3.15682	down	ENSG00000234614.1
novel_NIR_66600	chr9	75080941	75083087	-	75077580	75083087	A3SS	ENST00000361092.9	novel	0.09	2	20	2	20	n	0.13	3	20	3	20	n	0	0	6	0	6	n	0.17	4	20	4	20	y	0.25	7	21	7	21	n	0.29	5	12	5	12	n	0.0355224	3.1305	up	ENSG00000106733.21
known_NIR_7081	chr11	12980909;12984338	12984226;12986040	-	12980909	12986040	cassetteExon	ENST00000662291.1	known	0.41	16.5	24	16;17	24	y	0.35	16.5	31	16;17	31	y	0.45	14.5	18	13;16	18	y	0.25	11	33	12;10	33	y	0.3	14	33	19;9	33	y	0.31	17	38	20;14	38	y	0.0355706	-3.38358	down	ENSG00000251381.8
known_NIR_38470	chr3	48298523;48300634	48300277;48301353	-	48298523	48301353	cassetteExon	ENST00000451657.6	known	0.08	3	35	0;6	35	n	0.14	6	36	6;6	36	y	0.16	6	32	5;7	32	y	0.03	1.5	53	0;3	53	n	0	0	37	0;0	37	n	0.06	2	31	1;3	31	n	0.0356298	-3.26275	down	ENSG00000172113.10
known_NIR_18054	chr15	88899532	88901551	-	88899532;88899811	88899656;88901551	ES	ENST00000268150.13	known	0.33	302	622.5	302	720;525	y	0.32	273	582	273	731;433	y	0.33	254	510.5	254	650;371	y	0.34	283	552	283	730;374	y	0.36	338	596	338	823;369	y	0.35	366	667.5	366	906;429	y	0.0356527	3.5	up	ENSG00000140545.15
known_NIR_32692	chr2	74135658	74145189	-	74135658;74142360	74142272;74145189	ES	ENST00000327428.10	known	0.14	325	1916.5	325	2473;1360	y	0.13	315	2054.5	315	2616;1493	y	0.13	240	1585.5	240	2011;1160	y	0.1	222	1975.5	222	2495;1456	y	0.12	274	1974	274	2554;1394	y	0.11	251	2104	251	2661;1547	y	0.0356527	-3.5	down	ENSG00000163170.12
known_NIR_33495	chr20	34031604;34065160	34065044;34072066	+	34031604	34072066	cassetteExon	ENST00000375114.7	known	0.09	66	655	38;94	655	y	0.08	62	753	53;71	753	y	0.07	53	654	33;73	654	y	0.06	48	736	29;67	736	y	0.06	60.5	873	38;83	873	y	0.05	41	792	32;50	792	y	0.0356527	-3.5	down	ENSG00000125970.12
novel_NIR_39815	chr2	85596649	85597104	+	85596649;85596931	85596857;85597104	ES	ENST00000443647.5	novel	0.17	169	835.5	169	130;1541	y	0.17	195	985	195	136;1834	y	0.18	169	783	169	121;1445	y	0.16	173	909.5	173	137;1682	y	0.15	173	999.5	173	174;1825	y	0.14	163	1023.5	163	152;1895	n	0.0356527	-3.5	down	ENSG00000168894.10
known_NIR_7956	chr11	46381288	46382057	+	46381183	46382057	A5SS	ENST00000405308.6	known	0.04	14	317	14	317	y	0.04	15	328	15	328	y	0.02	6	254	6	254	y	0.1	33	289	33	289	y	0.08	30	340	30	340	y	0.06	20	303	20	303	y	0.0356527	3.5	up	ENSG00000110492.16
known_NIR_13172	chr12	6578917	6580278	-	6578917	6581038	A5SS	ENST00000357008.7	known	0	0	101	0	101	n	0.01	1	132	1	132	n	0.01	1	76	1	76	n	0.03	3	83	3	83	y	0.02	2	131	2	131	y	0.04	4	95	4	95	y	0.0356527	3.5	up	ENSG00000111642.16
known_NIR_14935	chr14	22774116	22775444	-	22774116;22774503	22774354;22775444	ES	ENST00000674313.1	known	0.01	3	257	3	311;203	y	0.02	4	243	4	313;173	y	0.02	4	219.5	4	253;186	y	0.04	11	262.5	11	331;194	y	0.05	15	297.5	15	410;185	y	0.03	7	243	7	298;188	y	0.0356527	3.5	up	ENSG00000155465.20
known_NIR_20896	chr16	88714926	88715182	+	88714926;88715106	88715048;88715182	ES	ENST00000564105.5	known	0.03	20	583	20	558;608	y	0.04	27	605.5	27	567;644	y	0.05	29	559.5	29	530;589	y	0.02	14	659.5	14	620;699	y	0.01	8	630.5	8	588;673	y	0.02	13	617.5	13	562;673	y	0.0356527	-3.5	down	ENSG00000174177.13
known_NIR_20897	chr16	88714926	88715182	+	88715106	88715182	5pMXE	ENST00000562011.1	known	0.03	20	608	20	608	y	0.04	27	644	27	644	y	0.05	29	589	29	589	y	0.02	14	699	14	699	y	0.01	8	673	8	673	y	0.02	13	673	13	673	y	0.0356527	-3.5	down	ENSG00000174177.13
known_NIR_34329	chr20	50940933;50941209	50941105;50945737	-	50940933;50942126	50942031;50945737	MXE	ENST00000371588.10	known	0.07	39	491.5	76;2	534;449	y	0.06	26.5	423.5	51;2	443;404	y	0.06	19.5	287.5	39;0	288;287	n	0.05	26	491	46;6	517;465	y	0.04	16	368.5	32;0	391;346	n	0.03	15.5	446.5	29;2	468;425	y	0.0356527	-3.5	down	ENSG00000000419.14
known_NIR_36495	chr3	11426926	11510185	+	11426926	11554811	A3SS	ENST00000354956.9	known	0.04	20	440	20	440	y	0.04	16	374	16	374	y	0.05	15	300	15	300	y	0.03	12	365	12	365	y	0.01	4	455	4	455	y	0.02	10	422	10	422	y	0.0356527	-3.5	down	ENSG00000197548.12
known_NIR_39757	chr4	1238337	1248916	-	1238337	1241325	A5SS&ES	ENST00000515399.5	known	0.05	12	234	12	234	y	0.04	11	260	11	260	y	0.03	6	210	6	210	y	0.02	6	264	6	264	y	0.02	6	236	6	236	y	0.01	2	226	2	226	y	0.0356527	-3.5	down	ENSG00000159692.16
known_NIR_41716	chr5	141629306	141629860	-	141629306;141629739	141629684;141629860	ES	ENST00000469550.6	known	0.01	4	269	4	279;259	y	0.01	4	268.5	4	299;238	y	0	0	223.5	0	232;215	n	0.02	6	308.5	6	337;280	y	0.03	8	247	8	269;225	y	0.04	10	271.5	10	282;261	y	0.0356527	3.5	up	ENSG00000171720.10
known_NIR_45870	chr7	134418219	134432314	-	134418974	134432314	A3SS	ENST00000663723.1	known	0.03	4	133	4	133	y	0.03	4	117	4	117	y	0.04	4	90	4	90	y	0.02	2	122	2	122	y	0.01	1	118	1	118	n	0	0	127	0	127	n	0.0356527	-3.5	down	ENSG00000273297.2
known_NIR_47464	chr7	74555223	74557639	+	74555223;74555494	74555393;74557639	ES	ENST00000265755.7	known	0.04	5	123	5	69;177	y	0.04	6	130	6	58;202	y	0.03	3	101.5	3	68;135	y	0.07	10	134.5	10	103;166	y	0.06	6	102.5	6	58;147	y	0.05	6	120	6	69;171	y	0.0356527	3.5	up	ENSG00000006704.11
known_NIR_12716	chr12	56224441	56224834	+	56223712	56224834	A5SS	ENST00000447747.5	known	0.96	100	4	100	4	y	0.98	127	3	127	3	y	0.97	87	3	87	3	y	0.99	160	2	160	2	y	0.99	154	1	154	1	n	1	155	0	155	0	n	0.0356527	3.5	up	ENSG00000139579.13
known_NIR_26233	chr19	11507562;11507729	11507702;11507991	-	11507562	11507991	cassetteExon	ENST00000588998.5	known	1	143.5	0	287;0	0	n	0.99	166.5	1	330;3	1	n	0.99	155	2	308;2	2	y	0.98	131	2	262;0	2	n	0.96	161.5	6	323;0	6	n	0.97	153.5	5	307;0	5	n	0.0356527	-3.5	down	ENSG00000130159.14
known_NIR_34321	chr20	50936262;50941209	50940865;50945737	-	50936262;50942126	50942031;50945737	MXE	ENST00000683466.1	known	0.61	381.5	243	761;2	37;449	y	0.61	330.5	211.5	659;2	19;404	y	0.62	238	148.5	476;0	10;287	n	0.58	347	250	688;6	35;465	y	0.59	272.5	190	545;0	34;346	n	0.6	346	231	690;2	37;425	y	0.0356527	-3.5	down	ENSG00000000419.14
known_NIR_42952	chr5	7889275	7891372	+	7890412	7891372	5pMXE	ENST00000507414.1	known	0.96	170	8	170	8	y	0.97	147	4	147	4	y	0.97	88	3	88	3	y	1	152	0	152	0	n	0.99	169	2	169	2	y	0.98	128	2	128	2	y	0.0356527	3.5	up	ENSG00000124275.15
novel_NIR_27741	chr17	44084675	44086572	-	44084675;44085155	44085022;44086572	ES	ENST00000225983.10	novel	0.18	11	48.5	11	46;51	y	0.17	12	60.5	12	55;66	y	0.1	6	51.5	6	45;58	n	0.02	1	47	1	54;40	n	0.04	2	51.5	2	52;51	n	0.03	2	64	2	74;54	n	0.035665	-4.64758	down	ENSG00000108840.16
known_NIR_43118	chr5	91311032	91313078	-	91311032	91312295	5pMXE	ENST00000650047.1	known	0.29	2	5	2	5	n	0	0	8	0	8	n	0.17	2	10	2	10	y	0.5	6	6	6	6	y	0.4	4	6	4	6	y	0.7	7	3	7	3	y	0.035712	3.11773	up	ENSG00000248323.7
known_NIR_48440	chr8	127796071;127816884	127816828;127890589	+	127796071	127890589	cassetteExon	ENST00000664139.1	known	0.15	9.5	56	5;14	56	y	0.1	6	56	4;8	56	y	0.14	8	48	8;8	48	y	0.03	2	74	0;4	74	n	0.09	8.5	84	4;13	84	y	0.05	4	74	0;8	74	n	0.0357322	-3.14286	down	ENSG00000249859.12
known_NIR_24850	chr17	81908634;81908996	81908876;81909514	-	81908634	81909514	cassetteExon	ENST00000576343.5	known	0.99	154	1	304;4	1	n	0.97	161	5	317;5	5	y	0.95	139.5	8	278;1	8	n	0.92	165.5	15	327;4	15	y	0.94	161	10	322;0	10	n	0.91	148.5	14	297;0	14	n	0.0357875	-3.21182	down	ENSG00000185813.11
known_NIR_4183	chr1	45591270	45594694	+	45591270	45606482	A3SS	ENST00000537798.5	known	0.7	7	3	7	3	y	0.75	6	2	6	2	n	0.55	6	5	6	5	y	0.33	3	6	3	6	n	0.33	2	4	2	4	n	0	0	2	0	2	n	0.0358527	-3.56353	down	ENSG00000132780.17
known_NIR_9443	chr11	72229558	72229924	+	72229558	72229663	3pMXE	ENST00000537656.1	known	0.08	3	34	3	34	y	0.07	2	28	2	28	y	0.05	2	37	2	37	y	0.04	2	45	2	45	y	0	0	42	0	42	n	0	0	26	0	26	n	0.035864	-3.33623	down	ENSG00000165458.14
known_NIR_16205	chr14	88024669;88025481	88025407;88079104	+	88024669	88079104	cassetteExon	ENST00000658103.1	known	0.61	9.5	6	18;1	6	n	0.8	12	3	18;6	3	y	0.68	12.5	6	17;8	6	y	1	11.5	0	17;6	0	n	1	2.5	0	5;0	0	n	0.83	10	2	17;3	2	y	0.035878	3.11045	up	ENSG00000258867.6
known_NIR_40924	chr4	8446590	8449669	+	8446590	8449698	A3SS	ENST00000513449.6	known	0.84	27	5	27	5	y	0.89	17	2	17	2	y	0.82	14	3	14	3	y	0.91	29	3	29	3	y	1	26	0	26	0	n	1	13	0	13	0	n	0.035949	3.28634	up	ENSG00000155275.19
known_NIR_45513	chr7	106775200;106776022	106775959;106777542	+	106775200	106777542	cassetteExon	ENST00000602761.2	known	0.32	16	34	30;2	34	y	0.21	10.5	39	19;2	39	y	0.29	10	24	19;1	24	n	0.39	23.5	36	43;4	36	y	0.4	20	30	39;1	30	n	0.44	26	33	40;12	33	y	0.0360703	3.77436	up	ENSG00000228742.11
known_NIR_2376	chr1	213167973	213230497	+	213167973	213176400	A3SS&ES	ENST00000615329.4	known	0	0	7	0	7	n	0	0	9	0	9	n	-	-	-	-	-	-	0.5	3	3	3	3	n	0.36	5	9	5	9	y	0.25	3	9	3	9	y	0.0361663	5.11461	up	ENSG00000136643.12
novel_NIR_9327	chr11	113363927	113364621	+	113363927	113364835	A3SS	ENST00000529221.6	novel	0.12	2	14	2	14	n	0.07	2	25	2	25	n	0	0	34	0	34	n	0.22	6	21	6	21	y	0.15	4	23	4	23	y	0.25	7	21	7	21	y	0.0362068	3.1361	up	ENSG00000149292.17
known_NIR_37464	chr3	179323291	179327561	+	179325322	179327561	5pMXE	ENST00000466264.5	known	0.24	10	32	10	32	y	0.24	7	22	7	22	y	0.38	8	13	8	13	y	0.11	5	42	5	42	y	0.1	3	28	3	28	y	0.05	2	39	2	39	y	0.0363215	-3.98234	down	ENSG00000121864.10
novel_NIR_1470	chr1	155169857	155170009	-	155169857	155172351	A5SS	ENST00000463527.5	novel	0.12	2	15	2	15	n	0	0	15	0	15	n	0.25	4	12	4	12	y	0.4	6	9	6	9	y	0.56	9	7	9	7	y	0.8	4	1	4	1	y	0.0364036	3.38622	up	ENSG00000163463.13
novel_NIR_13064	chr12	109561329	109561416	-	109561329	109561420	A5SS	ENST00000537496.5	novel	0.04	1	27	1	27	n	0.07	3	38	3	38	n	0	0	28	0	28	n	0.09	4	39	4	39	n	0.15	6	35	6	35	y	0.12	7	49	7	49	n	0.0365383	3.125	up	ENSG00000139428.12
known_NIR_37405	chr3	165511651	165521760	+	165511651	165539065	A3SS	ENST00000655586.1	known	0.52	14	13	14	13	y	0.43	18	24	18	24	y	0.5	11	11	11	11	y	0.32	8	17	8	17	y	0.41	11	16	11	16	y	0.37	23	40	23	40	y	0.0365545	-3.09359	down	ENSG00000244128.7
known_NIR_22563	chr17	44155411	44161871	+	44155411;44157941	44157833;44161871	ES	ENST00000319977.8	known	0.23	19	64	19	69;59	y	0.18	15	67.5	15	60;75	y	0.16	13	66.5	13	48;85	y	0.1	8	72	8	53;91	y	0.09	8	80.5	8	85;76	y	0.13	9	60.5	9	56;65	y	0.0365638	-3.46688	down	ENSG00000125319.15
known_NIR_33191	chr20	17970370	17988166	+	17975903	17988166	A5SS&ES	ENST00000377709.1	known	0.07	14	179	14	179	y	0.09	14	147	14	147	y	0.08	10	109	10	109	y	0.06	11	188	11	188	y	0.03	4	156	4	156	y	0.03	6	174	6	174	y	0.0366415	-3.4641	down	ENSG00000125871.14
known_NIR_48531	chr8	127989291;127995228	127994883;128009590	+	127989291	128009590	cassetteExon	ENST00000667305.1	known	0.11	19	148	33;5	148	y	0.08	17	193	34;0	193	n	0.08	12	147	24;0	147	n	0.05	10.5	206	21;0	206	n	0.06	10.5	156	17;4	156	y	0.04	10	229	20;0	229	n	0.0366415	-3.4641	down	ENSG00000249859.12
known_NIR_16040	chr14	74713552	74714872	+	74713620	74714872	A5SS	ENST00000554590.5	known	1	54	0	54	0	n	0.97	56	2	56	2	y	0.97	34	1	34	1	n	0.95	40	2	40	2	y	0.94	49	3	49	3	y	0.93	40	3	40	3	y	0.0366415	-3.4641	down	ENSG00000119616.11
known_NIR_42528	chr5	32586501	32588512	+	32571174	32588512	A5SS	ENST00000512913.5	known	0.09	11	113	11	113	y	0.07	6	77	6	77	y	0.03	2	66	2	66	y	0.18	20	94	20	94	y	0.11	10	84	10	84	y	0.18	15	68	15	68	y	0.0367196	3.1909	up	ENSG00000113387.12
known_NIR_41076	chr5	103259186	103265908	+	103258896	103265908	A5SS	ENST00000319933.7	known	0.5	9	9	9	9	y	0.55	6	5	6	5	y	0.38	5	8	5	8	y	0.34	10	19	10	19	y	0.25	3	9	3	9	y	0.24	4	13	4	13	y	0.0368632	-3.3541	down	ENSG00000181751.10
known_NIR_50065	chr8	95025205	95035454	+	95025205;95032094	95031995;95035454	ES	ENST00000396124.9	known	0.07	3	37	3	40;34	y	0	0	52	0	62;42	n	0	0	22.5	0	31;14	n	0.19	8	34.5	8	44;25	y	0.14	5	32	5	54;10	y	0.09	3	31.5	3	45;18	y	0.0368645	3.14309	up	ENSG00000156170.13
novel_NIR_55870	chr6	36443111	36479121	+	36443111	36443418	3pMXE	ENST00000443316.2	novel	0	0	2	0	2	n	-	-	-	-	-	-	0	0	4	0	4	n	0.89	8	1	8	1	y	-	-	-	-	-	-	1	1	0	1	0	n	0.0370102	17.1818	up	ENSG00000112078.14
novel_NIR_60807	chr7	75772254	75792076	-	75772254	75789717	5pMXE	ENST00000394905.2	novel	0	0	2	0	2	n	0.11	1	8	1	8	n	-	-	-	-	-	-	1	1	0	1	0	n	-	-	-	-	-	-	1	2	0	2	0	y	0.0370102	17.1818	up	ENSG00000006606.9
novel_NIR_68186	chrX	2960420	2961326	-	2960420	2968149	A5SS	ENST00000540563.6	novel	1	1	0	1	0	n	1	1	0	1	0	n	1	2	0	2	0	y	0.11	1	8	1	8	n	0	0	1	0	1	n	-	-	-	-	-	-	0.0370102	-17.1818	down	ENSG00000157399.17
known_NIR_11361	chr12	15957033;15958335	15958240;15959829	+	15957033	15959829	cassetteExon	ENST00000526521.5	known	0.98	104.5	2	1;208	2	n	0.98	103.5	2	2;205	2	y	1	98.5	0	10;187	0	n	0.93	121	9	1;241	9	n	0.9	116.5	13	2;231	13	y	0.95	122.5	6	5;240	6	y	0.0370313	-3.75326	down	ENSG00000023697.13
novel_NIR_30688	chr18	26657483	26703392	-	26689971	26703392	3pMXE	ENST00000579458.1	novel	0.06	2	33	2	33	n	0	0	37	0	37	n	0.07	2	25	2	25	n	0.14	4	24	4	24	n	0.18	7	32	7	32	y	0.27	9	24	9	24	y	0.0370777	3.46738	up	ENSG00000265369.3
novel_NIR_4355	chr1	28508905	28510649	+	28508905	28529858	A3SS	ENST00000398958.6	novel	0.62	5	3	5	3	y	0.64	7	4	7	4	y	0.53	9	8	9	8	y	0.8	20	5	20	5	y	1	9	0	9	0	y	0.8	4	1	4	1	y	0.0371496	3.61161	up	ENSG00000180198.17
novel_NIR_17598	chr13	44146855	44153647	+	44146855	44238828	A3SS	ENST00000437867.6	novel	0	0	43	0	43	n	0.04	2	48	2	48	n	0.08	4	46	4	46	n	0.15	8	45	8	45	y	0.21	13	50	13	50	y	0.11	7	55	7	55	n	0.0372063	3.14309	up	ENSG00000227258.6
known_NIR_35289	chr22	20052584;20056013	20055943;20063338	+	20052584;20061683	20061530;20063338	MXE	ENST00000401886.5	known	0.38	22.5	37.5	43;2	6;69	y	0.36	19.5	34	36;3	4;64	y	0.39	18	28	35;1	5;51	n	0.47	33	36.5	61;5	2;71	y	0.44	27	34	51;3	4;64	y	0.52	26	24	47;5	2;46	y	0.0372115	4.00892	up	ENSG00000183597.16
known_NIR_13231	chr12	6653050;6653396	6653230;6663065	-	6653050;6656798	6656727;6663065	MXE	ENST00000619641.4	known	0.69	82.5	36.5	162;3	12;61	y	0.74	100.5	35.5	201;0	13;58	n	0.73	78.5	29	153;4	8;50	y	0.62	84	52	165;3	19;85	y	0.66	91	47	182;0	14;80	n	0.57	70.5	54	141;0	24;84	n	0.0372449	-3.42338	down	ENSG00000111653.20
novel_NIR_2193	chr1	169855857	169859041	-	169854964	169859041	A3SS	ENST00000367771.11	novel	0	0	6	0	6	n	0	0	22	0	22	n	0	0	13	0	13	n	0.11	1	8	1	8	n	0.12	2	14	2	14	n	0.2	3	12	3	12	y	0.0372866	5.03277	up	ENSG00000000457.14
novel_NIR_46421	chr3	187447757	187449251	+	187448890	187449251	5pMXE	ENST00000440726.1	novel	0	0	6	0	6	n	0	0	16	0	16	n	0	0	11	0	11	n	0.2	3	12	3	12	y	0.11	2	16	2	16	n	0.12	1	7	1	7	n	0.0372866	5.03277	up	ENSG00000228952.1
known_NIR_50714	chr9	131503073;131506453	131506114;131508911	+	131503073;131504340	131504189;131508911	MXE	ENST00000678942.2	known	0.42	2.5	3.5	3;2	7;0	n	0.46	6	7	4;8	14;0	n	0.33	2	4	4;0	8;0	n	0.26	5	14.5	10;0	29;0	n	0.26	4	11.5	8;0	23;0	n	0.21	4	15	6;2	28;2	y	0.037324	-3.81867	down	ENSG00000130714.19
novel_NIR_10989	chr11	59797396	59800778	+	59797396	59799675	3pMXE	ENST00000530221.1	novel	1	1	0	1	0	n	0.71	10	4	10	4	y	0.73	8	3	8	3	y	0.25	1	3	1	3	n	0.41	7	10	7	10	y	0.57	4	3	4	3	y	0.0373564	-3.06846	down	ENSG00000166900.17
known_NIR_44339	chr6	32166266	32166498	+	32166232	32166498	A5SS	ENST00000422437.5	known	0.38	3	5	3	5	n	0.5	7	7	7	7	y	0	0	2	0	2	n	0.67	2	1	2	1	n	1	2	0	2	0	n	1	2	0	2	0	n	0.0373781	3.19796	up	ENSG00000258388.7
novel_NIR_17057	chr13	106534690	106534843	-	106512812	106534843	A3SS	ENST00000646441.1	novel	0.12	3	21	3	21	n	0.14	2	12	2	12	n	0.21	3	11	3	11	y	0.37	10	17	10	17	y	0.25	5	15	5	15	y	0.28	5	13	5	13	y	0.037396	3.17	up	ENSG00000125266.8
known_NIR_43359	chr6	111592094;111601306	111601196;111605776	-	111592094	111605776	cassetteExon	ENST00000368761.11	known	0.04	2	55	2;2	55	y	0.08	5.5	67	9;2	67	y	0.03	1.5	49	2;1	49	n	0.1	4	36	4;4	36	y	0.12	7	53	11;3	53	y	0.12	8.5	63	9;8	63	y	0.03755	3.8	up	ENSG00000056972.20
known_NIR_45685	chr7	12211547	12214809	+	12211425	12214809	A5SS	ENST00000420833.5	known	0.14	3	18	3	18	y	0	0	40	0	40	n	0.09	1	10	1	10	n	0.38	5	8	5	8	y	0.26	7	20	7	20	y	0.53	19	17	19	17	y	0.0375537	3.55287	up	ENSG00000106460.19
known_NIR_43710	chr6	161108859;161109041	161108951;161109755	+	161108859	161109755	cassetteExon	ENST00000366919.6	known	0.05	3.5	72	1;6	72	n	0.03	1	29	0;2	29	n	0	0	26	0;0	26	n	0.11	3.5	27	1;6	27	n	0.07	3	37	5;1	37	n	0.14	5	31	6;4	31	y	0.0375748	3.20713	up	ENSG00000085511.20
known_NIR_44018	chr6	30707454	30711412	-	30707454;30708357	30707566;30711412	ES	ENST00000376406.8	known	0.62	13	8	13	10;6	y	0.54	11	9.5	11	4;15	y	0.67	12	6	12	11;1	n	0.16	3	15.5	3	12;19	y	0.43	6	8	6	5;11	y	0.29	7	17.5	7	3;32	y	0.037579	-3.65385	down	ENSG00000137337.15
novel_NIR_45428	chr3	133819820	133821171	+	133819820	133825392	A3SS	ENST00000466636.1	novel	0.43	10	13	10	13	y	0.64	9	5	9	5	y	0.68	13	6	13	6	y	0.36	13	23	13	23	y	0	0	14	0	14	n	0.15	4	23	4	23	y	0.037582	-3.17844	down	ENSG00000144867.13
known_NIR_17017	chr15	49292537;49319116	49318972;49319604	+	49292537	49319604	cassetteExon	ENST00000327171.7	known	0.1	6	53	3;9	53	y	0.12	5	35	4;6	35	y	0.08	4	46	0;8	46	n	0.07	3.5	50	2;5	50	y	0.03	1.5	47	0;3	47	n	0.05	3.5	65	3;4	65	y	0.0375901	-3.06186	down	ENSG00000156958.15
known_NIR_173	chr1	109629490	109630233	+	109629490;109629916	109629796;109630233	ES	ENST00000531734.6	known	0.09	14	140.5	14	129;152	y	0.05	8	168.5	8	150;187	y	0.07	10	135	10	126;144	y	0.04	8	181.5	8	179;184	y	0	0	185	0	174;196	n	0.02	4	206.5	4	203;210	y	0.0375901	-3.06186	down	ENSG00000116337.20
novel_NIR_59752	chr7	43648652;43650712	43650616;43665658	-	43648652	43665658	cassetteExon	ENST00000438444.5	novel	0.23	5	17	8;2	17	y	0.07	2	25	4;0	25	n	0.15	5.5	30	9;2	30	y	0.28	14.5	38	16;13	38	y	0.41	8.5	12	17;0	12	n	0.32	14	30	28;0	30	n	0.0376123	3.10632	up	ENSG00000106603.20
novel_NIR_28736	chr17	64482999	64483964	-	64482999	64483390	A5SS&ES	ENST00000671755.1	novel	0.14	1	6	1	6	n	0.1	1	9	1	9	n	0	0	4	0	4	n	0.25	2	6	2	6	y	0.5	1	1	1	1	n	0.5	8	8	8	8	y	0.0376259	3.61406	up	ENSG00000256525.8
known_NIR_9436	chr11	72111496	72112274	-	72111496	72112650	A5SS	ENST00000543587.5	known	0.03	3	109	3	109	y	0.02	2	89	2	89	y	0.05	4	77	4	77	y	0.16	17	88	17	88	y	0.09	10	101	10	101	y	0.11	10	85	10	85	y	0.0377101	3.83349	up	ENSG00000110200.8
known_NIR_49968	chr8	81715114	81718182	-	81715114;81717288	81717249;81718182	ES	ENST00000220669.10	known	0.55	248	200	248	227;173	y	0.54	237	199.5	237	231;168	y	0.59	180	124	180	136;112	y	0.52	211	197	211	215;179	y	0.49	205	210	205	232;188	y	0.49	255	265.5	255	284;247	y	0.0377249	-3.28634	down	ENSG00000104231.11
known_NIR_35317	chr22	20118313	20119013	+	20117912	20119013	A5SS	ENST00000421656.5	known	0.95	74	4	74	4	y	0.9	69	8	69	8	y	0.91	68	7	68	7	y	1	67	0	67	0	n	0.97	66	2	66	2	y	0.97	107	3	107	3	y	0.0377249	3.28634	up	ENSG00000099901.17
known_NIR_2663	chr1	228109021	228109149	-	228109021	228109261	A5SS	ENST00000295008.8	known	0.87	308	46	308	46	y	0.87	287	42	287	42	y	0.88	295	40	295	40	y	0.89	318	40	318	40	y	0.89	334	41	334	41	y	0.89	274	35	274	35	y	0.0377496	5	up	ENSG00000162910.19
known_NIR_11695	chr12	42384996	42387456	+	42355222	42387456	A5SS	ENST00000551723.5	known	0.99	180	2	180	2	y	0.98	262	5	262	5	y	0.98	137	3	137	3	y	1	227	0	227	0	n	1	220	0	220	0	n	1	237	0	237	0	n	0.0377496	5	up	ENSG00000134283.18
known_NIR_16104	chr14	75985840	75988885	+	75985840;75986308	75986126;75988885	ES	ENST00000679083.1	known	0.97	84	2.5	84	0;5	n	0.97	83	2.5	83	0;5	n	0.96	110	4	110	0;8	n	0.95	91	5	91	8;2	y	0.95	126	6	126	6;6	y	0.95	82	4	82	1;7	n	0.0377496	-5	down	ENSG00000119650.13
known_NIR_20207	chr16	67846985	67865102	+	67847566	67865102	5pMXE	ENST00000568396.2	known	1	637	3	637	3	y	1	746	1	746	1	n	1	525	0	525	0	n	0.98	686	13	686	13	y	0.98	700	12	700	12	y	0.99	777	10	777	10	y	0.0377496	-5	down	ENSG00000102898.12
known_NIR_34584	chr20	63196734	63202287	-	63196734	63213864	A5SS	ENST00000370334.4	known	0.98	211	5	211	5	y	0.98	321	6	321	6	y	0.99	222	3	222	3	y	1	247	0	247	0	n	1	225	0	225	0	n	1	217	0	217	0	n	0.0377496	5	up	ENSG00000149658.18
known_NIR_41646	chr5	140647924	140648471	+	140647309	140648471	A5SS	ENST00000513256.5	known	1	221	0	221	0	n	1	186	0	186	0	n	1	139	0	139	0	n	0.98	189	4	189	4	y	0.99	147	2	147	2	y	0.98	239	5	239	5	y	0.0377496	-5	down	ENSG00000113141.18
known_NIR_47653	chr7	866067	869349	+	866067	886056	A3SS	ENST00000457861.1	known	0.99	145	2	145	2	y	0.98	117	2	117	2	y	0.98	110	2	110	2	y	1	137	0	137	0	n	1	107	0	107	0	n	1	112	0	112	0	n	0.0377496	5	up	ENSG00000164828.18
known_NIR_48419	chr8	127794734;127939676	127939508;127989162	+	127794734	127989162	cassetteExon	ENST00000657693.1	known	1	73	0	1;145	0	n	1	77	0	10;144	0	n	1	68.5	0	0;137	0	n	0.98	90.5	2	5;176	2	y	0.99	80	1	5;155	1	n	0.98	103	2	3;203	2	y	0.0377496	-5	down	ENSG00000249859.12
known_NIR_87	chr1	10434690	10451377	+	10434690;10440413	10440347;10451377	ES	ENST00000400900.6	known	0.02	2	90.5	2	179;2	y	0.02	2	118	2	233;3	y	0.02	1	65.5	1	131;0	n	0	0	102.5	0	205;0	n	0	0	87	0	174;0	n	0.01	1	114	1	228;0	n	0.0377496	-5	down	ENSG00000251503.8
known_NIR_563	chr1	1435821	1436807	+	1435821	1436927	A3SS	ENST00000476993.2	known	0	0	109	0	109	n	0	0	154	0	154	n	0	0	113	0	113	n	0.02	2	107	2	107	y	0.02	2	129	2	129	y	0.01	2	139	2	139	y	0.0377496	5	up	ENSG00000179403.12
known_NIR_1306	chr1	155717128	155725382	+	155717128;155721618	155721517;155725382	ES	ENST00000471214.5	known	0.06	34	520.5	34	430;611	y	0.06	37	573.5	37	472;675	y	0.06	31	447	31	388;506	y	0.07	46	599	46	490;708	y	0.08	47	544.5	47	455;634	y	0.08	52	583	52	505;661	y	0.0377496	5	up	ENSG00000132676.16
known_NIR_6451	chr10	97454799	97455639	+	97454799	97455660	A3SS	ENST00000370854.7	known	0.02	5	228	5	228	y	0.02	7	283	7	283	y	0.02	4	222	4	222	y	0	0	259	0	259	n	0.01	3	277	3	277	y	0	0	302	0	302	n	0.0377496	-5	down	ENSG00000171307.19
known_NIR_7033	chr11	126267712	126268688	-	126267712;126268086	126268003;126268688	ES	ENST00000332118.11	known	0.02	3	120	3	143;97	y	0.01	2	140	2	170;110	y	0.02	2	111	2	137;85	y	0	0	108.5	0	137;80	n	0	0	154	0	193;115	n	0	0	115.5	0	149;82	n	0.0377496	-5	down	ENSG00000182934.12
known_NIR_10896	chr12	121627174	121641041	+	121627050	121641041	A5SS	ENST00000617316.2	known	0	0	173	0	173	n	0	0	218	0	218	n	0.01	2	162	2	162	y	0.02	4	255	4	255	y	0.02	3	196	3	196	y	0.02	4	223	4	223	y	0.0377496	5	up	ENSG00000276045.3
known_NIR_11690	chr12	42355222	42387456	+	42355222	42374863	3pMXE	ENST00000551406.5	known	0.01	2	219	2	219	y	0.02	5	262	5	262	y	0.02	3	132	3	132	y	0	0	222	0	222	n	0	0	156	0	156	n	0	0	237	0	237	n	0.0377496	-5	down	ENSG00000134283.18
known_NIR_13466	chr12	7098388	7099686	-	7097163	7099686	A3SS	ENST00000266542.9	known	0.01	1	121	1	121	n	0.02	2	100	2	100	y	0.02	2	112	2	112	y	0	0	108	0	108	n	0	0	142	0	142	n	0	0	98	0	98	n	0.0377496	-5	down	ENSG00000139178.12
known_NIR_18354	chr16	1505601	1506225	+	1505601	1506238	A3SS	ENST00000262319.11	known	0.01	2	254	2	254	y	0	1	241	1	241	n	0	0	207	0	207	n	0.02	4	235	4	235	y	0.02	6	245	6	245	y	0.02	6	296	6	296	y	0.0377496	5	up	ENSG00000100726.15
known_NIR_20190	chr16	67828559	67828667	-	67828578	67828667	A3SS	ENST00000569862.5	known	0.02	3	158	3	158	y	0.02	4	185	4	185	y	0.02	2	126	2	126	y	0	0	183	0	183	n	0.01	2	163	2	163	y	0	0	169	0	169	n	0.0377496	-5	down	ENSG00000102901.13
known_NIR_21311	chr17	15239611	15262429	-	15239611;15259193	15259094;15262429	ES	ENST00000675854.1	known	0	0	120.5	0	238;3	n	0	0	102.5	0	202;3	n	0	0	71.5	0	139;4	n	0.02	2	116	2	228;4	y	0.02	2	115.5	2	231;0	n	0.01	2	135	2	270;0	n	0.0377496	5	up	ENSG00000109099.16
known_NIR_21743	chr17	28584480	28585102	-	28584480;28584745	28584652;28585102	ES	ENST00000321765.10	known	0	0	127	0	147;107	n	0	0	156.5	0	184;129	n	0	0	89	0	82;96	n	0.02	2	129	2	146;112	y	0.01	1	100	1	117;83	n	0.02	2	125	2	122;128	y	0.0377496	5	up	ENSG00000076382.17
known_NIR_23968	chr17	75521510	75522007	+	75521510	75521705	A3SS	ENST00000434205.8	known	0.02	6	243	6	243	y	0.01	2	340	2	340	y	0.02	5	257	5	257	y	0	0	257	0	257	n	0	1	311	1	311	n	0	0	311	0	311	n	0.0377496	-5	down	ENSG00000182173.14
known_NIR_32046	chr2	32290636	32298234	+	32290636;32292348	32292177;32298234	ES	ENST00000238831.9	known	0	0	116.5	0	115;118	n	0	0	116.5	0	100;133	n	0	0	79.5	0	79;80	n	0.01	2	132	2	111;153	y	0.02	2	119.5	2	145;94	y	0.02	2	103	2	91;115	y	0.0377496	5	up	ENSG00000119820.11
known_NIR_35147	chr22	17613320;17619127	17619034;17619461	-	17613320	17619461	cassetteExon	ENST00000253413.10	known	0	2	546	2;2	546	y	0	2.5	728	2;3	728	y	0	0	524	0;0	524	n	0.02	16.5	654	22;11	654	y	0.01	6	591	4;8	591	y	0.02	11.5	746	11;12	746	y	0.0377496	5	up	ENSG00000131100.13
known_NIR_41628	chr5	140551169	140557147	-	140551169;140552184	140551982;140557147	ES	ENST00000602775.5	known	0.05	34	716	34	648;784	y	0.05	44	822	44	698;946	y	0.05	35	701	35	543;859	y	0.03	26	799.5	26	752;847	y	0.04	41	913.5	41	790;1037	y	0.03	31	878.5	31	707;1050	y	0.0377496	-5	down	ENSG00000213523.12
known_NIR_42756	chr5	6633869;6652008	6651842;6656078	+	6633869	6656078	cassetteExon	ENST00000513117.1	known	1	50.5	0	35;66	0	n	1	76.5	0	81;72	0	n	1	49	0	30;68	0	n	0.94	83	5	61;105	5	y	0.94	67	4	63;71	4	y	0.97	61	2	60;62	2	y	0.0377496	-5	down	ENSG00000145545.12
known_NIR_47932	chr7	99617016;99618209	99618135;99618525	+	99617016	99618525	cassetteExon	ENST00000481424.5	known	0	0	11	0;0	11	n	0.25	4	12	3;5	12	y	0	0	5	0;0	5	n	-	-	-	-	-	-	0.5	3	3	3;3	3	n	0.5	4	4	4;4	4	y	0.0377496	5	up	ENSG00000197037.11
known_NIR_48461	chr8	127882185	127890589	+	127794734	127890589	A5SS	ENST00000667305.1	known	0	0	436	0	436	n	0	0	550	0	550	n	0	0	410	0	410	n	0.02	8	492	8	492	y	0.01	3	529	3	529	y	0.02	8	498	8	498	y	0.0377496	5	up	ENSG00000249859.12
known_NIR_49480	chr8	38144386	38145963	-	38144386;38145315	38145222;38145963	ES	ENST00000276449.9	known	0	0	34.5	0	38;31	n	0	0	42	0	45;39	n	0	0	16.5	0	17;16	n	0.1	2	18	2	22;14	y	0.1	2	18	2	24;12	y	0.05	2	34.5	2	33;36	y	0.0377496	5	up	ENSG00000147465.12
known_NIR_50760	chr9	133031164	133050783	+	133043926	133050783	A5SS&ES	ENST00000440319.5	known	0	1	218	1	218	n	0	0	242	0	242	n	0	0	265	0	265	n	0.02	4	242	4	242	y	0.02	6	325	6	325	y	0.01	3	325	3	325	y	0.0377496	5	up	ENSG00000148308.18
known_NIR_51563	chr9	96958897	97013259	-	96958897;96972948	96972853;97013259	ES	ENST00000647176.1	known	0	0	58	0	44;72	n	0	0	62.5	0	69;56	n	0	0	63	0	62;64	n	0.03	2	58.5	2	52;65	y	0.06	3	50	3	59;41	y	0.06	3	49.5	3	45;54	y	0.0377496	5	up	ENSG00000196312.15
known_NIR_51774	chrX	123619436	123620188	-	123619436	123620907	A5SS	ENST00000448128.5	known	0	0	63	0	63	n	0	0	59	0	59	n	0	0	33	0	33	n	0.04	2	50	2	50	y	0.04	2	53	2	53	y	0.02	2	95	2	95	y	0.0377496	5	up	ENSG00000125676.20
known_NIR_52363	chrX	2935190	2943065	-	2938257	2943065	A3SS&ES	ENST00000672097.1	known	0	0	92	0	92	n	0	0	132	0	132	n	0	0	121	0	121	n	0.02	2	122	2	122	y	0.02	2	129	2	129	y	0.01	1	82	1	82	n	0.0377496	5	up	ENSG00000157399.17
novel_NIR_17199	chr13	114282652	114282837	+	114281846	114282837	A5SS	ENST00000484246.5	novel	0	0	6	0	6	n	0.5	2	2	2	2	y	0	0	2	0	2	n	1	1	0	1	0	n	-	-	-	-	-	-	1	4	0	4	0	y	0.0377496	5	up	ENSG00000169062.15
novel_NIR_24412	chr16	57785666	57788575	-	57772288	57788575	A3SS	ENST00000465878.6	novel	0	0	4	0	4	n	0.5	4	4	4	4	y	0	0	1	0	1	n	1	2	0	2	0	y	1	9	0	9	0	y	1	19	0	19	0	y	0.0377496	5	up	ENSG00000140859.16
novel_NIR_33814	chr19	43595340	43595604	-	43595340	43595982	A5SS	ENST00000422989.6	novel	0.5	1	1	1	1	n	1	2	0	2	0	y	1	2	0	2	0	y	-	-	-	-	-	-	0	0	2	0	2	n	0	0	2	0	2	n	0.0377496	-5	down	ENSG00000167378.9
novel_NIR_57475	chr7	107613432	107621393	+	107613432	107615246	3pMXE	ENST00000436699.2	novel	-	-	-	-	-	-	1	2	0	2	0	y	1	1	0	1	0	n	0.5	1	1	1	1	n	0	0	3	0	3	n	0	0	2	0	2	n	0.0377496	-5	down	ENSG00000075790.12
novel_NIR_65643	chr9	134136590	134139820	+	134135842	134139820	A5SS	ENST00000608937.5	novel	1	4	0	4	0	y	0.5	2	2	2	2	y	1	1	0	1	0	n	0	0	4	0	4	n	-	-	-	-	-	-	0	0	3	0	3	n	0.0377496	-5	down	ENSG00000196363.10
known_NIR_7648	chr11	34947606	34957384	+	34947606	34984570	A3SS	ENST00000430469.6	known	0.98	50	1	50	1	n	1	52	0	52	0	n	1	26	0	26	0	n	0.96	51	2	51	2	y	0.96	54	2	54	2	y	0.96	53	2	53	2	y	0.0377496	-5	down	ENSG00000110435.13
known_NIR_33817	chr20	38421098	38422291	-	38421098	38422092	A5SS	ENST00000667188.1	known	0.06	11	187	11	187	y	0.06	13	211	13	211	y	0.06	10	146	10	146	y	0.04	7	171	7	171	y	0.02	4	216	4	216	y	0.02	6	245	6	245	y	0.0377496	-5	down	ENSG00000196756.13
known_NIR_52223	chrX	154508811	154511848	-	154508597	154511848	A3SS	ENST00000359889.9	known	0.02	11	440	11	440	y	0.01	6	456	6	456	y	0.01	4	376	4	376	y	0.03	13	473	13	473	y	0.03	12	431	12	431	y	0.03	14	475	14	475	y	0.0377496	5	up	ENSG00000071889.17
known_NIR_26571	chr19	1478905	1479114	-	1478905	1479163	A5SS	ENST00000588427.5	known	0.12	5	37	5	37	y	0.06	3	49	3	49	y	0.13	6	40	6	40	y	0	0	65	0	65	n	0.05	2	40	2	40	y	0	0	50	0	50	n	0.0377962	-3.15296	down	ENSG00000119559.17
known_NIR_49290	chr8	22066893;22067159	22067085;22067527	+	22066893	22067527	cassetteExon	ENST00000522148.5	known	0.63	23.5	14	23;24	14	y	0.81	25.5	6	19;32	6	y	0.76	12.5	4	10;15	4	y	1	20.5	0	18;23	0	n	0.91	29	3	24;34	3	y	0.94	29.5	2	30;29	2	y	0.0378582	3.62231	up	ENSG00000158856.18
known_NIR_7336	chr11	18412843	18434740	+	18412843;18429910	18429737;18434740	ES	ENST00000396215.7	known	0	0	20	0	6;34	n	0.06	1	17	1	5;29	n	0	0	13.5	0	6;21	n	0.14	4	24.5	4	16;33	y	0.2	5	20.5	5	4;37	y	0.3	8	18.5	8	4;33	y	0.0379454	3.80789	up	ENSG00000166796.12
novel_NIR_26076	chr16	89972765	89977715	+	89972765	89978810	A3SS	ENST00000429663.5	novel	0.5	4	4	4	4	y	0.21	4	15	4	15	y	0.25	1	3	1	3	n	0.75	3	1	3	1	y	1	4	0	4	0	y	0.6	3	2	3	2	y	0.0379618	3.1349	up	ENSG00000223959.8
novel_NIR_3385	chr1	221914531;221915935	221915789;221918592	-	221914531	221918592	cassetteExon	ENST00000433576.5	novel	0.29	5	12	10;0	12	n	0.29	5	12	2;8	12	y	0.2	2	8	2;2	8	y	0.15	2.5	14	5;0	14	n	0.15	2	11	4;0	11	n	0.11	1	8	0;2	8	n	0.0379944	-3.75678	down	ENSG00000238042.5
known_NIR_2678	chr1	228141829	228145511	+	228140159	228145511	A5SS	ENST00000366730.5	known	1	19	0	19	0	n	1	15	0	15	0	n	1	12	0	12	0	n	0.82	33	7	33	7	y	0.79	11	3	11	3	y	0.9	19	2	19	2	y	0.0381056	-4.9752	down	ENSG00000143774.17
novel_NIR_34243	chr19	47169923	47176215	+	47169923	47209159	A3SS	ENST00000413379.7	novel	0.82	14	3	14	3	y	0.79	11	3	11	3	y	0.9	19	2	19	2	y	1	20	0	20	0	y	1	13	0	13	0	y	1	15	0	15	0	y	0.0381056	4.9752	up	ENSG00000142230.13
novel_NIR_61078	chr7	87964684	87971294	+	87964684	87978336	A3SS	ENST00000412441.5	novel	0	0	6	0	6	n	-	-	-	-	-	-	0.25	1	3	1	3	n	0.67	4	2	4	2	y	0.88	7	1	7	1	y	1	2	0	2	0	y	0.0381613	4.5922	up	ENSG00000008277.15
known_NIR_5337	chr10	122332258	122332436	+	122331258	122332436	A5SS	ENST00000260723.6	known	0.71	30	12	30	12	y	0.92	22	2	22	2	y	0.84	16	3	16	3	y	0.6	12	8	12	8	y	0.5	9	9	9	9	y	0.65	13	7	13	7	y	0.0382661	-3.18198	down	ENSG00000138152.10
known_NIR_41054	chr5	103019843	103028182	+	103019843	103028185	A3SS	ENST00000510208.2	known	0.53	31	28	31	28	y	0.44	19	24	19	24	y	0.54	36	31	36	31	y	0.78	62	17	62	17	y	0.77	64	19	64	19	y	0.61	40	26	40	26	y	0.0382883	3.40693	up	ENSG00000145730.21
novel_NIR_165	chr1	1059846	1060277	+	1059846	1060280	A3SS	ENST00000427998.5	novel	0.67	2	1	2	1	y	0.33	2	4	2	4	y	0.43	3	4	3	4	y	0	0	4	0	4	n	0.09	2	20	2	20	n	0	0	22	0	22	n	0.0383195	-4.24382	down	ENSG00000217801.10
novel_NIR_14890	chr12	42161765	42235614	-	42161765	42210355	A5SS&ES	ENST00000548661.5	novel	0.2	1	4	1	4	n	0.11	1	8	1	8	n	0	0	7	0	7	n	0.56	5	4	5	4	y	1	5	0	5	0	y	0.57	4	3	4	3	y	0.038373	3.88556	up	ENSG00000015153.15
known_NIR_11759	chr12	47706163	47719147	+	47717636	47719147	5pMXE	ENST00000552502.1	known	0.59	10	7	10	7	y	0.78	7	2	7	2	n	0.75	6	2	6	2	n	1	6	0	6	0	n	0.93	13	1	13	1	n	0.89	16	2	16	2	y	0.0383742	3.47404	up	ENSG00000257433.6
known_NIR_50857	chr9	136674807;136676680	136676585;136676961	-	136674807	136676961	cassetteExon	ENST00000371694.7	known	0.77	281	83	327;235	83	y	0.74	329	118	400;258	118	y	0.77	218.5	65	268;169	65	y	0.81	248.5	59	300;197	59	y	0.8	326	84	401;251	84	y	0.8	296.5	73	340;253	73	y	0.0383797	4.11096	up	ENSG00000169692.13
known_NIR_7612	chr11	33698514	33709906	-	33698514	33710206	A5SS	ENST00000534312.5	known	0.63	12	7	12	7	y	0.88	14	2	14	2	y	0.69	11	5	11	5	y	0.33	4	8	4	8	y	0.33	4	8	4	8	y	0.56	10	8	10	8	y	0.0384605	-3.03885	down	ENSG00000284969.1
known_NIR_41264	chr5	132218644;132227221	132227086;132227790	-	132218644	132227790	cassetteExon	ENST00000360568.8	known	0.62	44	27	81;7	27	y	0.59	41.5	29	71;12	29	y	0.53	25.5	23	49;2	23	y	0.49	35	37	54;16	37	y	0.44	32	41	60;4	41	y	0.5	35.5	36	62;9	36	y	0.0385107	-3.19741	down	ENSG00000072682.20
known_NIR_6041	chr10	72133181	72161538	-	72133181;72152988	72152869;72161538	ES	ENST00000394919.5	known	0.14	16	99	16	118;80	y	0.12	17	124.5	17	140;109	y	0.12	8	60.5	8	67;54	y	0.06	5	73.5	5	84;63	y	0.06	5	72	5	74;70	y	0.1	10	94	10	109;79	y	0.038561	-3.57771	down	ENSG00000138303.18
known_NIR_20895	chr16	88714926	88715182	+	88714926	88715048	A3SS	ENST00000567316.1	known	0.03	20	558	20	558	y	0.05	27	567	27	567	y	0.05	29	530	29	530	y	0.02	14	620	14	620	y	0.01	8	588	8	588	y	0.02	13	562	13	562	y	0.038561	-3.57771	down	ENSG00000174177.13
known_NIR_33657	chr20	35713096;35713857	35713702;35714185	-	35713096	35714185	cassetteExon	ENST00000639702.1	known	0.04	14	337	0;28	337	n	0.02	8.5	424	0;17	424	n	0.02	4	177	0;8	177	n	0.05	15	305	0;30	305	n	0.05	13.5	246	2;25	246	y	0.06	19.5	304	0;39	304	n	0.038561	3.57771	up	ENSG00000131051.24
known_NIR_51593	chrX	100635746	100636191	-	100635746	100636608	A5SS	ENST00000373020.9	known	0.03	4	144	4	144	y	0.03	3	110	3	110	y	0.04	4	90	4	90	y	0.02	2	93	2	93	y	0	0	82	0	82	n	0	0	95	0	95	n	0.038561	-3.57771	down	ENSG00000000003.15
novel_NIR_33664	chr19	41861212;41864267	41864028;41869031	+	41861212;41861560	41861480;41869031	MXE	ENST00000601492.5	novel	0.12	17.5	123	0;35	42;204	n	0.08	11	118.5	0;22	17;220	n	0.08	9.5	106.5	1;18	16;197	n	0.16	22.5	118	2;43	19;217	y	0.14	20.5	130	0;41	31;229	n	0.14	20.5	128.5	0;41	20;237	n	0.038561	3.57771	up	ENSG00000105372.8
known_NIR_46309	chr7	151226500	151226738	-	151226500	151227163	A5SS	ENST00000222388.6	known	0.09	11	105	11	105	y	0.08	10	112	10	112	y	0.08	7	78	7	78	y	0.05	6	111	6	111	y	0.05	6	121	6	121	y	0.07	9	117	9	117	y	0.038561	-3.57771	down	ENSG00000285292.1
known_NIR_31636	chr2	240596942	240597888	+	240587052	240597888	A5SS	ENST00000352879.8	known	0.97	76	2	76	2	y	0.97	105	3	105	3	y	0.96	101	4	101	4	y	1	123	0	123	0	n	0.98	128	2	128	2	y	1	107	0	107	0	n	0.038561	3.57771	up	ENSG00000142330.20
novel_NIR_6246	chr1	90935530	90937485	-	90918154	90937485	A3SS	ENST00000370440.5	novel	0.12	1	7	1	7	n	0	0	15	0	15	n	0	0	4	0	4	n	0.3	3	7	3	7	y	0.21	4	15	4	15	y	0.15	2	11	2	11	y	0.0386744	3.04256	up	ENSG00000122482.21
known_NIR_36452	chr3	111987051;111990751	111990700;111991377	+	111987051	111991377	cassetteExon	ENST00000491580.1	known	0.13	12	78	16;8	78	y	0.08	6.5	76	4;9	76	y	0.12	6	43	6;6	43	y	0.05	5.5	98	6;5	98	y	0.03	1.5	56	3;0	56	n	0.07	5	70	4;6	70	y	0.0386919	-3.1334	down	ENSG00000144827.9
novel_NIR_5932	chr1	71065137;71065748	71065679;71066776	-	71065137	71066776	cassetteExon	ENST00000370920.8	novel	0.33	13.5	28	0;27	28	n	0.25	9	27	0;18	27	n	0.29	7.5	18	2;13	18	y	0.11	4.5	38	0;9	38	n	0.21	7	27	0;14	27	n	0.19	7.5	31	0;15	31	n	0.0386919	-3.1334	down	ENSG00000132485.14
novel_NIR_42962	chr22	18079256	18079874	+	18078606	18079874	A5SS	ENST00000329627.11	novel	0.07	3	38	3	38	n	0.15	4	23	4	23	n	0.2	2	8	2	8	n	0.27	3	8	3	8	n	0.29	7	17	7	17	y	0.42	5	7	5	7	y	0.0387475	3.09208	up	ENSG00000215193.14
novel_NIR_14145	chr12	131961954	131977329	+	131961954	131979697	A3SS	ENST00000332482.8	novel	0	0	3	0	3	n	0	0	4	0	4	n	0	0	1	0	1	n	0.67	2	1	2	1	y	0.5	3	3	3	3	y	1	2	0	2	0	y	0.0387968	4.928	up	ENSG00000183495.14
novel_NIR_2680	chr1	19778518	19780580	-	19771482	19780580	A3SS	ENST00000375127.5	novel	0.38	13	21	13	21	y	0.21	8	31	8	31	y	0.27	11	30	11	30	y	0.1	3	26	3	26	n	0.11	4	32	4	32	n	0.04	2	54	2	54	n	0.038797	-3.74015	down	ENSG00000162542.14
known_NIR_50619	chr9	129493595	129503323	+	129493595;129503139	129502397;129503323	ES	ENST00000662331.1	known	0.73	70	26.5	70	17;36	y	0.73	79	29	79	30;28	y	0.8	78	19.5	78	18;21	y	0.87	89	13.5	89	7;20	y	0.85	88	15.5	88	14;17	y	0.85	101	18	101	20;16	y	0.0388557	4.25818	up	ENSG00000204054.14
known_NIR_29418	chr19	56158602	56159627	+	56158602	56159624	A3SS	ENST00000337080.8	known	0.4	88	130	88	130	y	0.36	89	158	89	158	y	0.3	54	128	54	128	y	0.21	56	211	56	211	y	0.25	55	167	55	167	y	0.24	55	176	55	176	y	0.0388766	-3.81599	down	ENSG00000167685.15
known_NIR_52296	chrX	15688858	15691138	+	15688858	15692963	A3SS	ENST00000380336.5	known	0	0	37	0	37	n	0	0	58	0	58	n	0	0	50	0	50	n	0.03	2	57	2	57	y	0.06	5	79	5	79	y	0.04	3	66	3	66	y	0.0390123	4.91354	up	ENSG00000186312.10
novel_NIR_50970	chr5	1035473	1036254	+	1035473	1036110	3pMXE	ENST00000519933.5	novel	0.67	4	2	4	2	y	0.46	6	7	6	7	y	0.33	2	4	2	4	y	0	0	3	0	3	n	0	0	1	0	1	n	0	0	3	0	3	n	0.039016	-4.91329	down	ENSG00000145506.14
known_NIR_46376	chr7	155707068	155711173	+	155707068	155711203	A3SS	ENST00000401878.8	known	1	5	0	5	0	n	1	8	0	8	0	n	1	1	0	1	0	n	0.54	7	6	7	6	y	0.67	2	1	2	1	n	0.33	6	12	6	12	y	0.039016	-4.91329	down	ENSG00000184863.11
novel_NIR_54881	chr6	169602321	169624730	-	169602321	169632947	A5SS	ENST00000647790.1	novel	0.76	13	4	13	4	y	0.52	11	10	11	10	y	0.85	11	2	11	2	y	0.28	5	13	5	13	y	0	0	3	0	3	n	0.41	7	10	7	10	y	0.039076	-3.07709	down	ENSG00000184465.16
known_NIR_52365	chrX	2943199;2953265	2953143;2955416	-	2943199;2949727	2945998;2955416	MXE	ENST00000682184.1	known	0.61	111.5	70	4;219	133;7	y	0.62	94.5	58	0;189	116;0	n	0.58	77	56.5	0;154	111;2	n	0.66	101	52.5	9;193	105;0	n	0.66	117	60.5	2;232	121;0	n	0.65	111	60	0;222	120;0	n	0.0390855	4.27618	up	ENSG00000157399.17
known_NIR_38644	chr3	48970841	48973699	+	48970704	48973699	A5SS	ENST00000490095.5	known	0.04	8	171	8	171	y	0.08	14	169	14	169	y	0.05	4	71	4	71	y	0	0	154	0	154	n	0.01	2	137	2	137	y	0	0	154	0	154	n	0.0390855	-4.27618	down	ENSG00000177479.20
known_NIR_51530	chr9	93450599	93452740	-	93450599	93450945	5pMXE	ENST00000650398.1	known	0.2	6	24	6	24	y	0.36	4	7	4	7	y	0.2	2	8	2	8	y	0.04	1	24	1	24	n	0	0	6	0	6	n	0	0	17	0	17	n	0.0392201	-4.36564	down	ENSG00000188938.17
known_NIR_48784	chr8	142274863	142284413	-	142274863	142279860	5pMXE	ENST00000521825.1	known	0.61	14	9	14	9	y	0.43	12	16	12	16	y	0.5	4	4	4	4	n	0.27	4	11	4	11	y	0.27	4	11	4	11	y	0.25	2	6	2	6	n	0.0393179	-4.73396	down	ENSG00000171045.16
known_NIR_23938	chr17	75286802;75288591	75288502;75289089	-	75286802;75288461	75288388;75289089	MXE	ENST00000579207.5	known	0.21	17	63	30;4	120;6	y	0.2	16.5	65.5	31;2	121;10	y	0.23	18	59.5	35;1	115;4	n	0.29	21.5	52.5	36;7	101;4	y	0.25	23.5	69	43;4	133;5	y	0.31	27	60	52;2	114;6	y	0.039326	3.54965	up	ENSG00000125454.12
known_NIR_3254	chr1	28560732	28560868	+	28560732	28561113	A3SS	ENST00000495995.5	known	0.82	9	2	9	2	y	0.64	7	4	7	4	y	0.67	8	4	8	4	y	0.19	4	17	4	17	y	0	0	6	0	6	n	0.43	10	13	10	13	y	0.0393572	-3.69283	down	ENSG00000180098.9
known_NIR_15586	chr14	54530226	54530903	+	54530763	54530903	A5SS	ENST00000556216.5	known	0.71	24	10	24	10	y	0.74	37	13	37	13	y	0.77	17	5	17	5	y	0.64	16	9	16	9	y	0.7	26	11	26	11	y	0.65	37	20	37	20	y	0.039402	-3.02005	down	ENSG00000100532.13
known_NIR_4421	chr1	54047372	54053356	-	54047372	54048650	A5SS&ES	ENST00000452421.5	known	1	24	0	24	0	n	1	32	0	32	0	n	1	18	0	18	0	n	0.92	24	2	24	2	y	0.83	20	4	20	4	y	0.85	33	6	33	6	y	0.0394158	-4.88678	down	ENSG00000116209.12
novel_NIR_54505	chr6	144150703	144151096	+	144150703	144186623	A3SS	ENST00000367568.5	novel	0	0	3	0	3	n	0.17	2	10	2	10	y	0	0	2	0	2	n	0.67	4	2	4	2	y	-	-	-	-	-	-	0.5	2	2	2	2	y	0.0394304	5.17176	up	ENSG00000135604.10
novel_NIR_15374	chr12	51056502	51058024	+	51056502	51059361	A3SS	ENST00000547256.1	novel	0.25	3	9	3	9	y	0.12	2	15	2	15	n	0.18	2	9	2	9	y	0	0	12	0	12	n	0	0	10	0	10	n	0	0	20	0	20	n	0.0395119	-4.88046	down	ENSG00000050426.16
novel_NIR_6257	chr1	92298029	92298486	-	92298029	92298925	A5SS	ENST00000370360.8	novel	0	0	5	0	5	n	0	0	6	0	6	n	0	0	2	0	2	n	0.29	4	10	4	10	y	0.22	2	7	2	7	y	0.44	4	5	4	5	y	0.0395217	4.87982	up	ENSG00000174842.17
known_NIR_43084	chr5	889647	891155	-	889766	891155	A3SS	ENST00000490814.6	known	0.89	93	11	93	11	y	0.85	88	16	88	16	y	0.9	82	9	82	9	y	0.98	129	2	129	2	y	0.92	105	9	105	9	y	0.95	98	5	98	5	y	0.039527	3.03109	up	ENSG00000028310.18
known_NIR_19169	chr16	3065687	3065781	+	3065687	3065784	A3SS	ENST00000529550.5	known	0.01	3	259	3	259	y	0.03	9	297	9	297	y	0.04	8	218	8	218	y	0.09	26	278	26	278	y	0.05	14	280	14	280	y	0.08	23	249	23	249	y	0.0395679	3.1305	up	ENSG00000008517.19
known_NIR_35285	chr22	20052584;20053551	20053437;20063338	+	20052584;20061683	20061530;20063338	MXE	ENST00000401886.5	known	0.3	16	37.5	32;0	6;69	n	0.38	21	34	42;0	4;64	n	0.35	15	28	30;0	5;51	n	0.23	11	36.5	22;0	2;71	n	0.23	10	34	18;2	4;64	y	0.29	10	24	20;0	2;46	n	0.0396921	-3.03703	down	ENSG00000183597.16
known_NIR_40160	chr4	184682336	184685412	+	184682336	184685409	A3SS	ENST00000515774.5	known	0.16	5	26	5	26	y	0.23	5	17	5	17	y	0.12	2	15	2	15	y	0.04	1	24	1	24	n	0	0	16	0	16	n	0.09	2	21	2	21	y	0.0397378	-3.06213	down	ENSG00000164306.11
known_NIR_2131	chr1	201222827	201225824	+	201222827;201224874	201224679;201225824	ES	ENST00000335211.9	known	0.63	11	6.5	11	7;6	y	0.67	15	7.5	15	7;8	y	0.63	12	7	12	9;5	y	0.11	1	8	1	5;11	n	0	0	10.5	0	15;6	n	0.35	6	11	6	13;9	y	0.0397519	-4.70295	down	ENSG00000163395.17
known_NIR_28768	chr19	48838129	48841149	-	48838129;48839263	48839205;48841149	ES	ENST00000263265.11	known	0.43	112	145.5	112	153;138	y	0.49	130	136.5	130	141;132	y	0.43	79	106	79	94;118	y	0.54	130	112	130	118;106	y	0.54	157	136	157	132;140	y	0.55	130	106	130	107;105	y	0.0397697	4.60317	up	ENSG00000105559.12
novel_NIR_50486	chr4	74552832	74584015	-	74552832;74556100	74555991;74584015	ES	ENST00000510419.1	novel	0.71	37	15	37	13;17	y	0.71	41	16.5	41	20;13	y	0.7	24	10.5	24	15;6	y	0.62	33	20.5	33	24;17	y	0.55	23	18.5	23	21;16	y	0.62	36	22.5	36	30;15	y	0.0397833	-4.6669	down	ENSG00000249942.1
novel_NIR_65843	chr9	137574846	137576080	-	137574843	137576080	A3SS	ENST00000277540.7	novel	0.3	18	42	18	42	y	0.2	17	69	17	69	y	0.25	21	62	21	62	y	0.1	8	73	8	73	n	0.02	1	63	1	63	n	0.16	14	72	14	72	y	0.0398174	-3.14735	down	ENSG00000148399.13
known_NIR_9483	chr11	73264649;73272466	73272307;73296485	+	73264649;73295815	73295730;73296485	MXE	ENST00000393592.7	known	0.09	1.5	14.5	3;0	6;23	n	0.08	1.5	18	1;2	4;32	n	0.12	1.5	10.5	0;3	2;19	n	0.28	2.5	6.5	5;0	2;11	n	0.47	9	10	18;0	0;20	n	0.5	5	5	8;2	2;8	y	0.0398371	4.57662	up	ENSG00000171631.16
known_NIR_13237	chr12	6670838	6673216	-	6670838;6672532	6672350;6673216	ES	ENST00000683879.1	known	0.83	167	34.5	167	40;29	y	0.8	192	47	192	58;36	y	0.82	130	28.5	130	40;17	y	0.85	234	41	234	47;35	y	0.85	212	36	212	44;28	y	0.86	213	35	213	37;33	y	0.0398716	3.88909	up	ENSG00000126746.18
known_NIR_32432	chr2	63841232;63842599	63842539;63856306	+	63841232	63856306	cassetteExon	ENST00000466642.5	known	0.04	2.5	60	3;2	60	y	0.03	3.5	106	5;2	106	y	0.06	4	61	6;2	61	y	0.01	1	97	2;0	97	n	0.01	1	71	1;1	71	n	0	0	77	0;0	77	n	0.0398716	-3.88909	down	ENSG00000169764.16
known_NIR_11360	chr12	15957033;15958335	15958188;15959829	+	15957033	15959829	cassetteExon	ENST00000526521.5	known	0.99	173	2	138;208	2	y	0.99	183.5	2	162;205	2	y	1	163.5	0	140;187	0	n	0.96	202.5	9	164;241	9	y	0.94	199	13	167;231	13	y	0.97	206.5	6	173;240	6	y	0.0398716	-3.88909	down	ENSG00000023697.13
known_NIR_19364	chr16	397313	398990	+	398179	398990	5pMXE	ENST00000450036.1	known	0.94	239	16	239	16	y	0.97	211	6	211	6	y	0.95	184	10	184	10	y	0.92	237	21	237	21	y	0.91	231	24	231	24	y	0.92	247	21	247	21	y	0.0398716	-3.88909	down	ENSG00000103202.13
known_NIR_2288	chr1	20779911	20787195	-	20779911;20780540	20780345;20787195	ES	ENST00000438032.6	known	0.34	14	27	14	29;25	y	0.23	4	13.5	4	22;5	y	0.26	7	19.5	7	30;9	y	0.05	1	21	1	32;10	n	0.14	3	18.5	3	23;14	y	0.18	6	26.5	6	32;21	y	0.0398969	-3.03315	down	ENSG00000127483.19
known_NIR_35634	chr22	29832342	29838178	-	29832342	29834489	5pMXE	ENST00000458594.5	known	0.6	32	21	32	21	y	0.52	30	28	30	28	y	0.6	25	17	25	17	y	0.3	18	42	18	42	y	0.44	32	40	32	40	y	0.23	12	41	12	41	y	0.0399013	-3.71761	down	ENSG00000100325.15
known_NIR_1080	chr1	155060832	155061904	+	155060832	155061415	3pMXE	ENST00000461564.6	known	0.54	74	63	74	63	y	0.52	95	89	95	89	y	0.49	63	65	63	65	y	0.55	62	50	62	50	y	0.6	64	42	64	42	y	0.59	83	57	83	57	y	0.0399056	3.00416	up	ENSG00000143537.14
known_NIR_24134	chr17	7586078;7586838	7586656;7587161	+	7586078	7587161	cassetteExon	ENST00000584378.5	known	0.87	33	5	14;52	5	y	0.9	28	3	19;37	3	y	0.94	16.5	1	7;26	1	n	0.95	40	2	15;65	2	y	1	32	0	19;45	0	n	1	28	0	20;36	0	n	0.0399841	3.048	up	ENSG00000129255.16
known_NIR_20668	chr16	81905507	81906217	+	81905507	81907685	A3SS	ENST00000564138.6	known	0	0	55	0	55	n	0	0	19	0	19	n	0.05	1	18	1	18	n	0.07	4	57	4	57	y	0.1	4	37	4	37	y	0.15	9	50	9	50	y	0.0400285	3.13869	up	ENSG00000197943.10
known_NIR_27458	chr19	35744421	35745125	-	35744981	35745125	A3SS	ENST00000585554.5	known	0.83	48	10	48	10	y	0.83	35	7	35	7	y	0.77	37	11	37	11	y	0.96	48	2	48	2	y	0.88	42	6	42	6	y	1	39	0	39	0	n	0.0400479	3.37018	up	ENSG00000161265.15
known_NIR_28216	chr19	42302325	42302699	-	42302325	42302437	A5SS	ENST00000538771.5	known	0.01	4	358	4	358	y	0.03	10	328	10	328	y	0.03	8	251	8	251	y	0.04	12	300	12	300	y	0.06	20	314	20	314	y	0.05	16	332	16	332	y	0.0400537	3.02372	up	ENSG00000079462.8
known_NIR_34205	chr20	46357702	46358387	-	46357773	46358387	A3SS	ENST00000543605.5	known	0.07	18	252	18	252	y	0.08	21	240	21	240	y	0.09	16	167	16	167	y	0.06	17	251	17	251	y	0.04	13	278	13	278	y	0.06	13	204	13	204	y	0.0400537	-3.02372	down	ENSG00000080189.15
known_NIR_42071	chr5	176384283	176385221	-	176384374	176385221	A3SS	ENST00000614830.5	known	0.28	703	1821	703	1821	y	0.26	842	2439	842	2439	y	0.27	646	1790	646	1790	y	0.25	713	2118	713	2118	y	0.23	730	2479	730	2479	y	0.25	800	2409	800	2409	y	0.0400537	-3.02372	down	ENSG00000048162.21
known_NIR_49975	chr8	81718224	81732753	-	81718224	81732199	5pMXE	ENST00000520635.5	known	0.03	2	56	2	56	y	0.01	1	76	1	76	n	0.03	1	30	1	30	n	0.05	4	70	4	70	y	0.06	4	62	4	62	y	0.04	4	85	4	85	y	0.0400537	3.02372	up	ENSG00000104231.11
known_NIR_20796	chr16	87726924	87748673	-	87726924	87730552	5pMXE	ENST00000562872.1	known	0	0	163	0	163	n	0.02	5	211	5	211	y	0.02	4	182	4	182	y	0.04	7	174	7	174	y	0.05	14	252	14	252	y	0.03	7	212	7	212	y	0.0400537	3.02372	up	ENSG00000104731.14
known_NIR_23012	chr17	50140359	50141269	-	50140228	50141269	A3SS	ENST00000612501.2	known	0.03	4	138	4	138	y	0.05	8	159	8	159	y	0.03	3	97	3	97	y	0.01	2	166	2	166	y	0.02	3	195	3	195	y	0	0	168	0	168	n	0.0400537	-3.02372	down	ENSG00000108819.11
known_NIR_27508	chr19	36010683;36011464	36011404;36013344	-	36010683;36013089	36010894;36013344	MXE	ENST00000497999.1	known	0.01	5	369.5	9;1	308;431	n	0.03	13	367	23;3	219;515	y	0.02	6	307	9;3	279;335	y	0.04	11.5	309.5	23;0	283;336	n	0.06	25	397.5	41;9	318;477	y	0.04	12.5	317.5	24;1	233;402	n	0.0400537	3.02372	up	ENSG00000239382.10
known_NIR_45425	chr7	103083830;103084062	103084030;103086630	+	103083830	103086630	cassetteExon	ENST00000541300.5	known	0.08	40	447	34;46	447	y	0.07	35.5	463	29;42	463	y	0.06	19	320	15;23	320	y	0.09	43	418	41;45	418	y	0.11	47	398	39;55	398	y	0.09	43.5	450	50;37	450	y	0.0400537	3.02372	up	ENSG00000170632.14
known_NIR_5848	chr10	49987234;49988215	49988121;49988751	+	49987234	49988751	cassetteExon	ENST00000651763.1	known	1	3	0	1;5	0	n	0.67	4	2	5;3	2	y	0.71	2.5	1	2;3	1	n	0.2	2	8	2;2	8	y	0	0	6	0;0	6	n	0.5	2	2	4;0	2	n	0.0401322	-3.13431	down	ENSG00000178440.8
known_NIR_52950	chrX	73947374;73994961	73994840;74004270	+	73947374;74000496	73962735;74004270	MXE	ENST00000654005.1	known	0.29	5.5	13.5	0;11	0;27	n	0.24	5.5	17	2;9	2;32	y	0.33	6	12	3;9	0;24	n	0.1	3	27.5	2;4	0;55	n	0.05	1	18.5	0;2	4;33	n	0.2	4.5	17.5	1;8	2;33	n	0.0401746	-3.31982	down	ENSG00000225470.8
novel_NIR_4261	chr1	26256876	26257597	+	26255865	26257597	A5SS	ENST00000640292.2	novel	0	0	20	0	20	n	0.24	9	28	9	28	y	0	0	17	0	17	n	0.45	5	6	5	6	n	0.42	5	7	5	7	y	0.33	3	6	3	6	y	0.0403184	3.64674	up	ENSG00000130695.16
known_NIR_20755	chr16	8621775	8625496	+	8624118	8625496	5pMXE	ENST00000563037.1	known	0.79	22	6	22	6	y	0.82	18	4	18	4	y	0.64	21	12	21	12	y	0.89	25	3	25	3	y	1	33	0	33	0	n	1	24	0	24	0	n	0.0403872	3.2	up	ENSG00000067365.15
novel_NIR_17866	chr13	64003468	64075242	-	64034537	64075242	A3SS&ES	ENST00000650541.1	novel	0.67	4	2	4	2	y	0.56	5	4	5	4	y	0.38	5	8	5	8	y	0.33	1	2	1	2	n	0	0	6	0	6	n	0	0	5	0	5	n	0.0403946	-3.07564	down	ENSG00000227674.3
novel_NIR_62382	chr8	127995228	127996561	+	127995093	127996561	A5SS	ENST00000667539.1	novel	0.23	3	10	3	10	y	0	0	5	0	5	n	-	-	-	-	-	-	1	2	0	2	0	y	0.81	13	3	13	3	y	0.77	10	3	10	3	y	0.0404127	5.51348	up	ENSG00000249859.12
novel_NIR_9472	chr11	118908655	118918826	-	118908655;118910015	118909914;118918826	ES	ENST00000683865.1	novel	0.44	4	5	4	10;0	y	0.2	3	12	3	18;6	y	0.29	1	2.5	1	5;0	n	0	0	6	0	11;1	n	0.12	1	7.5	1	7;8	n	0	0	4	0	5;3	n	0.0404257	-3.34894	down	ENSG00000186174.13
known_NIR_19009	chr16	29818544	29819540	-	29810173	29819540	A3SS	ENST00000569039.5	known	0	0	4	0	4	n	0.38	8	13	8	13	y	0.1	2	18	2	18	y	0.71	5	2	5	2	n	0.44	4	5	4	5	n	0.64	9	5	9	5	y	0.0405038	3.12882	up	ENSG00000238045.9
novel_NIR_52358	chr5	178224729	178229940	-	178226698	178229940	3pMXE	ENST00000511716.1	novel	0.56	5	4	5	4	y	0.88	7	1	7	1	y	0.75	3	1	3	1	y	0.33	1	2	1	2	n	0.29	4	10	4	10	y	0.4	2	3	2	3	y	0.0405416	-3.96667	down	ENSG00000175309.15
known_NIR_23498	chr17	64822393	64829161	-	64822393;64824872	64824625;64829161	ES	ENST00000578036.5	known	0.31	8	17.5	8	24;11	y	0.15	6	33	6	28;38	y	0.2	2	8	2	10;6	y	0.11	2	16.5	2	19;14	y	0	0	19.5	0	16;23	n	0	0	28	0	31;25	n	0.0405636	-3.06503	down	ENSG00000214176.9
novel_NIR_68791	chrX	71108346;71108723	71108621;71109228	-	71108346	71109228	cassetteExon	ENST00000644708.1	novel	0.45	7.5	9	15;0	9	n	0.42	9.5	13	19;0	13	n	0.27	5.5	15	11;0	15	n	0.17	5	25	10;0	25	n	0.2	4.5	18	7;2	18	y	0.11	2	16	4;0	16	n	0.0405941	-3.56887	down	ENSG00000285171.1
novel_NIR_28745	chr17	64500882	64501057	-	64500773	64501057	A3SS	ENST00000678814.1	novel	0	0	10	0	10	n	0.1	1	9	1	9	n	0	0	9	0	9	n	0.5	1	1	1	1	n	0.46	6	7	6	7	y	0.22	2	7	2	7	y	0.040604	3.84734	up	ENSG00000108654.16
known_NIR_20944	chr16	89221152	89223157	+	89221152;89222183	89222092;89223157	ES	ENST00000433976.7	known	0.6	3	2	3	0;4	n	0.57	6	4.5	6	5;4	y	-	-	-	-	-	-	0	0	3.5	0	6;1	n	0	0	2	0	4;0	n	0.31	2	4.5	2	4;5	y	0.0406272	-4.61294	down	ENSG00000170100.14
novel_NIR_26140	chr17	10320512	10341064	+	10320512;10324967	10324843;10341064	ES	ENST00000577743.1	novel	0.4	78	118	78	131;105	y	0.39	97	151	97	173;129	y	0.38	60	99.5	60	130;69	y	0.24	43	138	43	175;101	y	0.31	71	157.5	71	206;109	y	0.31	75	163.5	75	199;128	y	0.0406548	-4.29893	down	ENSG00000264067.1
novel_NIR_61720	chr8	105927717	106059081	-	105927717	106060381	A5SS	ENST00000520433.5	novel	0.14	8	51	8	51	n	0.09	5	52	5	52	n	0.16	6	32	6	32	y	0.08	5	58	5	58	n	0.04	2	55	2	55	n	0.03	2	67	2	67	n	0.0407384	-3.09839	down	ENSG00000251003.9
novel_NIR_2819	chr1	202333555	202335646	-	202333555	202335642	A5SS	ENST00000460852.2	novel	0.86	31	5	31	5	y	0.78	31	9	31	9	y	0.83	24	5	24	5	y	0.74	29	10	29	10	y	0.7	14	6	14	6	y	0.76	41	13	41	13	y	0.0407531	-3.07694	down	ENSG00000077152.11
known_NIR_41733	chr5	141969167;141970877	141970704;141973583	+	141969167	141973583	cassetteExon	ENST00000347642.7	known	0.98	47	1	25;69	1	n	0.94	48.5	3	17;80	3	y	1	24.5	0	9;40	0	n	0.86	50.5	8	33;68	8	y	0.93	51.5	4	28;75	4	y	0.86	43	7	20;66	7	y	0.0407531	-3.07694	down	ENSG00000013561.18
known_NIR_33712	chr20	36236782;36236966	36236882;36239821	+	36236782	36239821	cassetteExon	ENST00000373932.3	known	0.93	13	1	13;13	1	n	1	4.5	0	1;8	0	n	1	6	0	5;7	0	n	0.72	15.5	6	5;26	6	y	0.82	9	2	14;4	2	y	0.6	12	8	4;20	8	y	0.0407637	-3.88734	down	ENSG00000131043.13
novel_NIR_1235	chr1	153609076	153630509	+	153628496	153630509	5pMXE	ENST00000368696.3	novel	0.36	4	7	4	7	y	0.17	2	10	2	10	y	0.26	5	14	5	14	y	0	0	14	0	14	n	0	0	19	0	19	n	0	0	15	0	15	n	0.0407845	-4.79891	down	ENSG00000160678.12
known_NIR_37254	chr3	155802591	155806139	-	155802591;155805723	155805597;155806139	ES	ENST00000482061.6	known	0.89	8	1	8	2;0	n	0.96	13	0.5	13	1;0	n	0.94	8	0.5	8	1;0	n	0.8	6	1.5	6	0;3	n	0.88	7	1	7	1;1	n	0.8	8	2	8	2;2	y	0.0408212	-3.05452	down	ENSG00000174928.16
known_NIR_21710	chr17	27642348	27645861	+	27642348	27643525	3pMXE	ENST00000583671.1	known	0.22	8	28	8	28	y	0.3	9	21	9	21	y	0.3	7	16	7	16	y	0.5	19	19	19	19	y	0.4	25	37	25	37	y	0.37	20	34	20	34	y	0.0408815	3.15838	up	ENSG00000168961.17
novel_NIR_64514	chr8	79940504	80002999	-	79958435	80002999	3pMXE	ENST00000518371.2	novel	0.33	13	26	13	26	y	0.19	6	25	6	25	y	0.19	6	25	6	25	y	0.46	25	29	25	29	y	0.53	19	17	19	17	y	0.35	9	17	9	17	y	0.0408892	2.99322	up	ENSG00000147586.10
known_NIR_34616	chr20	63706738	63707867	-	63706738;63707097	63706999;63707867	ES	ENST00000622789.5	known	0.1	10	93.5	10	171;16	y	0.03	4	116	4	206;26	y	0.06	6	97.5	6	177;18	y	0.16	17	88	17	156;20	y	0.15	22	129	22	244;14	y	0.16	21	112	21	209;15	y	0.0409354	4.5422	up	ENSG00000101246.20
novel_NIR_10494	chr11	35619915	35620376	+	35620061	35620376	A5SS	ENST00000532914.1	novel	1	11	0	11	0	y	0.94	33	2	33	2	y	1	16	0	16	0	y	0.79	22	6	22	6	y	0.86	32	5	32	5	y	0.69	22	10	22	10	y	0.0409366	-3.75735	down	ENSG00000179431.7
known_NIR_2190	chr1	202858164	202858882	-	202853280	202858882	A3SS	ENST00000443294.5	known	1	3	0	3	0	n	1	1	0	1	0	n	1	7	0	7	0	n	-	-	-	-	-	-	0.71	5	2	5	2	n	0.67	8	4	8	4	y	0.0410154	-15.5	down	ENSG00000214796.8
novel_NIR_24468	chr16	58709567	58718196	-	58716179	58718196	3pMXE	ENST00000564400.5	novel	-	-	-	-	-	-	0.33	2	4	2	4	y	0.29	2	5	2	5	y	0	0	2	0	2	n	0	0	1	0	1	n	0	0	2	0	2	n	0.0410154	-15.5	down	ENSG00000125166.13
novel_NIR_35206	chr19	55644316	55644553	+	55641183	55644553	A5SS	ENST00000585995.1	novel	0	0	1	0	1	n	0	0	5	0	5	n	0	0	7	0	7	n	-	-	-	-	-	-	0.29	2	5	2	5	y	0.33	3	6	3	6	y	0.0410154	15.5	up	ENSG00000171425.10
known_NIR_14519	chr14	103334260	103335653	+	103334260;103334597	103334389;103335653	ES	ENST00000559249.5	known	0.02	1	46	1	41;51	n	0	0	38	0	26;50	n	0.04	1	22	1	13;31	n	0.07	2	25	2	23;27	y	0.09	4	42	4	25;59	y	0.14	6	37	6	34;40	y	0.0411391	3.36067	up	ENSG00000100664.11
known_NIR_37213	chr3	150603686	150622385	+	150618928	150622385	A5SS&ES	ENST00000477889.5	known	1	4	0	4	0	n	0.67	16	8	16	8	y	1	12	0	12	0	n	0.35	6	11	6	11	y	0.63	24	14	24	14	y	0.42	10	14	10	14	y	0.0412203	-3.05691	down	ENSG00000198843.13
novel_NIR_58603	chr7	149267222	149276352	+	149267222	149278399	A3SS	ENST00000378052.5	novel	0	0	12	0	12	n	0	0	13	0	13	n	0	0	22	0	22	n	0.2	4	16	4	16	y	0.11	1	8	1	8	n	0.24	4	13	4	13	y	0.0412646	4.7691	up	ENSG00000204946.10
novel_NIR_17092	chr13	110698839	110701438	-	110697967	110701438	A3SS	ENST00000465145.5	novel	0.6	3	2	3	2	y	0.8	4	1	4	1	y	0.62	5	3	5	3	y	0.38	5	8	5	8	y	0.5	3	3	3	3	y	0.41	7	10	7	10	y	0.0413623	-3.32851	down	ENSG00000134905.17
known_NIR_5019	chr10	100999952	101002497	+	100998981	101002497	A5SS	ENST00000481129.1	known	1	8	0	8	0	n	0.66	21	11	21	11	y	1	3	0	3	0	n	0.38	3	5	3	5	n	0.62	13	8	13	8	y	0.36	4	7	4	7	y	0.0413873	-3.07784	down	ENSG00000107816.17
known_NIR_12037	chr12	50144057;50144969	50144769;50167101	-	50144057	50167101	cassetteExon	ENST00000317551.12	known	0.1	8	73	14;2	73	y	0.12	10.5	78	13;8	78	y	0.08	4.5	49	2;7	49	y	0.18	13	59	10;16	59	y	0.13	8.5	58	8;9	58	y	0.18	15	70	13;17	70	y	0.0414893	3.12358	up	ENSG00000139624.14
known_NIR_26321	chr19	1269410	1270928	+	1267292	1270928	A5SS	ENST00000588090.5	known	1	21	0	21	0	n	0.95	40	2	40	2	y	1	21	0	21	0	n	0.9	19	2	19	2	y	0.94	17	1	17	1	n	0.92	24	2	24	2	y	0.0414893	-3.12358	down	ENSG00000099622.14
novel_NIR_46321	chr3	184315856	184317321	+	184314674	184317321	A5SS	ENST00000392537.6	novel	0	0	18	0	18	n	0.25	4	12	4	12	y	0.25	2	6	2	6	y	0.44	4	5	4	5	y	0.47	8	9	8	9	y	0.57	8	6	8	6	y	0.0415182	3.54552	up	ENSG00000114867.22
known_NIR_23869	chr17	75218306	75225342	+	75225237	75225342	5pMXE	ENST00000579557.5	known	0.05	13	228	13	228	y	0.02	6	306	6	306	y	0.01	3	213	3	213	y	0.06	13	220	13	220	y	0.11	31	254	31	254	y	0.08	23	256	23	256	y	0.0415357	3.0052	up	ENSG00000125450.11
novel_NIR_20367	chr15	22812253	22814387	+	22812253	22814083	A3SS&ES	ENST00000557930.1	novel	0.2	1	4	1	4	n	0.36	4	7	4	7	y	0.2	1	4	1	4	n	0	0	1	0	1	n	0	0	3	0	3	n	0	0	1	0	1	n	0.0415768	-4.75	down	ENSG00000170113.16
known_NIR_38796	chr3	49910884	49913220	-	49910884;49912011	49911526;49913220	ES	ENST00000642691.1	known	0.24	38	121.5	38	111;132	y	0.28	46	120	46	103;137	y	0.28	37	96.5	37	89;104	y	0.22	35	123	35	108;138	y	0.19	33	144	33	123;165	y	0.23	41	140	41	130;150	y	0.0416519	-2.97113	down	ENSG00000164077.14
novel_NIR_13330	chr12	112907219	112908604	+	112907219	112916509	A3SS	ENST00000679971.1	novel	0	0	7	0	7	n	0	0	11	0	11	n	0	0	6	0	6	n	0.67	10	5	10	5	y	0.31	4	9	4	9	y	0.5	4	4	4	4	y	0.0416646	4.74466	up	ENSG00000089127.15
known_NIR_33667	chr20	35739017	35740525	-	35739547	35740525	3pMXE	ENST00000463098.5	known	0.71	46	19	46	19	y	0.74	61	21	61	21	y	0.7	52	22	52	22	y	0.67	50	25	50	25	y	0.62	50	30	50	30	y	0.59	50	35	50	35	y	0.0417505	-3.429	down	ENSG00000131051.24
known_NIR_33805	chr20	3822293	3823875	+	3822293	3823871	A3SS	ENST00000620777.1	known	0.11	4	32	4	32	y	0.09	7	69	7	69	y	0.15	10	57	10	57	y	0.04	2	52	2	52	y	0	0	48	0	48	n	0.07	6	82	6	82	y	0.041857	-2.97683	down	ENSG00000274949.1
novel_NIR_27435	chr17	41689069	41689749	+	41689069	41690088	A3SS	ENST00000310837.8	novel	0.14	12	72	12	72	n	0.18	14	64	14	64	y	0.11	8	67	8	67	n	0.03	3	87	3	87	n	0.09	8	78	8	78	n	0.07	6	79	6	79	n	0.041857	-2.97683	down	ENSG00000173812.11
known_NIR_7088	chr11	12980999	12986040	-	12980999	12984226	5pMXE	ENST00000529328.1	known	0.43	6	8	6	8	y	0.14	1	6	1	6	n	0.3	3	7	3	7	y	0.6	3	2	3	2	n	1	4	0	4	0	n	0.67	10	5	10	5	y	0.0418813	3.12893	up	ENSG00000251381.8
known_NIR_10195	chr12	104287346	104288931	+	104287109	104288931	A5SS	ENST00000526266.5	known	0.37	42	71	42	71	y	0.4	39	58	39	58	y	0.36	26	46	26	46	y	0.54	67	56	67	56	y	0.44	47	59	47	59	y	0.52	60	56	60	56	y	0.0418924	3.75678	up	ENSG00000198431.16
known_NIR_2747	chr1	231522637;231524547	231524426;231527338	-	231522637	231527338	cassetteExon	ENST00000654602.1	known	0.01	3	208	6;0	208	n	0.03	7.5	255	8;7	255	y	0.04	9	193	11;7	193	y	0.07	17.5	251	22;13	251	y	0.05	12	237	21;3	237	y	0.06	16.5	260	21;12	260	y	0.0419145	3.16228	up	ENSG00000233461.6
known_NIR_49907	chr8	76986296	76999990	-	76988338	76999990	3pMXE	ENST00000520203.1	known	0.1	20	181	20	181	y	0.11	29	224	29	224	y	0.12	14	98	14	98	y	0.14	26	161	26	161	y	0.16	27	138	27	138	y	0.13	23	159	23	159	y	0.0419145	3.16228	up	ENSG00000164751.15
known_NIR_7466	chr11	3040984	3042165	-	3041031	3042165	A3SS	ENST00000531387.5	known	0.88	130	18	130	18	y	0.89	109	14	109	14	y	0.86	66	11	66	11	y	0.9	102	11	102	11	y	0.92	111	10	111	10	y	0.91	117	12	117	12	y	0.0419145	3.16228	up	ENSG00000110619.18
known_NIR_28928	chr19	49663258	49665631	-	49663258;49663514	49663343;49665631	ES	ENST00000377135.8	known	0.14	71	420.5	71	766;75	y	0.11	57	471	57	855;87	y	0.12	45	344.5	45	634;55	y	0.09	46	449	46	810;88	y	0.08	45	491.5	45	876;107	y	0.1	51	472.5	51	845;100	y	0.0419145	-3.16228	down	ENSG00000126456.16
known_NIR_43936	chr6	3012674	3016884	+	3012674	3015530	3pMXE	ENST00000380472.7	known	0.17	62	294	62	294	y	0.16	65	349	65	349	y	0.15	56	311	56	311	y	0.11	47	365	47	365	y	0.13	49	332	49	332	y	0.14	47	280	47	280	y	0.0419145	-3.16228	down	ENSG00000124588.22
known_NIR_34049	chr20	45406732	45408460	+	45406210	45408460	A5SS	ENST00000372723.7	known	0.95	198	10	198	10	y	0.93	267	21	267	21	y	0.94	171	10	171	10	y	0.91	166	16	166	16	y	0.89	183	22	183	22	y	0.92	222	20	222	20	y	0.0419145	-3.16228	down	ENSG00000244274.9
novel_NIR_17329	chr13	25774959	25778617	+	25774959	25828118	A3SS	ENST00000381655.7	novel	0.06	1	16	1	16	n	0	0	1	0	1	n	0	0	6	0	6	n	0.17	1	5	1	5	n	0.23	3	10	3	10	y	-	-	-	-	-	-	0.0420207	4.9923	up	ENSG00000132932.19
known_NIR_15887	chr14	69424202	69428562	+	69424202	69442069	A3SS	ENST00000555245.5	known	0	0	18	0	18	n	0.07	2	27	2	27	y	0	0	7	0	7	n	0.12	2	15	2	15	y	0.2	4	16	4	16	y	0.1	2	19	2	19	y	0.0421104	3.03488	up	ENSG00000029364.12
known_NIR_41732	chr5	141969167	141973583	+	141970877	141973583	A5SS&ES	ENST00000506822.5	known	0.01	1	69	1	69	n	0.04	3	80	3	80	y	0	0	40	0	40	n	0.11	8	68	8	68	y	0.05	4	75	4	75	y	0.1	7	66	7	66	y	0.0421533	3.16587	up	ENSG00000013561.18
known_NIR_36448	chr3	111979203	111986264	+	111979203	111981784	3pMXE	ENST00000497293.1	known	0	0	67	0	67	n	0	0	46	0	46	n	0	0	49	0	49	n	0.05	3	54	3	54	y	0.08	3	34	3	34	y	0.04	2	49	2	49	y	0.0421585	4.71495	up	ENSG00000144827.9
known_NIR_16559	chr14	96856586;96860735	96860557;96881177	+	96856586;96876120	96876030;96881177	MXE	ENST00000681474.1	known	0.45	120.5	145.5	237;4	2;289	y	0.43	130	174	256;4	0;348	n	0.44	74	94	148;0	0;188	n	0.41	111	161	222;0	3;319	n	0.4	99.5	148	199;0	3;293	n	0.37	124.5	211.5	249;0	0;423	n	0.0421716	-3.5	down	ENSG00000100749.9
known_NIR_44930	chr6	85489599;85490657	85490508;85491977	+	85489599	85491977	cassetteExon	ENST00000369651.7	known	0.89	41.5	5	44;39	5	y	0.88	59.5	8	53;66	8	y	0.9	43.5	5	36;51	5	y	0.85	47	8	35;59	8	y	0.86	47.5	8	40;55	8	y	0.82	62.5	14	61;64	14	y	0.0421716	-3.5	down	ENSG00000135318.12
known_NIR_3553	chr1	33331462;33331699	33331625;33332275	-	33331462	33332275	cassetteExon	ENST00000431992.5	known	0.06	28.5	432	22;35	432	y	0.04	19	467	15;23	467	y	0.05	18	371	18;18	371	y	0.08	34	396	31;37	396	y	0.09	40.5	431	39;42	431	y	0.12	62	463	65;59	463	y	0.0421716	3.5	up	ENSG00000134686.19
known_NIR_19678	chr16	57055519	57058972	+	57055519;57058148	57058065;57058972	ES	ENST00000262510.10	known	0	0	37	0	25;49	n	0.03	1	39	1	27;51	n	0.04	2	46.5	2	46;47	y	0.06	2	34	2	33;35	y	0.07	2	27.5	2	31;24	y	0.08	4	45	4	44;46	y	0.0421716	3.5	up	ENSG00000140853.16
known_NIR_28838	chr19	49450939	49451485	-	49450848	49451485	A3SS	ENST00000262265.10	known	0.07	38	528	38	528	y	0.08	49	564	49	564	y	0.04	20	428	20	428	y	0.11	53	446	53	446	y	0.1	53	501	53	501	y	0.12	70	528	70	528	y	0.0421716	3.5	up	ENSG00000104872.11
known_NIR_5263	chr10	112951607	113040025	+	112951607;112964624	112964556;113040025	ES	ENST00000627217.3	known	1	7	0	7	0;0	n	0.8	2	0.5	2	0;1	n	1	6	0	6	0;0	n	0.52	6	5.5	6	6;5	y	0.78	7	2	7	2;2	y	0.56	5	4	5	8;0	n	0.0421805	-2.99054	down	ENSG00000148737.17
known_NIR_29823	chr19	8426804;8430867	8430658;8438388	+	8426804	8438388	cassetteExon	ENST00000381035.8	known	0.88	57	8	35;79	8	y	0.91	64.5	6	58;71	6	y	0.91	42	4	30;54	4	y	0.83	55	11	48;62	11	y	0.86	61.5	10	50;73	10	y	0.87	62	9	59;65	9	y	0.0422506	-2.98481	down	ENSG00000099785.11
known_NIR_4574	chr1	6628691	6630291	+	6628691	6630288	A3SS	ENST00000054650.8	known	0.1	9	84	9	84	y	0.09	7	70	7	70	y	0.13	12	83	12	83	y	0.05	4	81	4	81	y	0.08	9	103	9	103	y	0.05	7	136	7	136	y	0.0422506	-2.98481	down	ENSG00000041988.15
known_NIR_38797	chr3	49910884	49913220	-	49912011	49913220	3pMXE	ENST00000483022.5	known	0.22	38	132	38	132	y	0.25	46	137	46	137	y	0.26	37	104	37	104	y	0.2	35	138	35	138	y	0.17	33	165	33	165	y	0.21	41	150	41	150	y	0.0423157	-2.94174	down	ENSG00000164077.14
known_NIR_28243	chr19	4324197;4324529	4324455;4325216	-	4324197	4325216	cassetteExon	ENST00000601956.5	known	0.85	384.5	67	454;315	67	y	0.82	366.5	81	431;302	81	y	0.86	287	45	358;216	45	y	0.77	291	85	329;253	85	y	0.81	365	84	431;299	84	y	0.8	346.5	88	415;278	88	y	0.0423157	-2.94174	down	ENSG00000178078.12
known_NIR_27136	chr19	19635569	19636707	-	19635721	19636707	A3SS	ENST00000587713.1	known	0.4	17	25	17	25	y	0.52	31	29	31	29	y	0.5	18	18	18	18	y	0.39	15	23	15	23	y	0.31	8	18	8	18	y	0.28	8	21	8	21	y	0.0423405	-2.95976	down	ENSG00000089639.11
known_NIR_1857	chr1	171584541	171587003	+	171584526	171587003	A5SS	ENST00000647382.2	known	0.25	15	45	15	45	y	0.08	3	33	3	33	y	0.16	7	36	7	36	y	0.27	13	35	13	35	y	0.41	24	35	24	35	y	0.4	17	26	17	26	y	0.0423462	2.95	up	ENSG00000117523.17
known_NIR_1254	chr1	155324587	155324845	+	155323130	155324845	A5SS	ENST00000368352.10	known	0.93	54	4	54	4	y	1	44	0	44	0	n	1	34	0	34	0	n	0.87	34	5	34	5	y	0.83	39	8	39	8	y	0.92	45	4	45	4	y	0.0423505	-2.95573	down	ENSG00000160753.16
known_NIR_20279	chr16	68312176;68316074	68315897;68324683	+	68312176;68321462	68321426;68324683	MXE	ENST00000564441.5	known	0.26	35.5	103.5	56;15	16;191	y	0.3	35	83	63;7	0;166	n	0.24	29.5	94.5	56;3	0;189	n	0.2	23.5	97	26;21	5;189	y	0.16	17	92	27;7	2;182	y	0.22	32	110.5	47;17	12;209	y	0.0423945	-2.93987	down	ENSG00000132600.17
known_NIR_42520	chr5	32531916	32536638	+	32531916	32588512	A3SS	ENST00000506237.5	known	0.45	20	24	20	24	y	0.51	35	34	35	34	y	0.33	9	18	9	18	y	0.21	8	30	8	30	y	0.27	16	43	16	43	y	0.19	8	35	8	35	y	0.0425436	-3.55594	down	ENSG00000113387.12
known_NIR_38707	chr3	49117830	49117947	-	49117785	49117947	A3SS	ENST00000398896.5	known	0.7	19	8	19	8	y	0.78	21	6	21	6	y	0.86	25	4	25	4	y	0.43	10	13	10	13	y	0.65	26	14	26	14	y	0.54	20	17	20	17	y	0.0425911	-3.05623	down	ENSG00000172046.19
novel_NIR_1219	chr1	153601674	153606172	-	153589876	153606172	A3SS	ENST00000647794.1	novel	-	-	-	-	-	-	0	0	8	0	8	n	0	0	4	0	4	n	0.25	2	6	2	6	y	0.31	5	11	5	11	y	0.5	2	2	2	2	y	0.0425942	4.68916	up	ENSG00000285867.1
novel_NIR_32573	chr19	21182768	21189865	+	21184597	21189865	5pMXE	ENST00000593426.1	novel	0.5	2	2	2	2	y	0.38	3	5	3	5	y	0	0	4	0	4	n	1	3	0	3	0	y	1	1	0	1	0	n	1	5	0	5	0	y	0.0425942	4.68916	up	ENSG00000196705.8
known_NIR_11888	chr12	49103813;49105957	49105924;49106961	-	49103813;49104885	49104448;49106961	MXE	ENST00000457164.6	known	0.6	29.5	19.5	3;56	35;4	y	0.69	31.5	14	7;56	28;0	n	0.62	16	10	0;32	19;1	n	0.53	23.5	20.5	2;45	40;1	n	0.55	29	23.5	3;55	43;4	y	0.44	22.5	28.5	0;45	51;6	n	0.0426025	-2.99116	down	ENSG00000139636.16
known_NIR_11908	chr12	49325560	49325747	+	49325658	49325747	A5SS	ENST00000551245.5	known	0	0	34	0	34	n	0.04	2	46	2	46	y	0.02	1	43	1	43	n	0.06	2	31	2	31	y	0.1	5	44	5	44	y	0.13	7	48	7	48	y	0.0426026	3.28571	up	ENSG00000135451.13
known_NIR_39827	chr4	139062057	139071866	-	139062057;139067770	139067684;139071866	ES	ENST00000394235.6	known	0.08	1	11.5	1	16;7	n	0.15	2	11.5	2	9;14	y	0.06	1	14.5	1	19;10	n	0.22	2	7	2	6;8	y	0.17	2	9.5	2	4;15	y	0.21	3	11.5	3	9;14	y	0.0426079	3.30461	up	ENSG00000109381.20
novel_NIR_16221	chr12	6448737	6451363	-	6448737	6450474	A5SS&ES	ENST00000536388.5	novel	0	0	15	0	15	n	0.2	2	8	2	8	y	0.17	1	5	1	5	n	0.33	2	4	2	4	y	0.5	3	3	3	3	y	0.68	13	6	13	6	y	0.0426194	3.20144	up	ENSG00000215039.7
known_NIR_46856	chr7	44074530	44078756	-	44076629	44078756	3pMXE	ENST00000492605.5	known	0	0	5	0	5	n	0.5	4	4	4	4	n	0	0	2	0	2	n	1	2	0	2	0	n	-	-	-	-	-	-	0.75	9	3	9	3	y	0.042667	3.4	up	ENSG00000122678.17
novel_NIR_10740	chr11	46948164	47052388	+	47023394	47052388	A5SS&ES	ENST00000525279.5	novel	0	0	2	0	2	n	0.5	2	2	2	2	y	0	0	4	0	4	n	0.75	6	2	6	2	y	-	-	-	-	-	-	1	7	0	7	0	y	0.042667	3.4	up	ENSG00000149179.14
novel_NIR_53833	chr5	94989271	95017367	-	94953361	95017367	A3SS	ENST00000515393.5	novel	0	0	2	0	2	n	0.5	8	8	8	8	y	0	0	3	0	3	n	1	6	0	6	0	y	-	-	-	-	-	-	0.75	6	2	6	2	y	0.042667	3.4	up	ENSG00000175471.19
known_NIR_1487	chr1	156787174	156791067	+	156787174	156794665	A3SS	ENST00000526188.5	known	0.73	16	6	16	6	y	0.59	19	13	19	13	y	0.68	15	7	15	7	y	0.56	18	14	18	14	y	0.52	16	15	16	15	y	0.44	7	9	7	9	y	0.042707	-2.95981	down	ENSG00000143294.15
novel_NIR_18773	chr14	24150888	24151182	+	24150888	24151299	A3SS	ENST00000560787.5	novel	0.64	7	4	7	4	y	0.44	4	5	4	5	y	0.56	5	4	5	4	y	0	0	7	0	7	n	0	0	12	0	12	n	0.34	10	19	10	19	y	0.0427386	-3.40226	down	ENSG00000092098.17
novel_NIR_65495	chr9	130107539	130108067	+	130107539	130110370	A3SS	ENST00000372406.5	novel	0.29	9	22	9	22	y	0.53	25	22	25	22	y	0.52	14	13	14	13	y	0.12	4	29	4	29	n	0.2	4	16	4	16	y	0.09	3	30	3	30	n	0.0427574	-3.64776	down	ENSG00000148358.20
known_NIR_16604	chr15	22812253;22814153	22814083;22820313	+	22812253	22820313	cassetteExon	ENST00000437912.6	known	0.5	2	2	4;0	2	n	0.41	5.5	8	7;4	8	y	0.3	3	7	4;2	7	y	0.08	0.5	6	1;0	6	n	0.2	1.5	6	3;0	6	n	0.25	1	3	1;1	3	n	0.0427766	-2.95373	down	ENSG00000170113.16
known_NIR_35283	chr22	20052584;20053551	20053437;20055943	+	20052584	20055943	cassetteExon	ENST00000471707.5	known	0.39	28	43	32;24	43	y	0.51	38	36	42;34	36	y	0.47	31	35	30;32	35	y	0.23	18	61	22;14	61	y	0.32	23.5	51	18;29	51	y	0.36	26.5	47	20;33	47	y	0.0428235	-2.93883	down	ENSG00000183597.16
known_NIR_9183	chr11	67431515	67432353	+	67431515	67432356	A3SS	ENST00000556575.5	known	0.25	5	15	5	15	y	0.38	10	16	10	16	y	0.38	5	8	5	8	y	0.56	18	14	18	14	y	0.57	13	10	13	10	y	0.43	6	8	6	8	y	0.0428325	2.93151	up	ENSG00000175634.15
novel_NIR_12783	chr12	101726497	101728901	+	101726404	101728901	A5SS	ENST00000229266.8	novel	0.16	120	643	120	643	y	0.12	93	652	93	652	n	0.12	71	498	71	498	n	0.18	140	645	140	645	y	0.17	129	629	129	629	y	0.2	177	726	177	726	y	0.0428328	3.12772	up	ENSG00000111666.11
known_NIR_47594	chr7	79453789	79458847	+	79453655	79458847	A5SS	ENST00000446159.5	known	0.4	2	3	2	3	n	0.18	2	9	2	9	y	0.33	2	4	2	4	n	0	0	12	0	12	n	0	0	15	0	15	n	0	0	4	0	4	n	0.0428474	-4.67436	down	ENSG00000234456.9
known_NIR_30438	chr2	169630987;169631647	169631599;169631766	+	169630987	169631766	cassetteExon	ENST00000414307.6	known	0.12	2	14	2;2	14	y	0.03	0.5	15	0;1	15	n	0	0	4	0;0	4	n	0.17	4	19	0;8	19	n	0.15	3	17	4;2	17	y	0.25	2	6	2;2	6	y	0.0428559	2.96245	up	ENSG00000138398.17
novel_NIR_65974	chr9	21971208	21993886	-	21971208	21993882	A5SS	ENST00000494262.5	novel	0.41	7	10	7	10	y	0.21	9	34	9	34	y	0.3	8	19	8	19	y	0.11	3	25	3	25	n	0	0	20	0	20	n	0.15	8	44	8	44	y	0.0428793	-3.00622	down	ENSG00000147889.18
known_NIR_36105	chr22	42161358;42168703	42168609;42169847	-	42161358	42169847	cassetteExon	ENST00000335626.8	known	0.34	40	77	68;12	77	y	0.28	31.5	81	49;14	81	y	0.27	25.5	70	41;10	70	y	0.24	27	86	44;10	86	y	0.14	17	106	28;6	106	y	0.18	19	87	31;7	87	y	0.0428915	-3.02511	down	ENSG00000100207.21
known_NIR_42208	chr5	177539147	177553168	-	177539042	177553168	A3SS	ENST00000510429.1	known	1	14	0	14	0	n	1	2	0	2	0	n	1	6	0	6	0	n	0.91	10	1	10	1	n	0.83	5	1	5	1	n	0.8	8	2	8	2	y	0.0429121	-4.67059	down	ENSG00000146067.16
known_NIR_39627	chr4	105700014	105708638	-	105700014;105703809	105703648;105708638	ES	ENST00000340139.10	known	0.47	18	20.5	18	24;17	y	0.44	29	37.5	29	50;25	y	0.48	20	22	20	32;12	y	0.26	10	29	10	44;14	y	0.38	12	20	12	36;4	y	0.27	13	35	13	53;17	y	0.042946	-3.97251	down	ENSG00000138785.15
novel_NIR_3036	chr1	211260164	211260866	+	211260164	211271232	A3SS	ENST00000534478.5	novel	0.11	2	16	2	16	n	0.11	2	16	2	16	n	0.2	2	8	2	8	y	0	0	6	0	6	n	0	0	7	0	7	n	0	0	9	0	9	n	0.0429797	-4.66667	down	ENSG00000117625.14
known_NIR_44648	chr6	43497977	43498975	+	43497977	43498978	A3SS	ENST00000372444.6	known	0.45	49	61	49	61	y	0.52	53	49	53	49	y	0.48	28	30	28	30	y	0.53	50	44	50	44	y	0.58	52	37	52	37	y	0.57	50	38	50	38	y	0.0430525	3.02005	up	ENSG00000137221.14
known_NIR_42637	chr5	477849	479866	+	477849	479782	A3SS	ENST00000607286.5	known	0.71	5	2	5	2	n	0.71	5	2	5	2	n	0.46	6	7	6	7	y	0.82	14	3	14	3	y	1	2	0	2	0	n	1	9	0	9	0	n	0.0430721	3.05137	up	ENSG00000225138.8
known_NIR_11452	chr12	25203832	25203920	+	25195341	25203920	A5SS	ENST00000557540.7	known	0.42	8	11	8	11	y	0.22	5	18	5	18	y	0	0	4	0	4	n	0.71	10	4	10	4	y	0.67	8	4	8	4	y	0.79	11	3	11	3	y	0.0430937	4.03752	up	ENSG00000205707.11
known_NIR_6457	chr10	97459505	97459659	-	97459526	97459659	A3SS	ENST00000495415.5	known	0.02	8	365	8	365	y	0	0	333	0	333	n	0.02	7	316	7	316	y	0.03	10	321	10	321	y	0.06	16	261	16	261	y	0.05	15	307	15	307	y	0.043162	3.01511	up	ENSG00000155229.21
known_NIR_44135	chr6	3155055	3155625	-	3154923	3155625	A3SS	ENST00000679400.1	known	0.01	2	223	2	223	y	0.03	9	288	9	288	y	0.03	7	219	7	219	y	0.04	8	199	8	199	y	0.06	16	267	16	267	y	0.07	22	284	22	284	y	0.043162	3.01511	up	ENSG00000137267.7
known_NIR_34333	chr20	50940955;50941209	50941105;50942031	-	50940955	50942031	cassetteExon	ENST00000466152.5	known	1	50.5	0	2;99	0	n	1	42	0	1;83	0	n	0.94	43.5	3	0;87	3	n	0.83	44	9	0;88	9	n	0.92	45	4	0;90	4	n	0.89	66	8	2;130	8	y	0.043162	-3.01511	down	ENSG00000000419.14
known_NIR_28310	chr19	44165807	44169565	+	44165807	44166705	A3SS&ES	ENST00000585560.5	known	0.75	6	2	6	2	n	1	8	0	8	0	n	0.6	3	2	3	2	n	0.5	5	5	5	5	y	0.33	7	14	7	14	y	0.2	2	8	2	8	y	0.0431669	-3.02511	down	ENSG00000167380.17
novel_NIR_25489	chr16	84981994	84988544	-	84981994	84990304	A5SS	ENST00000313732.9	novel	0.14	4	25	4	25	n	0.23	11	37	11	37	y	0.12	4	28	4	28	n	0	0	29	0	29	n	0.08	2	23	2	23	n	0.03	1	34	1	34	n	0.043186	-3.08221	down	ENSG00000153786.13
known_NIR_11699	chr12	43768272;43771365	43771220;43772180	+	43768272	43772180	cassetteExon	ENST00000431837.5	known	1	7.5	0	6;9	0	n	1	8.5	0	5;12	0	n	1	2	0	1;3	0	n	0.33	2	4	4;0	4	n	0.67	4	2	4;4	2	y	0.58	5.5	4	0;11	4	n	0.0432014	-4.65386	down	ENSG00000198001.14
known_NIR_49830	chr8	67172555	67175296	+	67172973	67175296	5pMXE	ENST00000676980.1	known	0.9	38	4	38	4	y	0.95	40	2	40	2	y	0.88	14	2	14	2	y	1	31	0	31	0	n	0.97	28	1	28	1	n	1	54	0	54	0	n	0.0432425	3.4641	up	ENSG00000104218.16
novel_NIR_6595	chr10	101062115	101064261	+	101062115;101063103	101062542;101064261	ES	ENST00000370200.6	novel	0.2	10	41	10	46;36	y	0.14	6	37	6	45;29	n	0.2	8	32.5	8	32;33	y	0.05	2	40	2	50;30	n	0.04	2	51	2	58;44	n	0.13	6	41.5	6	52;31	n	0.0432881	-3.06504	down	ENSG00000107821.15
known_NIR_10128	chr12	102046119;102050291	102050189;102061248	-	102046119	102061248	cassetteExon	ENST00000240079.11	known	0.01	1.5	141	1;2	141	n	0.05	7.5	140	7;8	140	y	0.03	4	126	5;3	126	y	0.08	17.5	203	20;15	203	y	0.08	12.5	137	11;14	137	y	0.06	11	185	12;10	185	y	0.0433079	3.25	up	ENSG00000120860.11
known_NIR_15999	chr14	73955928	73962970	+	73955928	73958147	A3SS&ES	ENST00000554341.6	known	0.03	2	77	2	77	y	0.07	5	69	5	69	y	0.05	3	57	3	57	y	0	0	72	0	72	n	0.02	1	56	1	56	n	0	0	67	0	67	n	0.0433079	-3.25	down	ENSG00000119723.17
known_NIR_24848	chr17	81908634	81909514	-	81908634;81909321	81908876;81909514	ES	ENST00000331285.7	known	0.01	1	153.5	1	304;3	n	0.03	5	162	5	317;7	y	0.05	8	142	8	278;6	y	0.08	15	165	15	327;3	y	0.06	10	164.5	10	322;7	y	0.08	14	151.5	14	297;6	y	0.0433079	3.25	up	ENSG00000185813.11
known_NIR_45505	chr7	106775200	106775959	+	106775200	106779995	A3SS	ENST00000650196.1	known	0.7	30	13	30	13	y	0.7	19	8	19	8	y	0.63	19	11	19	11	y	0.75	43	14	43	14	y	0.87	39	6	39	6	y	0.8	40	10	40	10	y	0.0433218	3.10267	up	ENSG00000228742.11
known_NIR_39778	chr4	127938838	127942045	-	127938838;127939997	127939853;127942045	ES	ENST00000296468.8	known	0.27	3	8	3	16;0	n	0.14	2	12.5	2	14;11	y	0.32	3	6.5	3	4;9	y	0.04	1	25	1	26;24	n	0	0	17.5	0	20;15	n	0	0	16	0	14;18	n	0.0433946	-4.16086	down	ENSG00000164073.11
known_NIR_51676	chrX	107069402	107113397	-	107088839	107113397	A3SS&ES	ENST00000495517.5	known	0.17	2	10	2	10	y	0.2	2	8	2	8	y	0.22	2	7	2	7	n	0.1	1	9	1	9	n	0.1	1	9	1	9	n	0	0	4	0	4	n	0.0434321	-3.57512	down	ENSG00000089682.16
known_NIR_52134	chrX	154032557	154056941	-	154032557	154097604	A5SS	ENST00000453960.7	known	0.52	25	23	25	23	y	0.71	20	8	20	8	y	0.72	21	8	21	8	y	0.33	10	20	10	20	y	0.45	21	26	21	26	y	0.44	15	19	15	19	y	0.0435016	-3.21989	down	ENSG00000169057.24
known_NIR_2048	chr1	19324762	19325526	+	19324762	19325495	A3SS	ENST00000375155.7	known	0.16	31	162	31	162	y	0.15	31	175	31	175	y	0.22	33	115	33	115	y	0.1	20	172	20	172	y	0.06	14	212	14	212	y	0.12	30	218	30	218	y	0.0435923	-2.96695	down	ENSG00000040487.13
novel_NIR_44836	chr3	119619652	119620819	+	119619652	119620076	3pMXE	ENST00000475963.1	novel	0	0	9	0	9	n	0.07	1	14	1	14	n	0	0	4	0	4	n	0.27	3	8	3	8	y	0.43	3	4	3	4	y	0.2	4	16	4	16	y	0.0436721	3.8449	up	ENSG00000144837.9
known_NIR_17972	chr15	82754784	82756904	+	82754784;82756785	82756730;82756904	ES	ENST00000561107.5	known	0.37	28	48	28	52;44	y	0.47	31	34.5	31	31;38	y	0.49	27	28	27	29;27	y	0.28	15	39.5	15	29;50	y	0.36	20	35.5	20	37;34	y	0.27	17	45	17	50;40	y	0.0437062	-2.99238	down	ENSG00000250988.7
novel_NIR_1105	chr1	151540426;151561856	151561718;151562091	+	151540426	151562091	cassetteExon	ENST00000368849.8	novel	0.3	6	14	7;5	14	y	0.33	2	4	0;4	4	n	0.14	0.5	3	0;1	3	n	0	0	17	0;0	17	n	0.07	1	14	2;0	14	n	0	0	13	0;0	13	n	0.0437516	-3.67912	down	ENSG00000143367.16
novel_NIR_22866	chr16	18375069	18376953	-	18375069;18376862	18376736;18376953	ES	ENST00000546267.5	novel	0	0	33	0	7;59	n	0	0	33	0	21;45	n	0	0	37.5	0	16;59	n	0.22	10	36.5	10	16;57	y	0.1	4	36	4	8;64	n	0.16	6	32.5	6	11;54	y	0.0438171	4.6188	up	ENSG00000233024.7
known_NIR_18992	chr16	2969840	2971157	+	2969840	2971274	A3SS	ENST00000293978.12	known	0.89	41	5	41	5	y	0.89	42	5	42	5	y	0.94	44	3	44	3	y	0.84	32	6	32	6	y	0.79	22	6	22	6	y	0.73	36	13	36	13	y	0.0438328	-3.34252	down	ENSG00000162073.14
known_NIR_36413	chr3	10279063	10279221	+	10279034	10279221	A5SS	ENST00000287652.8	known	0.15	28	164	28	164	y	0.19	39	171	39	171	y	0.22	31	109	31	109	y	0.07	15	202	15	202	y	0.1	16	149	16	149	y	0.14	30	184	30	184	y	0.0438451	-2.90619	down	ENSG00000157014.11
known_NIR_28226	chr19	42510920	42512350	-	42510920;42511628	42511576;42512350	ES	ENST00000352591.9	known	0.53	174	151.5	174	147;156	y	0.57	185	137.5	185	147;128	y	0.61	156	101	156	116;86	y	0.64	192	106	192	104;108	y	0.68	181	86.5	181	93;80	y	0.75	244	80.5	244	82;79	y	0.043916	3.03175	up	ENSG00000079385.23
novel_NIR_25246	chr16	75641723	75647464	-	75641723	75642753	A5SS&ES	ENST00000568682.5	novel	0.43	3	4	3	4	y	0	0	4	0	4	n	0.33	1	2	1	2	n	0.86	12	2	12	2	y	0.75	3	1	3	1	y	0.67	4	2	4	2	y	0.0439394	3.59066	up	ENSG00000065427.15
known_NIR_6921	chr11	124625903	124626473	+	124625903	124626813	A3SS	ENST00000473629.6	known	0.81	21	5	21	5	y	0.75	30	10	30	10	y	0.83	25	5	25	5	y	0.9	36	4	36	4	y	0.86	42	7	42	7	y	0.9	37	4	37	4	y	0.0439777	3.27423	up	ENSG00000154144.13
known_NIR_7774	chr11	36594641	36610081	+	36594915	36610081	A5SS	ENST00000617650.5	known	0.9	27	3	27	3	y	1	21	0	21	0	n	0.92	24	2	24	2	y	0.85	23	4	23	4	y	0.82	18	4	18	4	y	0.8	36	9	36	9	y	0.0440815	-3.44865	down	ENSG00000166352.18
novel_NIR_31502	chr19	10353929	10354042	-	10350968	10354042	A3SS	ENST00000530560.5	novel	0.56	5	4	5	4	y	0.5	2	2	2	2	y	0.25	1	3	1	3	n	0	0	3	0	3	n	0	0	5	0	5	n	0	0	2	0	2	n	0.044152	-4.60003	down	ENSG00000105397.14
known_NIR_44926	chr6	84444451	84470791	-	84444451	84556019	A5SS	ENST00000454172.5	known	0.45	10	12	10	12	y	0.52	13	12	13	12	y	0.62	15	9	15	9	y	0.39	9	14	9	14	y	0.2	6	24	6	24	y	0.34	19	37	19	37	y	0.044188	-2.92253	down	ENSG00000231776.5
known_NIR_41266	chr5	132218644;132227258	132227086;132227790	-	132218644	132227790	cassetteExon	ENST00000360568.8	known	0.62	44	27	81;7	27	y	0.56	37	29	71;3	29	y	0.52	25	23	49;1	23	n	0.46	31	37	54;8	37	y	0.43	31.5	41	60;3	41	y	0.48	33.5	36	62;5	36	y	0.0442056	-3.38573	down	ENSG00000072682.20
novel_NIR_21319	chr15	59642262	59650355	-	59642262	59652206	A5SS	ENST00000484743.5	novel	0	0	8	0	8	n	0	0	6	0	6	n	0.5	1	1	1	1	n	0.8	8	2	8	2	y	1	4	0	4	0	n	0.57	4	3	4	3	n	0.0442101	2.99863	up	ENSG00000140307.11
known_NIR_9347	chr11	69294576	69295327	+	69294576	69295233	A3SS	ENST00000441339.3	known	0.3	34	81	34	81	y	0.32	37	77	37	77	y	0.34	27	52	27	52	y	0.36	48	87	48	87	y	0.35	46	87	46	87	y	0.38	35	56	35	56	y	0.0442361	2.9824	up	ENSG00000172927.8
known_NIR_10993	chr12	122975383	122975811	+	122975121	122975811	A5SS	ENST00000397389.6	known	0.35	36	66	36	66	y	0.46	42	50	42	50	y	0.34	18	35	18	35	y	0.18	16	72	16	72	y	0.29	26	65	26	65	y	0.24	21	66	21	66	y	0.0442433	-2.93987	down	ENSG00000111325.16
known_NIR_27650	chr19	37771696	37773661	-	37771696;37772982	37772938;37773661	ES	ENST00000589632.5	known	0.59	5	3.5	5	4;3	y	0.81	24	5.5	24	6;5	y	0.62	5	3	5	0;6	n	0.82	14	3	14	3;3	y	1	12	0	12	0;0	n	1	4	0	4	0;0	n	0.0442719	2.91924	up	ENSG00000189144.15
known_NIR_3439	chr1	32230376	32230927	+	32228816	32230927	A5SS	ENST00000677767.1	known	0.05	1	18	1	18	n	0.07	3	42	3	42	y	0.11	4	32	4	32	y	0	0	32	0	32	n	0	0	34	0	34	n	0.02	1	46	1	46	n	0.0442828	-3.71231	down	ENSG00000084623.12
novel_NIR_13744	chr12	122064682	122068041	+	122064682	122065256	3pMXE	ENST00000423999.2	novel	1	1	0	1	0	n	0.42	5	7	5	7	y	0.75	3	1	3	1	y	0.3	3	7	3	7	y	0	0	5	0	5	n	0	0	4	0	4	n	0.04433	-3.18879	down	ENSG00000256546.2
known_NIR_19985	chr16	66552793	66565886	+	66552793	66563072	A3SS&ES	ENST00000534692.1	known	0.55	12	10	12	10	y	0.75	27	9	27	9	y	0.76	16	5	16	5	y	0.96	23	1	23	1	n	0.86	12	2	12	2	y	1	10	0	10	0	n	0.0444199	3.16392	up	ENSG00000217555.13
known_NIR_35748	chr22	32475398	32478981	+	32475398	32479133	A3SS	ENST00000452138.3	known	0.6	18	12	18	12	y	0.45	10	12	10	12	y	0.33	8	16	8	16	y	0.75	18	6	18	6	y	0.88	21	3	21	3	y	0.65	22	12	22	12	y	0.0444354	2.92306	up	ENSG00000100225.18
known_NIR_17188	chr15	60386086	60397871	-	60386086	60393013	A5SS&ES	ENST00000678450.1	known	0.98	41	1	41	1	n	0.87	40	6	40	6	y	0.86	30	5	30	5	y	0.51	29	28	29	28	y	0.73	16	6	16	6	y	0.7	40	17	40	17	y	0.0444503	-3.25384	down	ENSG00000182718.18
novel_NIR_61033	chr7	87163617	87163887	+	87163617	87164934	A3SS	ENST00000413276.6	novel	0	0	2	0	2	n	0.25	1	3	1	3	n	0.38	3	5	3	5	y	0.46	6	7	6	7	y	0.67	8	4	8	4	y	0.78	14	4	14	4	y	0.0444653	2.92729	up	ENSG00000135164.19
known_NIR_4874	chr1	93594449	93600656	+	93594449	93605406	A3SS	ENST00000417401.1	known	0.53	9	8	9	8	y	0.22	4	14	4	14	y	0.4	6	9	6	9	y	1	3	0	3	0	n	0.88	15	2	15	2	y	0.6	12	8	12	8	y	0.0444912	2.98068	up	ENSG00000224093.5
known_NIR_40259	chr4	23083788	23095239	+	23083788	23120320	A3SS	ENST00000659942.1	known	0.2	1	4	1	4	n	0.36	4	7	4	7	y	0.67	4	2	4	2	n	1	6	0	6	0	n	0.8	4	1	4	1	n	1	11	0	11	0	n	0.0445311	3.41547	up	ENSG00000248837.7
known_NIR_3318	chr1	30719232	30721288	+	30719565	30721288	A5SS	ENST00000454613.1	known	0.25	2	6	2	6	n	0.5	2	2	2	2	n	0.4	2	3	2	3	n	0.62	8	5	8	5	y	1	5	0	5	0	n	0.76	13	4	13	4	y	0.0445553	3.09147	up	ENSG00000186056.10
known_NIR_11820	chr12	48815728;48816995	48816873;48823344	+	48815728	48823344	cassetteExon	ENST00000536187.6	known	0	0	2	0;0	2	n	0.05	1	18	1;1	18	n	0.12	2	14	1;3	14	n	0.25	5	15	4;6	15	y	0.17	2	10	0;4	10	n	0.36	4.5	8	0;9	8	n	0.0446717	3.12103	up	ENSG00000167535.8
novel_NIR_11834	chr11	67353077	67367460	-	67353077	67353294	5pMXE	ENST00000530584.5	novel	0.29	12	30	12	30	y	0.21	13	49	13	49	y	0.24	14	44	14	44	y	0.09	4	39	4	39	n	0.19	14	61	14	61	y	0.09	3	31	3	31	n	0.0447342	-3.03116	down	ENSG00000175482.9
novel_NIR_46663	chr3	197008962	197009618	-	197008965	197009618	A3SS	ENST00000296350.10	novel	0.12	16	114	16	114	n	0.12	13	93	13	93	n	0.11	10	84	10	84	n	0.19	19	83	19	83	y	0.15	21	116	21	116	y	0.16	22	114	22	114	y	0.044741	4.00892	up	ENSG00000163975.12
known_NIR_49185	chr8	144802947	144804125	+	144802947;144803767	144803641;144804125	ES	ENST00000533965.5	known	0.19	2	8.5	2	10;7	y	0.08	1	11	1	11;11	n	0.18	2	9	2	8;10	y	0	0	9.5	0	5;14	n	0.05	1	20	1	27;13	n	0	0	14	0	11;17	n	0.0447417	-3.42997	down	ENSG00000197363.10
novel_NIR_60064	chr7	50756056	50761721	-	50756056	50779135	A5SS	ENST00000470992.5	novel	0.33	3	6	3	6	y	-	-	-	-	-	-	0.38	3	5	3	5	y	-	-	-	-	-	-	0	0	1	0	1	n	0	0	2	0	2	n	0.0447585	-14.2	down	ENSG00000106070.20
known_NIR_35291	chr22	20052584;20061681	20061530;20063338	+	20052584;20056013	20055943;20063338	MXE	ENST00000444651.5	known	0.32	10.5	22.5	6;15	43;2	y	0.32	9	19.5	4;14	36;3	y	0.43	13.5	18	5;22	35;1	n	0.19	7.5	33	2;13	61;5	y	0.21	7	27	4;10	51;3	y	0.19	6	26	2;10	47;5	y	0.0447654	-4.29325	down	ENSG00000183597.16
novel_NIR_11863	chr11	67585241	67586107	+	67585241	67586389	A3SS	ENST00000398603.6	novel	0.67	16	8	16	8	y	0.68	17	8	17	8	y	0.86	6	1	6	1	n	0.31	4	9	4	9	y	0.47	8	9	8	9	y	0.57	8	6	8	6	y	0.0447709	-2.93428	down	ENSG00000084207.18
novel_NIR_48480	chr3	9792975	9797659	+	9793181	9797659	5pMXE	ENST00000433034.1	novel	0.5	2	2	2	2	y	0.36	5	9	5	9	y	-	-	-	-	-	-	0.22	2	7	2	7	y	0	0	5	0	5	n	0	0	4	0	4	n	0.0447844	-3.51814	down	ENSG00000241553.13
known_NIR_35272	chr22	20037094	20043355	+	20036854	20043355	A5SS	ENST00000471707.5	known	0.37	26	44	26	44	y	0.41	27	39	27	39	y	0.44	28	35	28	35	y	0.2	10	39	10	39	y	0.33	19	38	19	38	y	0.27	17	46	17	46	y	0.0448297	-3.27965	down	ENSG00000183597.16
known_NIR_19501	chr16	4714186	4724750	-	4717553	4724750	3pMXE	ENST00000591281.5	known	0.83	35	7	35	7	y	0.88	42	6	42	6	y	0.92	23	2	23	2	y	0.97	37	1	37	1	n	1	49	0	49	0	n	0.95	37	2	37	2	y	0.0448548	3.2423	up	ENSG00000168096.15
known_NIR_8178	chr11	532755	533277	-	532630	533277	A3SS	ENST00000397594.6	known	0.85	39	7	39	7	y	0.88	37	5	37	5	y	0.78	56	16	56	16	y	0.75	41	14	41	14	y	0.63	37	22	37	22	y	0.72	41	16	41	16	y	0.0448617	-2.92857	down	ENSG00000174775.18
known_NIR_3757	chr1	40040783;40041493	40041429;40059334	+	40040783	40059334	cassetteExon	ENST00000372802.5	known	0.17	3	15	3;3	15	y	0.13	1.5	10	0;3	10	n	0.17	2	10	0;4	10	n	0.4	8	12	0;16	12	n	0.29	5	12	0;10	12	n	0.27	4	11	2;6	11	y	0.0448619	3.83798	up	ENSG00000131236.18
novel_NIR_39621	chr2	74472252	74472455	-	74472252	74472569	A5SS	ENST00000409710.1	novel	0.29	4	10	4	10	y	0.43	10	13	10	13	y	0.56	5	4	5	4	y	0.13	3	20	3	20	n	0.12	2	15	2	15	n	0.06	1	15	1	15	n	0.0448796	-3.99343	down	ENSG00000204822.7
known_NIR_40167	chr4	185346650;185351609	185351445;185353485	+	185346650	185353485	cassetteExon	ENST00000618785.4	known	0.81	12.5	3	9;16	3	y	0.9	19	2	20;18	2	y	0.88	7.5	1	5;10	1	n	1	9	0	8;10	0	n	0.92	22.5	2	2;43	2	y	1	14.5	0	4;25	0	n	0.0448955	2.88322	up	ENSG00000109762.16
known_NIR_47312	chr7	66769025	66771883	+	66769025;66770467	66770323;66771883	ES	ENST00000442563.5	known	0.44	6	7.5	6	6;9	y	0.83	5	1	5	2;0	n	0.5	2	2	2	0;4	n	0.17	1	5	1	2;8	n	0.26	3	8.5	3	8;9	y	0	0	5	0	5;5	n	0.0449353	-3.11881	down	ENSG00000154710.18
novel_NIR_62872	chr8	143586849	143596842	-	143586849	143593893	A5SS&ES	ENST00000419152.7	novel	0	0	11	0	11	n	0	0	7	0	7	n	-	-	-	-	-	-	1	1	0	1	0	n	1	1	0	1	0	n	0.46	6	7	6	7	y	0.0449608	4.55556	up	ENSG00000104529.18
novel_NIR_40556	chr20	28600461;28600719	28600591;28601603	-	28600461	28601603	cassetteExon	ENST00000650751.1	novel	0.75	3	1	6;0	1	n	1	1.5	0	3;0	0	n	0.6	3	2	5;1	2	n	0.38	2.5	4	5;0	4	n	0.43	6	8	8;4	8	y	0.23	1.5	5	3;0	5	n	0.0449944	-3.3274	down	ENSG00000282826.2
known_NIR_16394	chr14	91114994	91157639	+	91114528	91157639	A5SS	ENST00000521081.5	known	0.25	4	12	4	12	y	0.33	3	6	3	6	n	0.4	4	6	4	6	y	0.89	8	1	8	1	n	0.68	19	9	19	9	y	0.55	6	5	6	5	y	0.0450718	3.51477	up	ENSG00000133943.21
novel_NIR_60652	chr7	73692646;73694029	73693992;73697605	+	73692646	73697605	cassetteExon	ENST00000453316.1	novel	0.25	6.5	19	13;0	19	n	0.23	7	23	9;5	23	y	0.13	1.5	10	1;2	10	n	0	0	27	0;0	27	n	0.12	2	15	4;0	15	n	0.05	1	18	2;0	18	n	0.0451208	-2.88254	down	ENSG00000071462.12
known_NIR_16859	chr15	42515354	42545136	+	42515354	42528262	3pMXE	ENST00000561526.5	known	0.09	4	40	4	40	y	0.1	4	37	4	37	y	0.08	4	44	4	44	y	0.01	1	68	1	68	n	0.06	3	50	3	50	y	0.03	2	78	2	78	y	0.0451284	-3.62441	down	ENSG00000092531.10
known_NIR_20335	chr16	69368482;69368595	69368587;69370483	-	69368482	69370483	cassetteExon	ENST00000254942.8	known	0.12	14	103	12;16	103	y	0.13	14.5	93	11;18	93	y	0.11	8.5	66	7;10	66	y	0.06	7.5	113	6;9	113	y	0.09	7.5	72	8;7	72	y	0.04	2.5	64	3;2	64	y	0.0451284	-3.62441	down	ENSG00000132604.11
known_NIR_28129	chr19	4179286;4180909	4180782;4182474	-	4179286	4182474	cassetteExon	ENST00000599365.5	known	0.99	211	3	249;173	3	y	0.97	214	7	245;183	7	y	0.94	189	12	211;167	12	y	0.92	222.5	19	265;180	19	y	0.91	211	20	237;185	20	y	0.9	216.5	24	268;165	24	y	0.0451284	-3.62441	down	ENSG00000077463.15
known_NIR_50631	chr9	129503139	129503323	+	129491128	129503323	A5SS	ENST00000671609.1	known	0.95	36	2	36	2	y	1	28	0	28	0	n	1	21	0	21	0	n	0.91	20	2	20	2	y	0.81	17	4	17	4	y	0.89	16	2	16	2	y	0.0452218	-3.25661	down	ENSG00000204054.14
known_NIR_32842	chr2	85402158	85413143	-	85402158	85418267	A5SS	ENST00000409275.1	known	0.93	26	2	26	2	y	0.93	56	4	56	4	y	0.95	35	2	35	2	y	1	35	0	35	0	n	1	49	0	49	0	n	0.96	67	3	67	3	y	0.0452347	3.3541	up	ENSG00000042493.16
known_NIR_1947	chr1	179083053;179085893	179085769;179087911	+	179083053	179087911	cassetteExon	ENST00000472001.1	known	0.86	147	23	2;292	23	y	0.88	148	20	2;294	20	y	0.87	109	17	0;218	17	n	0.92	120	11	2;238	11	y	0.91	142	14	6;278	14	y	0.96	153	7	4;302	7	y	0.0453176	3.67423	up	ENSG00000186283.14
known_NIR_8256	chr11	57673194	57688508	+	57673194;57682543	57682422;57688508	ES	ENST00000287169.8	known	0.05	3	55	3	61;49	y	0.06	4	63.5	4	71;56	y	0.1	6	56	6	64;48	y	0.02	1	65	1	63;67	n	0	0	57	0	72;42	n	0.01	1	81.5	1	113;50	n	0.0453176	-3.67423	down	ENSG00000156599.11
known_NIR_10175	chr12	103953534	103956631	-	103954968	103956631	3pMXE	ENST00000546819.1	known	0.94	33	2	33	2	y	0.98	50	1	50	1	n	0.93	41	3	41	3	y	0.88	44	6	44	6	y	0.9	54	6	54	6	y	0.89	68	8	68	8	y	0.0453176	-3.67423	down	ENSG00000204954.10
known_NIR_37750	chr3	191425604;191557384	191557262;191569600	+	191425604;191568341	191568206;191569600	MXE	ENST00000664732.1	known	0.65	14	7.5	16;12	0;15	n	0.7	14	6	11;17	0;12	n	0.56	10	8	14;6	0;16	n	0.74	12.5	4.5	16;9	0;9	n	0.86	15	2.5	26;4	0;5	n	0.78	20	5.5	23;17	2;9	y	0.0453749	2.89814	up	ENSG00000223812.8
known_NIR_45067	chr7	100075630;100079656	100079536;100081635	-	100075630	100081635	cassetteExon	ENST00000412947.6	known	0.89	8	1	0;16	1	n	0.87	26.5	4	4;49	4	y	0.78	7	2	0;14	2	n	1	18	0	1;35	0	n	1	7.5	0	0;15	0	n	1	5.5	0	5;6	0	n	0.0453884	4.53251	up	ENSG00000166526.18
known_NIR_8442	chr11	62433891	62535003	-	62491831	62535003	3pMXE	ENST00000533365.5	known	0.06	5	76	5	76	y	0.05	4	82	4	82	y	0.02	1	48	1	48	n	0.1	10	90	10	90	y	0.18	16	72	16	72	y	0.12	8	57	8	57	y	0.0454056	3.34894	up	ENSG00000124942.14
known_NIR_37760	chr3	191425604;191568341	191568206;191569600	+	191425604;191559754	191557262;191569600	MXE	ENST00000657540.1	known	0.19	7.5	31.5	0;15	16;47	n	0.2	6	23.5	0;12	11;36	n	0.23	8	27	0;16	14;40	n	0.15	4.5	26.5	0;9	16;37	n	0.07	2.5	32.5	0;5	26;39	n	0.13	5.5	38	2;9	23;53	y	0.0454056	-3.34894	down	ENSG00000223812.8
known_NIR_21322	chr17	15440285	15545785	-	15503232	15545785	3pMXE	ENST00000225576.7	known	0.12	1	7	1	7	n	0	0	8	0	8	n	0	0	12	0	12	n	0.22	4	14	4	14	y	0.4	2	3	2	3	n	0.2	1	4	1	4	n	0.0454245	3.10575	up	ENSG00000175106.17
known_NIR_33182	chr20	17957037;17968453	17968375;17968700	-	17957037	17968700	cassetteExon	ENST00000490175.5	known	0.87	69.5	10	131;8	10	y	0.94	50	3	100;0	3	n	0.9	46.5	5	81;12	5	y	0.76	58	18	116;0	18	n	0.72	66.5	26	130;3	26	y	0.84	89.5	17	166;13	17	y	0.0454298	-3.195	down	ENSG00000089006.17
known_NIR_31115	chr2	219077364	219078074	-	219077364	219078089	A5SS	ENST00000356853.10	known	0.07	5	62	5	62	y	0.14	12	71	12	71	y	0.09	6	63	6	63	y	0.04	2	53	2	53	y	0	0	76	0	76	n	0.03	3	86	3	86	y	0.0454596	-3.18953	down	ENSG00000187736.13
known_NIR_2244	chr1	206493119	206493920	+	206493119;206493378	206493266;206493920	ES	ENST00000581977.7	known	0.09	9	96.5	9	86;107	y	0.08	10	117	10	108;126	y	0.06	5	75.5	5	65;86	y	0.02	3	127	3	116;138	y	0.05	5	100	5	75;125	y	0	0	122	0	108;136	n	0.0455015	-3.13786	down	ENSG00000263528.8
known_NIR_47516	chr7	75996599	76003758	-	75996599;76001002	76000890;76003758	ES	ENST00000360591.7	known	0.18	104	476.5	104	577;376	y	0.21	133	498	133	653;343	y	0.18	86	394	86	533;255	y	0.16	94	481.5	94	631;332	y	0.16	97	502.5	97	669;336	y	0.14	89	547	89	708;386	y	0.0455407	-3.05085	down	ENSG00000127952.17
known_NIR_43120	chr5	91311032	91313078	-	91311032;91312413	91312295;91313078	ES	ENST00000648811.1	known	0.27	2	5.5	2	5;6	y	0	0	5	0	8;2	n	0.21	2	7.5	2	10;5	y	0.52	6	5.5	6	6;5	y	0.5	4	4	4	6;2	y	0.54	7	6	7	3;9	y	0.0455602	4.35498	up	ENSG00000248323.7
known_NIR_16315	chr14	88084155;88085036	88084984;88086828	+	88084155	88086828	cassetteExon	ENST00000658103.1	known	0.09	4.5	44	0;9	44	n	0.06	3.5	51	2;5	51	y	0.06	2.5	38	1;4	38	n	0.1	4.5	41	0;9	41	n	0.15	4.5	26	2;7	26	y	0.12	5	37	3;7	37	y	0.0455799	3.02372	up	ENSG00000258867.6
known_NIR_34332	chr20	50940955	50942031	-	50941209	50942031	A3SS&ES	ENST00000371582.8	known	0	0	99	0	99	n	0	0	83	0	83	n	0.03	3	87	3	87	y	0.09	9	88	9	88	y	0.04	4	90	4	90	y	0.06	8	130	8	130	y	0.0455799	3.02372	up	ENSG00000000419.14
novel_NIR_55908	chr6	37317206	37324262	+	37317206	37331044	A3SS	ENST00000373491.3	novel	0.23	8	27	8	27	y	0.13	6	40	6	40	n	0.21	6	23	6	23	y	0.06	2	33	2	33	n	0.1	3	28	3	28	n	0.06	2	33	2	33	n	0.0456029	-3.5	down	ENSG00000065491.8
novel_NIR_39612	chr2	74456272	74456755	+	74456272	74457422	A3SS	ENST00000409917.5	novel	0.43	9	12	9	12	y	0.52	12	11	12	11	y	0.58	7	5	7	5	y	0.35	6	11	6	11	y	0.33	4	8	4	8	y	0.15	4	22	4	22	y	0.0456068	-3.02636	down	ENSG00000115274.15
novel_NIR_34542	chr19	49489912	49490501	+	49489912	49490475	A3SS	ENST00000621674.4	novel	0.24	5	16	5	16	y	0	0	5	0	5	n	0	0	9	0	9	n	0.35	6	11	6	11	y	0.41	7	10	7	10	y	0.71	5	2	5	2	y	0.0456213	2.99023	up	ENSG00000142541.18
novel_NIR_26760	chr17	28716994	28718122	-	28716058	28718122	A3SS	ENST00000430132.6	novel	0	0	11	0	11	n	0.35	9	17	9	17	n	0.12	3	22	3	22	n	0.52	16	15	16	15	n	0.64	18	10	18	10	n	0.45	13	16	13	16	y	0.0456234	3.25581	up	ENSG00000109113.20
novel_NIR_35955	chr2	10396920	10419740	+	10396920	10408562	A3SS&ES	ENST00000381765.7	novel	0.11	4	34	4	34	n	0	0	33	0	33	n	0.12	4	29	4	29	n	0.19	7	29	7	29	y	0.35	25	46	25	46	y	0.23	10	34	10	34	y	0.0456247	2.92426	up	ENSG00000115756.13
known_NIR_39194	chr3	61167042	61200617	-	61042099	61200617	A3SS	ENST00000492590.6	known	0.26	14	40	14	40	y	0.15	9	50	9	50	y	0.33	11	22	11	22	y	0.06	2	33	2	33	y	0.1	6	55	6	55	y	0	0	35	0	35	n	0.0456251	-3.22721	down	ENSG00000189283.10
known_NIR_11011	chr12	122976970	122978360	+	122976970;122978199	122977981;122978360	ES	ENST00000545056.5	known	0.8	32	8	32	11;5	y	0.78	38	11	38	22;0	n	0.86	33	5.5	33	4;7	y	0.89	31	4	31	8;0	n	0.89	49	6	49	12;0	n	0.97	73	2	73	3;1	n	0.0456668	2.87828	up	ENSG00000111325.16
known_NIR_37837	chr3	195753230	195757147	-	195753230;195754372	195754213;195757147	ES	ENST00000308466.12	known	0	0	1	0	2;0	n	0	0	2	0	3;1	n	-	-	-	-	-	-	0.46	6	7	6	4;10	y	0.67	4	2	4	0;4	n	1	3	0	3	0;0	n	0.0456679	4.51762	up	ENSG00000145113.22
known_NIR_23575	chr17	7013535	7013666	+	7012777	7013666	A5SS	ENST00000552842.1	known	0.71	12	5	12	5	y	0.74	17	6	17	6	y	0.54	13	11	13	11	y	1	7	0	7	0	n	0.88	14	2	14	2	y	0.82	14	3	14	3	y	0.0456822	2.89615	up	ENSG00000219200.12
known_NIR_4264	chr1	46686870	46689587	-	46686870;46688544	46688353;46689587	ES	ENST00000674268.1	known	0.34	24	46	24	48;44	y	0.28	11	28	11	32;24	y	0.34	19	36.5	19	38;35	y	0.41	28	40	28	45;35	y	0.4	20	30.5	20	36;25	y	0.37	18	30.5	18	40;21	y	0.0456862	3.14286	up	ENSG00000159658.15
known_NIR_20794	chr16	87708075	87708350	-	87708072	87708350	A3SS	ENST00000316853.10	known	0.78	239	68	239	68	y	0.74	284	102	284	102	y	0.74	198	70	198	70	y	0.72	227	88	227	88	y	0.67	258	129	258	129	y	0.7	260	114	260	114	y	0.0457033	-2.87352	down	ENSG00000104731.14
known_NIR_1103	chr1	155061489	155062245	+	155061489;155061975	155061904;155062245	ES	ENST00000527418.5	known	0.59	133	92	133	47;137	y	0.62	129	77.5	129	34;121	y	0.57	104	78.5	104	27;130	y	0.55	120	100	120	45;155	y	0.55	122	101	122	43;159	y	0.51	99	97	99	52;142	y	0.0457033	-2.87352	down	ENSG00000143537.14
known_NIR_40260	chr4	23105616	23120320	+	23083788	23120320	A5SS	ENST00000659942.1	known	0.33	2	4	2	4	n	0.42	5	7	5	7	y	0.71	5	2	5	2	n	1	10	0	10	0	n	0.93	13	1	13	1	n	1	11	0	11	0	n	0.0457202	4.18805	up	ENSG00000248837.7
known_NIR_14846	chr14	20693650	20699355	+	20684696	20699355	A5SS	ENST00000397995.2	known	0.08	1	11	1	11	n	0	0	3	0	3	n	0.33	2	4	2	4	n	0.6	3	2	3	2	n	0.56	5	4	5	4	n	0.56	9	7	9	7	y	0.045873	4.35459	up	ENSG00000258818.4
known_NIR_8288	chr11	57762119	57794010	+	57762046	57794010	A5SS	ENST00000415361.6	known	0.13	4	27	4	27	y	0	0	42	0	42	n	0	0	17	0	17	n	0.35	6	11	6	11	y	0.44	7	9	7	9	y	0.18	2	9	2	9	y	0.0459184	3.1932	up	ENSG00000198561.16
known_NIR_14690	chr14	104792722	104794119	-	104792722	104795484	A5SS	ENST00000407796.7	known	0	0	44	0	44	n	0	0	34	0	34	n	0	0	28	0	28	n	0.13	6	40	6	40	y	0.08	5	55	5	55	y	0.18	8	37	8	37	y	0.0459385	4.50333	up	ENSG00000142208.18
known_NIR_23161	chr17	5485216	5485863	-	5485216	5486069	A5SS	ENST00000158771.9	known	0.01	2	155	2	155	y	0.02	4	190	4	190	y	0.02	2	103	2	103	y	0.11	17	141	17	141	y	0.06	9	149	9	149	y	0.12	23	162	23	162	y	0.0459418	4.24264	up	ENSG00000072849.11
novel_NIR_8461	chr10	73252023	73252120	-	73252023	73252259	A5SS	ENST00000471251.5	novel	0.71	5	2	5	2	y	1	11	0	11	0	y	0.83	10	2	10	2	y	0.67	8	4	8	4	y	0.47	8	9	8	9	y	0.44	4	5	4	5	y	0.0459521	-2.88665	down	ENSG00000182180.14
known_NIR_29353	chr19	55159720	55159899	-	55159607	55159899	A3SS	ENST00000587871.1	known	0.6	6	4	6	4	y	0.67	4	2	4	2	n	0.33	1	2	1	2	n	1	2	0	2	0	n	-	-	-	-	-	-	1	11	0	11	0	n	0.045962	4.5021	up	ENSG00000267110.1
novel_NIR_43068	chr22	20148800	20149187	-	20148800;20148924	20148875;20149187	ES	ENST00000439765.4	novel	0.06	2	29	2	34;24	n	0	0	37	0	31;43	n	0.12	3	21	3	17;25	n	0.38	12	19.5	12	19;20	y	0.33	10	20	10	13;27	y	0.17	5	25	5	19;31	y	0.0459837	3.2323	up	ENSG00000234409.7
novel_NIR_46587	chr3	195967990	195968215	-	195967990	195971323	A5SS	ENST00000440850.5	novel	0.19	6	25	6	25	y	0.12	4	30	4	30	n	0.09	4	39	4	39	n	0	0	30	0	30	n	0	0	22	0	22	n	0	0	16	0	16	n	0.0459952	-4.50035	down	ENSG00000185485.14
known_NIR_8239	chr11	57496164	57500779	-	57497845	57500779	3pMXE	ENST00000524995.5	known	0.26	18	52	18	52	y	0.18	12	54	12	54	y	0.31	14	31	14	31	y	0.16	7	37	7	37	y	0.11	12	96	12	96	y	0.06	4	64	4	64	y	0.0460651	-2.94059	down	ENSG00000149150.9
known_NIR_36203	chr22	49904384	49907721	-	49904506	49907721	A3SS	ENST00000330817.11	known	0.08	9	107	9	107	y	0.14	20	128	20	128	y	0.1	13	120	13	120	y	0.01	2	149	2	149	y	0.01	1	169	1	169	n	0.07	11	147	11	147	y	0.0460824	-2.875	down	ENSG00000182858.14
novel_NIR_14096	chr12	129111139	129113101	+	129111139;129111669	129111420;129113101	ES	ENST00000540739.1	novel	0	0	7	0	14;0	n	0	0	1.5	0	3;0	n	0	0	5	0	10;0	n	0.22	2	7	2	14;0	y	0.5	2	2	2	4;0	y	0.37	5	8.5	5	17;0	y	0.0461688	4.49127	up	ENSG00000249196.6
known_NIR_47789	chr7	97117897;97142818	97142673;97181012	+	97117897;97136467	97136388;97181012	MXE	ENST00000360382.4	known	0.34	18.5	36	10;27	35;37	y	0.47	14.5	16.5	9;20	20;13	y	0.46	13.5	16	9;18	17;15	y	0.25	10	29.5	4;16	26;33	y	0.23	9	31	3;15	33;29	y	0.33	17.5	35.5	8;27	29;42	y	0.0462405	-2.96312	down	ENSG00000196636.8
known_NIR_17684	chr15	74202282	74203003	-	74202282	74202713	5pMXE	ENST00000395105.9	known	0.25	1	3	1	3	n	0.22	2	7	2	7	n	0	0	4	0	4	n	0.5	2	2	2	2	n	0.45	5	6	5	6	y	-	-	-	-	-	-	0.0463232	3.85015	up	ENSG00000137868.19
known_NIR_15606	chr14	55661612	55667241	+	55664041	55667241	5pMXE	ENST00000555172.5	known	0.55	27	22	27	22	y	0.52	47	44	47	44	y	0.51	24	23	24	23	y	0.46	47	55	47	55	y	0.44	27	34	27	34	y	0.37	24	41	24	41	y	0.0463264	-3.46591	down	ENSG00000126777.18
known_NIR_33016	chr2	9420100	9423373	-	9420100	9422479	5pMXE	ENST00000360635.7	known	0.45	21	26	21	26	y	0.32	26	56	26	56	y	0.4	17	26	17	26	y	0.5	31	31	31	31	y	0.55	41	34	41	34	y	0.55	27	22	27	22	y	0.0463748	3.46504	up	ENSG00000119185.13
known_NIR_9603	chr11	75562319	75566316	+	75563770	75566316	5pMXE	ENST00000524558.5	known	0.93	219	16	219	16	y	0.97	234	8	234	8	y	0.92	186	17	186	17	y	0.86	223	36	223	36	y	0.9	224	26	224	26	y	0.89	204	25	204	25	y	0.0463885	-2.91548	down	ENSG00000149257.16
known_NIR_52063	chrX	153863549	153864322	-	153863549;153864017	153863883;153864322	ES	ENST00000361981.7	known	0.19	39	165.5	39	185;146	y	0.22	48	174.5	48	192;157	y	0.2	43	169	43	183;155	y	0.37	99	171	99	203;139	y	0.27	79	214.5	79	192;237	y	0.36	77	134	77	142;126	y	0.0463926	3.93959	up	ENSG00000198910.14
novel_NIR_56394	chr6	70415376	70417280	+	70415376	70426439	A3SS	ENST00000418814.7	novel	0.6	3	2	3	2	y	1	3	0	3	0	y	0.5	2	2	2	2	y	0	0	4	0	4	n	0	0	4	0	4	n	0.38	3	5	3	5	y	0.0464377	-2.88923	down	ENSG00000082269.17
known_NIR_48199	chr8	119744393;119745036	119744881;119746705	-	119744393	119746705	cassetteExon	ENST00000378164.7	known	0.19	15.5	64	16;15	64	y	0.26	23.5	68	18;29	68	y	0.19	6	26	6;6	26	y	0.11	10.5	85	13;8	85	y	0.16	11	59	16;6	59	y	0.07	9	122	7;11	122	y	0.0465566	-2.86039	down	ENSG00000064313.12
known_NIR_18820	chr16	2752854	2757472	+	2752854;2756606	2756334;2757472	ES	ENST00000576924.5	known	0.15	2	11.5	2	2;21	y	0.35	8	15	8	1;29	n	0.27	3	8	3	5;11	y	0.13	3	19.5	3	0;39	n	0	0	12.5	0	2;23	n	0	0	7.5	0	6;9	n	0.0465792	-2.94272	down	ENSG00000167978.17
known_NIR_46350	chr7	152801731;152811733	152811697;152814550	+	152801731	152814550	cassetteExon	ENST00000377776.7	known	0.07	6.5	83	7;6	83	y	0.12	10.5	79	11;10	79	y	0	0	80	0;0	80	n	0.23	14.5	48	13;16	48	y	0.16	15.5	82	15;16	82	y	0.18	19	89	12;26	89	y	0.0465979	3.12358	up	ENSG00000133627.18
known_NIR_7339	chr11	18415301	18434740	+	18415301;18429910	18429737;18434740	ES	ENST00000541669.6	known	0.12	3	22	3	10;34	y	0	0	29.5	0	30;29	n	0	0	20.5	0	20;21	n	0.2	8	31.5	8	30;33	y	0.23	8	26.5	8	16;37	y	0.13	4	26.5	4	20;33	y	0.0466025	2.94646	up	ENSG00000166796.12
novel_NIR_7986	chr10	48306821	48325897	+	48306821	48401612	A3SS	ENST00000395611.7	novel	0.56	5	4	5	4	y	0.6	6	4	6	4	y	-	-	-	-	-	-	0.33	1	2	1	2	n	0	0	4	0	4	n	0	0	9	0	9	n	0.0467416	-4.20381	down	ENSG00000107643.16
known_NIR_38585	chr3	48695418;48715527	48715389;48717157	-	48695418;48711459	48708120;48717157	MXE	ENST00000434860.1	known	0.69	13.5	6	10;17	10;2	y	0.75	16.5	5.5	12;21	7;4	y	0.78	9	2.5	4;14	4;1	n	1	15.5	0	11;20	0;0	n	0.97	17.5	0.5	17;18	1;0	n	0.83	15	3	7;23	6;0	n	0.0468831	3.29418	up	ENSG00000068745.15
known_NIR_36701	chr3	12484628	12489784	+	12484880	12489784	A5SS	ENST00000284995.11	known	0.22	2	7	2	7	n	0.5	6	6	6	6	y	0.5	2	2	2	2	n	0.2	1	4	1	4	n	0	0	8	0	8	n	0	0	5	0	5	n	0.0469033	-2.96431	down	ENSG00000154743.19
known_NIR_12194	chr12	53098051	53099267	+	53098051	53100718	A3SS	ENST00000548547.5	known	0.51	46	45	46	45	y	0.51	34	33	34	33	y	0.36	14	25	14	25	y	0.61	60	38	60	38	y	0.66	37	19	37	19	y	0.68	47	22	47	22	y	0.0469992	3.50811	up	ENSG00000167779.9
novel_NIR_1044	chr1	151055993	151059483	-	151055993	151056656	A5SS&ES	ENST00000470278.5	novel	1	1	0	1	0	n	1	1	0	1	0	n	-	-	-	-	-	-	0.67	4	2	4	2	y	0.24	4	13	4	13	y	0.43	3	4	3	4	y	0.0470152	-4.44767	down	ENSG00000197622.13
novel_NIR_35198	chr19	55635115	55644553	+	55641183	55644553	5pMXE	ENST00000585995.1	novel	0	0	1	0	1	n	0	0	5	0	5	n	0	0	7	0	7	n	-	-	-	-	-	-	0.29	2	5	2	5	y	0.25	2	6	2	6	y	0.0470711	13.5	up	ENSG00000171425.10
known_NIR_37784	chr3	193617285;193617837	193617784;193618869	+	193617285	193618869	cassetteExon	ENST00000361828.7	known	0	0	9	0;0	9	n	0.09	1.5	15	2;1	15	n	0.43	1.5	2	3;0	2	n	0.88	7.5	1	10;5	1	n	0.5	1	1	1;1	1	n	0.62	6.5	4	3;10	4	y	0.0471389	2.86154	up	ENSG00000198836.11
known_NIR_14907	chr14	21391063	21391833	-	21391063;21391642	21391463;21391833	ES	ENST00000430710.8	known	0.05	9	181.5	9	178;185	y	0.07	17	234.5	17	244;225	y	0.01	2	131.5	2	117;146	y	0.1	19	164	19	166;162	y	0.14	26	158.5	26	168;149	y	0.09	16	170	16	169;171	y	0.047171	2.85714	up	ENSG00000100888.15
novel_NIR_46812	chr3	27821724	27860087	+	27848764	27860087	A5SS&ES	ENST00000659724.1	novel	0.4	2	3	2	3	y	0.83	5	1	5	1	y	0.5	1	1	1	1	n	0	0	5	0	5	n	0	0	4	0	4	n	0	0	1	0	1	n	0.0471898	-4.43882	down	ENSG00000225548.7
known_NIR_21184	chr16	89948814;89949513	89949417;89955169	+	89948814	89955169	cassetteExon	ENST00000562986.5	known	0.61	9.5	6	17;2	6	y	0.66	23.5	12	47;0	12	n	0.65	7.5	4	15;0	4	n	0.38	11	18	22;0	18	n	0.36	10	18	20;0	18	n	0.53	11.5	10	23;0	10	n	0.0472039	-3.88449	down	ENSG00000140995.17
known_NIR_19628	chr16	55811007	55812903	-	55811010	55812903	A3SS	ENST00000360526.8	known	0.43	49	65	49	65	y	0.45	52	64	52	64	y	0.32	29	63	29	63	y	0.26	28	79	28	79	y	0.29	36	88	36	88	y	0.21	31	115	31	115	y	0.0472114	-3.14286	down	ENSG00000198848.13
known_NIR_36135	chr22	44714671	44726577	+	44714671;44725292	44725244;44726577	ES	ENST00000611394.4	known	0	0	34.5	0	31;38	n	0	0	59.5	0	54;65	n	0	0	46	0	40;52	n	0.07	2	28.5	2	27;30	y	0.06	3	49	3	40;58	y	0.03	2	66	2	60;72	y	0.0472139	4.4376	up	ENSG00000186654.21
known_NIR_6474	chr10	98209899;98211348	98211307;98231512	+	98209899	98231512	cassetteExon	ENST00000370584.7	known	0.02	1	46	2;0	46	n	0	0	23	0;0	23	n	0	0	11	0;0	11	n	0.11	3.5	29	3;4	29	y	0.16	2.5	13	0;5	13	n	0.07	3	38	3;3	38	y	0.0472361	3.96911	up	ENSG00000166024.14
novel_NIR_45912	chr3	157103479	157104290	-	157103479	157122876	A5SS	ENST00000471357.1	novel	0.33	1	2	1	2	n	0	0	2	0	2	n	0.43	3	4	3	4	y	-	-	-	-	-	-	1	2	0	2	0	y	0.75	6	2	6	2	y	0.0472778	3.44824	up	ENSG00000243629.2
known_NIR_3828	chr1	41143112	41159725	-	41143112;41151684	41151614;41159725	ES	ENST00000402904.6	known	0.08	2	22.5	2	41;4	y	0.04	1	22.5	1	40;5	n	0	0	23.5	0	35;12	n	0.21	2	7.5	2	14;1	n	0.29	12	30	12	56;4	y	0.13	4	27	4	50;4	y	0.0473447	3.29204	up	ENSG00000010803.16
known_NIR_42082	chr5	176448470	176453176	+	176448470	176479188	A3SS	ENST00000261942.7	known	0	0	18	0	18	n	0	0	12	0	12	n	0	0	13	0	13	n	0.15	2	11	2	11	y	0.08	2	24	2	24	y	0.08	1	11	1	11	n	0.0473931	4.42857	up	ENSG00000113194.13
known_NIR_20458	chr16	723018	723095	-	723022	723095	A3SS	ENST00000463539.5	known	0.15	4	23	4	23	y	0.14	4	25	4	25	y	0.21	4	15	4	15	y	0.12	4	30	4	30	y	0.07	1	13	1	13	n	0.07	1	13	1	13	n	0.0474065	-2.91043	down	ENSG00000162004.19
known_NIR_46347	chr7	152144881	152145153	-	152144881	152145165	A5SS	ENST00000360104.8	known	0.61	14	9	14	9	y	0.66	19	10	19	10	y	-	-	-	-	-	-	0.52	14	13	14	13	y	0.45	15	18	15	18	y	0.55	12	10	12	10	y	0.0474173	-3.31049	down	ENSG00000055609.21
known_NIR_7961	chr11	46381758	46382057	+	46381328	46382057	A5SS	ENST00000441869.5	known	0.98	1833	37	1833	37	y	0.99	1843	28	1843	28	y	0.99	1407	18	1407	18	y	0.98	1840	36	1840	36	y	0.97	1889	57	1889	57	y	0.97	1956	53	1956	53	y	0.0474207	-2.82843	down	ENSG00000110492.16
known_NIR_10440	chr12	110498859;110499546	110499535;110502049	-	110498859	110502049	cassetteExon	ENST00000447578.6	known	0.98	179.5	3	50;309	3	y	0.99	175	2	54;296	2	y	0.98	128.5	3	43;214	3	y	1	140	0	43;237	0	n	1	125.5	0	27;224	0	n	0.99	167	1	53;281	1	n	0.0474207	2.82843	up	ENSG00000111237.19
known_NIR_12241	chr12	53295639;53295941	53295839;53296454	+	53295639	53296454	cassetteExon	ENST00000547130.6	known	0.98	1205.5	20	2388;23	20	y	0.99	1379.5	12	2722;37	12	y	0.98	997.5	17	1981;14	17	y	1	1248.5	5	2464;33	5	y	1	1312.5	5	2598;27	5	y	0.99	1196	9	2365;27	9	y	0.0474207	2.82843	up	ENSG00000123349.15
known_NIR_16438	chr14	92732815	92748489	-	92741859	92748489	3pMXE	ENST00000557034.1	known	0.99	300	2	300	2	y	1	353	1	353	1	n	1	225	0	225	0	n	0.99	284	3	284	3	y	0.98	327	7	327	7	y	0.98	358	6	358	6	y	0.0474207	-2.82843	down	ENSG00000100600.15
known_NIR_16747	chr15	40392023	40393469	+	40392023	40393193	A3SS	ENST00000416151.6	known	0.99	177	2	177	2	y	0.98	258	6	258	6	y	0.98	165	4	165	4	y	0.99	202	2	202	2	y	1	234	0	234	0	n	1	224	0	224	0	n	0.0474207	2.82843	up	ENSG00000128944.13
known_NIR_17600	chr15	72351234;72353178	72353068;72355559	-	72351234	72355559	cassetteExon	ENST00000683243.1	known	0.99	370	2	730;10	2	y	0.98	379	7	743;15	7	y	0.98	337.5	6	655;20	6	y	1	376.5	0	739;14	0	n	0.99	413	6	812;14	6	y	1	403.5	1	800;7	1	n	0.0474207	2.82843	up	ENSG00000213614.11
known_NIR_26234	chr19	11507562;11507850	11507702;11507991	-	11507562	11507991	cassetteExon	ENST00000588998.5	known	1	268	0	287;249	0	n	1	328	1	330;326	1	n	0.99	283	2	308;258	2	y	0.99	257.5	2	262;253	2	y	0.98	302.5	6	323;282	6	y	0.98	271.5	5	307;236	5	y	0.0474207	-2.82843	down	ENSG00000130159.14
known_NIR_26559	chr19	14566933	14571889	-	14566931	14571889	A3SS	ENST00000593353.5	known	0.99	2120	28	2120	28	y	0.98	2065	32	2065	32	y	0.98	1809	45	1809	45	y	1	2167	0	2167	0	n	1	2097	0	2097	0	n	0.99	2254	32	2254	32	y	0.0474207	2.82843	up	ENSG00000099795.7
known_NIR_29613	chr19	58545097;58545896	58545425;58547376	+	58545097	58547376	cassetteExon	ENST00000341753.10	known	0.98	702	15	387;1017	15	y	0.97	720	21	332;1108	21	y	0.97	627	17	313;941	17	y	0.99	668.5	8	321;1016	8	y	0.99	725	5	354;1096	5	y	0.98	802	13	389;1215	13	y	0.0474207	2.82843	up	ENSG00000130726.12
known_NIR_34326	chr20	50940933	50942031	-	50940955	50942031	A3SS	ENST00000466152.5	known	1	534	0	534	0	n	1	443	0	443	0	n	0.99	288	3	288	3	y	0.98	517	9	517	9	y	0.99	391	4	391	4	y	0.98	468	8	468	8	y	0.0474207	-2.82843	down	ENSG00000000419.14
known_NIR_38226	chr3	39407082	39407621	+	39406834	39407621	A5SS	ENST00000487876.1	known	0.96	251	10	251	10	y	0.95	261	14	261	14	y	0.96	246	11	246	11	y	0.95	333	18	333	18	y	0.94	326	20	326	20	y	0.94	264	16	264	16	y	0.0474207	-2.82843	down	ENSG00000168028.14
known_NIR_1831	chr1	16989770	16990127	-	16989770	16989887	5pMXE	ENST00000502418.1	known	0.01	2	201	2	201	y	0.02	5	222	5	222	y	0.01	2	158	2	158	y	0.03	6	184	6	184	y	0.03	7	242	7	242	y	0.02	4	196	4	196	y	0.0474207	2.82843	up	ENSG00000159363.19
known_NIR_2197	chr1	202966109	202966528	-	202965993	202966528	A3SS	ENST00000367249.9	known	0	0	156	0	156	n	0	0	223	0	223	n	0.01	2	160	2	160	y	0.02	4	186	4	186	y	0.02	4	248	4	248	y	0.01	2	222	2	222	y	0.0474207	2.82843	up	ENSG00000159348.13
known_NIR_2276	chr1	207767195;207767823	207767607;207783292	+	207767195;207770362	207770321;207783292	MXE	ENST00000322918.9	known	0.01	1.5	145.5	3;0	95;196	n	0.01	2	139	2;2	80;198	y	0.02	1.5	69	1;2	54;84	n	0.03	3	116.5	6;0	107;126	n	0.02	3	130	3;3	88;172	y	0.03	3	117	6;0	78;156	n	0.0474207	2.82843	up	ENSG00000117335.20
known_NIR_3600	chr1	36140166	36149092	-	36140166	36149260	A5SS	ENST00000373163.5	known	1	36	0	36	0	n	0.97	57	2	57	2	y	1	42	0	42	0	n	0.97	67	2	67	2	y	0.94	77	5	77	5	y	0.94	64	4	64	4	y	0.0474207	-2.82843	down	ENSG00000054116.12
known_NIR_5614	chr10	27173259	27186379	+	27173259;27181581	27181480;27186379	ES	ENST00000342386.10	known	0.04	2	53.5	2	4;103	y	0	0	47	0	0;94	n	0	0	34.5	0	0;69	n	0.04	2	53.5	2	0;107	n	0.08	4	46.5	4	2;91	y	0.08	6	72	6	2;142	y	0.0474207	2.82843	up	ENSG00000120539.15
known_NIR_7351	chr11	18509665	18526775	-	18509665	18514678	5pMXE	ENST00000543054.5	known	0.01	4	392	4	392	y	0	2	435	2	435	y	0	0	364	0	364	n	0.01	4	425	4	425	y	0.02	9	466	9	466	y	0.02	9	483	9	483	y	0.0474207	2.82843	up	ENSG00000074319.13
known_NIR_8292	chr11	57811486	57815394	+	57811486;57814373	57814311;57815394	ES	ENST00000673781.1	known	0.01	1	190.5	1	219;162	n	0	0	256	0	261;251	n	0	0	174	0	169;179	n	0.01	3	226	3	233;219	y	0.02	4	219.5	4	232;207	y	0.02	5	265	5	265;265	y	0.0474207	2.82843	up	ENSG00000288534.1
known_NIR_8293	chr11	57811486	57815394	+	57814373	57815394	A5SS	ENST00000682974.1	known	0.01	1	162	1	162	n	0	0	251	0	251	n	0	0	179	0	179	n	0.01	3	219	3	219	y	0.02	4	207	4	207	y	0.02	5	265	5	265	y	0.0474207	2.82843	up	ENSG00000198561.16
known_NIR_9993	chr11	903111;903778	903704;904706	-	903111	904706	cassetteExon	ENST00000323578.13	known	0.01	5.5	472	3;8	472	y	0.02	11	604	11;11	604	y	0.02	7.5	463	5;10	463	y	0	2.5	617	5;0	617	n	0.01	4	597	3;5	597	y	0	2.5	626	2;3	626	y	0.0474207	-2.82843	down	ENSG00000177830.18
known_NIR_10279	chr12	10710114;10710788	10710534;10713211	-	10710114	10713211	cassetteExon	ENST00000228251.9	known	0.08	108	1206	5;211	1206	y	0.08	113.5	1308	7;220	1308	y	0.09	93	953	12;174	953	y	0.1	118	1108	12;224	1108	y	0.09	114	1182	11;217	1182	y	0.1	132.5	1234	11;254	1234	y	0.0474207	2.82843	up	ENSG00000060138.13
known_NIR_11588	chr12	31084061	31084969	+	31084061;31084669	31084583;31084969	ES	ENST00000542129.5	known	0	0	85	0	80;90	n	0	0	66.5	0	64;69	n	0.02	1	53	1	45;61	n	0.04	3	64	3	68;60	y	0.04	4	108.5	4	125;92	y	0.02	1	62.5	1	63;62	n	0.0474207	2.82843	up	ENSG00000013573.17
known_NIR_12276	chr12	53295639;53296551	53296454;53297850	+	53295639;53295941	53295839;53297850	MXE	ENST00000243040.10	known	0.06	72	1206.5	20;124	2388;25	y	0.06	83	1384	12;154	2722;46	y	0.05	56.5	1001.5	17;96	1981;22	y	0.05	61.5	1256	5;118	2464;48	y	0.04	51	1318	5;97	2598;38	y	0.04	51.5	1199	9;94	2365;33	y	0.0474207	-2.82843	down	ENSG00000123349.15
known_NIR_12614	chr12	55803728	55822001	-	55803728	55817666	5pMXE	ENST00000546604.5	known	0.02	8	335	8	335	y	0.01	5	342	5	342	y	0.02	5	215	5	215	y	0	0	399	0	399	n	0.01	4	295	4	295	y	0	0	352	0	352	n	0.0474207	-2.82843	down	ENSG00000205323.9
known_NIR_14524	chr14	103386080	103428387	+	103386080;103405267	103405076;103428387	ES	ENST00000678179.1	known	0	0	34	0	32;36	n	0.03	1	28.5	1	18;39	n	0	0	17.5	0	7;28	n	0.03	1	29.5	1	14;45	n	0.06	2	32.5	2	28;37	y	0.06	2	33.5	2	19;48	y	0.0474207	2.82843	up	ENSG00000075413.19
known_NIR_14828	chr14	20455401	20455578	+	20455394	20455578	A5SS	ENST00000555306.5	known	0.01	4	601	4	601	y	0	3	684	3	684	y	0	0	560	0	560	n	0.02	9	585	9	585	y	0.02	12	556	12	556	y	0.01	6	588	6	588	y	0.0474207	2.82843	up	ENSG00000100823.12
known_NIR_16461	chr14	94081449	94094750	+	94081449	94096887	A3SS	ENST00000553350.5	known	0.01	1	180	1	180	n	0.02	4	211	4	211	y	0.02	4	201	4	201	y	0	0	248	0	248	n	0	0	247	0	247	n	0.01	2	257	2	257	y	0.0474207	-2.82843	down	ENSG00000165948.11
known_NIR_17246	chr15	60386086;60393440	60393239;60397943	-	60386086;60397338	60396151;60397943	MXE	ENST00000558169.6	known	0.01	1.5	212.5	1;2	33;392	n	0	1	229.5	2;0	39;420	n	0	0	160.5	0;0	26;295	n	0.01	1	194.5	0;2	18;371	n	0.02	3.5	227.5	0;7	25;430	n	0.02	5	231.5	4;6	26;437	y	0.0474207	2.82843	up	ENSG00000182718.18
known_NIR_17247	chr15	60386086;60393440	60393239;60397943	-	60386086;60397338	60396280;60397943	MXE	ENST00000557906.6	known	0.01	1.5	201.5	1;2	11;392	n	0	1	214.5	2;0	9;420	n	0	0	148.5	0;0	2;295	n	0.01	1	187.5	0;2	4;371	n	0.02	3.5	221	0;7	12;430	n	0.02	5	221	4;6	5;437	y	0.0474207	2.82843	up	ENSG00000182718.18
known_NIR_17294	chr15	60396427	60397943	-	60396427;60397338	60397258;60397943	ES	ENST00000557906.6	known	0.03	6	232	6	72;392	y	0.03	8	246	8	72;420	y	0.02	3	184	3	73;295	y	0.01	2	226.5	2	82;371	y	0.01	4	274	4	118;430	y	0.02	5	270.5	5	104;437	y	0.0474207	-2.82843	down	ENSG00000182718.18
known_NIR_19840	chr16	578505	579069	+	578505	578785	A3SS&ES	ENST00000636005.1	known	0.07	5	70	5	70	y	0.04	2	49	2	49	y	0.04	3	66	3	66	y	0	0	84	0	84	n	0	0	49	0	49	n	0.03	2	65	2	65	y	0.0474207	-2.82843	down	ENSG00000007541.17
known_NIR_21180	chr16	89948814	89955169	+	89948814;89954376	89954289;89955169	ES	ENST00000562578.5	known	0.01	6	541.5	6	6;1077	y	0.02	12	582.5	12	5;1160	y	0.01	4	468.5	4	5;932	y	0.03	18	519	18	6;1032	y	0.03	18	531	18	0;1062	n	0.02	10	565	10	3;1127	y	0.0474207	2.82843	up	ENSG00000140995.17
known_NIR_21596	chr17	18727758	18734877	+	18727758	18731070	3pMXE	ENST00000573443.5	known	0.01	1	172	1	172	n	0.02	4	198	4	198	y	0.02	4	157	4	157	y	0	0	176	0	176	n	0.01	2	214	2	214	y	0	0	189	0	189	n	0.0474207	-2.82843	down	ENSG00000108448.22
known_NIR_21666	chr17	21198840;21208539	21208392;21210936	-	21198840	21210936	cassetteExon	ENST00000584432.5	known	0.01	2	157	2;2	157	y	0.02	3	138	4;2	138	y	0.02	3	131	6;0	131	n	0	0.5	115	1;0	115	n	0.01	1.5	131	3;0	131	n	0	0.5	127	0;1	127	n	0.0474207	-2.82843	down	ENSG00000178307.10
known_NIR_25902	chr18	79973856	79988240	-	79973856	79977598	A5SS&ES	ENST00000585474.5	known	0.04	71	1939	71	1939	y	0.03	55	2080	55	2080	y	0.04	78	1721	78	1721	y	0.02	42	2045	42	2045	y	0.03	63	2081	63	2081	y	0.02	36	1964	36	1964	y	0.0474207	-2.82843	down	ENSG00000141759.15
known_NIR_26231	chr19	11507562	11507991	-	11507562	11507702	A5SS	ENST00000592312.5	known	0	0	287	0	287	n	0	1	330	1	330	n	0.01	2	308	2	308	y	0.01	2	262	2	262	y	0.02	6	323	6	323	y	0.02	5	307	5	307	y	0.0474207	2.82843	up	ENSG00000130159.14
known_NIR_26232	chr19	11507562	11507991	-	11507850	11507991	3pMXE	ENST00000591352.1	known	0	0	249	0	249	n	0	1	326	1	326	n	0.01	2	258	2	258	y	0.01	2	253	2	253	y	0.02	6	282	6	282	y	0.02	5	236	5	236	y	0.0474207	2.82843	up	ENSG00000130159.14
known_NIR_26966	chr19	18590933	18592089	+	18590933	18592108	A3SS	ENST00000598375.5	known	0.01	7	649	7	649	y	0	3	635	3	635	y	0	2	599	2	599	y	0.01	9	694	9	694	y	0.02	12	666	12	666	y	0.02	12	750	12	750	y	0.0474207	2.82843	up	ENSG00000006015.18
known_NIR_27371	chr19	35001244	35009119	+	35000486	35009119	A5SS	ENST00000317991.10	known	0	0	225	0	225	n	0.01	2	228	2	228	y	0	0	187	0	187	n	0.02	5	209	5	209	y	0.01	2	283	2	283	y	0.02	4	170	4	170	y	0.0474207	2.82843	up	ENSG00000089351.15
known_NIR_29277	chr19	54124656	54126500	+	54124656	54126528	A3SS	ENST00000419967.5	known	0.01	3	516	3	516	y	0.02	11	537	11	537	y	0.02	8	467	8	467	y	0	0	527	0	527	n	0.01	5	470	5	470	y	0	2	497	2	497	y	0.0474207	-2.82843	down	ENSG00000105618.14
known_NIR_33240	chr20	20018200	20022456	+	20017449	20022456	A5SS	ENST00000310450.8	known	0.03	21	681	21	681	y	0.02	17	732	17	732	y	0.03	11	421	11	421	y	0.01	6	709	6	709	y	0.01	7	668	7	668	y	0.02	18	734	18	734	y	0.0474207	-2.82843	down	ENSG00000173418.12
known_NIR_34039	chr20	45365686	45399690	+	45365686	45366875	3pMXE	ENST00000372727.5	known	0	0	151	0	151	n	0.01	1	171	1	171	n	0	0	95	0	95	n	0.02	3	119	3	119	y	0.02	3	146	3	146	y	0.01	1	110	1	110	n	0.0474207	2.82843	up	ENSG00000204070.10
known_NIR_35079	chr21	46188821	46191881	-	46191235	46191881	A3SS	ENST00000397728.8	known	0.03	7	219	7	219	y	0.04	9	243	9	243	y	0.04	7	155	7	155	y	0.03	6	222	6	222	y	0.02	4	226	4	226	y	0.02	5	213	5	213	y	0.0474207	-2.82843	down	ENSG00000160285.15
known_NIR_35143	chr22	17600095	17612812	-	17600095;17601181	17601092;17612812	ES	ENST00000253413.10	known	0.02	16	875	16	837;913	y	0.01	8	967	8	922;1012	y	0.02	14	695.5	14	667;724	y	0	2	911.5	2	861;962	y	0.01	8	915.5	8	884;947	y	0	3	947	3	907;987	y	0.0474207	-2.82843	down	ENSG00000131100.13
known_NIR_35144	chr22	17600095	17612812	-	17601181	17612812	3pMXE	ENST00000484653.5	known	0.02	16	913	16	913	y	0.01	8	1012	8	1012	y	0.02	14	724	14	724	y	0	2	962	2	962	y	0.01	8	947	8	947	y	0	3	987	3	987	y	0.0474207	-2.82843	down	ENSG00000131100.13
known_NIR_36866	chr3	129140485;129144189	129144068;129145761	-	129140485	129145761	cassetteExon	ENST00000418265.1	known	0.01	2	201	4;0	201	n	0	0	205	0;0	205	n	0	0	110	0;0	110	n	0.02	3	139	6;0	139	n	0.01	1	189	2;0	189	n	0.02	3	183	3;3	183	y	0.0474207	2.82843	up	ENSG00000261796.1
known_NIR_37707	chr3	186790060	186790142	-	186790064	186790142	A3SS	ENST00000433496.5	known	0	2	483	2	483	y	0.01	7	505	7	505	y	0	0	382	0	382	n	0.01	6	522	6	522	y	0.02	8	417	8	417	y	0.02	10	457	10	457	y	0.0474207	2.82843	up	ENSG00000163918.12
known_NIR_38025	chr3	28241901	28263291	+	28241812	28263291	A5SS	ENST00000477739.1	known	0.01	4	369	4	369	y	0.01	6	412	6	412	y	0.02	7	319	7	319	y	0.02	8	451	8	451	y	0.03	10	383	10	383	y	0.03	13	438	13	438	y	0.0474207	2.82843	up	ENSG00000187118.14
known_NIR_40616	chr4	55364271	55369832	+	55367722	55369832	5pMXE	ENST00000677930.1	known	0.05	31	599	31	599	y	0.04	23	589	23	589	y	0.05	30	517	30	517	y	0.04	24	566	24	566	y	0.03	16	596	16	596	y	0.03	21	635	21	635	y	0.0474207	-2.82843	down	ENSG00000128039.13
known_NIR_41131	chr5	115837764;115840934	115840497;115841390	-	115837764	115841390	cassetteExon	ENST00000509910.2	known	0.05	12	215	11;13	215	y	0.06	11	184	11;11	184	y	0.06	8.5	140	3;14	140	y	0.04	7.5	170	15;0	170	n	0.05	11	195	9;13	195	y	0.04	8.5	195	13;4	195	y	0.0474207	-2.82843	down	ENSG00000145782.13
known_NIR_41159	chr5	122826193	122827575	+	122826193	122827379	A3SS	ENST00000514030.1	known	0.01	1	140	1	140	n	0	0	148	0	148	n	0	0	105	0	105	n	0.02	4	166	4	166	y	0.02	2	86	2	86	y	0.01	2	143	2	143	y	0.0474207	2.82843	up	ENSG00000205302.7
known_NIR_41531	chr5	139021292	139042620	-	139026992	139042620	3pMXE	ENST00000508639.5	known	0.04	37	817	37	817	y	0.03	29	906	29	906	y	0.04	31	757	31	757	y	0.02	16	846	16	846	y	0.02	21	1012	21	1012	y	0.03	32	933	32	933	y	0.0474207	-2.82843	down	ENSG00000120725.13
known_NIR_42041	chr5	173609434	173616200	-	173609434;173613255	173613131;173616200	ES	ENST00000311086.9	known	0.02	4	200	4	246;154	y	0.02	4	216	4	276;156	y	0.01	2	149	2	197;101	y	0	0	177	0	231;123	n	0	0	177	0	216;138	n	0.01	1	184	1	240;128	n	0.0474207	-2.82843	down	ENSG00000145919.11
known_NIR_45993	chr7	140687241	140690760	+	140687241;140689725	140689597;140690760	ES	ENST00000072869.9	known	0.02	2	112.5	2	97;128	y	0.01	2	138.5	2	122;155	y	0.02	2	113.5	2	105;122	y	0	0	91.5	0	67;116	n	0.01	1	111	1	98;124	n	0	0	116.5	0	100;133	n	0.0474207	-2.82843	down	ENSG00000133597.11
known_NIR_47466	chr7	74711109	74716894	+	74711109	74714857	3pMXE	ENST00000490431.2	known	0.94	65	4	65	4	y	0.94	89	6	89	6	y	0.97	57	2	57	2	y	0.97	74	2	74	2	y	1	58	0	58	0	n	1	36	0	36	0	n	0.0474207	2.82843	up	ENSG00000263001.7
known_NIR_49093	chr8	144309896	144311321	+	144309896;144311249	144311174;144311321	ES	ENST00000400780.8	known	0.02	15	734	15	701;767	y	0.03	19	692.5	19	625;760	y	0.03	18	617	18	568;666	y	0.01	9	692	9	636;748	y	0.02	14	811.5	14	781;842	y	0.01	8	704	8	716;692	y	0.0474207	-2.82843	down	ENSG00000185122.11
known_NIR_51175	chr9	34635858	34637220	-	34635858	34636997	A5SS&ES	ENST00000353468.4	known	0.05	58	1219	58	1219	y	0.05	68	1313	68	1313	y	0.04	43	1050	43	1050	y	0.03	44	1311	44	1311	y	0.04	57	1332	57	1332	y	0.03	38	1337	38	1337	y	0.0474207	-2.82843	down	ENSG00000147955.18
known_NIR_1307	chr1	155717128	155725382	+	155721618	155725382	5pMXE	ENST00000479151.5	known	0.05	34	611	34	611	y	0.05	37	675	37	675	y	0.06	31	506	31	506	y	0.06	46	708	46	708	y	0.07	47	634	47	634	y	0.07	52	661	52	661	y	0.0474207	2.82843	up	ENSG00000132676.16
known_NIR_38553	chr3	48694240	48695090	-	48693338	48695090	A3SS	ENST00000449563.5	known	0.98	64	1	64	1	n	1	43	0	43	0	n	1	63	0	63	0	n	0.98	87	2	87	2	y	0.96	80	3	80	3	y	0.96	68	3	68	3	y	0.0474207	-2.82843	down	ENSG00000068745.15
known_NIR_39604	chr4	105438036;105456745	105456681;105473894	-	105438036;105449403	105446383;105473894	MXE	ENST00000351450.10	known	0.34	208	397.5	0;416	795;0	n	0.34	225	440	0;450	878;2	n	0.33	147.5	305	0;295	608;2	n	0.32	215	464.5	3;427	927;2	y	0.33	193	389	0;386	778;0	n	0.32	216.5	470.5	0;433	940;1	n	0.0474207	-2.82843	down	ENSG00000138777.20
known_NIR_49481	chr8	38163840;38169917	38169802;38171965	-	38163840	38171965	cassetteExon	ENST00000520755.5	known	0.82	382.5	85	443;322	85	y	0.84	413	80	463;363	80	y	0.82	269.5	58	267;272	58	y	0.86	345.5	58	348;343	58	y	0.86	370	61	427;313	61	y	0.84	408	77	423;393	77	y	0.0474207	2.82843	up	ENSG00000175324.10
known_NIR_52201	chrX	154419623	154420032	+	154419623;154419746	154419705;154420032	ES	ENST00000612460.5	known	0.42	114	155	114	130;180	y	0.42	144	198.5	144	178;219	y	0.43	114	149	114	124;174	y	0.44	123	159	123	135;183	y	0.43	153	200	153	170;230	y	0.44	149	187.5	149	162;213	y	0.0474207	2.82843	up	ENSG00000102125.16
known_NIR_20568	chr16	787645	788256	-	787744	788256	A3SS	ENST00000007264.7	known	0.05	7	133	7	133	y	0.06	13	198	13	198	y	0.06	7	113	7	113	y	0.11	18	149	18	149	y	0.11	18	146	18	146	y	0.16	29	157	29	157	y	0.0474796	4.11844	up	ENSG00000007376.8
known_NIR_49433	chr8	30544624	30545164	+	30544624	30558887	A3SS	ENST00000320203.8	known	0.22	11	38	11	38	y	0.16	6	31	6	31	y	0.21	6	23	6	23	y	0.6	28	19	28	19	y	0.41	11	16	11	16	y	0.39	16	25	16	25	y	0.047674	3.88812	up	ENSG00000157110.16
known_NIR_29866	chr19	9621645;9627806	9627716;9632228	+	9621645	9632228	cassetteExon	ENST00000585797.5	known	0.56	2.5	2	0;5	2	n	0.56	5	4	0;10	4	n	0.25	3	9	0;6	9	n	0.05	0.5	9	0;1	9	n	0	0	10	0;0	10	n	0.2	4	16	2;6	16	y	0.0476939	-3.12318	down	ENSG00000267106.8
known_NIR_43167	chr5	93438741;93544915	93544795;93553761	-	93438741	93553761	cassetteExon	ENST00000665798.1	known	0.6	6	4	3;9	4	y	0.36	4	7	6;2	7	y	0.43	6	8	2;10	8	y	0.13	2	13	1;3	13	n	0.29	2	5	0;4	5	n	0.2	1.5	6	0;3	6	n	0.0476939	-3.02019	down	ENSG00000237187.9
known_NIR_8328	chr11	60939638	60942035	-	60939638	60941122	A5SS	ENST00000681015.1	known	0.44	79	100	79	100	y	0.46	72	83	72	83	y	0.38	39	64	39	64	y	0.49	111	116	111	116	y	0.54	107	92	107	92	y	0.51	76	72	76	72	y	0.0476942	3.08563	up	ENSG00000110446.12
known_NIR_47473	chr7	74884524;74885146	74885023;74887683	-	74884524	74887683	cassetteExon	ENST00000651031.1	known	0.28	8	21	6;10	21	y	0.27	8.5	23	6;11	23	y	0.38	5	8	7;3	8	y	0.23	6	20	4;8	20	y	0.17	5.5	27	3;8	27	y	0.15	4	23	8;0	23	n	0.0477571	-2.97639	down	ENSG00000277072.5
novel_NIR_52077	chr5	163457610	163459730	-	163457610	163458995	5pMXE	ENST00000519395.5	novel	0	0	6	0	6	n	0	0	7	0	7	n	0	0	2	0	2	n	0.4	4	6	4	6	y	0.33	2	4	2	4	y	0.17	2	10	2	10	y	0.0478189	4.40732	up	ENSG00000170584.11
novel_NIR_27264	chr17	38853105	38853378	-	38853105	38853488	A5SS	ENST00000378096.3	novel	0.57	4	3	4	3	y	-	-	-	-	-	-	0.5	2	2	2	2	y	1	6	0	6	0	y	1	3	0	3	0	y	-	-	-	-	-	-	0.0478274	13.2857	up	ENSG00000125691.14
known_NIR_31048	chr2	218652300	218656150	-	218650526	218656150	A3SS	ENST00000449707.5	known	0	0	2	0	2	n	0.14	2	12	2	12	y	-	-	-	-	-	-	1	1	0	1	0	n	1	6	0	6	0	n	1	4	0	4	0	n	0.0478274	13.2857	up	ENSG00000115568.16
known_NIR_48454	chr8	127854795	127855155	+	127796071	127855155	A5SS	ENST00000660438.1	known	0	0	9	0	9	n	0	0	7	0	7	n	0	0	2	0	2	n	0.5	6	6	6	6	y	-	-	-	-	-	-	0.43	3	4	3	4	n	0.0478274	13.2857	up	ENSG00000249859.12
novel_NIR_1756	chr1	156596478	156598023	-	156596478	156598227	A5SS	ENST00000415314.6	novel	-	-	-	-	-	-	0.86	6	1	6	1	y	1	4	0	4	0	y	0	0	5	0	5	n	0	0	2	0	2	n	0	0	4	0	4	n	0.0478274	-13.2857	down	ENSG00000160818.17
novel_NIR_13556	chr12	120200435	120200730	-	120199425	120200730	A3SS	ENST00000547211.5	novel	-	-	-	-	-	-	0.14	1	6	1	6	n	0	0	2	0	2	n	1	6	0	6	0	y	1	4	0	4	0	y	-	-	-	-	-	-	0.0478274	13.2857	up	ENSG00000089157.16
novel_NIR_45107	chr3	126917922	126953025	+	126935186	126953025	5pMXE	ENST00000504973.5	novel	0	0	3	0	3	n	0	0	5	0	5	n	0	0	8	0	8	n	-	-	-	-	-	-	0.86	6	1	6	1	y	1	6	0	6	0	y	0.0478274	13.2857	up	ENSG00000159685.11
novel_NIR_67532	chrX	1418116	1421658	-	1418116;1419114	1418982;1421658	ES	ENST00000381317.9	novel	-	-	-	-	-	-	0.86	3	0.5	3	0;1	y	1	2	0	2	0;0	y	-	-	-	-	-	-	0	0	0.5	0	0;1	n	0	0	1	0	1;1	n	0.0478274	-13.2857	down	ENSG00000169093.16
known_NIR_51158	chr9	34179240;34220948	34220908;34241185	+	34179240;34234340	34234216;34241185	MXE	ENST00000625521.2	known	0.46	33	39	58;8	6;72	y	0.52	42	39.5	80;4	6;73	y	0.57	26.5	20	49;4	2;38	y	0.42	25.5	34.5	49;2	1;68	n	0.42	38	53.5	76;0	1;106	n	0.32	24.5	53	49;0	3;103	n	0.0478561	-2.82194	down	ENSG00000165006.14
novel_NIR_6813	chr10	103450099	103452156	-	103450800	103452156	A3SS	ENST00000480642.1	novel	0	0	5	0	5	n	0	0	4	0	4	n	0.27	3	8	3	8	y	0.8	4	1	4	1	y	0.33	3	6	3	6	y	0.75	6	2	6	2	y	0.0478565	3.0825	up	ENSG00000138172.11
novel_NIR_11357	chr11	64224133	64224285	-	64223967	64224285	A3SS	ENST00000541278.5	novel	0.46	18	21	18	21	y	0.64	25	14	25	14	y	0.62	13	8	13	8	y	0.24	6	19	6	19	y	0.4	14	21	14	21	y	0.41	9	13	9	13	y	0.0479531	-2.81871	down	ENSG00000149743.14
known_NIR_23645	chr17	72404816;72421066	72420700;72428236	-	72404816	72428236	cassetteExon	ENST00000650483.1	known	0.08	6	66	12;0	66	n	0.15	7.5	42	11;4	42	y	0.13	3.5	24	7;0	24	n	0.32	9.5	20	13;6	20	y	0.23	10.5	35	18;3	35	y	0.2	12.5	50	25;0	50	n	0.0480017	3.1225	up	ENSG00000227036.8
known_NIR_48220	chr8	123140901	123144717	+	123140901	123142262	3pMXE	ENST00000518866.2	known	0.08	4	46	4	46	y	0.09	4	43	4	43	y	0.14	4	25	4	25	y	0.03	2	68	2	68	y	0.04	2	49	2	49	y	0.02	1	47	1	47	n	0.0480563	-3.77297	down	ENSG00000156787.17
known_NIR_1184	chr1	155218049	155218456	-	155218049	155218388	A5SS	ENST00000486869.5	known	0	0	9	0	9	n	0	0	3	0	3	n	0.2	4	16	4	16	y	0.42	5	7	5	7	y	0.2	3	12	3	12	y	0.42	5	7	5	7	y	0.0480714	2.82523	up	ENSG00000160766.14
known_NIR_35293	chr22	20052584;20061706	20061530;20063338	+	20052584;20056013	20055943;20063338	MXE	ENST00000444651.5	known	0.25	7.5	22.5	6;9	43;2	y	0.15	3.5	19.5	4;3	36;3	y	0.22	5	18	5;5	35;1	n	0.11	4	33	2;6	61;5	y	0.11	3.5	27	4;3	51;3	y	0.07	2	26	2;2	47;5	y	0.0481347	-3.38573	down	ENSG00000183597.16
novel_NIR_7404	chr10	133381659	133383970	+	133381659	133388956	A3SS	ENST00000356306.9	novel	0.25	1	3	1	3	n	0	0	2	0	2	n	-	-	-	-	-	-	0.85	11	2	11	2	y	1	4	0	4	0	y	-	-	-	-	-	-	0.0481499	5.48795	up	ENSG00000148832.16
novel_NIR_60560	chr7	7182820;7215239	7215042;7234303	+	7182820	7234303	cassetteExon	ENST00000436587.7	novel	0.39	7	11	0;14	11	n	0.22	2	7	3;1	7	n	0.22	2	7	2;2	7	y	0.11	2	17	4;0	17	n	0.11	1	8	2;0	8	n	0	0	18	0;0	18	n	0.0481703	-3.01258	down	ENSG00000106392.11
known_NIR_23871	chr17	75218306;75225237	75225124;75225342	+	75218306	75225342	cassetteExon	ENST00000579298.5	known	0.9	115	13	2;228	13	y	0.96	153	6	0;306	6	n	0.97	106.5	3	0;213	3	n	0.89	110	13	0;220	13	n	0.8	127	31	0;254	31	n	0.85	132	23	8;256	23	y	0.0483315	-2.84368	down	ENSG00000125450.11
novel_NIR_57924	chr7	128863062;128863404	128863355;128865377	+	128863062;128865203	128865120;128865377	MXE	ENST00000492758.1	novel	0.45	13.5	16.5	14;13	11;22	y	0.48	20.5	22	26;15	15;29	y	0.37	13.5	23	15;12	22;24	y	0.08	3.5	40	6;1	33;47	n	0.18	9.5	44	4;15	40;48	y	0.31	16	35.5	13;19	38;33	y	0.0483889	-3.2778	down	ENSG00000128524.5
known_NIR_12499	chr12	54283967;54284601	54284240;54286662	+	54283967	54286662	cassetteExon	ENST00000677840.1	known	0.47	4.5	5	9;0	5	n	0.57	6.5	5	5;8	5	y	0.75	3	1	6;0	1	n	0.38	2.5	4	5;0	4	n	0.2	2	8	4;0	8	n	0.33	3.5	7	7;0	7	n	0.0484661	-2.99555	down	ENSG00000135486.19
known_NIR_52974	chrX	75112972	75156105	-	75112972;75114834	75114754;75156105	ES	ENST00000253577.9	known	0.17	4	20	4	29;11	y	0.23	4	13.5	4	26;1	n	0.15	2	11.5	2	14;9	y	0	0	35	0	54;16	n	0.12	2	14	2	22;6	y	0	0	19	0	24;14	n	0.0484935	-3.07143	down	ENSG00000131269.19
novel_NIR_30871	chr18	36164667	36167156	+	36164667	36167153	A3SS	ENST00000539560.5	novel	0	0	2	0	2	n	0	0	10	0	10	n	0.06	1	17	1	17	n	0.17	1	5	1	5	n	0.33	2	4	2	4	y	0.17	1	5	1	5	n	0.0485774	3.56975	up	ENSG00000134759.14
known_NIR_12441	chr12	54187905;54188596	54188515;54188951	-	54187905	54188951	cassetteExon	ENST00000635546.1	known	0.05	1.5	26	2;1	26	n	0.07	2	28	3;1	28	n	0.12	3	23	2;4	23	y	0.18	4.5	21	6;3	21	y	0.36	9.5	17	15;4	17	y	0.31	12.5	28	6;19	28	y	0.0485784	3.53364	up	ENSG00000123415.16
known_NIR_7337	chr11	18412843;18415301	18415184;18434740	+	18412843	18434740	cassetteExon	ENST00000539369.1	known	1	5	0	7;3	0	n	0.93	12.5	1	25;0	1	n	1	8	0	16;0	0	n	0.84	21.5	4	35;8	4	y	0.74	14.5	5	21;8	5	y	0.62	13	8	22;4	8	y	0.0485888	-3.5921	down	ENSG00000166796.12
known_NIR_17226	chr15	60386086;60393440	60393013;60397943	-	60386086;60396427	60396151;60397943	MXE	ENST00000560468.6	known	0.07	1.5	19.5	1;2	33;6	n	0.11	3	23.5	6;0	39;8	n	0.15	2.5	14.5	5;0	26;3	n	0.6	15	10	28;2	18;2	y	0.31	6.5	14.5	6;7	25;4	y	0.43	11.5	15.5	17;6	26;5	y	0.0486371	3.85901	up	ENSG00000182718.18
known_NIR_4533	chr1	63454968	63478764	-	63454968	63508528	A5SS	ENST00000462285.5	known	0.94	166	10	166	10	y	0.95	199	11	199	11	y	0.91	103	10	103	10	y	0.96	145	6	145	6	y	0.98	159	3	159	3	y	0.99	204	3	204	3	y	0.0486458	2.90689	up	ENSG00000142856.17
known_NIR_9984	chr11	8911671;8912533	8912453;8914826	+	8911671	8914826	cassetteExon	ENST00000299576.9	known	0.65	258.5	141	274;243	141	y	0.66	255	132	267;243	132	y	0.69	197	90	193;201	90	y	0.62	241	148	275;207	148	y	0.61	241	156	267;215	156	y	0.64	255.5	144	258;253	144	y	0.0486458	-2.90689	down	ENSG00000166452.12
known_NIR_25528	chr18	35468742	35497719	-	35480563	35497719	A3SS&ES	ENST00000592173.5	known	0.07	14	176	14	176	y	0.06	13	209	13	209	y	0.1	18	157	18	157	y	0.05	11	205	11	205	y	0.02	5	202	5	202	y	0.03	8	237	8	237	y	0.0486458	-2.90689	down	ENSG00000153391.16
known_NIR_34842	chr21	34799462	34859474	-	34834601	34859474	3pMXE	ENST00000399237.6	known	0.16	7	38	7	38	y	0.12	9	69	9	69	y	0.17	11	52	11	52	y	0.04	2	47	2	47	y	0.03	1	33	1	33	n	0.11	8	63	8	63	y	0.0486944	-3.05715	down	ENSG00000159216.19
novel_NIR_56686	chr6	87594407	87594542	+	87594407	87594527	A3SS	ENST00000468486.2	novel	0.32	9	19	9	19	y	0.33	11	22	11	22	y	0.25	4	12	4	12	y	0.37	13	22	13	22	y	0.38	10	16	10	16	y	0.42	10	14	10	14	y	0.0486944	3.05715	up	ENSG00000135336.16
known_NIR_16403	chr14	91167378	91167469	+	91167378	91170003	A3SS	ENST00000521334.5	known	0.3	6	14	6	14	y	0.39	16	25	16	25	y	0.48	16	17	16	17	y	0.7	28	12	28	12	y	0.53	18	16	18	16	y	0.56	23	18	23	18	y	0.0487718	2.80087	up	ENSG00000133943.21
known_NIR_36305	chr22	50529731	50529904	-	50529754	50529904	A3SS	ENST00000395680.6	known	0.93	153	12	153	12	y	0.94	203	12	203	12	y	0.98	140	3	140	3	y	0.88	174	23	174	23	y	0.9	207	22	207	22	y	0.9	211	24	211	24	y	0.0487847	-3.4	down	ENSG00000025708.14
known_NIR_18821	chr16	2752854	2757472	+	2756606	2757472	A5SS&ES	ENST00000301740.13	known	0.09	2	21	2	21	y	0.22	8	29	8	29	y	0.21	3	11	3	11	y	0.07	3	39	3	39	y	0	0	23	0	23	n	0	0	9	0	9	n	0.0487923	-3.1353	down	ENSG00000167978.17
known_NIR_51996	chrX	152753391;152753623	152753542;152753788	-	152753391	152753788	cassetteExon	ENST00000684311.1	known	0.6	1.5	1	1;2	1	n	0.33	3	6	2;4	6	y	0.78	3.5	1	6;1	1	n	-	-	-	-	-	-	0	0	2	0;0	2	n	0	0	2	0;0	2	n	0.0488103	-4.3589	down	ENSG00000268606.6
known_NIR_9549	chr11	74636275	74668777	+	74636275	74640564	3pMXE	ENST00000263681.7	known	0.26	8	23	8	23	y	0.27	10	27	10	27	y	0.43	9	12	9	12	y	0.07	2	27	2	27	y	0.21	8	31	8	31	y	0.06	1	15	1	15	n	0.048822	-2.81818	down	ENSG00000077514.9
novel_NIR_8129	chr10	5890346	5893977	+	5890346	5891019	A3SS&ES	ENST00000462507.1	novel	1	1	0	1	0	n	1	17	0	17	0	y	1	2	0	2	0	y	0.73	11	4	11	4	y	0.36	4	7	4	7	y	0.5	4	4	4	4	y	0.0488376	-4.35758	down	ENSG00000134452.20
[truncated: 37 more rows]
[truncated: 4 more columns]
