# Supplementary material for: SK4 potentially modulates the alternative splicing profile associated with papillary thyroid cancer development in BHT101 cells
Source: PeerJ journal article supplement (doi:10.7717/peerj.19391), 2025-05-28
Supplement: TableS7.xlsx [file TableS7.xlsx]

## Sheet: Ras_GO_enrichment_P
Table S7 The mapped GO BP pathways for RASGs by SK4-OE.
Term	Database	ID	Input number	Background number	P-Value	Corrected P-Value	Input	Hyperlink
cellular response to DNA damage stimulus	Gene Ontology	GO:0006974	58	514	1.40314e-08	5.809e-06	HSF1|ZDHHC16|CTC1|CENPS-CORT|MSH5|UBE2D3|AKT1|HDAC10|RPS3|IKBKG|IKBKE|FMR1|POLM|MMS19|SPIDR|TANK|DDX11|MASTL|MGME1|TDP1|APEX1|RAD51AP1|ZSWIM7|FANCC|MICA|PRIMPOL|POLD4|OGG1|CHEK2|FANCI|SMUG1|SIRT7|CEP63|MDC1|POLD3|FBH1|PARP3|FAN1|USP16|TEX264|CHCHD6|INO80C|INO80B|NHEJ1|MCM9|IRF3|SMARCAL1|IRF7|NABP2|RBBP5|PIF1|HROB|MCM7|ASCC2|ASCC1|UBR5|UBE2T|PHF1	http://amigo.geneontology.org/amigo/term/GO:0006974
viral process	Gene Ontology	GO:0016032	63	596	3.98359e-08	8.24603e-06	EFNB2|HSF1|PI4KB|TMEM134|SUMO1|TSG101|BCAP31|NUP85|CTNNB1|KRT7|ELOC|GTF2A2|IKBKE|FMR1|ITGB5|STAT3|KRT8|MICA|GPS2|NLRP1|STAT1|DDX11|ITSN1|HNRNPA1|VPS29|BRD2|DERL2|PCBP2|HNRNPA2B1|IRAK1|RANBP1|KARS1|SLC20A2|ANXA2|TRIM28|SHC1|VRK2|CD46|SIVA1|IK|EIF4H|CTBP1|NUP62|COPS7B|UBR5|IRF3|RCC1|EXOC1|IRF7|RPSA|PPP1CA|TRIM5|EIF4G1|NUP54|ATG12|ITGAV|YIPF4|TANK|KLC1|SP100|EIF4A1|SCARB1|IKBKG	http://amigo.geneontology.org/amigo/term/GO:0016032
DNA repair	Gene Ontology	GO:0006281	46	397	2.08871e-07	2.40637e-05	HSF1|RFC5|RFC4|TEX264|POLG2|CENPS-CORT|MSH5|UBE2D3|RPS3|SIRT7|POLM|SUMO1|MMS19|SPIDR|DDX11|PIF1|FBH1|APEX1|RAD51AP1|ZSWIM7|POLD4|OGG1|PRIMPOL|FANCC|CHEK2|FANCI|TRIM28|UBR5|MDC1|POLD3|PARP3|FAN1|ASCC2|INO80B|INO80C|TDP1|SMUG1|SMARCAL1|NABP2|MGME1|HROB|MCM9|HDAC10|ASCC1|UBE2T|NHEJ1	http://amigo.geneontology.org/amigo/term/GO:0006281
translation	Gene Ontology	GO:0006412	39	311	2.32499e-07	2.40637e-05	MRPL21|MRPL20|RPL23A|EIF1|EIF2B4|RPL5|AIMP2|EIF5|CARS2|AKT1|CARS1|RPS3|TRNAU1AP|RPL22L1|EIF3I|RPS18|MRPL55|AARSD1|RPL23|RPS6KB2|EIF1AD|RPL13A|RPS19|DHPS|MRPL18|MRPL19|YARS1|TNIP1|EIF4H|RMND1|RPSA|MRPS16|RPLP0|EIF4A1|EEF1D|MRPL35|KARS1|HARS1|EIF4G1	http://amigo.geneontology.org/amigo/term/GO:0006412
protein import into peroxisome matrix	Gene Ontology	GO:0016558	6	11	6.65131e-06	0.000550728	PEX2|PEX5|PEX26|PEX6|PEX10|PEX16	http://amigo.geneontology.org/amigo/term/GO:0016558
protein transport	Gene Ontology	GO:0015031	57	667	0.000110318	0.00746026	NUTF2|TIMM23B-AGAP6|TOMM40|SNX7|MCM3AP|KTN1|SNX2|TSG101|BCAP31|FUZ|NUP85|WASHC3|SLC15A3|CHMP3|PEX13|SEC31A|KLHL20|RAB37|UBAP1|RAB34|NUP62|SNX5|ITSN1|VPS29|SYS1|GCC2|MTX1|RABEP1|TIMM50|DNAJC19|BCAP29|PEX26|RUFY1|CHP1|RABGEF1|AKTIP|USO1|EXOC2|LMAN2|MACIR|MVB12A|CTNS|SEC22C|SIL1|NASP|EXOC1|PEX5|EXOC7|NUP54|ATG7|SFT2D1|SNAP23|STX11|VPS52|IPO4|SNX27|SNX25	http://amigo.geneontology.org/amigo/term/GO:0015031
mRNA splicing, via spliceosome	Gene Ontology	GO:0000398	28	255	0.00012614	0.00746026	RBM6|CSTF1|SF3B3|WDR83|TXNL4A|CWF19L1|ESS2|SRSF3|PRPF31|PRPF40A|PCBP2|HNRNPA2B1|HNRNPD|SMNDC1|HNRNPA1|USP39|IK|SNRPN|HTATSF1|POLR2H|RBM41|RALY|PRCC|SRRM2|MAGOHB|U2AF1L4|DDX5|BUD31	http://amigo.geneontology.org/amigo/term/GO:0000398
telomere maintenance	Gene Ontology	GO:0000723	10	49	0.000159561	0.00825729	TERF2|ACD|CTC1|PARP3|APEX1|PIF1|POLD3|FBXO4|POLD4|SP100	http://amigo.geneontology.org/amigo/term/GO:0000723
RNA splicing	Gene Ontology	GO:0008380	31	301	0.000182678	0.0084032	CIR1|ZRANB2|AAR2|SF3B3|WDR83|FMR1|TXNL4A|ESS2|SRSF3|PRPF31|PRPF40A|HNRNPA2B1|PPP1R9B|RBM39|PPIG|NSRP1|SMNDC1|HNRNPA1|LSM1|USP39|U2AF1L4|SNRPN|THOC2|NOL3|RALY|SRRM2|MAGOHB|IK|DDX5|RBM23|BUD31	http://amigo.geneontology.org/amigo/term/GO:0008380
negative regulation of transcription by RNA polymerase II	Gene Ontology	GO:0000122	69	880	0.000287284	0.0115386	TSG101|KDM1A|HDAC3|CIR1|HDAC5|HSF4|SUMO1|LIN37|ZNF219|PHF19|SUDS3|CTNNB1|CNBP|ZNF8|AEBP2|MAGEA2|MXD4|EHMT1|GPS2|PKIG|STAT3|ZNF3|STAT1|DDX5|ZNF749|CHD8|SOX13|MEIS2|RPL23|COPS2|IFI16|ZNF431|HNRNPA2B1|AURKB|CTBP1|CNOT2|CNOT1|HDGF|S100A1|SIRT7|SIRT6|MED25|MECP2|GTF2IRD1|UBE2D3|ENO1|NR2C1|TCF25|SHH|PAWR|GATA2|IRF3|PEX2|IRF7|TRIM28|HSF1|ETV6|PHB|MAZ|TCF7L2|ZGPAT|RUNX1|CREM|ZNF778|UBC|HDAC10|NSD2|YBX3|S…	http://amigo.geneontology.org/amigo/term/GO:0000122
positive regulation of type I interferon-mediated signaling pathway	Gene Ontology	GO:0060340	5	13	0.000320846	0.0115386	IRF3|NLRC5|LSM14A|IRF7|IKBKE	http://amigo.geneontology.org/amigo/term/GO:0060340
inner mitochondrial membrane organization	Gene Ontology	GO:0007007	6	20	0.000374492	0.0115386	TMEM11|CHCHD6|TAZ|MICOS10|MTX1|OPA1	http://amigo.geneontology.org/amigo/term/GO:0007007
membrane fusion	Gene Ontology	GO:0061025	9	45	0.000396302	0.0115386	RABEP1|SNAP23|STX3|OPA1|CHP1|STX11|USO1|DNM2|DNM1	http://amigo.geneontology.org/amigo/term/GO:0061025
translational initiation	Gene Ontology	GO:0006413	18	145	0.000458064	0.0115386	EIF3I|EIF4G1|RPLP0|RPSA|RPL23A|EIF1|RPS19|RPL5|RPS18|EIF5|RPL23|EIF1AD|RPL13A|RPS3|EIF4H|EIF4A1|EIF2B4|AGO3	http://amigo.geneontology.org/amigo/term/GO:0006413
chromatin organization	Gene Ontology	GO:0006325	33	346	0.000470822	0.0115386	SMARCC2|KDM1A|HDAC3|HDAC5|HMGN1|PHF19|PRKAA1|SUDS3|EP400|AEBP2|TRIM28|BCORL1|EHMT1|KANSL2|CHD4|ASXL1|CHD8|BUD23|KMT2C|WDR5|SIRT7|PRMT7|USP16|BRD9|SMYD3|ING4|BRD2|NPM2|NSD2|RBBP5|HDAC10|KDM5C|PHF1	http://amigo.geneontology.org/amigo/term/GO:0006325
antiviral innate immune response	Gene Ontology	GO:0140374	5	14	0.000478073	0.0115386	OAS1|PHB2|NLRP1|AKAP1|PHB	http://amigo.geneontology.org/amigo/term/GO:0140374
negative regulation of telomere maintenance via telomerase	Gene Ontology	GO:0032211	6	21	0.000501676	0.0115386	ACD|CTC1|HNRNPA1|TERF2|PINX1|PIF1	http://amigo.geneontology.org/amigo/term/GO:0032211
protein localization to centrosome	Gene Ontology	GO:0071539	6	21	0.000501676	0.0115386	C2CD3|CEP131|SPAG5|CEP192|CSNK1D|DCTN2	http://amigo.geneontology.org/amigo/term/GO:0071539
mitochondrial translational elongation	Gene Ontology	GO:0070125	13	88	0.000529753	0.011543	MRPL35|MRPL21|MRPL20|MRPS28|MRPL55|MRPL18|MRPL19|MRPS16|DAP3|MRPL40|MRPL53|MRPL48|ERAL1	http://amigo.geneontology.org/amigo/term/GO:0070125
mitochondrial translational termination	Gene Ontology	GO:0070126	13	89	0.000591791	0.0118498	MRPL35|MRPL21|MRPL20|MRPS28|MRPS16|MRPL18|MRPL19|MRPL55|DAP3|MRPL40|MRPL53|MRPL48|ERAL1	http://amigo.geneontology.org/amigo/term/GO:0070126
endocytosis	Gene Ontology	GO:0006897	25	240	0.000627608	0.0118498	SNX2|CTTN|LMBR1L|SNX5|HRAS|ZFYVE9|DNM1|DNM2|OCIAD1|INPPL1|PGBD1|ITSN1|OPHN1|RABEP1|RUFY1|RHOQ|RABGEF1|EPN1|USP33|RAB34|TRIP10|MARCHF2|CYTH2|LRP8|SHH	http://amigo.geneontology.org/amigo/term/GO:0006897
protein import into peroxisome membrane	Gene Ontology	GO:0045046	6	22	0.000660085	0.0118498	PEX2|PEX5|PEX26|PEX13|PXMP4|PEX16	http://amigo.geneontology.org/amigo/term/GO:0045046
TRIF-dependent toll-like receptor signaling pathway	Gene Ontology	GO:0035666	7	30	0.000660256	0.0118498	IRF3|TANK|UBC|UBE2D3|IKBKG|IKBKE|IRF7	http://amigo.geneontology.org/amigo/term/GO:0035666
protein deacetylation	Gene Ontology	GO:0006476	5	15	0.000686947	0.0118498	HDAC10|HDAC3|HDAC5|SIRT6|SIRT7	http://amigo.geneontology.org/amigo/term/GO:0006476
regulation of G2/M transition of mitotic cell cycle	Gene Ontology	GO:0010389	12	81	0.000835527	0.0137667	CDKN2A|HAUS8|SSNA1|CEP63|CTC1|CEP131|TUBB|CEP192|RNASEH2B|CSNK1D|PRKACA|DCTN2	http://amigo.geneontology.org/amigo/term/GO:0010389
cell cycle	Gene Ontology	GO:0007049	53	661	0.000864577	0.0137667	TSG101|TRIM39|TBRG1|BIRC5|CENPS-CORT|EPB41|ITGB3BP|RPS3|MAPK12|CHMP3|TXNL4A|PRC1|NEK11|MDC1|MLF1|HAUS8|ANAPC15|PAK4|MASTL|PRR5|PRPF40A|AURKB|CHEK2|DMTF1|FANCI|ZNF207|CDKN2A|VRK1|CEP63|SPAG5|NASP|CGRRF1|MCM7|USP39|USP16|ING4|CHFR|CENPT|ANAPC5|ANAPC7|DIS3L2|KNSTRN|RCC1|PSRC1|PPP1CA|PRCC|LZTS2|CEP131|TERF2|BOD1|KLHDC8B|CDK6|CDC45	http://amigo.geneontology.org/amigo/term/GO:0007049
mRNA transport	Gene Ontology	GO:0051028	14	106	0.00103371	0.0158503	NUTF2|HSF1|NUP62|MCM3AP|SRSF3|NUP54|HNRNPA1|MAGOHB|NUP85|UPF3A|SARNP|FMR1|THOC2|HNRNPA2B1	http://amigo.geneontology.org/amigo/term/GO:0051028
telomere maintenance via semi-conservative replication	Gene Ontology	GO:0032201	7	34	0.00145891	0.0203642	ACD|RFC5|CTC1|TERF2|POLD3|POLD4|RFC4	http://amigo.geneontology.org/amigo/term/GO:0032201
negative regulation of neuron death	Gene Ontology	GO:1901215	10	64	0.00146797	0.0203642	HSF1|MDK|STAT3|TMEM259|EIF4G1|ATP13A2|CTNNB1|AKT1|IKBKG|FBXO7	http://amigo.geneontology.org/amigo/term/GO:1901215
mRNA processing	Gene Ontology	GO:0006397	34	385	0.00149388	0.0203642	HSF1|CIR1|ZRANB2|CSTF1|AAR2|SF3B3|WDR83|FMR1|TXNL4A|ESS2|SRSF3|PRPF31|PRPF40A|HNRNPA2B1|RBM39|TSEN2|NSRP1|SMNDC1|HNRNPA1|LSM1|USP39|IK|TSEN54|THOC2|NOL3|RALY|NBDY|SRRM2|MAGOHB|U2AF1L4|DDX5|PRKACA|RBM23|BUD31	http://amigo.geneontology.org/amigo/term/GO:0006397
protein polyubiquitination	Gene Ontology	GO:0000209	26	270	0.00156991	0.0203642	RNF14|UBE2J2|UBE2D3|CTNNB1|FBXO4|FBXO7|JADE2|RNF31|UBOX5|UBE3B|MIB2|TRAF3IP2|PSMC2|FBXO44|CDKN2A|ARIH2|SPOP|TPP2|AKTIP|CHFR|UBR5|MGRN1|RUSC1|UBC|TRIM5|UBE2T	http://amigo.geneontology.org/amigo/term/GO:0000209
regulation of transcription initiation from RNA polymerase II promoter	Gene Ontology	GO:0060260	9	54	0.00157404	0.0203642	CDKN2A|TRIM28|MECP2|MED25|TCF7L2|CTNNB1|MED15|MED4|AGO3	http://amigo.geneontology.org/amigo/term/GO:0060260
respiratory electron transport chain	Gene Ontology	GO:0022904	5	18	0.00172352	0.0206295	ETFA|NDUFA5|POLG2|ETFRF1|MYBBP1A	http://amigo.geneontology.org/amigo/term/GO:0022904
myoblast differentiation	Gene Ontology	GO:0045445	5	18	0.00172352	0.0206295	SHH|DDX5|DTYMK|MAPK12|HMGCR	http://amigo.geneontology.org/amigo/term/GO:0045445
base-excision repair, gap-filling	Gene Ontology	GO:0006287	7	35	0.00174404	0.0206295	SMUG1|RFC5|RFC4|APEX1|POLD3|POLD4|OGG1	http://amigo.geneontology.org/amigo/term/GO:0006287
negative regulation of protein kinase activity	Gene Ontology	GO:0006469	12	89	0.00192892	0.0212318	DBNDD2|DBNDD1|MBIP|ITGB1BP1|PKIG|CHP1|CEACAM1|AKT1|GSTP1|CDKN2A|SMYD3|CEP85	http://amigo.geneontology.org/amigo/term/GO:0006469
positive regulation of type I interferon production	Gene Ontology	GO:0032481	9	56	0.00204654	0.0212318	IRF3|IRF7|PLCG2|CTNNB1|POLR3G|IFI16|POLR1D|IRAK1|POLR2H	http://amigo.geneontology.org/amigo/term/GO:0032481
spindle assembly	Gene Ontology	GO:0051225	7	36	0.00207061	0.0212318	RCC1|HDAC3|HAUS8|CEP63|TUBB|CSNK1D|RPS3	http://amigo.geneontology.org/amigo/term/GO:0051225
type I interferon signaling pathway	Gene Ontology	GO:0060337	10	67	0.00209296	0.0212318	IRF3|IFITM1|IRF7|STAT1|OAS1|TYK2|IRAK1|IFIT3|IP6K2|SP100	http://amigo.geneontology.org/amigo/term/GO:0060337
nucleobase-containing small molecule interconversion	Gene Ontology	GO:0015949	6	27	0.00210267	0.0212318	NME4|DCTD|NUDT13|GUK1|DTYMK|TXNRD1	http://amigo.geneontology.org/amigo/term/GO:0015949
response to light stimulus	Gene Ontology	GO:0009416	6	27	0.00210267	0.0212318	RIC8A|COPS3|ASNS|DNM2|DYNLRB1|OGG1	http://amigo.geneontology.org/amigo/term/GO:0009416
regulation of double-strand break repair via homologous recombination	Gene Ontology	GO:0010569	5	19	0.00224121	0.0220919	SPIDR|RAD51AP1|PPP4C|SIRT6|KDM1A	http://amigo.geneontology.org/amigo/term/GO:0010569
vesicle fusion	Gene Ontology	GO:0006906	7	37	0.00244249	0.0231696	STX8|TSNARE1|STX3|STX2|CHP1|STX11|SNAP23	http://amigo.geneontology.org/amigo/term/GO:0006906
cell division	Gene Ontology	GO:0051301	35	412	0.00246247	0.0231696	TSG101|BIRC5|CENPS-CORT|EPB41|ITGB3BP|RPS3|CHMP3|TXNL4A|PRC1|HAUS8|ANAPC15|MASTL|PRPF40A|AURKB|LZTS2|ZNF207|VRK1|CEP63|SPAG5|USP39|USP16|CHFR|CENPT|ANAPC5|ANAPC7|DIS3L2|KNSTRN|RCC1|PSRC1|PPP1CA|CHEK2|TUBB|BOD1|KLHDC8B|CDK6	http://amigo.geneontology.org/amigo/term/GO:0051301
protein stabilization	Gene Ontology	GO:0050821	20	195	0.0025222	0.0232042	CD74|ZNF207|TRIM39|CDKN2A|PEX6|PHB2|PHB|RPL5|CHP1|RPL23|SUMO1|USP19|ZSWIM7|LAMP2|CTNND1|TBRG1|TELO2|USP33|CHEK2|WDR81	http://amigo.geneontology.org/amigo/term/GO:0050821
protein complex oligomerization	Gene Ontology	GO:0051259	5	20	0.00286345	0.0252249	HSCB|OAS1|CHP1|NOL3|OPA1	http://amigo.geneontology.org/amigo/term/GO:0051259
nucleotide-excision repair, DNA incision	Gene Ontology	GO:0033683	7	38	0.00286369	0.0252249	RFC5|RFC4|FAN1|POLD3|POLD4|UBC|OGG1	http://amigo.geneontology.org/amigo/term/GO:0033683
telomere maintenance via telomerase	Gene Ontology	GO:0007004	6	29	0.00309169	0.0266659	ACD|TERF2|PINX1|PIF1|PPP6R3|TELO2	http://amigo.geneontology.org/amigo/term/GO:0007004
cellular response to cadmium ion	Gene Ontology	GO:0071276	7	39	0.00333835	0.0278004	HSF1|STAR|SUMO1|UBE2D3|AKT1|MAPK8|OGG1	http://amigo.geneontology.org/amigo/term/GO:0071276
ciliary basal body-plasma membrane docking	Gene Ontology	GO:0097711	12	95	0.00335754	0.0278004	C2CD3|CEP131|HAUS8|SSNA1|CEP63|TCTN1|TUBB|CEP192|MKS1|CSNK1D|PRKACA|DCTN2	http://amigo.geneontology.org/amigo/term/GO:0097711
transcription-coupled nucleotide-excision repair	Gene Ontology	GO:0006283	10	72	0.00359569	0.0281325	HMGN1|COPS2|RFC4|UBC|RFC5|POLD3|POLD4|COPS3|COPS7B|POLR2H	http://amigo.geneontology.org/amigo/term/GO:0006283
endoplasmic reticulum mannose trimming	Gene Ontology	GO:1904380	5	21	0.00360151	0.0281325	OS9|MAN1B1|DERL2|UGGT2|UBC	http://amigo.geneontology.org/amigo/term/GO:1904380
vesicle docking	Gene Ontology	GO:0048278	5	21	0.00360151	0.0281325	STX11|STX8|STX3|STX2|TSNARE1	http://amigo.geneontology.org/amigo/term/GO:0048278
positive regulation of protein targeting to mitochondrion	Gene Ontology	GO:1903955	6	31	0.00439173	0.0331277	ARIH2|UBE2J2|UBE2D3|PRKAA1|SAE1|RNF31	http://amigo.geneontology.org/amigo/term/GO:1903955
cellular lipid metabolic process	Gene Ontology	GO:0044255	5	22	0.00446663	0.0331277	ABHD3|STAR|FAM135A|INPPL1|PEX5	http://amigo.geneontology.org/amigo/term/GO:0044255
negative regulation of transcription, DNA-templated	Gene Ontology	GO:0045892	46	601	0.00448104	0.0331277	SMARCC2|KDM1A|HDAC3|CIR1|HDAC5|HSF4|COPS2|BIRC5|ZNF219|SUDS3|CTNNB1|TRIM28|ELF2|EHMT1|ASAH1|CHD8|SOX13|CTBP1|APEX1|SUMO1|IFI16|PHC2|YAF2|PPHLN1|CDKN2A|PFDN5|SHC1|MECP2|HMGA1|ENO1|PHB2|NR2C1|SCMH1|ING4|RCOR3|ZNF639|PHB|TCF7L2|ZGPAT|YY1AP1|MYBBP1A|HDAC10|KDM5C|PTPRK|ILF3|SP100	http://amigo.geneontology.org/amigo/term/GO:0045892
nucleotide metabolic process	Gene Ontology	GO:0009117	6	32	0.00517487	0.037124	NME4|ASMTL|NME6|AMPD3|AMPD2|NT5C3B	http://amigo.geneontology.org/amigo/term/GO:0009117
stress granule assembly	Gene Ontology	GO:0034063	5	23	0.00546997	0.037124	PRRC2C|ATXN2L|YTHDF1|LSM14A|CIRBP	http://amigo.geneontology.org/amigo/term/GO:0034063
nucleotide-excision repair, DNA gap filling	Gene Ontology	GO:0006297	5	23	0.00546997	0.037124	RFC5|RFC4|POLD3|POLD4|UBC	http://amigo.geneontology.org/amigo/term/GO:0006297
peroxisome organization	Gene Ontology	GO:0007031	5	23	0.00546997	0.037124	PEX10|PEX6|PEX2|PEX5|PEX16	http://amigo.geneontology.org/amigo/term/GO:0007031
ribosomal large subunit assembly	Gene Ontology	GO:0000027	5	23	0.00546997	0.037124	RPLP0|MDN1|RPL5|MRPL20|RPL23A	http://amigo.geneontology.org/amigo/term/GO:0000027
tRNA aminoacylation for protein translation	Gene Ontology	GO:0006418	7	43	0.00585699	0.0391096	AIMP2|CARS2|YARS1|CARS1|PPA2|KARS1|HARS1	http://amigo.geneontology.org/amigo/term/GO:0006418
IRE1-mediated unfolded protein response	Gene Ontology	GO:0036498	8	54	0.00596132	0.0391744	SRPRB|SHC1|SRPRA|HYOU1|DDX11|TATDN2|HDGF|SEC31A	http://amigo.geneontology.org/amigo/term/GO:0036498
cellular senescence	Gene Ontology	GO:0090398	5	24	0.00662246	0.0424827	TERF2|MAGEA2|HRAS|CDKN2A|OPA1	http://amigo.geneontology.org/amigo/term/GO:0090398
phospholipid biosynthetic process	Gene Ontology	GO:0008654	8	55	0.00666999	0.0424827	TAMM41|PCYT2|CHPT1|AGPAT3|LPCAT3|LPCAT1|CHKA|AGPAT2	http://amigo.geneontology.org/amigo/term/GO:0008654
cell cycle arrest	Gene Ontology	GO:0007050	14	130	0.00691008	0.0428651	TSG101|MLF1|CDKN2A|MAPK12|TBRG1|PKD1|TCF7L2|CGRRF1|LAMTOR4|PRKAA1|CDK6|ING4|PPP1R9B|HRAS	http://amigo.geneontology.org/amigo/term/GO:0007050
phosphatidylcholine biosynthetic process	Gene Ontology	GO:0006656	6	34	0.00704064	0.0428651	SLC44A3|CHPT1|LPCAT3|LPCAT1|ABHD3|CHKA	http://amigo.geneontology.org/amigo/term/GO:0006656
positive regulation of telomere maintenance via telomerase	Gene Ontology	GO:0032212	6	34	0.00704064	0.0428651	ACD|HNRNPA1|MAP3K4|CTNNB1|FBXO4|AURKB	http://amigo.geneontology.org/amigo/term/GO:0032212
DNA replication	Gene Ontology	GO:0006260	16	158	0.00730803	0.0438482	NASP|ORC5|DDX11|RFC5|TBRG1|POLG2|RFC4|ORC3|MCM7|CDC45|PIF1|POLD3|PTMS|NAP1L1|ING4|POLD4	http://amigo.geneontology.org/amigo/term/GO:0006260
visual learning	Gene Ontology	GO:0008542	7	45	0.00754987	0.0446521	RIC8A|MECP2|DDHD2|MEIS2|HMGCR|GRIN1|CTNS	http://amigo.geneontology.org/amigo/term/GO:0008542
RNA splicing, via transesterification reactions	Gene Ontology	GO:0000375	5	25	0.00793476	0.0462675	SMNDC1|TXNL4A|LSM1|SF3B3|WDR83	http://amigo.geneontology.org/amigo/term/GO:0000375
cellular response to ionizing radiation	Gene Ontology	GO:0071479	6	35	0.00813648	0.0467848	SPIDR|TANK|EEF1D|RAD51AP1|IFI16|FBXO4	http://amigo.geneontology.org/amigo/term/GO:0071479
DNA duplex unwinding	Gene Ontology	GO:0032508	10	81	0.00834107	0.0473042	CHD4|SUB1|RFC5|CHD8|DDX11|MCM7|PIF1|RFC4|FBH1|MCM9	http://amigo.geneontology.org/amigo/term/GO:0032508
carbohydrate metabolic process	Gene Ontology	GO:0005975	22	247	0.00859264	0.0477468	B4GALNT1|MAN1B1|AKT1|POFUT2|PPP1R2|AMDHD2|LDHA|LDHC|MAN2A2|PIGQ|NPL|MANBA|GALK2|SLC2A8|HEXA|PPP1CA|PGLS|HEXD|FUT2|POMT1|CHID1|XYLB	http://amigo.geneontology.org/amigo/term/GO:0005975
chromosome segregation	Gene Ontology	GO:0007059	11	94	0.00864978	0.0477468	KNSTRN|RCC1|ZNF207|BIRC5|SPAG5|RPS3|NDEL1|CENPT|CEP85|NEK11|MMS19	http://amigo.geneontology.org/amigo/term/GO:0007059
positive regulation of smoothened signaling pathway	Gene Ontology	GO:0045880	6	36	0.00934966	0.0502696	RAB34|GAS8|STK36|SHH|TEDC1|TTC23	http://amigo.geneontology.org/amigo/term/GO:0045880
translesion synthesis	Gene Ontology	GO:0019985	6	36	0.00934966	0.0502696	RFC5|RFC4|POLD3|POLD4|PRIMPOL|UBC	http://amigo.geneontology.org/amigo/term/GO:0019985
regulation of exit from mitosis	Gene Ontology	GO:0007096	6	37	0.0106865	0.0565227	ANAPC15|UBC|PPP1R9B|ANAPC5|ANAPC7|NPM2	http://amigo.geneontology.org/amigo/term/GO:0007096
G2/M transition of mitotic cell cycle	Gene Ontology	GO:0000086	14	137	0.0107857	0.0565227	LCMT1|TAF2|HAUS8|SSNA1|CEP63|CEP131|MASTL|TUBB|CEP192|CSNK1D|PRKACA|DNM2|DCTN2|CHEK2	http://amigo.geneontology.org/amigo/term/GO:0000086
pancreas development	Gene Ontology	GO:0031016	5	27	0.0110796	0.0568225	CTNNB1|SHH|MEIS2|TCF7L2|SELENOT	http://amigo.geneontology.org/amigo/term/GO:0031016
regulation of macroautophagy	Gene Ontology	GO:0016241	9	72	0.0111175	0.0568225	EXOC1|EXOC7|SNX5|ATP13A2|ATP6V1E1|PRKAA1|PRKACA|LAMTOR4|MAPK8	http://amigo.geneontology.org/amigo/term/GO:0016241
viral transcription	Gene Ontology	GO:0019083	12	111	0.0115333	0.0582293	RPS18|NUP62|RPL23A|RPSA|NUP54|RPS19|RPLP0|NUP85|RPL23|RPL5|RPL13A|RPS3	http://amigo.geneontology.org/amigo/term/GO:0019083
RNA phosphodiester bond hydrolysis	Gene Ontology	GO:0090501	6	38	0.0121533	0.0598985	DROSHA|RNASE4|RPP21|RPP14|TSEN2|DIS3L2	http://amigo.geneontology.org/amigo/term/GO:0090501
DNA damage response, detection of DNA damage	Gene Ontology	GO:0042769	6	38	0.0121533	0.0598985	RFC5|RFC4|POLD3|POLD4|UBC|RPS3	http://amigo.geneontology.org/amigo/term/GO:0042769
protein sumoylation	Gene Ontology	GO:0016925	8	61	0.0123352	0.0600797	CDKN2A|TRIM28|NUP54|SUMO1|NUP85|SAE1|TRPM4|NUP62	http://amigo.geneontology.org/amigo/term/GO:0016925
cytoplasmic translation	Gene Ontology	GO:0002181	10	86	0.0125183	0.0602623	RPL22L1|RPS18|RPL5|RPSA|RPL23A|RPS19|RPLP0|RPL23|RPL13A|RPS3	http://amigo.geneontology.org/amigo/term/GO:0002181
nucleocytoplasmic transport	Gene Ontology	GO:0006913	5	28	0.0129313	0.0608359	NUTF2|UPF3A|NUP62|NUP85|NUP54	http://amigo.geneontology.org/amigo/term/GO:0006913
autophagosome maturation	Gene Ontology	GO:0097352	5	28	0.0129313	0.0608359	TSG101|CHMP3|GABARAPL1|LAMP2|MFSD8	http://amigo.geneontology.org/amigo/term/GO:0097352
intracellular transport of virus	Gene Ontology	GO:0075733	7	50	0.0133315	0.062014	TSG101|UBAP1|NUP62|NUP54|NUP85|UBC|MVB12A	http://amigo.geneontology.org/amigo/term/GO:0075733
tRNA processing	Gene Ontology	GO:0008033	11	101	0.01444	0.0664241	OSGEP|RPP21|TRMT44|DUS4L|CTU2|RPP14|TSEN2|TSEN54|TRPT1|KARS1|ELP2	http://amigo.geneontology.org/amigo/term/GO:0008033
RNA phosphodiester bond hydrolysis, endonucleolytic	Gene Ontology	GO:0090502	8	63	0.0148392	0.0667763	DROSHA|RNASE4|RPP21|APEX1|RPP14|TSEN2|RNASEK|AGO3	http://amigo.geneontology.org/amigo/term/GO:0090502
COPII vesicle coating	Gene Ontology	GO:0048208	8	63	0.0148392	0.0667763	SERPINA1|TRAPPC3|TRAPPC4|CSNK1D|USO1|PPP6R3|PDCD6|SEC31A	http://amigo.geneontology.org/amigo/term/GO:0048208
cell projection organization	Gene Ontology	GO:0030030	18	201	0.015571	0.0693161	C2CD3|IFT43|CCDC66|TCTN1|ODF2L|CDK10|CEP131|FUZ|CCDC78|MKS1|NUBP2|AKT1|RAB34|STK36|TTC12|JHY|MACIR|TMEM107	http://amigo.geneontology.org/amigo/term/GO:0030030
phosphorylation	Gene Ontology	GO:0016310	49	697	0.0158883	0.069976	PCK2|RPS6KC1|AGK|PI4KB|ADCK2|WDR83|NMRK1|AKT1|MAPK12|IKBKE|TYK2|NEK11|CDK2AP2|DGKZ|STAT3|CDK10|MASTL|STK25|MAP3K4|RPS6KB2|CHKA|CSNK1D|DMPK|MARK3|PRKACA|MAPK8|IRAK1|PIP4K2A|IRAK4|CDKN2A|VRK1|STK36|VRK3|VRK2|GUK1|PRKAA1|EPS8L1|IP6K2|NME4|NME6|GALK2|CHEK2|PKIG|NAGK|DTYMK|CDK6|AURKB|PAK4|XYLB	http://amigo.geneontology.org/amigo/term/GO:0016310
protein glycosylation	Gene Ontology	GO:0006486	16	173	0.0165186	0.0719863	ST3GAL3|MAN1B1|MGAT1|GALNT11|UGGT2|ST3GAL4|MAN2A2|KRTCAP2|SRD5A3|C1GALT1|FUT2|TMTC1|POMT1|ALG12|POFUT2|DPM1	http://amigo.geneontology.org/amigo/term/GO:0006486
SRP-dependent cotranslational protein targeting to membrane	Gene Ontology	GO:0006614	10	90	0.0168621	0.0725009	RPS18|RPL5|RPSA|RPL23A|SRPRA|RPS19|RPLP0|RPL23|RPL13A|RPS3	http://amigo.geneontology.org/amigo/term/GO:0006614
regulation of gene expression	Gene Ontology	GO:0010468	26	325	0.0169869	0.0725009	TRIM39|PRKAA1|NFKBIZ|PLCG2|AFF1|POFUT2|DROSHA|MAP3K4|PCBP4|PCBP2|NOL3|ZFP64|HNRNPD|TRIM26|RFXANK|MECP2|USP16|SHH|TMEM107|BRD2|IRF3|CTNNB1|IRF7|CDK6|TRIM5|YBX3	http://amigo.geneontology.org/amigo/term/GO:0010468
lysosome localization	Gene Ontology	GO:0032418	5	30	0.0172375	0.0728198	KLC2|DEF8|TMEM106B|RAB34|NDEL1	http://amigo.geneontology.org/amigo/term/GO:0032418
cellular response to insulin stimulus	Gene Ontology	GO:0032869	11	105	0.0188498	0.0766364	PCK2|HDAC5|STAT1|RHOQ|IRS1|CAPN10|CEACAM1|AKT1|GSTP1|STAR|SRD5A1	http://amigo.geneontology.org/amigo/term/GO:0032869
nuclear-transcribed mRNA catabolic process, nonsense-mediated decay	Gene Ontology	GO:0000184	12	119	0.0191916	0.0766364	RPS18|RPL5|RPL23A|RPSA|RPS19|RPLP0|MAGOHB|RPL23|RPL13A|UPF3A|RPS3|EIF4G1	http://amigo.geneontology.org/amigo/term/GO:0000184
mitochondrial respiratory chain complex I assembly	Gene Ontology	GO:0032981	8	66	0.0192583	0.0766364	NDUFA5|NDUFA2|NDUFB7|COA1|TAZ|NDUFAF6|ECSIT|NDUFAF2	http://amigo.geneontology.org/amigo/term/GO:0032981
regulation of circadian rhythm	Gene Ontology	GO:0042752	8	66	0.0192583	0.0766364	HDAC3|PPP1CA|PRKAA1|CSNK1D|ATG7|MAPK8|HNRNPD|CREM	http://amigo.geneontology.org/amigo/term/GO:0042752
viral entry into host cell	Gene Ontology	GO:0046718	10	92	0.0194108	0.0766364	EFNB2|SLC20A2|ZNF639|ITGB5|RPSA|PHB|SCARB1|CD46|SIVA1|ITGAV	http://amigo.geneontology.org/amigo/term/GO:0046718
histone deacetylation	Gene Ontology	GO:0016575	6	42	0.0194368	0.0766364	HDAC3|HDAC5|PHB|SUDS3|RCOR3|HDAC10	http://amigo.geneontology.org/amigo/term/GO:0016575
positive regulation of protein import into nucleus	Gene Ontology	GO:0042307	6	42	0.0194368	0.0766364	NUTF2|HDAC3|TRIM28|JUP|SHH|UBR5	http://amigo.geneontology.org/amigo/term/GO:0042307
interstrand cross-link repair	Gene Ontology	GO:0036297	7	54	0.0198337	0.0774639	FAN1|RAD51AP1|FANCC|HROB|UBC|UBE2T|FANCI	http://amigo.geneontology.org/amigo/term/GO:0036297
RNA export from nucleus	Gene Ontology	GO:0006405	7	55	0.0217535	0.0841676	NUP62|SRSF3|HNRNPA1|MAGOHB|U2AF1L4|SARNP|THOC2	http://amigo.geneontology.org/amigo/term/GO:0006405
positive regulation of cell cycle arrest	Gene Ontology	GO:0071158	5	32	0.0223992	0.0850758	MED25|CDKN2A|PRKACA|RPL23|MYBBP1A	http://amigo.geneontology.org/amigo/term/GO:0071158
microtubule bundle formation	Gene Ontology	GO:0001578	5	32	0.0223992	0.0850758	ZNF207|PSRC1|CCDC66|CHP1|PRC1	http://amigo.geneontology.org/amigo/term/GO:0001578
defense response to virus	Gene Ontology	GO:0051607	18	210	0.0231917	0.087285	IRF3|ILF3|IFITM1|EXOC1|IRF7|STAT1|IFIT3|LSM14A|OAS1|POLR3G|IFI16|PCBP2|ATG7|MLKL|NLRP1|NLRC5|TRIM5|MICA	http://amigo.geneontology.org/amigo/term/GO:0051607
mitochondrion organization	Gene Ontology	GO:0007005	10	95	0.0237469	0.0885696	TMEM11|PEX5|SPG7|PHB2|PHB|POLG2|TAZ|WDR81|MTX1|OPA1	http://amigo.geneontology.org/amigo/term/GO:0007005
cell migration	Gene Ontology	GO:0016477	21	257	0.0242574	0.0891329	KNSTRN|DGKZ|LAMA3|ITGB5|PTPRK|PHB2|CD44|RHOQ|NDEL1|SCYL3|PRPF40A|CEACAM1|JUP|IGFBP6|ITGAV|USP33|L1CAM|PAK4|MDK|PPP1R9B|ITGB1BP1	http://amigo.geneontology.org/amigo/term/GO:0016477
insulin receptor signaling pathway	Gene Ontology	GO:0008286	9	82	0.0244135	0.0891329	ATP6V1F|SHC1|SLC2A8|GRB10|RHOQ|ATP6V1E1|IRS1|AKT1|NDEL1	http://amigo.geneontology.org/amigo/term/GO:0008286
interferon-gamma-mediated signaling pathway	Gene Ontology	GO:0060333	8	69	0.0245438	0.0891329	IRF3|IRF7|STAT1|CD44|TRIM26|OAS1|TRIM5|SP100	http://amigo.geneontology.org/amigo/term/GO:0060333
peptidyl-serine phosphorylation	Gene Ontology	GO:0018105	15	167	0.0250855	0.0903078	VRK1|MAPK12|VRK3|VRK2|PKD1|MARK3|MASTL|RPS6KB2|AKT1|CSNK1D|PRKACA|DMPK|IKBKE|MAPK8|CHEK2	http://amigo.geneontology.org/amigo/term/GO:0018105
negative regulation of fibroblast proliferation	Gene Ontology	GO:0048147	5	33	0.0253177	0.0903579	FBXO4|GSTP1|PEX2|MED25|PAWR	http://amigo.geneontology.org/amigo/term/GO:0048147
regulation of signal transduction by p53 class mediator	Gene Ontology	GO:1901796	14	153	0.0259004	0.0916474	EHMT1|CDKN2A|CHD4|RFC5|RFC4|RPL5|PRR5|PRKAA1|SETD9|AKT1|CHEK2|AURKB|PIP4K2A|TAF2	http://amigo.geneontology.org/amigo/term/GO:1901796
cell-matrix adhesion	Gene Ontology	GO:0007160	10	97	0.0270007	0.0947312	ITGB5|CD44|PKD1|ITGAV|MUC4|CTNNB1|PXN|L1CAM|ITGB1BP1|ADAM15	http://amigo.geneontology.org/amigo/term/GO:0007160
positive regulation of I-kappaB kinase/NF-kappaB signaling	Gene Ontology	GO:0043123	16	184	0.0276536	0.0962065	CD74|IRF3|NUP62|EEF1D|LITAF|MIB2|CTNNB1|LGALS9|TSPAN6|IKBKG|IKBKE|TRAF3IP2|IRAK1|TRIM5|IRAK4|RNF31	http://amigo.geneontology.org/amigo/term/GO:0043123
cellular amino acid metabolic process	Gene Ontology	GO:0006520	5	34	0.0284689	0.0978037	GOT2|GCAT|SCLY|CTNS|ASNS	http://amigo.geneontology.org/amigo/term/GO:0006520
cellular response to organic cyclic compound	Gene Ontology	GO:0071407	8	71	0.0285852	0.0978037	HSF1|STAR|STAT1|AKT1|STAT3|SRD5A1|PPP1R9B|P2RY6	http://amigo.geneontology.org/amigo/term/GO:0071407
endosome to lysosome transport	Gene Ontology	GO:0008333	6	46	0.0292369	0.0992137	TSG101|STX8|AKTIP|CHMP3|MGRN1|SNX27	http://amigo.geneontology.org/amigo/term/GO:0008333
negative regulation of protein binding	Gene Ontology	GO:0032091	8	72	0.0307686	0.103563	KDM1A|PPP1CA|DDX11|AKT1|AURKB|MAPK8|USP33|ITGB1BP1	http://amigo.geneontology.org/amigo/term/GO:0032091
skin development	Gene Ontology	GO:0043588	6	47	0.0321136	0.10636	ATP8A2|PKD1|CTNNB1|JUP|SHH|TRAF3IP2	http://amigo.geneontology.org/amigo/term/GO:0043588
non-motile cilium assembly	Gene Ontology	GO:1905515	6	47	0.0321136	0.10636	C2CD3|CEP131|FUZ|MKS1|CSNK1D|TMEM107	http://amigo.geneontology.org/amigo/term/GO:1905515
positive regulation of DNA-binding transcription factor activity	Gene Ontology	GO:0051091	11	115	0.0341375	0.111391	HSF1|KDM1A|HDAC5|AKT1|PHB2|TRIM26|CTNNB1|PLCG2|JUP|TRIM5|SP100	http://amigo.geneontology.org/amigo/term/GO:0051091
DNA recombination	Gene Ontology	GO:0006310	10	101	0.0344398	0.111391	SPIDR|APEX1|RAD51AP1|PIF1|ZSWIM7|HROB|HDAC10|POLM|INO80B|INO80C	http://amigo.geneontology.org/amigo/term/GO:0006310
mRNA export from nucleus	Gene Ontology	GO:0006406	10	101	0.0344398	0.111391	NUP62|MCM3AP|SRSF3|NUP54|MAGOHB|NUP85|U2AF1L4|SARNP|THOC2|HNRNPA2B1	http://amigo.geneontology.org/amigo/term/GO:0006406
RNA metabolic process	Gene Ontology	GO:0016070	6	48	0.0351682	0.112866	HNRNPA1|LSM1|PCBP2|HNRNPA2B1|HNRNPD|POLR2H	http://amigo.geneontology.org/amigo/term/GO:0016070
DNA biosynthetic process	Gene Ontology	GO:0071897	5	36	0.035488	0.113015	POLG2|PHB|POLM|POLD3|HROB	http://amigo.geneontology.org/amigo/term/GO:0071897
nucleic acid phosphodiester bond hydrolysis	Gene Ontology	GO:0090305	12	131	0.0370242	0.117008	REXO1|DROSHA|RNASE4|TATDN2|FAN1|MGME1|APEX1|TSEN2|RNASEK|TDP1|AGO3|DIS3L2	http://amigo.geneontology.org/amigo/term/GO:0090305
ubiquitin-dependent ERAD pathway	Gene Ontology	GO:0030433	8	75	0.037997	0.119173	OS9|FBXO44|UBE2J2|JKAMP|FAF2|MAN1B1|DERL2|USP19	http://amigo.geneontology.org/amigo/term/GO:0030433
nucleotide-excision repair, DNA incision, 5'-to lesion	Gene Ontology	GO:0006296	5	37	0.0393632	0.122529	RFC5|RFC4|POLD3|POLD4|UBC	http://amigo.geneontology.org/amigo/term/GO:0006296
regulation of mRNA stability	Gene Ontology	GO:0043488	11	118	0.0400677	0.123791	EIF4G1|PCBP4|APEX1|AKT1|YTHDF1|PUM1|UBC|FMR1|PSMC2|EXOSC1|HNRNPD	http://amigo.geneontology.org/amigo/term/GO:0043488
intracellular protein transport	Gene Ontology	GO:0006886	24	320	0.0408575	0.125296	CD74|SNX2|CTTN|SNX5|ACD|ARFRP1|VPS29|SEC31A|SRPRA|STX2|PDCD6|ARFIP1|SIL1|USO1|BCAP29|BCAP31|STX8|TBC1D22B|STX3|TBC1D22A|STX11|TSNARE1|IPO4|SNX27	http://amigo.geneontology.org/amigo/term/GO:0006886
regulation of translation	Gene Ontology	GO:0006417	13	149	0.0430944	0.131184	EIF4G1|LARP6|RPL13A|EIF2B4|AKT1|PUM1|RPS3|SARNP|FMR1|CNOT2|CNOT1|LSM14A|AGO3	http://amigo.geneontology.org/amigo/term/GO:0006417
negative regulation of extrinsic apoptotic signaling pathway	Gene Ontology	GO:2001237	5	38	0.0434859	0.13141	ITGAV|GSTP1|CTTN|TCF7L2|NOL3	http://amigo.geneontology.org/amigo/term/GO:2001237
viral protein processing	Gene Ontology	GO:0019082	5	39	0.0478579	0.142541	ST3GAL3|MAN1B1|ST3GAL4|SUMO1|MGAT1	http://amigo.geneontology.org/amigo/term/GO:0019082
mitotic spindle assembly	Gene Ontology	GO:0090307	5	39	0.0478579	0.142541	ZNF207|LSM14A|CHEK2|TASOR|CEP192	http://amigo.geneontology.org/amigo/term/GO:0090307
steroid biosynthetic process	Gene Ontology	GO:0006694	7	65	0.0483188	0.142886	STAR|CYB5R1|PRKAA1|LSS|HMGCR|FDXR|SRD5A1	http://amigo.geneontology.org/amigo/term/GO:0006694
protein ubiquitination	Gene Ontology	GO:0016567	41	614	0.0512628	0.148814	RNF14|TRIM39|KLHL20|UBE2J2|UBE2D3|AKT1|FBXO4|ELOC|FBXO7|PEX10|PEX13|JADE2|RNF31|UBOX5|UBE3B|MIB2|NEURL3|UBR5|PDCD6|ZSWIM8|OS9|TRIM28|ARIH2|SPOP|TRIM26|H2BC5|CHFR|MARCHF2|ANAPC5|FBH1|ANAPC7|SOCS7|PEX2|PEX5|TRIM5|RNF181|RNFT2|SAE1|UBC|MGRN1|UBE2T	http://amigo.geneontology.org/amigo/term/GO:0016567
protein phosphopantetheinylation	Gene Ontology	GO:0018215	17	215	0.0513117	0.148814	TTLL5|SAE1|ZDHHC16|ZDHHC5|ZDHHC7|GALNT11|PPT2|ABHD10|AKTIP|PAM|P4HB|MGAT1|C1GALT1|TTLL11|ATG7|PPT2-EGFL8|RNF14	http://amigo.geneontology.org/amigo/term/GO:0018215
negative regulation of canonical Wnt signaling pathway	Gene Ontology	GO:0090090	15	184	0.0518984	0.148814	CCDC88C|SDHAF2|NKD2|PFDN5|MDK|CHD8|SOX13|FUZ|TCF7L2|IGFBP6|CTNND1|SHH|LMBR1L|PSMC2|LZTS2	http://amigo.geneontology.org/amigo/term/GO:0090090
glycosphingolipid metabolic process	Gene Ontology	GO:0006687	5	40	0.0524804	0.148814	SUMF2|ASAH1|B4GALNT1|HEXA|CREM	http://amigo.geneontology.org/amigo/term/GO:0006687
cellular response to reactive oxygen species	Gene Ontology	GO:0034614	5	40	0.0524804	0.148814	AKT1|MAPK8|RPS3|PXN|PTPRK	http://amigo.geneontology.org/amigo/term/GO:0034614
mitotic metaphase plate congression	Gene Ontology	GO:0007080	5	40	0.0524804	0.148814	BOD1|PINX1|PSRC1|NUP62|DCTN2	http://amigo.geneontology.org/amigo/term/GO:0007080
aging	Gene Ontology	GO:0007568	15	185	0.0539285	0.15188	CASP7|PPP1R9B|STAT3|AURKB|ATP8A2|CTC1|LITAF|APEX1|AKT1|FBXO4|ATG7|HMGCR|OPA1|IRAK1|OGG1	http://amigo.geneontology.org/amigo/term/GO:0007568
methylation	Gene Ontology	GO:0032259	16	201	0.0546377	0.152838	KMT2C|EHMT1|TRMT44|KDM5C|MTRR|PRMT7|LCMT1|SHMT2|SETD9|METTL22|TARBP1|SMYD3|BUD23|NSD2|ASMTL|METTL15	http://amigo.geneontology.org/amigo/term/GO:0032259
JNK cascade	Gene Ontology	GO:0007254	6	54	0.057371	0.159407	GPS2|IKBKG|UBC|MAPK8|IRAK1|IRAK4	http://amigo.geneontology.org/amigo/term/GO:0007254
macroautophagy	Gene Ontology	GO:0016236	9	96	0.0579111	0.159835	TSG101|TOMM40|GABARAPL1|PRKAA1|ATG12|ATG7|CHMP3|HDAC10|MVB12A	http://amigo.geneontology.org/amigo/term/GO:0016236
histone H3 acetylation	Gene Ontology	GO:0043966	5	42	0.0624777	0.169266	ING4|WDR5|MCM3AP|MBIP|JADE2	http://amigo.geneontology.org/amigo/term/GO:0043966
positive regulation of substrate adhesion-dependent cell spreading	Gene Ontology	GO:1900026	5	42	0.0624777	0.169266	MDK|P4HB|DMTN|MYADM|DNM2	http://amigo.geneontology.org/amigo/term/GO:1900026
negative regulation of translation	Gene Ontology	GO:0017148	8	83	0.0625547	0.169266	CIRBP|LSM14A|RPL13A|RPS3|FMR1|CNOT1|SHMT2|ILF3	http://amigo.geneontology.org/amigo/term/GO:0017148
positive regulation of NIK/NF-kappaB signaling	Gene Ontology	GO:1901224	7	69	0.0630194	0.169416	C20orf27|PHB2|PHB|LGALS9|RPS3|IRAK1|AGO3	http://amigo.geneontology.org/amigo/term/GO:1901224
regulation of protein stability	Gene Ontology	GO:0031647	8	84	0.0661875	0.174788	HDAC3|CDKN2A|PINX1|FBXO4|LSS|FBXO7|USP19|LAMP2	http://amigo.geneontology.org/amigo/term/GO:0031647
negative regulation of protein ubiquitination	Gene Ontology	GO:0031397	6	56	0.0662845	0.174788	SIRT7|AKT1|CHP1|PINX1|RPS3|GLMN	http://amigo.geneontology.org/amigo/term/GO:0031397
negative regulation of phosphoprotein phosphatase activity	Gene Ontology	GO:0032515	6	56	0.0662845	0.174788	PPP1R2|BOD1|STYXL1|MASTL|PTPA|PPP1R9B	http://amigo.geneontology.org/amigo/term/GO:0032515
negative regulation of viral genome replication	Gene Ontology	GO:0045071	5	43	0.0678512	0.177787	OAS1|IFITM1|TNIP1|IFI16|ILF3	http://amigo.geneontology.org/amigo/term/GO:0045071
in utero embryonic development	Gene Ontology	GO:0001701	17	224	0.0696495	0.179755	C2CD3|CTNNB1|RIC8A|CIR1|TRIM28|NSRP1|RNASEH2B|COPS3|CHD8|PKD1|POLG2|EPN1|TERF2|MGAT1|TASOR|TCTN1|YBX3	http://amigo.geneontology.org/amigo/term/GO:0001701
protein localization	Gene Ontology	GO:0008104	12	145	0.069768	0.179755	PEX10|PEX2|PEX5|PEX26|PEX6|PAOX|MECP2|ACOX1|UBE2D3|UBC|NIN|PEX13	http://amigo.geneontology.org/amigo/term/GO:0008104
positive regulation of transcription, DNA-templated	Gene Ontology	GO:0045893	47	735	0.0703592	0.179755	SMARCC2|ACTA2|RNF14|TSG101|NUP85|CTNNB1|AKT1|MED4|DNM2|TEAD2|ELF2|ING4|MMS19|MDK|STAT3|SNX5|STAT1|CHD8|HNRNPD|YAF2|RBM23|ETV1|CDKN2A|TRIM28|SHC1|BCL9L|MECP2|HMGA1|USP16|SHH|NUP62|CD74|IRF3|PSRC1|IRF7|CNBP|CHEK2|MAZ|RBPMS|RUNX1|SRA1|PHB|BUD31|KARS1|TRIM5|ILF3|SP100	http://amigo.geneontology.org/amigo/term/GO:0045893
negative regulation of cell population proliferation	Gene Ontology	GO:0008285	31	458	0.0709985	0.179755	TSG101|TBRG1|SMAD6|AIMP2|CTNNB1|PINX1|IFIT3|FUZ|STAT3|INPPL1|ITGB1BP1|CDK10|LZTS2|HRAS|IFITM1|CDKN2A|ATP8A2|H2AC6|CGRRF1|IGFBP6|GLMN|NUP62|HMGA1|DIS3L2|PMP22|PHB|GAS8|CDK6|ING4|CTBP1|PTPRK	http://amigo.geneontology.org/amigo/term/GO:0008285
O-glycan processing	Gene Ontology	GO:0016266	6	57	0.0710272	0.179755	ST3GAL3|ST3GAL4|GALNT11|MUC4|C1GALT1|MUC5B	http://amigo.geneontology.org/amigo/term/GO:0016266
RNA processing	Gene Ontology	GO:0006396	9	100	0.0712072	0.179755	RBM6|DROSHA|LARP6|RBM39|RBPMS|TARBP1|TMTC1|EXOSC1|HNRNPD	http://amigo.geneontology.org/amigo/term/GO:0006396
mRNA 3'-end processing	Gene Ontology	GO:0031124	6	58	0.0759601	0.190591	SRSF3|MAGOHB|CSTF1|U2AF1L4|SARNP|THOC2	http://amigo.geneontology.org/amigo/term/GO:0031124
protein K63-linked ubiquitination	Gene Ontology	GO:0070534	5	45	0.07934	0.196687	TRAF3IP2|CDKN2A|TRIM5|UBE2T|ARIH2	http://amigo.geneontology.org/amigo/term/GO:0070534
toll-like receptor signaling pathway	Gene Ontology	GO:0002224	5	45	0.07934	0.196687	CNPY3|IRAK1|S100A1|LGMN|IRAK4	http://amigo.geneontology.org/amigo/term/GO:0002224
Wnt signaling pathway	Gene Ontology	GO:0016055	17	229	0.081536	0.200928	PORCN|NKD2|LMBR1L|CTNND1|LRRFIP2|CHD8|PKD1|CCDC88C|TCF7L2|CTNNB1|PLCG2|CSNK1D|PRKAA1|VPS29|UBC|LZTS2|BCL7B	http://amigo.geneontology.org/amigo/term/GO:0016055
apoptotic process	Gene Ontology	GO:0006915	44	692	0.0833674	0.204226	CARD6|TRIM39|ZDHHC16|FHIT|TM2D1|BIRC5|AIMP2|SIVA1|SUDS3|AKT1|ITGB3BP|RPS3|IKBKG|PAEP|CHMP3|TNFRSF12A|NLRP1|NLRP2|BCAP29|IFI16|RABEP1|PDCD6|CHEK2|HRAS|IRF3|CDKN2A|SMNDC1|UBE2D3|YARS1|DAP3|OPA1|ING4|PAWR|NOL3|BCAP31|CASP7|NME6|AKAP1|AKTIP|BCL7B|SRA1|PAK4|CDIP1|IFI27L1	http://amigo.geneontology.org/amigo/term/GO:0006915
cellular response to epidermal growth factor stimulus	Gene Ontology	GO:0071364	5	46	0.0854501	0.206879	MCM7|AKT1|GSTP1|PPP1R9B|KNSTRN	http://amigo.geneontology.org/amigo/term/GO:0071364
cellular response to virus	Gene Ontology	GO:0098586	5	46	0.0854501	0.206879	OAS1|IRF3|FMR1|LGALS9|IKBKE	http://amigo.geneontology.org/amigo/term/GO:0098586
xenobiotic metabolic process	Gene Ontology	GO:0006805	8	89	0.0862709	0.207652	CYP2C9|PAOX|NQO2|CES1|GSTA4|GSTP1|GUK1|CYP2R1	http://amigo.geneontology.org/amigo/term/GO:0006805
cell population proliferation	Gene Ontology	GO:0008283	12	151	0.0882299	0.210879	CD74|CTNNB1|STAT3|POLR3G|COPS2|MCM7|AKT1|YY1AP1|FPGS|AURKB|SHH|TXNRD1	http://amigo.geneontology.org/amigo/term/GO:0008283
autophagy	Gene Ontology	GO:0006914	14	183	0.0886301	0.210879	WDR41|GABARAPL1|TEX264|ATP13A2|IFI16|PRKAA1|TRAPPC4|ATG12|LAMP2|TMEM59|HDAC10|GRAMD1A|TRIM5|ATG7	http://amigo.geneontology.org/amigo/term/GO:0006914
generation of precursor metabolites and energy	Gene Ontology	GO:0006091	5	47	0.0917997	0.215938	FDXR|ACOX1|XYLB|COX7C|PPP1R2	http://amigo.geneontology.org/amigo/term/GO:0006091
interleukin-12-mediated signaling pathway	Gene Ontology	GO:0035722	5	47	0.0917997	0.215938	TYK2|RPLP0|P4HB|HNRNPA2B1|ANXA2	http://amigo.geneontology.org/amigo/term/GO:0035722
exocytosis	Gene Ontology	GO:0006887	10	121	0.0928331	0.217135	EXOC2|WASHC3|NKD2|EXOC7|SNAP23|ITSN1|STX3|STX2|STX11|EXOC1	http://amigo.geneontology.org/amigo/term/GO:0006887
endosomal transport	Gene Ontology	GO:0016197	8	91	0.0951989	0.221065	TSG101|UBAP1|ITSN1|ZFYVE9|UBC|CHMP3|MVB12A|SNX27	http://amigo.geneontology.org/amigo/term/GO:0016197
positive regulation of smooth muscle cell proliferation	Gene Ontology	GO:0048661	6	62	0.0975695	0.221065	STAT1|PHB|AKT1|HMGCR|IRAK1|IRAK4	http://amigo.geneontology.org/amigo/term/GO:0048661
cellular response to glucose starvation	Gene Ontology	GO:0042149	5	48	0.0983847	0.221065	IFI16|HNRNPA1|ASNS|PRKAA1|MYBBP1A	http://amigo.geneontology.org/amigo/term/GO:0042149
positive regulation of cell division	Gene Ontology	GO:0051781	5	48	0.0983847	0.221065	SHH|MDK|CSPP1|HDGF|ITGB1BP1	http://amigo.geneontology.org/amigo/term/GO:0051781
regulation of signal transduction	Gene Ontology	GO:0009966	5	48	0.0983847	0.221065	SPRED3|MGLL|KAZALD1|NUP62|PPP1R2	http://amigo.geneontology.org/amigo/term/GO:0009966
protein destabilization	Gene Ontology	GO:0031648	5	48	0.0983847	0.221065	CHFR|CDKN2A|CCDC88C|FBXO4|PEX2	http://amigo.geneontology.org/amigo/term/GO:0031648
cellular response to heat	Gene Ontology	GO:0034605	5	48	0.0983847	0.221065	HSF1|SUMO1|IRAK1|PRKACA|PDCD6	http://amigo.geneontology.org/amigo/term/GO:0034605
positive regulation of proteasomal ubiquitin-dependent protein catabolic process	Gene Ontology	GO:0032436	7	77	0.0997527	0.221065	RNF14|NKD2|ARIH2|SUMO1|AKT1|CSNK1D|CHFR	http://amigo.geneontology.org/amigo/term/GO:0032436
retrograde transport, endosome to Golgi	Gene Ontology	GO:0042147	7	77	0.0997527	0.221065	SNX2|SNX5|VPS29|ARFRP1|GCC2|VPS52|TMEM87A	http://amigo.geneontology.org/amigo/term/GO:0042147
electron transport chain	Gene Ontology	GO:0022900	8	92	0.099853	0.221065	ETFA|IDH3B|ADH5|NQO2|P4HA2|GFUS|SRD5A1|COX7C	http://amigo.geneontology.org/amigo/term/GO:0022900
amino acid transport	Gene Ontology	GO:0006865	6	63	0.103433	0.224501	SLC66A1|SLC7A6|SLC7A7|SLC6A12|SLC25A29|SLC43A1	http://amigo.geneontology.org/amigo/term/GO:0006865
response to estrogen	Gene Ontology	GO:0043627	6	63	0.103433	0.224501	STAR|SMAD6|RBBP5|DTYMK|SRD5A1|LDHA	http://amigo.geneontology.org/amigo/term/GO:0043627
excitatory postsynaptic potential	Gene Ontology	GO:0060079	6	63	0.103433	0.224501	CHRNA5|CHRNB1|MECP2|AKT1|SLC29A1|GRIN1	http://amigo.geneontology.org/amigo/term/GO:0060079
viral life cycle	Gene Ontology	GO:0019058	8	93	0.104633	0.224501	TSG101|UBAP1|NUP62|NUP54|NUP85|UBC|CHMP3|MVB12A	http://amigo.geneontology.org/amigo/term/GO:0019058
positive regulation of fibroblast proliferation	Gene Ontology	GO:0048146	5	49	0.105201	0.224501	CD74|CTC1|ANXA2|CDK6|RNASEH2B	http://amigo.geneontology.org/amigo/term/GO:0048146
response to UV	Gene Ontology	GO:0009411	5	49	0.105201	0.224501	CIRBP|MAPK8|PRKAA1|PRIMPOL|CASP7	http://amigo.geneontology.org/amigo/term/GO:0009411
positive regulation of phagocytosis	Gene Ontology	GO:0050766	5	49	0.105201	0.224501	GATA2|DNM2|IL15RA|MFGE8|LMAN2	http://amigo.geneontology.org/amigo/term/GO:0050766
ubiquitin-dependent protein catabolic process	Gene Ontology	GO:0006511	21	307	0.110819	0.235276	OS9|RNF14|UBL7|USP19|ARIH2|UBE3B|COPS3|UBE2D3|ANAPC15|FBXO4|WDR81|AURKB|FBXO7|USP16|CHFR|PSMC2|USP33|ANAPC5|USP32|ANAPC7|ELOC	http://amigo.geneontology.org/amigo/term/GO:0006511
phosphatidic acid biosynthetic process	Gene Ontology	GO:0006654	5	50	0.112243	0.236401	DGKZ|DDHD2|AGPAT3|AGPAT2|LPCAT1	http://amigo.geneontology.org/amigo/term/GO:0006654
mitotic spindle organization	Gene Ontology	GO:0007052	10	126	0.113338	0.236401	RCC1|BIRC5|NUP85|PTPA|ITGB3BP|AURKB|NDEL1|DCTN2|CENPT|MECP2	http://amigo.geneontology.org/amigo/term/GO:0007052
negative regulation of cell growth	Gene Ontology	GO:0030308	10	126	0.113338	0.236401	NME6|CDKN2A|PHB|PSRC1|CGRRF1|ENO1|FHL1|ADAM15|PPP1R9B|IP6K2	http://amigo.geneontology.org/amigo/term/GO:0030308
lipid transport	Gene Ontology	GO:0006869	11	142	0.113632	0.236401	NME4|STAR|ATP8A2|SCARB1|SIGMAR1|CHKA|STARD3|GOT2|APOL2|GRAMD1A|APOLD1	http://amigo.geneontology.org/amigo/term/GO:0006869
response to estradiol	Gene Ontology	GO:0032355	9	111	0.11679	0.241756	HSF1|STAT3|CTNNB1|GSTP1|SRD5A1|PPP1R9B|HNRNPD|PAM|OGG1	http://amigo.geneontology.org/amigo/term/GO:0032355
lipid metabolic process	Gene Ontology	GO:0006629	38	607	0.119176	0.244927	B4GALNT1|CYB5R1|MGLL|PRKAA1|PLCG2|FDXR|CHKA|CERS5|ASAH1|DDHD2|CHPT1|PRXL2B|LPCAT3|LPCAT1|SRD5A3|SRD5A1|APOL2|LSS|TAMM41|DAGLB|TBXAS1|ST3GAL4|ACSF2|PCYT2|PLA1A|HMGCR|ABHD3|IP6K2|PAFAH1B3|CYP2C9|PLA2G15|HACD4|LRP8|ACOX1|AGPAT3|AGPAT2|ELOVL1|STARD3	http://amigo.geneontology.org/amigo/term/GO:0006629
mitotic nuclear envelope reassembly	Gene Ontology	GO:0007084	5	51	0.119505	0.244927	SUMO1|CHMP3|VRK1|NUP85|RCC1	http://amigo.geneontology.org/amigo/term/GO:0007084
positive regulation of translation	Gene Ontology	GO:0045727	7	81	0.121715	0.245587	LARP6|CIRBP|RPL5|YTHDF1|UPF3A|FMR1|HNRNPD	http://amigo.geneontology.org/amigo/term/GO:0045727
regulation of gene silencing by miRNA	Gene Ontology	GO:0060964	7	81	0.121715	0.245587	NUP62|NUP54|EIF4G1|NUP85|PUM1|FMR1|POLR2H	http://amigo.geneontology.org/amigo/term/GO:0060964
cellular response to growth factor stimulus	Gene Ontology	GO:0071363	6	66	0.122087	0.245587	SHC1|LRP8|CTNNB1|AKT1|DTYMK|SRD5A1	http://amigo.geneontology.org/amigo/term/GO:0071363
protein-containing complex assembly	Gene Ontology	GO:0065003	10	128	0.1222	0.245587	MDN1|CD74|SPG7|AIMP2|EPB41|FANCC|IKBKG|DMTN|TEAD2|CAPG	http://amigo.geneontology.org/amigo/term/GO:0065003
protein phosphorylation	Gene Ontology	GO:0006468	38	610	0.125218	0.250435	MAPK12|COPS2|ADCK2|BIRC5|SCYL3|PRKAA1|AKT1|MLKL|IKBKE|TRIM28|TYK2|NEK11|NPRL2|CDK10|MASTL|CSNK1D|MAP3K4|RPS6KB2|STK25|AURKB|MARK3|MAPK8|IRAK1|CHEK2|IRAK4|STK36|VRK1|DMPK|VRK3|VRK2|BRD2|PPP1R9B|RPS6KC1|PRKACA|CDK6|PAK4|CTBP1|ILF3	http://amigo.geneontology.org/amigo/term/GO:0006468
negative regulation of I-kappaB kinase/NF-kappaB signaling	Gene Ontology	GO:0043124	5	52	0.126983	0.251483	TRIM39|TNIP1|TANK|GSTP1|STAT1	http://amigo.geneontology.org/amigo/term/GO:0043124
negative regulation of ERK1 and ERK2 cascade	Gene Ontology	GO:0070373	7	82	0.127564	0.251483	VRK3|PHB|SPRED3|C3orf33|GSTP1|TNIP1|ITGB1BP1	http://amigo.geneontology.org/amigo/term/GO:0070373
response to nutrient levels	Gene Ontology	GO:0031667	7	82	0.127564	0.251483	STAR|SIRT6|ASNS|GSTP1|ATG7|HMGCR|OPA1	http://amigo.geneontology.org/amigo/term/GO:0031667
cellular response to glucose stimulus	Gene Ontology	GO:0071333	6	67	0.12865	0.252422	PCK2|STAR|PRKAA1|PRKACA|SLC29A1|OPA1	http://amigo.geneontology.org/amigo/term/GO:0071333
neural tube closure	Gene Ontology	GO:0001843	7	83	0.133551	0.259818	FUZ|MKS1|PRKACA|OPA1|GLMN|TEAD2|BRD2	http://amigo.geneontology.org/amigo/term/GO:0001843
negative regulation of Wnt signaling pathway	Gene Ontology	GO:0030178	5	53	0.134668	0.259818	SHH|GRB10|NKD2|LZTS2|CHD8	http://amigo.geneontology.org/amigo/term/GO:0030178
rhythmic process	Gene Ontology	GO:0048511	11	147	0.135048	0.259818	HDAC3|ATG7|PRKAA1|DDX5|CSNK1D|CREM|MYBBP1A|DBP|MAPK8|HNRNPD|KDM5C	http://amigo.geneontology.org/amigo/term/GO:0048511
positive regulation of endothelial cell migration	Gene Ontology	GO:0010595	6	68	0.135379	0.259818	AKT1|SCARB1|ZNF580|GFUS|PDCD6|ITGB1BP1	http://amigo.geneontology.org/amigo/term/GO:0010595
ribosome biogenesis	Gene Ontology	GO:0042254	8	99	0.135886	0.259818	WDR43|FCF1|RPLP0|DROSHA|MYBBP1A|BUD23|NOL11|ERAL1	http://amigo.geneontology.org/amigo/term/GO:0042254
membrane organization	Gene Ontology	GO:0061024	10	131	0.136185	0.259818	CTTN|SLC2A8|ITSN1|CHP1|DNM2|EPN1|BAIAP2L2|ARPC4|UBC|TRIP10	http://amigo.geneontology.org/amigo/term/GO:0061024
double-strand break repair via nonhomologous end joining	Gene Ontology	GO:0006303	6	69	0.14227	0.26705	SUMO1|MDC1|SMARCAL1|POLM|NSD2|NHEJ1	http://amigo.geneontology.org/amigo/term/GO:0006303
cellular response to cAMP	Gene Ontology	GO:0071320	5	54	0.142556	0.26705	APEX1|KDM1A|SRD5A1|STAR|DMTN	http://amigo.geneontology.org/amigo/term/GO:0071320
stem cell population maintenance	Gene Ontology	GO:0019827	5	54	0.142556	0.26705	CTNNB1|DIS3L2|STAT3|LSM1|PHF19	http://amigo.geneontology.org/amigo/term/GO:0019827
embryonic digit morphogenesis	Gene Ontology	GO:0042733	5	54	0.142556	0.26705	SHH|MKS1|C2CD3|TMEM107|CTNNB1	http://amigo.geneontology.org/amigo/term/GO:0042733
double-strand break repair via homologous recombination	Gene Ontology	GO:0000724	7	85	0.145933	0.271574	SPIDR|FAN1|RAD51AP1|ZSWIM7|NABP2|FBH1|MCM9	http://amigo.geneontology.org/amigo/term/GO:0000724
response to virus	Gene Ontology	GO:0009615	9	117	0.147086	0.271574	ACTA2|IFITM1|IRF7|HMGA1|OAS1|ENO1|IKBKG|CDK6|IFIT3	http://amigo.geneontology.org/amigo/term/GO:0009615
double-strand break repair	Gene Ontology	GO:0006302	8	101	0.147248	0.271574	SUMO1|MDC1|PARP3|MAPK8|NSD2|CHEK2|TDP1|NHEJ1	http://amigo.geneontology.org/amigo/term/GO:0006302
vesicle-mediated transport	Gene Ontology	GO:0016192	19	285	0.147595	0.271574	BCAP31|STX8|BCAP29|SEC22C|TSNARE1|TRAPPC3|STX2|FUZ|TRAPPC4|MON1A|STX11|TRAPPC12|HPS1|SFT2D1|RABEP1|USO1|TVP23C|STX3|SEC31A	http://amigo.geneontology.org/amigo/term/GO:0016192
cellular response to UV	Gene Ontology	GO:0034644	5	55	0.150638	0.274732	FMR1|PTPRK|TMEM161A|AURKB|KDM1A	http://amigo.geneontology.org/amigo/term/GO:0034644
negative regulation of gene expression, epigenetic	Gene Ontology	GO:0045814	5	55	0.150638	0.274732	PPHLN1|PHF1|PHF19|TASOR|AEBP2	http://amigo.geneontology.org/amigo/term/GO:0045814
phospholipid metabolic process	Gene Ontology	GO:0006644	6	71	0.156523	0.284213	PLA2G15|TAZ|LPCAT3|LPCAT1|PIP4K2A|AGPAT2	http://amigo.geneontology.org/amigo/term/GO:0006644
liver development	Gene Ontology	GO:0001889	7	87	0.158837	0.285065	HRAS|ASNS|FPGS|DBP|SRD5A1|HNRNPD|PKD1	http://amigo.geneontology.org/amigo/term/GO:0001889
protein import into nucleus	Gene Ontology	GO:0006606	7	87	0.158837	0.285065	NUTF2|STAT3|PHB2|NUP85|AKT1|NUP62|IPO4	http://amigo.geneontology.org/amigo/term/GO:0006606
chromatin remodeling	Gene Ontology	GO:0006338	8	103	0.159058	0.285065	SMARCC2|HDAC5|PIH1D1|SCMH1|NPM2|INO80B|INO80C|KDM5C	http://amigo.geneontology.org/amigo/term/GO:0006338
apoptotic signaling pathway	Gene Ontology	GO:0097190	6	72	0.163875	0.291118	TM2D1|SHH|DAP3|IFI27L1|PDCD6|PAWR	http://amigo.geneontology.org/amigo/term/GO:0097190
positive regulation of protein binding	Gene Ontology	GO:0032092	6	72	0.163875	0.291118	PKD1|TCF7L2|EPB41|AKTIP|MARK3|USP33	http://amigo.geneontology.org/amigo/term/GO:0032092
cellular response to oxidative stress	Gene Ontology	GO:0034599	8	104	0.165125	0.291118	STX2|VRK2|ATP13A2|TMEM161A|PRKAA1|GSTP1|FANCC|TXNRD1	http://amigo.geneontology.org/amigo/term/GO:0034599
endoplasmic reticulum to Golgi vesicle-mediated transport	Gene Ontology	GO:0006888	13	187	0.165264	0.291118	BCAP31|SERPINA1|SEC22C|HYOU1|TRAPPC3|BCAP29|TRAPPC4|PDCD6|USO1|LMAN2|TRAPPC12|DCTN2|SEC31A	http://amigo.geneontology.org/amigo/term/GO:0006888
regulation of catalytic activity	Gene Ontology	GO:0050790	18	273	0.166265	0.291118	SIL1|RIC8A|RCC1|EEF1D|PLEKHG4|ARHGEF9|ITSN1|WDR41|EIF2B4|RABGEF1|HPS1|DMPK|CCDC88C|LAMTOR4|EPS8L1|CYTH2|RANBP1|MON1A	http://amigo.geneontology.org/amigo/term/GO:0050790
response to hydrogen peroxide	Gene Ontology	GO:0042542	5	57	0.167358	0.291118	PRKAA1|STK25|STAR|LDHA|STAT1	http://amigo.geneontology.org/amigo/term/GO:0042542
positive regulation of protein localization to plasma membrane	Gene Ontology	GO:1903078	5	57	0.167358	0.291118	AKT1|NKD2|PPP1R9B|ZDHHC5|STX3	http://amigo.geneontology.org/amigo/term/GO:1903078
cellular protein modification process	Gene Ontology	GO:0006464	8	105	0.171297	0.295616	LCMT1|TSG101|MANBA|TTLL5|UBE2D3|SAE1|NTAQ1|TTLL11	http://amigo.geneontology.org/amigo/term/GO:0006464
fatty acid biosynthetic process	Gene Ontology	GO:0006633	6	73	0.171372	0.295616	HACD4|MGLL|PRKAA1|PRXL2B|ELOVL1|TBXAS1	http://amigo.geneontology.org/amigo/term/GO:0006633
oxidation-reduction process	Gene Ontology	GO:0055114	29	469	0.172634	0.296559	KDM1A|CYB5R1|PAOX|P4HA2|PPOX|FDXR|PAM|MTHFD2L|IDH3B|OGFOD2|PRXL2B|SRD5A1|LDHA|LDHC|TBXAS1|TP53I3|HMGCR|CYP2R1|BDH1|CYP2C9|COQ6|ADH5|ACOX1|DHRS4L2|MTRR|ALKBH6|CTBP1|TXNRD1|DUS4L	http://amigo.geneontology.org/amigo/term/GO:0055114
blood vessel development	Gene Ontology	GO:0001568	5	58	0.17598	0.301057	CEACAM1|STRA6|PKD1|ITGAV|TCF7L2	http://amigo.geneontology.org/amigo/term/GO:0001568
microtubule cytoskeleton organization	Gene Ontology	GO:0000226	10	139	0.17733	0.301289	KNSTRN|TTLL5|EML2|BIRC5|MARK3|TUBB|TTLL11|NDEL1|PRC1|TUBB2A	http://amigo.geneontology.org/amigo/term/GO:0000226
cholesterol metabolic process	Gene Ontology	GO:0008203	8	106	0.177571	0.301289	CYP2C9|STAR|PRKAA1|CES1|HMGCR|FDXR|STARD3|APOL2	http://amigo.geneontology.org/amigo/term/GO:0008203
regulation of cell growth	Gene Ontology	GO:0001558	6	74	0.179007	0.302486	TSG101|KAZALD1|CEACAM1|CHPT1|PAK4|CRIM1	http://amigo.geneontology.org/amigo/term/GO:0001558
positive regulation of gene expression	Gene Ontology	GO:0010628	31	509	0.184474	0.310456	CD74|HSF1|STAR|HRAS|RPL5|PRKAA1|CTNNB1|PLCG2|RPS3|DROSHA|STAT3|MBIP|ATP13A2|RPL23|ACTA2|MAPK8|HNRNPD|CDKN2A|CD46|ZNF580|LGALS9|IL32|SHH|PAWR|GATA2|UBR5|AKT1|PHB|MAZ|TERF2|AGO3	http://amigo.geneontology.org/amigo/term/GO:0010628
negative regulation of gene expression	Gene Ontology	GO:0010629	20	314	0.188577	0.316077	HSF1|CTNNB1|INPPL1|LGMN|RNASEH2B|HNRNPD|HRAS|CD46|PRKAA1|SLC35C2|TERF2|AKT1|LGALS9|RUNX1|MYADM|SHH|PAWR|GATA2|MECP2|AGO3	http://amigo.geneontology.org/amigo/term/GO:0010629
rRNA processing	Gene Ontology	GO:0006364	14	210	0.192135	0.320741	MDN1|CDKN2A|RPL23A|RPLP0|RPS19|RPL5|RPL23|PIH1D1|RPL13A|WDR43|BUD23|EXOSC1|NOL11|FCF1	http://amigo.geneontology.org/amigo/term/GO:0006364
response to toxic substance	Gene Ontology	GO:0009636	7	92	0.193215	0.320785	STAR|ASNS|PON3|CES1|GSTP1|CHKA|KDM5C	http://amigo.geneontology.org/amigo/term/GO:0009636
glucose metabolic process	Gene Ontology	GO:0006006	5	60	0.19371	0.320785	OAS1|AKT1|INPPL1|PRKAA1|CREM	http://amigo.geneontology.org/amigo/term/GO:0006006
cilium assembly	Gene Ontology	GO:0060271	15	229	0.199641	0.329255	C2CD3|IFT43|CCDC66|EXOC7|GALNT11|PKD1|TCTN1|FUZ|CEP131|MKS1|EXOC1|EXOC2|STK36|MACIR|TMEM107	http://amigo.geneontology.org/amigo/term/GO:0060271
phosphatidylinositol biosynthetic process	Gene Ontology	GO:0006661	6	77	0.202697	0.329255	PI4KB|INPPL1|RUFY1|PLEKHA4|PLCG2|PIP4K2A	http://amigo.geneontology.org/amigo/term/GO:0006661
response to peptide hormone	Gene Ontology	GO:0043434	5	61	0.202802	0.329255	STAT3|EIF2B4|STAR|IRS1|STAT1	http://amigo.geneontology.org/amigo/term/GO:0043434
positive regulation of interleukin-1 beta production	Gene Ontology	GO:0032731	5	61	0.202802	0.329255	NLRP1|LGALS9|STAT3|IFI16|NLRP2	http://amigo.geneontology.org/amigo/term/GO:0032731
response to mechanical stimulus	Gene Ontology	GO:0009612	5	61	0.202802	0.329255	MAPK8|SUN1|MEIS2|STAT1|ASNS	http://amigo.geneontology.org/amigo/term/GO:0009612
cerebral cortex development	Gene Ontology	GO:0021987	6	78	0.210836	0.340961	KDM1A|TMEM14B|MDK|LRP8|SRD5A1|PPP1R9B	http://amigo.geneontology.org/amigo/term/GO:0021987
cellular response to hypoxia	Gene Ontology	GO:0071456	9	129	0.217838	0.350914	HP1BP3|HYOU1|PHB2|P4HB|PRKAA1|AKT1|SLC29A1|OPA1|IRAK1	http://amigo.geneontology.org/amigo/term/GO:0071456
positive regulation of transcription by RNA polymerase II	Gene Ontology	GO:0045944	65	1149	0.220099	0.353182	HSF1|KDM1A|HDAC3|ETV1|HDAC5|HSF4|JUP|HRAS|ZNF219|ETV6|CTNNB1|AKT1|IKBKG|GTF2A2|TEAD2|BCL9L|ZNF780B|ITGB1BP1|ZNF814|GPS2|ZNF384|STAT3|STAT1|ASXL1|CHD8|MEIS2|ZFP64|APEX1|IFI16|GRIN1|GTF2I|TCF20|ZSCAN21|KMT2C|IRF3|RFXANK|CDKN2A|SIRT7|ZNF226|MED25|RHOQ|MLLT10|HMGA1|ZNF580|TNIP1|USP16|SMYD3|SHH|GATA2|NLRC5|ZNF639|THAP3|IRF7|CNBP|HNRNPD|PKD1|LITAF|TCF7L2|DMTF1|ZNF544|RUNX1|CREM|UBC|DBP|MECP2	http://amigo.geneontology.org/amigo/term/GO:0045944
negative regulation of G1/S transition of mitotic cell cycle	Gene Ontology	GO:2000134	5	63	0.221395	0.35389	FHL1|CDKN2A|CDK2AP2|CDK6|FBXO7	http://amigo.geneontology.org/amigo/term/GO:2000134
response to drug	Gene Ontology	GO:0042493	19	306	0.227131	0.361663	MDK|STAT3|STAT1|RPP21|CTNNB1|LRP8|PRKAA1|PAM|APEX1|PPOX|STAR|MCM7|AGPAT2|HDAC5|TRAF3IP2|SRD5A1|PPP1R9B|LDHA|OGG1	http://amigo.geneontology.org/amigo/term/GO:0042493
antigen processing and presentation of exogenous peptide antigen via MHC class II	Gene Ontology	GO:0019886	7	97	0.230252	0.363438	CD74|LGMN|DNM2|DCTN2|KLC1|KLC2|SEC31A	http://amigo.geneontology.org/amigo/term/GO:0019886
vasculogenesis	Gene Ontology	GO:0001570	5	64	0.230879	0.363438	CTNNB1|GLMN|SHH|ITGAV|TEAD2	http://amigo.geneontology.org/amigo/term/GO:0001570
positive regulation of autophagy	Gene Ontology	GO:0010508	5	64	0.230879	0.363438	TMEM59|TRIM5|ATG7|PRKAA1|NPRL2	http://amigo.geneontology.org/amigo/term/GO:0010508
protein dephosphorylation	Gene Ontology	GO:0006470	12	184	0.236741	0.371253	SDHAF2|CTDNEP1|PPP1CA|STYXL1|PPP4C|DUSP28|SSH2|PPA2|PTP4A2|TIMM50|PTPRK|PPP4R3B	http://amigo.geneontology.org/amigo/term/GO:0006470
pre-replicative complex assembly	Gene Ontology	GO:0036388	5	65	0.240478	0.374278	MCM7|PSMC2|ORC5|ORC3|UBC	http://amigo.geneontology.org/amigo/term/GO:0036388
I-kappaB kinase/NF-kappaB signaling	Gene Ontology	GO:0007249	5	65	0.240478	0.374278	AKT1|RNF31|TANK|IKBKG|UBC	http://amigo.geneontology.org/amigo/term/GO:0007249
response to organic cyclic compound	Gene Ontology	GO:0014070	9	133	0.243961	0.378276	HSF1|KDM1A|STAT3|TAF2|STAT1|STAR|SRD5A1|PPP1R9B|LDHA	http://amigo.geneontology.org/amigo/term/GO:0014070
intracellular signal transduction	Gene Ontology	GO:0035556	27	456	0.2474	0.382178	GMIP|PRKAA1|AKT1|MAPK12|NLRC5|TYK2|ITGB1BP1|NEK11|DGKZ|ITSN1|STYXL1|DEF8|MASTL|MAP3K4|DMPK|MARK3|TRAF3IP2|MAPK8|IRAK1|S100A1|IRAK4|SHC1|SOCS7|SH2B1|TUFT1|ADCY6|PLCG2	http://amigo.geneontology.org/amigo/term/GO:0035556
response to unfolded protein	Gene Ontology	GO:0006986	5	68	0.269873	0.412278	JKAMP|DERL2|FAF2|SERPINH1|UBE2J2	http://amigo.geneontology.org/amigo/term/GO:0006986
cellular response to drug	Gene Ontology	GO:0035690	5	68	0.269873	0.412278	HSF1|CHEK2|PPP1R9B|RANBP1|PRKAA1	http://amigo.geneontology.org/amigo/term/GO:0035690
gene silencing by RNA	Gene Ontology	GO:0031047	5	68	0.269873	0.412278	FMR1|CNOT2|CNOT1|DROSHA|AGO3	http://amigo.geneontology.org/amigo/term/GO:0031047
regulation of small GTPase mediated signal transduction	Gene Ontology	GO:0051056	9	137	0.271093	0.412293	ARHGEF9|RALGAPB|RHOQ|OPHN1|SRGAP2|ITSN1|ARHGAP26|GMIP|TRIP10	http://amigo.geneontology.org/amigo/term/GO:0051056
regulation of cell cycle	Gene Ontology	GO:0051726	10	155	0.27379	0.412293	PUM1|STAT3|PRCC|LIN37|MASTL|YY1AP1|USP16|CDK6|CTBP1|BIRC5	http://amigo.geneontology.org/amigo/term/GO:0051726
neuron projection development	Gene Ontology	GO:0031175	9	138	0.278014	0.412293	WDR5|ATP8A2|STX3|L1CAM|OPHN1|NDEL1|PPP1R9B|PTPRK|MECP2	http://amigo.geneontology.org/amigo/term/GO:0031175
intracellular receptor signaling pathway	Gene Ontology	GO:0030522	6	86	0.279498	0.412293	KDM1A|HDAC3|STAT3|GPS2|NR2C1|AGO3	http://amigo.geneontology.org/amigo/term/GO:0030522
ephrin receptor signaling pathway	Gene Ontology	GO:0048013	6	86	0.279498	0.412293	EFNB2|ITSN1|HRAS|ARPC4|DNM1|GRIN1	http://amigo.geneontology.org/amigo/term/GO:0048013
anaphase-promoting complex-dependent catabolic process	Gene Ontology	GO:0031145	6	86	0.279498	0.412293	ANAPC15|AURKB|UBC|PSMC2|ANAPC5|ANAPC7	http://amigo.geneontology.org/amigo/term/GO:0031145
negative regulation of transforming growth factor beta receptor signaling pathway	Gene Ontology	GO:0030512	6	86	0.279498	0.412293	SMAD6|UBC|SPRED3|DNM2|BCL9L|SNX25	http://amigo.geneontology.org/amigo/term/GO:0030512
snRNA transcription by RNA polymerase II	Gene Ontology	GO:0042795	5	69	0.279841	0.412293	INTS12|NABP2|POLR2H|GTF2A2|INTS14	http://amigo.geneontology.org/amigo/term/GO:0042795
canonical Wnt signaling pathway	Gene Ontology	GO:0060070	5	69	0.279841	0.412293	SHH|CTNNB1|PORCN|TCF7L2|BCL9L	http://amigo.geneontology.org/amigo/term/GO:0060070
hemopoiesis	Gene Ontology	GO:0030097	5	69	0.279841	0.412293	ASXL1|CTNNB1|RUNX1|GATA2|TAZ	http://amigo.geneontology.org/amigo/term/GO:0030097
regulation of transcription, DNA-templated	Gene Ontology	GO:0006355	78	1422	0.282114	0.414167	RNF14|HSF1|ZNF195|HP1BP3|HSF4|KDM1A|ZNF250|SMAD6|AEBP2|ZNF219|PHF19|CNBP|ITGB3BP|ZNF35|ZNF749|ZNF490|TEAD2|ZNF780B|ELF2|OGG1|ZNF814|MLF1|ZNF7|RUNX1|STAT3|ZNF3|STAT1|SUB1|ASXL1|DMTF1|SOX13|DNM2|MEIS2|ZNF8|ZNF783|ZNF517|ZNF573|ZNF431|MED15|CNOT2|GTF2I|HNRNPD|ZSCAN21|YAF2|KMT2C|IRF3|PFDN5|ZNF226|DBP|ZNF680|MYBBP1A|GTF2IRD1|HMGA1|NR2C1|SCMH1|SHH|ZNF880|CHEK2|GATA2|ETV1|IRF7|ZSCAN25|LRRFIP2|ETV6|ZNF76…	http://amigo.geneontology.org/amigo/term/GO:0006355
negative regulation of DNA-binding transcription factor activity	Gene Ontology	GO:0043433	6	87	0.288436	0.421091	KDM1A|SUMO1|TCF7L2|PHB2|ZNF431|SP100	http://amigo.geneontology.org/amigo/term/GO:0043433
response to ethanol	Gene Ontology	GO:0045471	8	122	0.28952	0.421091	STAR|TBXAS1|GSTP1|HMGCR|GOT2|STAT3|GRIN1|OGG1	http://amigo.geneontology.org/amigo/term/GO:0045471
regulation of megakaryocyte differentiation	Gene Ontology	GO:0045652	5	70	0.289882	0.421091	KMT2C|WDR5|RUNX1|RBBP5|AGO3	http://amigo.geneontology.org/amigo/term/GO:0045652
lipid catabolic process	Gene Ontology	GO:0016042	8	123	0.297077	0.430034	PLA2G15|DAGLB|DDHD2|MGLL|PLA1A|CES1|PLCG2|PAFAH1B3	http://amigo.geneontology.org/amigo/term/GO:0016042
activation of MAPK activity	Gene Ontology	GO:0000187	8	124	0.304678	0.439501	CD74|SHC1|IKBKE|PRKAA1|IGFBP6|IKBKG|UBC|IRAK1	http://amigo.geneontology.org/amigo/term/GO:0000187
response to endoplasmic reticulum stress	Gene Ontology	GO:0034976	6	89	0.306483	0.44057	BCAP31|OS9|TMEM259|HYOU1|P4HB|USP19	http://amigo.geneontology.org/amigo/term/GO:0034976
cellular response to hydrogen peroxide	Gene Ontology	GO:0070301	5	72	0.310142	0.444286	APEX1|ZNF580|HSF1|RPS3|PRKAA1	http://amigo.geneontology.org/amigo/term/GO:0070301
regulation of inflammatory response	Gene Ontology	GO:0050727	6	91	0.32472	0.463566	IRF3|DROSHA|NLRP1|MGLL|TNIP1|DAGLB	http://amigo.geneontology.org/amigo/term/GO:0050727
muscle contraction	Gene Ontology	GO:0006936	7	109	0.326889	0.465059	ACTA2|TNNT1|ITGB5|CHRNB1|TAZ|MYL6|PXN	http://amigo.geneontology.org/amigo/term/GO:0006936
Ras protein signal transduction	Gene Ontology	GO:0007265	5	74	0.330588	0.465521	RFXANK|CDKN2A|TRIM28|SHC1|HRAS	http://amigo.geneontology.org/amigo/term/GO:0007265
regulation of autophagy	Gene Ontology	GO:0010506	5	74	0.330588	0.465521	WDR41|IFI16|USP33|PIP4K2A|MFSD8	http://amigo.geneontology.org/amigo/term/GO:0010506
response to glucose	Gene Ontology	GO:0009749	5	74	0.330588	0.465521	LDHA|EIF2B4|ATG7|TCF7L2|SELENOT	http://amigo.geneontology.org/amigo/term/GO:0009749
negative regulation of NF-kappaB transcription factor activity	Gene Ontology	GO:0032088	6	92	0.333895	0.468585	CDKN2A|NLRP2|CHP1|SIVA1|NLRC5|IRAK1	http://amigo.geneontology.org/amigo/term/GO:0032088
glucose homeostasis	Gene Ontology	GO:0042593	7	110	0.335265	0.468918	STAT3|IRS1|PRKAA1|SELENOT|OAS1|AKT1|TCF7L2	http://amigo.geneontology.org/amigo/term/GO:0042593
antigen processing and presentation of exogenous peptide antigen via MHC class I, TAP-dependent	Gene Ontology	GO:0002479	5	75	0.34086	0.473543	PSMC2|ITGB5|IKBKG|ITGAV|SNAP23	http://amigo.geneontology.org/amigo/term/GO:0002479
positive regulation of protein ubiquitination	Gene Ontology	GO:0031398	5	75	0.34086	0.473543	AIMP2|CHFR|HDAC3|FBXO4|FANCI	http://amigo.geneontology.org/amigo/term/GO:0031398
stimulatory C-type lectin receptor signaling pathway	Gene Ontology	GO:0002223	7	112	0.352101	0.487525	HRAS|MUC4|PLCG2|PRKACA|IKBKG|MUC5B|PSMC2	http://amigo.geneontology.org/amigo/term/GO:0002223
negative regulation of endopeptidase activity	Gene Ontology	GO:0010951	9	149	0.356803	0.492388	SERPINA1|ANXA2|PAPLN|BIRC5|AKT1|WFDC3|CRIM1|SERPINH1|SERPINB6	http://amigo.geneontology.org/amigo/term/GO:0010951
determination of left/right symmetry	Gene Ontology	GO:0007368	5	77	0.361464	0.495517	DISP1|MKS1|SHH|TMEM107|GALNT11	http://amigo.geneontology.org/amigo/term/GO:0007368
phagocytosis	Gene Ontology	GO:0006909	5	77	0.361464	0.495517	C1orf43|GATA2|CDC42SE1|P2RY6|DNM2	http://amigo.geneontology.org/amigo/term/GO:0006909
cellular response to interferon-gamma	Gene Ontology	GO:0071346	6	96	0.370838	0.506195	STX8|STAR|STAT1|RPL13A|LGALS9|CCL26	http://amigo.geneontology.org/amigo/term/GO:0071346
dephosphorylation	Gene Ontology	GO:0016311	11	188	0.371699	0.506195	CTDNEP1|PPP1CA|PRUNE1|NT5E|HDDC2|NT5C3B|DUSP28|SSH2|PON3|PTP4A2|PTPRK	http://amigo.geneontology.org/amigo/term/GO:0016311
mitotic cell cycle	Gene Ontology	GO:0000278	9	152	0.378844	0.510427	NUP62|MASTL|TUBB|IK|USP16|CHFR|CENPT|TUBB2A|DIS3L2	http://amigo.geneontology.org/amigo/term/GO:0000278
positive regulation of cold-induced thermogenesis	Gene Ontology	GO:0120162	6	97	0.380108	0.510427	EHMT1|KDM1A|HDAC3|SIRT6|HSF1|GRB10	http://amigo.geneontology.org/amigo/term/GO:0120162
regulation of apoptotic process	Gene Ontology	GO:0042981	15	264	0.380285	0.510427	IRF3|CTNNB1|BIRC5|NLRP1|STAT1|PHB|LRP8|LCMT1|TP53I3|APEX1|AKT1|RPS3|SRA1|CARD6|NOL3	http://amigo.geneontology.org/amigo/term/GO:0042981
modulation of chemical synaptic transmission	Gene Ontology	GO:0050804	5	79	0.382098	0.510427	STAT3|DNM1|PPP1R9B|PRKACA|LRP8	http://amigo.geneontology.org/amigo/term/GO:0050804
response to nutrient	Gene Ontology	GO:0007584	5	79	0.382098	0.510427	HSF1|STAT1|STAR|LDHA|HMGCR	http://amigo.geneontology.org/amigo/term/GO:0007584
protein folding	Gene Ontology	GO:0006457	10	171	0.382204	0.510427	NUDCD2|SIL1|PFDN5|CLPX|P4HB|MPDU1|PPIG|ALG12|FKBP9|DNAJC19	http://amigo.geneontology.org/amigo/term/GO:0006457
metabolic process	Gene Ontology	GO:0008152	11	190	0.384888	0.512359	MTHFD2L|MANBA|HEXA|DCTD|MAN2A2|HEXD|MAN1B1|GFUS|PAM|OGG1|BDH1	http://amigo.geneontology.org/amigo/term/GO:0008152
cellular response to amino acid starvation	Gene Ontology	GO:0034198	5	80	0.392408	0.518458	LAMTOR4|MAPK8|ATP6V1F|ATP6V1E1|NPRL2	http://amigo.geneontology.org/amigo/term/GO:0034198
microtubule-based movement	Gene Ontology	GO:0007018	5	80	0.392408	0.518458	KLC1|KLC2|DYNLRB1|KIFC3|KTN1	http://amigo.geneontology.org/amigo/term/GO:0007018
small GTPase mediated signal transduction	Gene Ontology	GO:0007264	7	117	0.394479	0.518458	RRAD|RUFY1|HRAS|CCDC88C|CHP1|USO1|RHOQ	http://amigo.geneontology.org/amigo/term/GO:0007264
Golgi organization	Gene Ontology	GO:0007030	7	117	0.394479	0.518458	TRAPPC12|CSNK1D|USO1|TANGO2|LMAN2|KIFC3|TJAP1	http://amigo.geneontology.org/amigo/term/GO:0007030
cholesterol homeostasis	Gene Ontology	GO:0042632	6	99	0.398649	0.519376	RALY|SCARB1|ACOX1|CES1|CNBP|HMGCR	http://amigo.geneontology.org/amigo/term/GO:0042632
integrin-mediated signaling pathway	Gene Ontology	GO:0007229	6	99	0.398649	0.519376	LAMA3|ITGB5|ITGAV|CEACAM1|ADAM15|ITGB1BP1	http://amigo.geneontology.org/amigo/term/GO:0007229
positive regulation of cell population proliferation	Gene Ontology	GO:0008284	30	552	0.399401	0.519376	HSF1|EFNB2|MAZ|HSF4|HRAS|PRKAA1|CTNNB1|AKT1|PRC1|ITGB1BP1|STAT3|STAT1|NAP1L1|MEIS2|RPL23|DERL2|TRPM4|BIRC5|DHPS|SHC1|MECP2|HMGCR|SHH|SHMT2|LGMN|CNBP|STX3|CEP131|IRS1|ITGAV	http://amigo.geneontology.org/amigo/term/GO:0008284
transcription initiation from RNA polymerase II promoter	Gene Ontology	GO:0006367	9	155	0.400982	0.519376	HDAC3|HDAC5|TAF2|MAZ|NR2C1|GTF2A2|TEAD2|HDAC10|POLR2H	http://amigo.geneontology.org/amigo/term/GO:0006367
cellular oxidant detoxification	Gene Ontology	GO:0098869	5	81	0.402705	0.519376	TXNDC17|TXNRD1|PRXL2B|GSTP1|SELENOT	http://amigo.geneontology.org/amigo/term/GO:0098869
B cell differentiation	Gene Ontology	GO:0030183	5	81	0.402705	0.519376	PLCG2|GPS2|YY1AP1|HDAC5|NHEJ1	http://amigo.geneontology.org/amigo/term/GO:0030183
post-translational protein modification	Gene Ontology	GO:0043687	19	344	0.404344	0.519871	SUMF2|SERPINA1|WDR5|KLHL20|MFGE8|FBXO44|COPS2|COPS3|P4HB|PTP4A2|RBBP5|VWA1|FBXO4|ELOC|KTN1|FBXO7|PSMC2|COPS7B|MELTF	http://amigo.geneontology.org/amigo/term/GO:0043687
regulation of mitotic cell cycle phase transition	Gene Ontology	GO:1901990	5	82	0.412981	0.529331	ANAPC15|PSMC2|ANAPC5|NEK11|ANAPC7	http://amigo.geneontology.org/amigo/term/GO:1901990
calcium-mediated signaling	Gene Ontology	GO:0019722	5	83	0.423229	0.539248	TRPM4|PLCG2|GRIN1|PPP1R9B|MCTP1	http://amigo.geneontology.org/amigo/term/GO:0019722
protein autophosphorylation	Gene Ontology	GO:0046777	10	177	0.424035	0.539248	VRK1|VRK2|ATP13A2|AKT1|STK25|PRKACA|AURKB|TRIM28|IRAK1|CHEK2	http://amigo.geneontology.org/amigo/term/GO:0046777
fatty acid metabolic process	Gene Ontology	GO:0006631	11	196	0.424625	0.539248	PLA2G15|HACD4|ACSF2|ACOX1|MGLL|PRKAA1|PRXL2B|CREM|ELOVL1|ASAH1|TBXAS1	http://amigo.geneontology.org/amigo/term/GO:0006631
collagen fibril organization	Gene Ontology	GO:0030199	6	102	0.426394	0.539838	ANXA2|P4HB|P4HA2|COL4A6|LAMA3|SERPINH1	http://amigo.geneontology.org/amigo/term/GO:0030199
cell-cell adhesion	Gene Ontology	GO:0098609	10	178	0.431009	0.544018	ANXA2|SHC1|PPP1CA|CD44|PKD1|CTNNB1|JUP|LAMA3|CTNND1|PAK4	http://amigo.geneontology.org/amigo/term/GO:0098609
regulation of transcription by RNA polymerase II	Gene Ontology	GO:0006357	86	1641	0.434996	0.547381	RNF14|HSF1|HSF4|PAM|ZNF384|ZNF783|ZNF573|ZNF576|ZSCAN25|HDGF|DMTF1|DDX5|ZNF680|SMARCAL1|NR2C1|BRD9|GATA2|BRD2|ZNF444|MAZ|TCF7L2|ZGPAT|RUNX1|ZNF778|DBP|ELP2|LITAF|HMGN1|MED4|ZSCAN2|CHD4|SUB1|SOX13|MEIS2|CAMTA1|GTF2I|ZNF761|ZNF517|ZNF226|ZNF581|ZNF580|ZNF142|ZNF611|IRF7|ETV6|ZNF562|CREM|KDM1A|RCOR3|ZNF35|ELOC|MXD4|IRF3|STAT3|PGBD1|ZNF749|TCF20|ETV1|SMARCC2|MECP2|HTATSF1|ZNF639|ZNF880|ZSCAN21|ZNF250…	http://amigo.geneontology.org/amigo/term/GO:0006357
chemotaxis	Gene Ontology	GO:0006935	9	160	0.437897	0.549362	TYMP|HRAS|PLGRKT|NUP85|ZNF580|LGALS9|L1CAM|CKLF|CCL26	http://amigo.geneontology.org/amigo/term/GO:0006935
brain development	Gene Ontology	GO:0007420	15	276	0.447686	0.559353	C2CD3|STAR|CTNND1|ITSN1|CHD8|MECP2|CTNS|MEIS2|FPGS|UGP2|STK36|JHY|GRIN1|HNRNPD|PAFAH1B3	http://amigo.geneontology.org/amigo/term/GO:0007420
angiogenesis	Gene Ontology	GO:0001525	14	257	0.448564	0.559353	EFNB2|ANXA2|SHC1|MFGE8|ITGB1BP1|C1GALT1|ITGAV|CEACAM1|PDCD6|TYMP|ADAM15|SHH|TNFRSF12A|APOLD1	http://amigo.geneontology.org/amigo/term/GO:0001525
tumor necrosis factor-mediated signaling pathway	Gene Ontology	GO:0033209	7	125	0.462098	0.573971	STAT1|TXNDC17|TRAF3IP2|CDIP1|KRT8|TNFRSF12A|PSMC2	http://amigo.geneontology.org/amigo/term/GO:0033209
transforming growth factor beta receptor signaling pathway	Gene Ontology	GO:0007179	6	106	0.463059	0.573971	ITGB5|SMAD6|ZFYVE9|PXN|UBC|PTPRK	http://amigo.geneontology.org/amigo/term/GO:0007179
steroid metabolic process	Gene Ontology	GO:0008202	7	127	0.478783	0.59169	CYP2C9|CYB5R1|PRKAA1|HMGCR|FDXR|STARD3|SRD5A1	http://amigo.geneontology.org/amigo/term/GO:0008202
neuron migration	Gene Ontology	GO:0001764	6	108	0.481172	0.592872	PEX5|TUBB2A|CTNNB1|NDEL1|PEX13|GATA2	http://amigo.geneontology.org/amigo/term/GO:0001764
transcription by RNA polymerase II	Gene Ontology	GO:0006366	10	186	0.486438	0.597583	ETV1|STAT3|TAF2|COPS2|GTF2IRD1|MED4|ELOC|GTF2A2|GTF2I|POLR2H	http://amigo.geneontology.org/amigo/term/GO:0006366
positive regulation of protein phosphorylation	Gene Ontology	GO:0001934	11	206	0.490528	0.600825	CD74|HDAC3|ANXA2|AKTIP|HRAS|PRR5|AKT1|CSNK1D|FMR1|CHEK2|FBH1	http://amigo.geneontology.org/amigo/term/GO:0001934
osteoblast differentiation	Gene Ontology	GO:0001649	6	111	0.507977	0.620361	SIRT7|PHB|BCAP29|AKT1|MYBBP1A|PSMC2	http://amigo.geneontology.org/amigo/term/GO:0001649
proteasome-mediated ubiquitin-dependent protein catabolic process	Gene Ontology	GO:0043161	10	190	0.51371	0.625517	KLHL20|SPOP|FAF2|UBE2D3|CTNNB1|PCBP2|ARMC8|PSMC2|ZSWIM8|UBXN11	http://amigo.geneontology.org/amigo/term/GO:0043161
nucleosome assembly	Gene Ontology	GO:0006334	6	112	0.5168	0.627435	NASP|HP1BP3|NAP1L1|H2BC5|SMYD3|BRD2	http://amigo.geneontology.org/amigo/term/GO:0006334
protein deubiquitination	Gene Ontology	GO:0016579	14	271	0.529202	0.640613	USP33|ASXL1|USP54|SUDS3|USP39|TNIP1|USP16|IKBKG|UBC|USP32|USP19|INO80B|INO80C|PSMC2	http://amigo.geneontology.org/amigo/term/GO:0016579
T cell receptor signaling pathway	Gene Ontology	GO:0050852	9	173	0.532011	0.64091	BTN3A3|CACNB3|HRAS|NFKBIZ|PLCG2|IKBKG|PSMC2|EIF2B4|RNF31	http://amigo.geneontology.org/amigo/term/GO:0050852
cytokine-mediated signaling pathway	Gene Ontology	GO:0019221	16	311	0.532875	0.64091	STAT3|STAT1|INPPL1|TRAF3IP2|LRP8|STX3|AKT1|GRB10|IL32|UBC|PRKACA|TYK2|IRAK1|BIRC5|IRAK4|SHC1	http://amigo.geneontology.org/amigo/term/GO:0019221
activation of GTPase activity	Gene Ontology	GO:0090630	6	114	0.534258	0.64091	TBC1D22B|TBC1D22A|EIF5|RALGAPB|NDEL1|GMIP	http://amigo.geneontology.org/amigo/term/GO:0090630
positive regulation of ERK1 and ERK2 cascade	Gene Ontology	GO:0070374	11	213	0.535639	0.64091	CD74|SHC1|PHB2|PHB|HRAS|NQO2|LGALS9|HMGCR|CD44|P2RY6|CCL26	http://amigo.geneontology.org/amigo/term/GO:0070374
negative regulation of cell migration	Gene Ontology	GO:0030336	8	154	0.537503	0.641286	CD74|IFITM1|PTPRK|FUZ|SRGAP2|ADAM15|SHH|MCTP1	http://amigo.geneontology.org/amigo/term/GO:0030336
receptor-mediated endocytosis	Gene Ontology	GO:0006898	8	156	0.552314	0.655977	CTTN|LMBR1L|PI4KB|HYOU1|SCARB1|CAP1|DNM1|DNM2	http://amigo.geneontology.org/amigo/term/GO:0006898
actin cytoskeleton organization	Gene Ontology	GO:0030036	9	176	0.552986	0.655977	CAP1|OPHN1|EPB41|TRIP10|SSH2|ARHGAP26|DMTN|IQSEC1|CYTH2	http://amigo.geneontology.org/amigo/term/GO:0030036
interleukin-1-mediated signaling pathway	Gene Ontology	GO:0070498	5	98	0.569978	0.674203	PSMC2|IRAK1|IKBKG|IRAK4|UBC	http://amigo.geneontology.org/amigo/term/GO:0070498
cellular response to tumor necrosis factor	Gene Ontology	GO:0071356	7	140	0.582778	0.687379	PCK2|TANK|ASAH1|AKT1|RPS3|YBX3|CCL26	http://amigo.geneontology.org/amigo/term/GO:0071356
positive regulation of NF-kappaB transcription factor activity	Gene Ontology	GO:0051092	8	162	0.595495	0.699707	STAT3|LGALS9|RPS3|IKBKG|UBC|IRAK1|TRIM5|RNF31	http://amigo.geneontology.org/amigo/term/GO:0051092
negative regulation of apoptotic process	Gene Ontology	GO:0043066	27	543	0.59661	0.699707	CD74|HDAC3|KLHL20|PHB2|BIRC5|PRKAA1|CTNNB1|AKT1|IFIT3|OGG1|NUP62|HYOU1|CHD8|ARMC10|MAPK8|IRAK1|SMAD6|SHC1|CD44|HMGCR|OPA1|SHH|NOL3|ASNS|GSTP1|UBC|YBX3	http://amigo.geneontology.org/amigo/term/GO:0043066
positive regulation of MAPK cascade	Gene Ontology	GO:0043410	6	123	0.609157	0.712404	CD74|SHC1|CDK10|CTNNB1|TRIM5|HRAS	http://amigo.geneontology.org/amigo/term/GO:0043410
platelet degranulation	Gene Ontology	GO:0002576	6	124	0.617061	0.719614	SERPINA1|CYB5R1|LAMP2|TEX264|CHID1|LHFPL2	http://amigo.geneontology.org/amigo/term/GO:0002576
peptidyl-tyrosine dephosphorylation	Gene Ontology	GO:0035335	5	104	0.623052	0.724561	DUSP28|SSH2|TIMM50|PTPRK|PTP4A2	http://amigo.geneontology.org/amigo/term/GO:0035335
cellular response to lipopolysaccharide	Gene Ontology	GO:0071222	8	167	0.629847	0.730411	IRF3|HSF1|STAR|LITAF|GSTP1|HDAC5|MAPK8|IRAK1	http://amigo.geneontology.org/amigo/term/GO:0071222
regulation of cell population proliferation	Gene Ontology	GO:0042127	9	188	0.63264	0.7316	HP1BP3|SHC1|STAT1|CTNNB1|JUP|CDK6|SHH|STAT3|PPP1R9B	http://amigo.geneontology.org/amigo/term/GO:0042127
positive regulation of canonical Wnt signaling pathway	Gene Ontology	GO:0090263	7	150	0.655317	0.755419	CTDNEP1|JUP|PLEKHA4|CSNK1D|TRPM4|PSMC2|UBR5	http://amigo.geneontology.org/amigo/term/GO:0090263
inflammatory response	Gene Ontology	GO:0006954	19	398	0.661289	0.755419	STAT3|NLRP1|PLGRKT|ZNF580|CD44|NLRP2|MGLL|IFI16|SCYL3|NFKBIZ|AKT1|LGALS9|TNIP1|IKBKG|TRAF3IP2|MACIR|HDAC5|KLRG1|CCL26	http://amigo.geneontology.org/amigo/term/GO:0006954
cellular protein metabolic process	Gene Ontology	GO:0044267	7	151	0.662141	0.755419	SERPINA1|MFGE8|KTN1|P4HB|VWA1|IGFBP6|MELTF	http://amigo.geneontology.org/amigo/term/GO:0044267
calcium ion transmembrane transport	Gene Ontology	GO:0070588	6	130	0.662527	0.755419	ANXA2|CACNB3|PKD1|ITGAV|ORAI1|TRPM4	http://amigo.geneontology.org/amigo/term/GO:0070588
regulation of membrane potential	Gene Ontology	GO:0042391	5	109	0.664151	0.755419	GABRE|CHRNA5|GRIN1|TRPM4|CHRNB1	http://amigo.geneontology.org/amigo/term/GO:0042391
neutrophil degranulation	Gene Ontology	GO:0043312	23	480	0.664184	0.755419	AMPD3|DERA|RAB37|SERPINA1|ASAH1|CAP1|CEACAM1|JUP|ATG7|LPCAT1|PSMC2|ANXA2|CD44|FAF2|LAMP2|ARMC8|SERPINB6|MANBA|SNAP23|TUBB|ITGAV|GSTP1|AGPAT2	http://amigo.geneontology.org/amigo/term/GO:0043312
positive regulation of apoptotic process	Gene Ontology	GO:0043065	18	379	0.667243	0.756818	MAPK8|CDKN2A|CALHM2|ITSN1|ARHGEF9|DNM2|IP6K2|CTNNB1|PTPA|ITGB3BP|AKT1|ATG7|UBC|ING4|PAWR|SUDS3|TNFRSF12A|LDHA	http://amigo.geneontology.org/amigo/term/GO:0043065
male gonad development	Gene Ontology	GO:0008584	5	111	0.679748	0.768895	SRD5A1|STAR|NASP|YBX3|ADAM15	http://amigo.geneontology.org/amigo/term/GO:0008584
Notch signaling pathway	Gene Ontology	GO:0007219	5	112	0.687362	0.772576	MDK|ITGB1BP1|EPN1|MIB2|GALNT11	http://amigo.geneontology.org/amigo/term/GO:0007219
response to lipopolysaccharide	Gene Ontology	GO:0032496	8	176	0.687422	0.772576	PCK2|IRF3|ADH5|SMAD6|LITAF|PLCG2|LGALS9|IRAK1	http://amigo.geneontology.org/amigo/term/GO:0032496
protein localization to plasma membrane	Gene Ontology	GO:0072659	7	155	0.688601	0.772576	NKD2|CACNB3|ANXA2|JUP|RAB34|MYADM|ITGB1BP1	http://amigo.geneontology.org/amigo/term/GO:0072659
transcription, DNA-templated	Gene Ontology	GO:0006351	5	114	0.70222	0.785727	MLF1|ASXL1|POLR1D|POLR2H|MMS19	http://amigo.geneontology.org/amigo/term/GO:0006351
kidney development	Gene Ontology	GO:0001822	6	136	0.70446	0.786109	STRA6|PKD1|CTNNB1|C1GALT1|SHH|LZTS2	http://amigo.geneontology.org/amigo/term/GO:0001822
neuron differentiation	Gene Ontology	GO:0030182	8	184	0.733611	0.816438	HDAC5|COPS2|MECP2|OPHN1|CTNNB1|RUNX1|DTNB|GATA2	http://amigo.geneontology.org/amigo/term/GO:0030182
negative regulation of peptidase activity	Gene Ontology	GO:0010466	5	119	0.737187	0.818218	SERPINA1|WFDC3|PAPLN|BIRC5|SERPINB6	http://amigo.geneontology.org/amigo/term/GO:0010466
leukocyte migration	Gene Ontology	GO:0050900	8	190	0.76505	0.84421	CD74|SHC1|SLC7A6|CD44|L1CAM|ITGAV|CEACAM1|SLC7A7	http://amigo.geneontology.org/amigo/term/GO:0050900
negative regulation of neuron apoptotic process	Gene Ontology	GO:0043524	6	146	0.766179	0.84421	MDK|STAR|LGMN|HRAS|MECP2|BIRC5	http://amigo.geneontology.org/amigo/term/GO:0043524
positive regulation of GTPase activity	Gene Ontology	GO:0043547	15	341	0.766722	0.84421	TIMM23B-AGAP6|RIC8A|RALGAPB|HRAS|RABEP1|OPHN1|SRGAP2|ELMOD3|ARHGAP26|NDEL1|GMIP|IQSEC1|CCL26|RANBP1|NPRL2	http://amigo.geneontology.org/amigo/term/GO:0043547
cytoskeleton organization	Gene Ontology	GO:0007010	7	171	0.780587	0.854272	MDK|KLHL20|CAP1|PRPF40A|TUBB|PAK4|DMTN	http://amigo.geneontology.org/amigo/term/GO:0007010
innate immune response	Gene Ontology	GO:0045087	27	598	0.782563	0.854272	TRIM39|POLR3G|IKBKG|NLRC5|IFIT3|NLRP1|C1RL|NLRP2|OAS1|IFI16|CNPY3|PCBP2|IRAK1|IRAK4|IFITM1|TRIM28|TRIM26|CD46|ECSIT|SLC15A3|WFDC3|KLRG1|IRF3|IRF7|CHID1|TRIM5|ADAM15	http://amigo.geneontology.org/amigo/term/GO:0045087
central nervous system development	Gene Ontology	GO:0007417	6	149	0.782704	0.854272	PAM|GSTP1|ADAM22|SHH|CAPG|NHEJ1	http://amigo.geneontology.org/amigo/term/GO:0007417
positive regulation of neuron projection development	Gene Ontology	GO:0010976	5	127	0.78672	0.854272	ATP8A2|KDM1A|STYXL1|RANBP1|MDK	http://amigo.geneontology.org/amigo/term/GO:0010976
regulation of cell shape	Gene Ontology	GO:0008360	6	150	0.788012	0.854272	RHOQ|EPB41|PRPF40A|CDC42SE1|DMTN|MYO10	http://amigo.geneontology.org/amigo/term/GO:0008360
nervous system development	Gene Ontology	GO:0007399	25	559	0.790333	0.854272	EFNB2|SMARCC2|HMGCR|SPG7|SRGAP2|CTNNB1|AKT1|L1CAM|FMR1|MDK|ESS2|STAT3|TMEM14B|NAP1L1|OPHN1|ARHGAP26|PPP1R9B|NINJ2|NUMB|NDEL1|PAFAH1B3|PMP22|TBCB|CRIM1|SIGMAR1	http://amigo.geneontology.org/amigo/term/GO:0007399
spermatogenesis	Gene Ontology	GO:0007283	21	475	0.790537	0.854272	BCAP31|SUN1|PUM1|B4GALNT1|ZNF35|PHC2|ACOX1|OAZ3|SCMH1|IFTAP|CEP131|GOLGA3|IQCG|YBX3|DNM2|NUP62|ZSCAN2|PAFAH1B3|ZSCAN21|BRD2|CREM	http://amigo.geneontology.org/amigo/term/GO:0007283
negative regulation of angiogenesis	Gene Ontology	GO:0016525	5	128	0.792369	0.854272	CTNNB1|MECP2|GTF2I|SHC1|STAT1	http://amigo.geneontology.org/amigo/term/GO:0016525
response to hypoxia	Gene Ontology	GO:0001666	7	176	0.804773	0.865392	SLC2A8|MECP2|PRKAA1|PAM|APOLD1|LDHA|NOL3	http://amigo.geneontology.org/amigo/term/GO:0001666
cell differentiation	Gene Ontology	GO:0030154	46	1003	0.80978	0.86852	TSG101|EFNB2|STX2|SMAD6|AIMP2|CTNNB1|AKT1|PUM1|L1CAM|JHY|ELF2|TNFRSF12A|ZSCAN2|MLF1|MDK|ZNF3|ITGB1BP1|SUN1|C1GALT1|FHL1|ZNF431|SRD5A1|PPP1R9B|BCL7B|CREM|PRRC2C|PAQR5|PRMT7|NR2C1|IQCG|SOX13|NDEL1|GATA2|APOLD1|ETV1|PMP22|KAZALD1|ETV6|CEP131|TBCB|ZSCAN21|TYMP|YY1AP1|SRA1|CDK6|CTBP1	http://amigo.geneontology.org/amigo/term/GO:0030154
response to oxidative stress	Gene Ontology	GO:0006979	5	132	0.8138	0.870577	AKT1|STK25|MAPK8|RBPMS|OGG1	http://amigo.geneontology.org/amigo/term/GO:0006979
positive regulation of cytosolic calcium ion concentration	Gene Ontology	GO:0007204	6	157	0.822426	0.87514	BCAP31|PKD1|ITGAV|SELENOT|TRPM4|GATA2	http://amigo.geneontology.org/amigo/term/GO:0007204
defense response	Gene Ontology	GO:0006952	6	157	0.822426	0.87514	HSF1|CD74|STAT3|STAT1|TNIP1|IL32	http://amigo.geneontology.org/amigo/term/GO:0006952
heart development	Gene Ontology	GO:0007507	10	248	0.824407	0.87514	CASP7|ZDHHC16|SHC1|STRA6|PKD1|TAZ|CTNNB1|SHH|TCF25|PAM	http://amigo.geneontology.org/amigo/term/GO:0007507
positive regulation of angiogenesis	Gene Ontology	GO:0045766	6	158	0.826961	0.875605	STAT3|PAK4|JUP|RUNX1|PDCD6|GATA2	http://amigo.geneontology.org/amigo/term/GO:0045766
anatomical structure morphogenesis	Gene Ontology	GO:0009653	5	137	0.838058	0.885092	EFNB2|PKD1|MRPL40|SMAD6|SOX13	http://amigo.geneontology.org/amigo/term/GO:0009653
axon guidance	Gene Ontology	GO:0007411	9	230	0.840458	0.885368	EFNB2|ETV1|LAMA3|SHC1|GRB10|OPHN1|L1CAM|SHH|USP33	http://amigo.geneontology.org/amigo/term/GO:0007411
animal organ morphogenesis	Gene Ontology	GO:0009887	6	162	0.844182	0.887034	LAMA3|ASXL1|HRAS|STX2|MEIS2|FHL1	http://amigo.geneontology.org/amigo/term/GO:0009887
extracellular matrix organization	Gene Ontology	GO:0030198	10	256	0.851942	0.892922	LAMA3|ITGB5|CD44|ITGAV|VWA1|COL4A6|KAZALD1|ADAM15|POMT1|PAPLN	http://amigo.geneontology.org/amigo/term/GO:0030198
blood coagulation	Gene Ontology	GO:0007596	7	196	0.881466	0.921533	SERPINA1|AKAP1|KDM1A|PRKACA|SH2B1|SHH|GATA2	http://amigo.geneontology.org/amigo/term/GO:0007596
chemical synaptic transmission	Gene Ontology	GO:0007268	10	270	0.891825	0.930014	PMP22|CHRNA5|CHRNB1|LRP8|CTNNB1|CACNB3|PRKACA|GABRE|GRIN1|MECP2	http://amigo.geneontology.org/amigo/term/GO:0007268
positive regulation of cell migration	Gene Ontology	GO:0030335	9	255	0.911626	0.948275	MDK|STAT3|HRAS|MAZ|ITGAV|SSH2|NUMB|MYADM|CCL26	http://amigo.geneontology.org/amigo/term/GO:0030335
transmembrane transport	Gene Ontology	GO:0055085	26	641	0.915249	0.949266	TOMM40|SLC7A6|SLC7A7|NIPA1|ABCF2-H2BE1|SLC25A19|SLC43A3|ABCB7|TRPM4|SLC6A12|PSMC2|SLC12A8|OS9|MFSD8|SLC44A3|DMTN|SLC39A9|SLC15A3|SLC25A29|CTNS|SLC43A1|SLC20A2|SLC66A1|SLC22A18|SLC2A8|UBC	http://amigo.geneontology.org/amigo/term/GO:0055085
MAPK cascade	Gene Ontology	GO:0000165	11	305	0.917558	0.949266	HSF1|SHC1|HRAS|WDR83|IRS1|MAP3K4|MAPK8|MAPK12|MARK3|PSMC2|GRIN1	http://amigo.geneontology.org/amigo/term/GO:0000165
ion transmembrane transport	Gene Ontology	GO:0034220	11	306	0.919458	0.949266	TMC5|ATP6V1F|CALHM2|CHRNB1|ATP13A2|ATP6V1E1|CHRNA5|SCNN1A|TRPM4|GRIN1|GABRE	http://amigo.geneontology.org/amigo/term/GO:0034220
Fc-epsilon receptor signaling pathway	Gene Ontology	GO:0038095	5	166	0.932524	0.960361	PLCG2|PSMC2|MAPK8|IKBKG|SHC1	http://amigo.geneontology.org/amigo/term/GO:0038095
proteolysis	Gene Ontology	GO:0006508	24	632	0.954672	0.978824	CLPX|PAPLN|AGBL2|SPG7|NDEL1|IMMP1L|ADAM15|USP19|TANK|C1RL|RNPEPL1|TMEM59|TPP2|USP16|ADAM22|SHH|USP32|USP33|CASP7|LGMN|LRP8|CAPN10|SPPL2B|SCRN3	http://amigo.geneontology.org/amigo/term/GO:0006508
cell adhesion	Gene Ontology	GO:0007155	25	658	0.957483	0.978824	EFNB2|MFGE8|CTNNB1|ITGB3BP|ADAM15|CTNND1|L1CAM|TNFRSF12A|INPPL1|ITGB1BP1|CEACAM1|JUP|PXN|TROAP|LAMA3|ITGB5|CD44|NINJ2|MUC4|COL4A6|IL32|ADAM22|RPSA|ITGAV|PTPRK	http://amigo.geneontology.org/amigo/term/GO:0007155
visual perception	Gene Ontology	GO:0007601	6	208	0.959262	0.978824	HSF4|EML2|HPS1|OPA1|KIFC3|DNAJC19	http://amigo.geneontology.org/amigo/term/GO:0007601
immune system process	Gene Ontology	GO:0002376	32	818	0.95991	0.978824	CD74|MCM3AP|POLR3G|YTHDF1|NLRC5|IFIT3|MICA|BTN3A3|NLRP1|INPPL1|NLRP2|OAS1|IFI16|PCBP2|TRPM4|CNPY3|IRAK1|IRAK4|IFITM1|ORAI1|TRIM26|CD46|LGALS9|ECSIT|SLC15A3|KLRG1|IRF3|IRF7|C1RL|PTMS|CHID1|TRIM5	http://amigo.geneontology.org/amigo/term/GO:0002376
positive regulation of protein kinase B signaling	Gene Ontology	GO:0051897	5	191	0.970567	0.98726	PHB|MAZ|ITGB1BP1|IRS1|TCF7L2	http://amigo.geneontology.org/amigo/term/GO:0051897
ion transport	Gene Ontology	GO:0006811	23	674	0.988125	1	TMC5|TOMM40|NIPA2|NIPA1|ATP6V1F|CACNB3|KCNK1|SCNN1A|TRPM4|GRIN1|SLC12A8|ORAI1|CALHM2|CHRNA5|SLC15A3|CTNS|SLC20A2|SLC22A18|SLC39A9|ATP6V1E1|CHRNB1|GABRE|MELTF	http://amigo.geneontology.org/amigo/term/GO:0006811
multicellular organism development	Gene Ontology	GO:0007275	44	1157	0.988333	1	EFNB2|KDM1A|LSM14A|SCMH1|FUZ|SPRED3|AKT1|PAEP|L1CAM|TNFRSF12A|ZSCAN2|MLF1|MDK|ZNF3|NPM2|DDX11|TCTN1|MEIS2|C1GALT1|FHL1|PHC2|DISP1|CNOT2|CNOT1|PPP1R9B|APOL2|ARIH2|ZNF7|AIMP2|PAQR5|GTF2IRD1|NUMB|NDEL1|SHH|TMEM107|APOLD1|TMEM14B|KAZALD1|CEP131|TBCB|TYMP|CREM|STK36|POMT1	http://amigo.geneontology.org/amigo/term/GO:0007275
cell surface receptor signaling pathway	Gene Ontology	GO:0007166	7	310	0.996638	1	IFITM1|NUP62|HRAS|MILR1|MLKL|GLMN|KLRG1	http://amigo.geneontology.org/amigo/term/GO:0007166
immune response	Gene Ontology	GO:0006955	7	469	0.999993	1	CD74|SMAD6|IL32|IKBKG|IKBKE|TRAF3IP2|CCL26	http://amigo.geneontology.org/amigo/term/GO:0006955
adaptive immune response	Gene Ontology	GO:0002250	7	481	0.999996	1	CD74|ORAI1|BTN3A3|CD46|PRKACA|TRPM4|MICA	http://amigo.geneontology.org/amigo/term/GO:0002250
signal transduction	Gene Ontology	GO:0007165	59	2064	1	1	RNF14|HDGF|PKIG|LMBR1L|PI4KB|RRAD|COPS2|COPS3|HRAS|GMIP|CENPS-CORT|PRKAA1|SRGAP2|PLCG2|ARFRP1|MAPK12|DNM2|RPS6KB2|DGKZ|MDK|TANK|STAT1|CHRNB1|P2RY6|CAP1|CDC42SE1|STK25|PXN|RABEP1|ITGB3BP|RPS6KC1|RANBP1|IRAK4|TXNRD1|ARHGAP26|SHC1|PRR5-ARHGAP8|GABRE|IGFBP6|SH2B1|TRIP10|STAT3|CKLF|IRAK1|AKT1|GRB10|LRP8|STX2|IRS1|TYMP|CREM|OPHN1|PHB|PAK4|CCL26|PTPRK|SNX27|CHRNA5|MYO10	http://amigo.geneontology.org/amigo/term/GO:0007165
G protein-coupled receptor signaling pathway	Gene Ontology	GO:0007186	9	1147	1	1	TM2D1|RIC8A|ARHGEF9|ITSN1|ZNF219|ADCY6|AKT1|P2RY6|CCL26	http://amigo.geneontology.org/amigo/term/GO:0007186
--------------------
