# Supplementary material for: SK4 potentially modulates the alternative splicing profile associated with papillary thyroid cancer development in BHT101 cells
Source: PeerJ journal article supplement (doi:10.7717/peerj.19391), 2025-05-28
Supplement: TableS8.docx [file TableS8.docx]

| VTCN1-F | TCCAGGAAGGCAGTGGTTAA |
| --- | --- |
| VTCN1-R | TTGAAAGCAAGGACAATGACTG |
| MSX1-F | CACCCTCCGCAAACACAAG |
| MSX1-R | CGATGGACAGGTACTGCTTCT |
| EDN1-F | CTCCAAAGTCCACACAAAGATT |
| EDN1-R | AGTGCAATATAGGTGAGGTAGA |
| SLC29A4-F | CACACCCTGGCTGAAGTCA |
| SLC29A4-R | AACACCGTCTCTGGAAGGAC |
| RP11-473M20.16-F | GTTCACGCTATTCTCCTGTCTC |
| RP11-473M20.16-R | CGGATCACGAGGTCAAGAGA |
| CH507-513H4.4-F | TACCGCAGCTAGGAATAATGGA |
| CH507-513H4.4-R | TTCGCTCTGGTCCGTCTTG |
| TMEM116-M/AS-F | CAGATGATGTCCTTATTTGCTA |
| TMEM116-AS-R | ATCTCCAGAGATAAGACCAC |
| TMEM116-M-R | CTACTCTGAGATAAGACCAC |
| RBM39-M-F | TGTTCTCATCCTTATGATTG |
| RBM39-AS-F | ACATCTCGCCCTTATGATTG |
| RBM39-M/AS-R | ATATCTCACCTCTACTCCCA |
| RBM6-M/AS-F | AAAAGGATTTACTTGTTGGG |
| RBM6-AS-R | TTGGCTCCCACGAAAAGGTC |
| RBM6-M-R | TTAGAGTTCCCGAAAAGGTC |
| GAPDH-F | GGTCGGAGTCAACGGATTTG |
| GAPDH-R | GGAAGATGGTGATGGGATTTC |
